# Supplementary material for: Landscape of genomic diversity and trait discovery in soybean
Source: PubMed Central journal article supplement (PMC4814817; doi:10.1038/srep23598), 2016-03-31

# Landscape of genomic diversity and trait discovery in soybean

Babu Valliyodan<sup>1\*</sup>, Dan Qiu<sup>1\*</sup>, Gunvant Patil<sup>1\*</sup>, Peng Zeng<sup>2\*</sup>, Jiaying Huang<sup>2\*</sup>, Lu Dai<sup>2\*</sup>, Chengxuan Chen<sup>2\*</sup>, Yanjun Li<sup>2</sup>, Trupti Joshi<sup>3,4</sup>, Li Song<sup>1</sup>, Tri D. Vuong<sup>1</sup>, Theresa A. Musket<sup>1</sup>, Dong Xu<sup>3</sup>, J. Grover Shannon<sup>5</sup>, Cheng Shifeng<sup>2</sup>, Xin Liu<sup>2</sup>, and Henry T. Nguyen<sup>1</sup>

<sup>1</sup>Division of Plant Sciences and National Center for Soybean Biotechnology (NCSB), University of Missouri, Columbia 65211, USA;

<sup>2</sup>Beijing Genomics Institute-Shenzhen, Shenzhen, 518083, China; <sup>3</sup>Department of Molecular Microbiology and Immunology and Medical Research Office, School of Medicine, University of Missouri, Columbia, 65212; <sup>4</sup>Department of Computer Science, Informatics Institute and Christopher S. Bond Life Sciences Center, University of Missouri, Columbia, 65211, USA, <sup>5</sup>Division of Plant Sciences and NCSB, University of Missouri-Fisher Delta Research Center, Portageville, MO, 63873, USA.

\*These authors contributed equally to this work.

## Corresponding authors:

Xin Liu

Beijing Genomics Institute-Shenzhen, Shenzhen, 518083, China

Email: [liuxin@genomics.cn](mailto:liuxin@genomics.cn); Phone: +86-186-6629-0227

&

Henry T. Nguyen

Division of Plant Sciences and National Center for Soybean Biotechnology (NCSB), University of Missouri, Columbia MO, 65211, U.S.A

Email: [nguyenhenry@missouri.edu](mailto:nguyenhenry@missouri.edu); Phone: +1-573-882-5494

## **Supplementary Tables:**

**Supplementary Table 1.** List of the 106 soybean germplasm lines sequenced with sequence identifier.

**Supplementary Table 2.** Summary of soybean accession sequence coverage and mean depth of resequencing.

**Supplementary Table 3.** Distribution of SNPs in different chromosomes of 106 soybean accessions.

**Supplementary Table 4.** Distribution of indels within various soybean genomic regions.

**Supplementary Table 5 a.** Distribution of large effect SNPs in three soybean gene pools. **b.** GO enrichment cluster of genes with large effect SNPs.

**Supplementary Table 6.** Region of Present Absent Variation (PAV) in three gene pools (wild, landrace and elite) and gene list.

**Supplementary Table 7.** Population structure analysis of soybean germplasm.

**Supplementary Table 8.** Distribution of LD blocks in three soybean gene pools.

**Supplementary Table 9.** Gene list (496 genes) from the sweep region harboring the QTL associated with major traits.

**Supplementary Table 10.** Gene list (270 genes) of the artificial selection region harboring QTL associated with major traits.

**Supplementary Table 11.** Candidate genes associated with maturity and growth habit in soybean.

**Supplementary Table 12. Allelic variation for maturity genes in soybean.** a: Allelic variation for maturity and determinate/indeterminate growth loci. b: Details of major maturity genes used for haplogroup analysis.

**Supplementary Table 13.** Total oil and protein content in 106 soybean lines.

**Supplementary Table 14.** Copy number variation on genes associated with oil traits in soybean.

**Supplementary Table 15.** Copy number variations in total protein trait related genes.

**Supplementary Figures:**

**Supplementary Figure 1. Missing rate of SNPs for 106 soybean germplasm sequences.** Proportion of 106 individuals with missing genotype at each SNP loci was calculated. Distribution of the missing genotype proportions was shown in this figure. Majority of the SNPs had low missing rate.

**Supplementary Figure 2. Distribution rate of indels.** Distribution rate of small insertion and deletions (indels) in different genomic regions. All identified indels are shorter than or equal to 5 bp.

**Supplementary Figure 3. Gene ontology (GO) analysis of large effect SNPs genes within biological process, cellular component and molecular function.** **a.** Gene ontology (GO) of each Large effect SNPs genes were obtained by the annotation of gene functions using GO database. The blue bar is the ratio of certain category of genes number in the whole genome to the whole category gene numbers. **b.** GO enrichment analysis of large effect SNPs genes were calculated by Cytoscape 2.8 using the plugins BiNGO-2.44.

**Supplementary Figure 4. Gene ontology (GO) analysis of Present/Absent Variation (PAV) genes within biological process, cellular component and molecular function.** Gene ontology (GO) of each PAV genes were obtained by the annotation of gene functions using GO database.

**Supplementary Figure 5.** Bayesian clustering analysis of all individual (STRUCTURE, K=3; K=4; K=5; and K=6).

**Supplementary Figure 6.** Comparison of (a) Total SNPs and (b) non-synonymous SNPs in the three soybean gene pools (wild, landrace and elite cultivar).

**Supplementary Figure 7. Comparison of the diversity ( $\theta\pi$ ) levels across genic and non-genic regions.** Coding regions displayed lower diversity levels relative to intron and UTR regions. The genic regions include both coding and non-coding regions of the genes (mRNA, CDS, UTR and intron), in comparison to the genic and non-genic regions genome-wide.

**Supplementary Figure 8.** Distribution of Genomic diversity ( $\theta\pi$ ) for wild (red), landrace (blue), elite soybeans (green) and cultivated (orange) in 20 soybean chromosomes.

**Supplementary Figure 9. Frequency distribution of Genomic diversity ( $\theta\pi$ ) and Divergence index value ( $Fst$ ).** Both  $Fst$  and  $\theta\pi$  between wild, landrace and elite soybean was calculated.

**Supplementary Figure 10a-e. Haplotype analysis of Maturity genes.** A- *E1*, B-*E2*, C-*E3*, D-*E4*, E-*Dt1*. SNPviz software was used to draw pictorial clusters. Base position identical to reference (W82) are white, black – different, gray-missing data.

**Supplementary Figure 11a. Diversity and allelic variation of lipid biosynthesis genes.** Example showing the allelic variation of lipid biosynthesis related genes associated with a QTL controlling oil content. (a) The  $Fst$  between wild, landrace and elite soybean; (b) Predicted gene models in the genomic block on Chromosome 13 (4-89-11.49 Mb); (c) Comparative analysis of amino acid polymorphism in the gene *Glyma13g04571.1*, a negative regulator of lipid biosynthesis.

**Supplementary Figure 11b. Diversity and allelic variation of genes associated with protein content.** Example showing the allelic variation of seed protein related genes associated with a QTL controlling protein content. (a) The  $Fst$  between wild, landrace and elite soybean; (b) The genomic block on chromosome 20 (24.5 to 32.9 Mbp, 8.1 Mbp) is defined as major protein QTL for protein content.

Predicted gene models in this genomic region; (c) Comparative analysis of amino acid polymorphism in the gene HSP, *Glyma20g19680*; Ammonium transporter, *Glyma20g21030*; ethylene receptor, *Glyma20g21780* associated with protein content.

**Supplementary Figure 12a-b. Gene structure variation of the salt tolerance gene *CHX1* in 106 soybean lines.**

**a.** Phylogenetic clustering of *CHX1* locus (gene + 2 kb promoter region) preceded three major clades. Samples were grouped by their sequence identity to the reference (W 82). W05 and C08 were used for comparing salt-tolerant and salt sensitive genotypes, respectively<sup>23</sup>. Known indicator lines are marked with arrows. **b.** *CHX1* gene architecture in 106 lines. Dotted lines indicating the exon position. Red lines indicating that this region is deleted in group 1 (G1). G2 and G1 group indicates the sensitive while G3 indicates salt tolerant group. However, no deletion was tested in the exon at the G1 group.

**Supplementary Table 1. List of the 106 soybean germplasm lines sequenced with sequence identifier.**

| Genotypes             | Sequence identifier | Country of Origin | MG   | Determinate      | Flower Color | Pubescence Color | Seed Color     | Hilum Color     |
|-----------------------|---------------------|-------------------|------|------------------|--------------|------------------|----------------|-----------------|
| PI 518664 (Hutcheson) | HN001               | U.S.              | V    | Determinate      | White        | Gray             | Yellow         | Buff            |
| PI 548402 (Peking)    | HN002               | China             | IV   | Determinate      | White        | Tawny            | Black          | Black           |
| PI 089772             | HN003               | China             | IV   | Non-determinate  | Purpler      | Tawny            | Black          | Black           |
| PI 090763             | HN004               | China             | IV   | Non-determinate  | Purple       | Light tawny      | Black          | Black           |
| PI 404166             | HN005               | China             | III  | Non-determinate  | Purple       | Tawny            | Black          | Black           |
| PI 407788A            | HN006               | South Korea       | IV   | Determinate      | Purple       | Gray             | Yellow         | Buff            |
| PI 424298             | HN007               | South Korea       | IV   | Non-determinate  | Purple       | Tawny            | Black          | Black           |
| PI 437655             | HN008               | China             | III  | Non-determinate  | Purple       | Light tawny      | Black          | Black           |
| PI 495017C            | HN009               | China             | IV   | Non-determinate  | Purple       | Tawny            | Green          | Black           |
| PI 468915             | HN010               | China             | II   | Non-determinate  | Purple       | Tawny            | Black          | Black           |
| PI 507354             | HN011               | Japan             | I    | Determinate      | Purple       | Gray             | Yellow         | Yellow          |
| PI 567305             | HN012               | China             | IV   | Non-determinate  | Purple       | Tawny            | Black          | Black           |
| S05-11482             | HN013               | U.S.              | IV,V | Determinate      | White        | Tawny            | N/A            | Black           |
| PI 548667 (Essex)     | HN014               | U.S.              | V    | Determinate      | Purple       | Gray             | Yellow         | Imperfect black |
| PI 437654             | HN015               | China             | III  | Non-determinate  | Purple       | Tawny            | Black          | Black           |
| PI 567387             | HN016               | China             | IV   | Non-determinate  | Purple       | Light tawny      | Greenish-brown | Brown           |
| PI 437725             | HN017               | China             | IV   | Semi-determinate | Purple       | Tawny            | Black          | Black           |
| PI 437690             | HN018               | China             | III  | Semi-determinate | White        | Light tawny      | Black          | Black           |
| PI 548402             | HN019               | China             | IV   | Determinate      | White        | Tawny            | Black          | Black           |
| PI 088788             | HN020               | China             | III  | Non-determinate  | White        | Tawny            | Black          | Black           |
| PI 209332             | HN021               | Japan             | IV   | Non-determinate  | Purple       | Tawny            | Black          | Black           |
| PI 404198B            | HN022               | China             | IV   | Non-determinate  | Purple       | Tawny            | Black          | Black           |
| PI 424608A            | HN023               | South Korea       | IV   | Non-determinate  | Purple       | Tawny            | Black          | Black           |
| PI 548316             | HN024               | China             | III  | Non-determinate  | White        | Near gray        | Black          | Black           |
| PI 567516C            | HN025               | China             | IV   | Non-determinate  | Purple       | Light tawny      | Greenish-brown | Greenish-brown  |
| PI 612611             | HN026               | North Korea       | III  | Non-determinate  | Purple       | Light tawny      | Brown          | Reddish-brown   |
| S10-11227             | HN027               | U.S.              | N/A  | Non-determinate  | White        | Tawny            | Yellow         | Brown           |
| Holladay (S-100)      | HN028               | U.S.              | V    | Determinate      | Purple       | Gray             | Yellow         | Imperfect black |
| IA3023                | HN029               | U.S.              | III  | N/A              | White        | Light tawny      | Yellow         | Black           |
| Maverick              | HN030               | U.S.              | III  | Non-determinate  | Purple       | Gray             | Yellow         | Buff            |
| PI 079691-4           | HN031               | China             | III  | Non-determinate  | Purple       | Light tawny      | Brown          | Black           |
| PI 086006             | HN032               | Japan             | III  | Non-determinate  | Purple       | Tawny            | Reddish-brown  | Reddish-brown   |
| PI 087617             | HN033               | North Korea       | III  | Non-determinate  | Purple       | Tawny            | Yellow         | Tan             |
| PI 087631-1           | HN034               | Japan             | III  | Non-determinate  | Purple       | Tawny            | Light-green    | Black           |

|                     |       |                    |     |                  |        |             |                |                    |
|---------------------|-------|--------------------|-----|------------------|--------|-------------|----------------|--------------------|
| PI 196175           | HN035 | South Korea        | V   | Determinate      | Purple | Tawny       | Yellow         | Brown w/<br>black  |
| PI 200508           | HN037 | Japan              | I   | Determinate      | Purple | Gray        | Yellow         | Buff               |
| PI 248515           | HN038 | Japan              | IV  | Determinate      | White  | Gray        | Yellow         | Yellow             |
| PI 366121           | HN039 | Japan              | IV  | N/A              | Purple | Tawny       | Black          | Black              |
| PI 378702           | HN040 | Japan              | IV  | N/A              | Purple | Tawny       | Black          | Black              |
| PI 398593           | HN041 | South Korea        | V   | Determinate      | Purple | Tawny       | Yellow         | Brown              |
| PI 398595           | HN042 | South Korea        | V   | Determinate      | Purple | Tawny       | Yellow         | Brown              |
| PI 398610           | HN043 | South Korea        | V   | Semi-determinate | Purple | Gray        | Yellow         | Buff               |
| PI 398614           | HN044 | South Korea        | V   | Semi-determinate | Purple | Gray        | Yellow         | Buff               |
| PI 407162 (soja)    | HN045 | South Korea        | IV  | N/A              | Purple | Tawny       | Black          | Black              |
| PI 407184           | HN046 | South Korea        | IV  | N/A              | Purple | Tawny       | Black          | Black              |
| PI 407729           | HN047 | China              | IV  | Non-determinate  | White  | Light tawny | Black          | Black              |
| PI 407965           | HN048 | South Korea        | V   | Non-determinate  | Purple | Gray        | Yellow         | Buff               |
| PI 408105A          | HN049 | South Korea        | IV  | Determinate      | Purple | Tawny       | Reddish-brown  | Reddish-<br>brown  |
| PI 416937           | HN050 | Japan              | VI  | Determinate      | Purple | Gray        | Yellow         | Yellow             |
| PI 424078           | HN051 | South Korea        | III | Non-determinate  | Purple | Tawny       | Black          | Black              |
| PI 424079           | HN052 | South Korea        | IV  | N/A              | Purple | Tawny       | Black          | Black              |
| PI 424088           | HN053 | South Korea        | IV  | N/A              | Purple | Tawny       | Black          | Black              |
| PI 437169B          | HN054 | Russian Federation | II  | Non-determinate  | Purple | Gray        | Yellow         | Imperfect<br>black |
| PI 437679           | HN055 | China              | IV  | Semi-determinate | Purple | Tawny       | Black          | Black              |
| PI 437863A          | HN056 | China              | II  | Non-determinate  | White  | Gray        | Yellow         | Light buff         |
| PI 438258           | HN057 | China              | II  | Non-determinate  | Purple | Tawny       | Yellow         | Brown              |
| PI 458515           | HN058 | China              | IV  | Semi-determinate | White  | Tawny       | Black          | Black              |
| PI 464920B          | HN059 | China              | III | Determinate      | White  | Gray        | Yellow         | Light buff         |
| PI 467312           | HN060 | China              | II  | Non-determinate  | Purple | Tawny       | Greenish-brown | Brown              |
| PI 471938           | HN061 | Nepal              | V   | Non-determinate  | Purple | Gray        | Yellow         | Yellow             |
| PI 475783B          | HN062 | China              | II  | Semi-determinate | Purple | Gray        | Yellow         | Yellow             |
| PI 483463 (soja)    | HN063 | China              | II  | Non-determinate  | Purple | Tawny       | Black          | Black              |
| PI 518751           | HN064 | Former Serbia      | II  | Non-determinate  | Purple | Gray        | Yellow         | Imperfect<br>black |
| PI 542044           | HN065 | U.S.               | III | Non-determinate  | White  | Tawny       | Yellow         | Black              |
| PI 547862           | HN066 | U.S.               | III | Non-determinate  | White  | Tawny       | Yellow         | Black              |
| PI 548317           | HN067 | China              | III | Non-determinate  | Purple | Gray        | Green          | Buff               |
| PI 548349           | HN068 | North Korea        | III | Non-determinate  | Purple | Light tawny | Brown          | Brown              |
| PI 548415           | HN069 | China              | IV  | Non-determinate  | Purple | Near gray   | Black          | Black              |
| PI 548511           | HN070 | U.S.               | II  | Non-determinate  | Purple | Gray        | Yellow         | Imperfect<br>black |
| PI 548657 (Jackson) | HN071 | U.S.               | VII | Determinate      | White  | Gray        | Yellow         | Buff               |
| PI 549031           | HN072 | China              | III | Non-determinate  | Purple | Light tawny | Black          | Black              |
| PI 552538 (Dunbar)  | HN073 | U.S.               | III | Non-determinate  | Purple | Gray        | Yellow         | Imperfect<br>black |

|                         |       |             |       |                  |              |             |               |                 |
|-------------------------|-------|-------------|-------|------------------|--------------|-------------|---------------|-----------------|
| PI 561271               | HN074 | China       | V     | Non-determinate  | White        | Gray        | Green         | Buff            |
| PI 567230               | HN075 | China       | V     | Non-determinate  | Purple       | Light tawny | Black         | Black           |
| PI 567336B              | HN076 | China       | IV    | Non-determinate  | Purple       | Tawny       | Black         | Black           |
| PI 567343               | HN077 | China       | V     | Non-determinate  | Purple       | Light tawny | Brown         | Brown           |
| PI 567354               | HN078 | China       | IV    | Non-determinate  | White        | Tawny       | Brown         | Brown           |
| PI 567357               | HN079 | China       | III   | Non-determinate  | White        | Gray        | Yellow        | Buff            |
| PI 567383               | HN080 | China       | V     | Semi-determinate | White        | Gray        | Yellow        | Buff            |
| PI 567519               | HN081 | China       | III   | Non-determinate  | White        | Gray        | Yellow        | Dark buff       |
| PI 567611               | HN082 | China       | IV    | Non-determinate  | White        | Gray        | Yellow        | Buff            |
| PI 567651               | HN083 | China       | IV    | Semi-determinate | White        | Gray        | Yellow        | Buff            |
| PI 567690               | HN084 | China       | III   | Semi-determinate | Purple       | Gray        | Yellow        | Buff            |
| PI 567719               | HN085 | China       | IV    | Non-determinate  | White        | Gray        | Yellow        | Buff            |
| PI 567731               | HN086 | China       | III   | Semi-determinate | Dark purple  | Gray        | Yellow        | Buff            |
| PI 591539               | HN087 | U.S.        | III   | Non-determinate  | White        | Tawny       | Yellow        | Black           |
| PI 593258 (Macon)       | HN088 | N/A         | III   | Non-determinate  | White        | Tawny       | Yellow        | Black           |
| PI 594012               | HN089 | South Korea | IV, V | Determinate      | White        | Tawny       | Black         | Black           |
| PI 594512A              | HN090 | China       | VII   | Determinate      | Purple       | Tawny       | Reddish-brown | Reddish-brown   |
| PI 594599               | HN091 | China       | IV    | Semi-determinate | Purple       | Tawny       | Black         | Black           |
| PI 597387 (Pana)        | HN092 | U.S.        | III   | Non-determinate  | Purple       | Gray        | Yellow        | Buff            |
| PI 603154               | HN093 | North Korea | V     | Determinate      | White        | Gray        | Yellow        | Buff            |
| PI 603170               | HN094 | North Korea | IV    | Determinate      | Purple       | Tawny       | Reddish-brown | Reddish-brown   |
| PI 603175               | HN095 | North Korea | IV    | Determinate      | Purple       | Tawny       | Reddish-brown | Reddish-brown   |
| PI 603176A              | HN096 | North Korea | IV    | Non-determinate  | Purple       | Tawny       | Black         | Black           |
| PI 603497               | HN097 | China       | III   | Determinate      | Purple       | Tawny       | Black         | Black           |
| PI 605869A              | HN098 | Vietnam     | V     | Non-determinate  | Purple       | Tawny       | Green         | Black           |
| PI 639740 (LD00-3309)   | HN099 | U.S.        | IV    | Non-determinate  | Purple       | Tawny       | Yellow        | Black           |
| PI 647086               | HN100 | U.S.        | VIII  | Determinate      | Purple       | Gray        | Yellow        | Imperfect black |
| PI 658519 (LD00-2817)   | HN101 | N/A         | VII   | Non-determinate  | Purple       | Tawny       | Reddish-brown | Reddish-brown   |
| S07-5049                | HN102 | U.S.        | IV    | Non-determinate  | Purple       | Light tawny | Yellow        | Buff            |
| V71-370                 | HN103 | U.S.        | VI    | N/A              | N/A          | N/A         | Yellow        | N/A             |
| FC 31721                | HN104 | N/A         | VI    | Non-determinate  | Purple       | Tawny       | Brown         | Brown           |
| PI 438471 (Fiskeby III) | HN105 | Sweden      | 0     | Determinate      | Purple       | Tawny       | Yellow        | Brown           |
| PI 417091               | HN106 | Japan       | II    | Non-determinate  | Purple       | Tawny       | Black         | Black           |
| PI 417015               | HN107 | Japan       | III   | Determinate      | Light purple | Gray        | Yellow        | Buff            |

---

Color coded Text

---



|                           |                                     |                                      |
|---------------------------|-------------------------------------|--------------------------------------|
| <b>Red</b>                | <b>Glycine soja</b>                 | <b>7</b>                             |
| <b>Blue</b>               | <b>Landrace</b>                     | <b>43</b>                            |
| <b>Green</b>              | <b>Elite lines/Breeding parents</b> | <b>56</b>                            |
| <b>Flowering type</b>     |                                     |                                      |
| Determinate               | <b>60</b>                           |                                      |
| Indeterminate             | <b>28</b>                           |                                      |
| Semi-determinate          | <b>12</b>                           |                                      |
| <b>Country of origin:</b> |                                     |                                      |
| China                     | 46                                  |                                      |
| South Korea               | 16                                  |                                      |
| North Korea               | 7                                   |                                      |
| Japan                     | 11                                  |                                      |
| USA                       | 17                                  |                                      |
| Vietnam                   | 1                                   | (These can be combined as Others- 5) |
| Sweden                    | 1                                   | "                                    |
| Russia +Serbia            | 2                                   | "                                    |
| Nepal                     | 1                                   | "                                    |

**Supplementary Table 2. Summary of soybean accession sequence coverage and mean depth of resequencing.**

| <b>Genotypes</b> | <b>ID</b> | <b>Mean Depth</b> | <b>Coverage(%)</b> | <b>Total Reads</b> | <b>Total Bases</b> |
|------------------|-----------|-------------------|--------------------|--------------------|--------------------|
| PI_518664        | HN001     | 14.8              | 97.24              | 169012338          | 15211110420        |
| Peking           | HN002     | 15.68             | 97.07              | 182862604          | 16457634360        |
| PI_089772        | HN003     | 16.3              | 96.79              | 190153268          | 17113794120        |
| PI_090763        | HN004     | 14.28             | 96.57              | 167923632          | 15113126880        |
| PI_404166        | HN005     | 16.58             | 97.31              | 193155444          | 17383989960        |
| PI_407788A       | HN006     | 15.5              | 97.19              | 178857216          | 16097149440        |
| PI_424298        | HN007     | 16.18             | 97.27              | 190922894          | 17183060460        |
| PI_437655        | HN008     | 13.37             | 96.86              | 162161226          | 14594510340        |
| PI_495017C       | HN009     | 15.6              | 97.38              | 182789762          | 16451078580        |
| PI_468915        | HN010     | 12.51             | 95.55              | 144058760          | 12965288400        |
| PI_507354        | HN011     | 13.29             | 97.24              | 153640902          | 13827681180        |
| PI_567305        | HN012     | 13.39             | 95.91              | 155405290          | 13986476100        |
| S05-11482        | HN013     | 15.76             | 97.66              | 185390372          | 16685133480        |
| PI_548667        | HN014     | 13.64             | 97.21              | 161696054          | 14552644860        |
| PI_437654        | HN015     | 15.77             | 96.66              | 186339704          | 16770573360        |
| PI_567387        | HN016     | 20.48             | 97.26              | 243020574          | 21871851660        |
| PI_437725        | HN017     | 19.8              | 96.41              | 235192378          | 21167314020        |
| PI_437690        | HN018     | 14.15             | 96.87              | 167942518          | 15114826620        |
| PI_548402        | HN019     | 18.37             | 97.43              | 215669112          | 19410220080        |
| PI_088788        | HN020     | 12                | 96.35              | 141883428          | 12769508520        |
| PI_209332        | HN021     | 15.82             | 97.07              | 182081550          | 16387339500        |
| PI_404198B       | HN022     | 14.84             | 96.64              | 171861964          | 15467576760        |
| PI_424608A       | HN023     | 12.58             | 96.99              | 145279868          | 13075188120        |
| PI_548316        | HN024     | 17.68             | 97.28              | 203063302          | 18275697180        |
| PI_567516C       | HN025     | 13.22             | 95.92              | 157577702          | 14181993180        |
| PI_612611        | HN026     | 14.9              | 97.08              | 177478250          | 15973042500        |
| S10-11227        | HN027     | 17.17             | 97.51              | 195287660          | 17575889400        |
| Holladay         | HN028     | 17.6              | 97.74              | 203654054          | 18328864860        |
| IA3023           | HN029     | 16.27             | 98.5               | 186734870          | 16806138300        |
| Maverick         | HN030     | 16.34             | 98.16              | 186590730          | 16793165700        |
| PI_079691-4      | HN031     | 15.08             | 96.82              | 178065582          | 16025902380        |
| PI_086006        | HN032     | 19.54             | 97.55              | 234928518          | 21143566620        |
| PI_087617        | HN033     | 19.64             | 97.92              | 227710262          | 20493923580        |
| PI_087631-1      | HN034     | 16.36             | 97.31              | 194753982          | 17527858380        |
| PI_196175        | HN035     | 18.59             | 97.59              | 215692734          | 19412346060        |
| PI_200508        | HN037     | 14.84             | 97.55              | 179642206          | 16167798540        |
| PI_248515        | HN038     | 12.67             | 97.32              | 155145388          | 13963084920        |
| PI_366121        | HN039     | 16.97             | 97.61              | 213554280          | 19219885200        |
| PI_378702        | HN040     | 14.29             | 96.46              | 179746598          | 16177193820        |
| PI_398593        | HN041     | 18.63             | 97.7               | 213815782          | 19243420380        |

|            |       |       |       |           |             |
|------------|-------|-------|-------|-----------|-------------|
| PI_398595  | HN042 | 19.64 | 97.7  | 229236844 | 20631315960 |
| PI_398610  | HN043 | 19.95 | 97.68 | 232987084 | 20968837560 |
| PI_398614  | HN044 | 16.93 | 97.56 | 196015226 | 17641370340 |
| PI_407162  | HN045 | 19.51 | 97.02 | 228079008 | 20527110720 |
| PI_407184  | HN046 | 18.81 | 96.38 | 224516646 | 20206498140 |
| PI_407729  | HN047 | 17.84 | 97.23 | 207398246 | 18665842140 |
| PI_407965  | HN048 | 20.48 | 97.66 | 239711488 | 21574033920 |
| PI_408105A | HN049 | 17.38 | 97.81 | 200239264 | 18021533760 |
| PI_416937  | HN050 | 19.48 | 97.73 | 223204656 | 20088419040 |
| PI_424078  | HN051 | 18.29 | 97.11 | 216599770 | 19493979300 |
| PI_424079  | HN052 | 18.4  | 96.78 | 218858586 | 19697272740 |
| PI_424088  | HN053 | 17.93 | 96.7  | 212540282 | 19128625380 |
| PI_437169B | HN054 | 19.19 | 97.85 | 219653914 | 19768852260 |
| PI_437679  | HN055 | 17.68 | 97.32 | 206104066 | 18549365940 |
| PI_437863A | HN056 | 19.3  | 97.93 | 224912934 | 20242164060 |
| PI_438258  | HN057 | 17.98 | 98.22 | 206996246 | 18629662140 |
| PI_458515  | HN058 | 14.3  | 98.41 | 172032796 | 15482951640 |
| PI_464920B | HN059 | 20.7  | 98.03 | 244836236 | 22035261240 |
| PI_467312  | HN060 | 17.78 | 97.5  | 213275758 | 19194818220 |
| PI_471938  | HN061 | 16.82 | 97.72 | 199250662 | 17932559580 |
| PI_475783B | HN062 | 15.31 | 98.01 | 178533828 | 16068044520 |
| PI_483463  | HN063 | 14.96 | 95.76 | 183277998 | 16495019820 |
| PI_518751  | HN064 | 14.69 | 97.22 | 171088604 | 15397974360 |
| PI_542044  | HN065 | 22.72 | 99.3  | 253465324 | 22811879160 |
| PI_547862  | HN066 | 20.43 | 99.22 | 232670066 | 20940305940 |
| PI_548317  | HN067 | 18.84 | 97.63 | 218281110 | 19645299900 |
| PI_548349  | HN068 | 20.39 | 97.75 | 240767152 | 21669043680 |
| PI_548415  | HN069 | 16.23 | 97.24 | 191324332 | 17219189880 |
| PI_548511  | HN070 | 16.39 | 97.98 | 194321730 | 17488955700 |
| PI_548657  | HN071 | 16.94 | 97.76 | 199866892 | 17988020280 |
| PI_549031  | HN072 | 15.95 | 97.3  | 189097166 | 17018744940 |
| PI_552538  | HN073 | 17.52 | 98.2  | 204243824 | 18381944160 |
| PI_561271  | HN074 | 17.65 | 97.73 | 210015330 | 18901379700 |
| PI_567230  | HN075 | 17.4  | 97.11 | 205061116 | 18455500440 |
| PI_567336B | HN076 | 17.94 | 97.18 | 209908592 | 18891773280 |
| PI_567343  | HN077 | 14.6  | 96.96 | 169266356 | 15233972040 |
| PI_567354  | HN078 | 17.61 | 97.56 | 202046178 | 18184156020 |
| PI_567357  | HN079 | 15.85 | 97.34 | 181795242 | 16361571780 |
| PI_567383  | HN080 | 18.44 | 97.66 | 216112624 | 19450136160 |
| PI_567519  | HN081 | 17.33 | 98.29 | 198156232 | 17834060880 |
| PI_567611  | HN082 | 18.14 | 97.64 | 212037010 | 19083330900 |
| PI_567651  | HN083 | 15.03 | 97.37 | 176228940 | 15860604600 |
| PI_567690  | HN084 | 17.16 | 97.61 | 200696298 | 18062666820 |
| PI_567719  | HN085 | 15.11 | 97.76 | 205652200 | 18508698000 |
| PI_567731  | HN086 | 15.6  | 97.44 | 182659124 | 16439321160 |
| PI_591539  | HN087 | 19.09 | 99.28 | 214446256 | 19300163040 |

|            |       |       |       |             |             |
|------------|-------|-------|-------|-------------|-------------|
| PI_593258  | HN088 | 17.8  | 98.42 | 203637960   | 18327416400 |
| PI_594012  | HN089 | 18.38 | 97.76 | 214102900   | 19269261000 |
| PI_594512A | HN090 | 20.49 | 97.79 | 235461772   | 21191559480 |
| PI_594599  | HN091 | 14.87 | 97.81 | 182991332   | 16469219880 |
| PI_597387  | HN092 | 17.35 | 98.37 | 210656058   | 18959045220 |
| PI_603154  | HN093 | 17.62 | 97.92 | 202119518   | 18190756620 |
| PI_603170  | HN094 | 17.44 | 97.72 | 203885070   | 18349656300 |
| PI_603175  | HN095 | 24.6  | 97.76 | 285733800   | 25716042000 |
| PI_603176A | HN096 | 18.92 | 97.89 | 218750198   | 19687517820 |
| PI_603497  | HN097 | 15.56 | 97.57 | 193730402   | 17435736180 |
| PI_605869A | HN098 | 15.96 | 97.79 | 196814124   | 17713271160 |
| PI_639740  | HN099 | 13.69 | 98.31 | 168515406   | 15166386540 |
| PI_647086  | HN100 | 18.2  | 98.07 | 208002580   | 18720232200 |
| PI_658519  | HN101 | 18.71 | 98.31 | 214508272   | 19305744480 |
| S07-5049   | HN102 | 20.88 | 98.61 | 238623482   | 21476113380 |
| V71-370    | HN103 | 19.09 | 97.8  | 220099746   | 19808977140 |
| FC_31721   | HN104 | 20.2  | 97.07 | 234212784   | 21079150560 |
| PI_438471  | HN105 | 24.01 | 97.83 | 279508308   | 25155747720 |
| PI_417091  | HN106 | 22.45 | 97.38 | 263451824   | 23710664160 |
| PI_417015  | HN107 | 16.22 | 96.68 | 188059874   | 16925388660 |
| Total      |       | 17.16 | 97.48 | 21331077404 | 1.92E+12    |

**Supplementary Table 3. Distribution of SNPs in different chromosomes of 106 soybean accessions.**

|              | Total    | Intergenic | Intron  | 5'-UTR | 3'-UTR | Exon   |                |            |
|--------------|----------|------------|---------|--------|--------|--------|----------------|------------|
|              |          |            |         |        |        | Total  | Nonsynonymous* | Synonymous |
| <b>Gm01</b>  | 543355   | 473103     | 43488   | 4078   | 6798   | 15888  | 9496           | 6405       |
| <b>Gm02</b>  | 478949   | 390621     | 54810   | 5832   | 8770   | 18916  | 11098          | 7830       |
| <b>Gm03</b>  | 578158   | 483219     | 60010   | 4998   | 8583   | 21348  | 12852          | 8499       |
| <b>Gm04</b>  | 516441   | 436810     | 51665   | 4981   | 7390   | 15595  | 9190           | 6416       |
| <b>Gm05</b>  | 376452   | 304637     | 44664   | 4807   | 7483   | 14861  | 8610           | 6264       |
| <b>Gm06</b>  | 570418   | 464902     | 65534   | 6495   | 9853   | 23634  | 14259          | 9394       |
| <b>Gm07</b>  | 462355   | 365293     | 60758   | 5915   | 9060   | 21329  | 12667          | 8678       |
| <b>Gm08</b>  | 471167   | 356903     | 72178   | 7084   | 11048  | 23954  | 13792          | 10179      |
| <b>Gm09</b>  | 485670   | 398083     | 55900   | 5632   | 7560   | 18495  | 10932          | 7582       |
| <b>Gm10</b>  | 524201   | 435637     | 56166   | 5289   | 8227   | 18882  | 10984          | 7909       |
| <b>Gm11</b>  | 388464   | 316025     | 45194   | 4658   | 7143   | 15444  | 8978           | 6477       |
| <b>Gm12</b>  | 414629   | 343005     | 43916   | 4754   | 7102   | 15852  | 9296           | 6562       |
| <b>Gm13</b>  | 511424   | 395165     | 71999   | 7595   | 11499  | 25166  | 14719          | 10455      |
| <b>Gm14</b>  | 554802   | 471356     | 52577   | 4704   | 7554   | 18611  | 11382          | 7239       |
| <b>Gm15</b>  | 656251   | 556855     | 62862   | 5627   | 8722   | 22185  | 13763          | 8429       |
| <b>Gm16</b>  | 499810   | 397009     | 61411   | 5926   | 8919   | 26545  | 16396          | 10162      |
| <b>Gm17</b>  | 447863   | 370578     | 47419   | 5104   | 8191   | 16571  | 9533           | 7047       |
| <b>Gm18</b>  | 824220   | 696508     | 78750   | 7557   | 11287  | 30118  | 18357          | 11780      |
| <b>Gm19</b>  | 528172   | 447899     | 51137   | 4823   | 7410   | 16903  | 10060          | 6848       |
| <b>Gm20</b>  | 492594   | 411288     | 51407   | 5004   | 7653   | 17242  | 10359          | 6889       |
| <b>GmU</b>   | 91890    | 88416      | 1749    | 160    | 339    | 1226   | 837            | 388        |
| <b>Total</b> | 10417285 | 8603312    | 1133594 | 111023 | 170591 | 398765 | 237560         | 161432     |

\*SNPs located in overlap regions of different transcripts were annotated independently. Some SNPs are synonymous SNPs in one transcript, and at the same time non-synonymous SNPs in another overlapping transcript and vice versa. Thus the sum of synonymous and non-synonymous SNPs is more than the number of SNPs in the CDS regions

**Supplementary Table 4. Distribution of indels within various soybean genomic regions**

| <b>Chromosome</b> | <b>Indel</b> | <b>Intergenic</b> | <b>Intron</b> | <b>5'-UTR</b> | <b>3'-UTR</b> | <b>Exon</b> |
|-------------------|--------------|-------------------|---------------|---------------|---------------|-------------|
| <b>Gm01</b>       | 34228        | 28276             | 4251          | 572           | 760           | 369         |
| <b>Gm02</b>       | 37312        | 29072             | 5753          | 861           | 1080          | 546         |
| <b>Gm03</b>       | 40449        | 32243             | 5949          | 718           | 1006          | 533         |
| <b>Gm04</b>       | 35377        | 28392             | 4896          | 730           | 903           | 456         |
| <b>Gm05</b>       | 27109        | 20944             | 4280          | 636           | 873           | 376         |
| <b>Gm06</b>       | 41817        | 32895             | 6358          | 810           | 1150          | 604         |
| <b>Gm07</b>       | 35429        | 27220             | 5801          | 793           | 1053          | 562         |
| <b>Gm08</b>       | 39755        | 29356             | 7476          | 975           | 1323          | 625         |
| <b>Gm09</b>       | 36419        | 28252             | 5902          | 812           | 975           | 478         |
| <b>Gm10</b>       | 37908        | 29949             | 5795          | 730           | 906           | 528         |
| <b>Gm11</b>       | 28171        | 21798             | 4433          | 652           | 830           | 458         |
| <b>Gm12</b>       | 27958        | 21913             | 4179          | 590           | 872           | 404         |
| <b>Gm13</b>       | 43732        | 33342             | 7307          | 1041          | 1362          | 680         |
| <b>Gm14</b>       | 34416        | 27758             | 4759          | 637           | 823           | 439         |
| <b>Gm15</b>       | 44067        | 35834             | 5969          | 738           | 923           | 603         |
| <b>Gm16</b>       | 37233        | 28943             | 5958          | 786           | 974           | 572         |
| <b>Gm17</b>       | 34747        | 27591             | 4916          | 751           | 1011          | 478         |
| <b>Gm18</b>       | 57177        | 46373             | 7907          | 1000          | 1219          | 678         |
| <b>Gm19</b>       | 35836        | 28914             | 4902          | 658           | 889           | 473         |
| <b>Gm20</b>       | 32670        | 25824             | 4831          | 665           | 932           | 418         |
| <b>GmU</b>        | 4004         | 3761              | 159           | 14            | 38            | 32          |
| <b>Total</b>      | 745814       | 588650            | 111781        | 15169         | 19902         | 10312       |

**Supplementary Table 5 a. Distribution of large effect SNPs in three soybean gene pools.**

| Group      | Premature stop | Stop to non Stop code | Start to non start code | Splice sites | Total |
|------------|----------------|-----------------------|-------------------------|--------------|-------|
| Wild       | 5271           | 963                   | 886                     | 3100         | 10220 |
| Landrace   | 3897           | 757                   | 622                     | 2460         | 7736  |
| Elite      | 4104           | 733                   | 698                     | 2612         | 8147  |
| Cultivated | 5254           | 928                   | 845                     | 3210         | 10237 |
| Total      | 6236           | 1072                  | 1000                    | 3721         | 12029 |

Cultivated = Landrace + Elite

**Supplementary Table 5 b. GO enrichment cluster of genes with large effect SNPs<sup>1,2</sup>.**

| GO-ID     | Description                   | cluster freq | total freq     | P-value      | Genes in the test set                                                                                                                                                                                                                                                                                                                                                                                                                                                                                                                                                                                                                                                                                                                                                                                                                                                                                                                                                                                                                                                                                                                                                                                                                                                                                                                                                                                                                                                                                                                                                                                                                                                                                                                                                                                                                                                                                                                                                                                                                                                                                                                                                                                                                                                                                                                                                                                                                                                                                                                                                                                                                                                                                                                                                                                                                                                                                                                                                                                                                                                                                                                                                                                                                                                                                                                                                                                                                                                                                                                                                                                                                                                                                                                                                                                                                                                                                                                                                                                                                                                                                                                                                                                                                                                                                                                                                                                                                                      |
|-----------|-------------------------------|--------------|----------------|--------------|------------------------------------------------------------------------------------------------------------------------------------------------------------------------------------------------------------------------------------------------------------------------------------------------------------------------------------------------------------------------------------------------------------------------------------------------------------------------------------------------------------------------------------------------------------------------------------------------------------------------------------------------------------------------------------------------------------------------------------------------------------------------------------------------------------------------------------------------------------------------------------------------------------------------------------------------------------------------------------------------------------------------------------------------------------------------------------------------------------------------------------------------------------------------------------------------------------------------------------------------------------------------------------------------------------------------------------------------------------------------------------------------------------------------------------------------------------------------------------------------------------------------------------------------------------------------------------------------------------------------------------------------------------------------------------------------------------------------------------------------------------------------------------------------------------------------------------------------------------------------------------------------------------------------------------------------------------------------------------------------------------------------------------------------------------------------------------------------------------------------------------------------------------------------------------------------------------------------------------------------------------------------------------------------------------------------------------------------------------------------------------------------------------------------------------------------------------------------------------------------------------------------------------------------------------------------------------------------------------------------------------------------------------------------------------------------------------------------------------------------------------------------------------------------------------------------------------------------------------------------------------------------------------------------------------------------------------------------------------------------------------------------------------------------------------------------------------------------------------------------------------------------------------------------------------------------------------------------------------------------------------------------------------------------------------------------------------------------------------------------------------------------------------------------------------------------------------------------------------------------------------------------------------------------------------------------------------------------------------------------------------------------------------------------------------------------------------------------------------------------------------------------------------------------------------------------------------------------------------------------------------------------------------------------------------------------------------------------------------------------------------------------------------------------------------------------------------------------------------------------------------------------------------------------------------------------------------------------------------------------------------------------------------------------------------------------------------------------------------------------------------------------------------------------------------------------------------|
| GO:032559 | adenyl ribonucleotide binding | 342/169<br>5 | 3915/<br>27682 | 1.39E<br>-12 | Glyma13G41790,Glyma04G04510,Glyma04G09210,Glyma20G26160,Glyma14G36660,Glyma13G36600,Glyma18G00700,Glyma19G39680,Glyma12G06530,Glyma07G08120,Glyma01G03410,Glyma09G30430,Glyma12G34330,Glyma10G30060,Glyma02G03070,Glyma13G26000,Glyma11G15520,Glyma18G50510,Glyma13G18690,Glyma16G08560,Glyma12G08900,Glyma16G25010,Glyma0028S00210,Glyma17G34190,Glyma13G05430,Glyma18G01960,Glyma06G40690,Glyma09G03190,Glyma17G08540,Glyma17G01730,Glyma20G16170,Glyma11G20180,Glyma13G25420,Glyma07G07550,Glyma19G31720,Glyma13G23840,Glyma06G39990,Glyma13G17440,Glyma04G04380,Glyma05G34180,Glyma02G45800,Glyma08G03240,Glyma16G34030,Glyma17G10420,Glyma14G33400,Glyma02G11110,Glyma06G17560,Glyma18G07080,Glyma13G21820,Glyma07G32200,Glyma13G35790,Glyma19G39580,Glyma06G41880,Glyma06G45590,Glyma19G41210,Glyma06G15900,Glyma18G48600,Glyma07G07110,Glyma05G33240,Glyma04G05920,Glyma13G21030,Glyma01G07970,Glyma06G21140,Glyma07G01890,Glyma02G47230,Glyma18G09670,Glyma16G24940,Glyma16G04910,Glyma15G36110,Glyma20G23010,Glyma18G11590,Glyma15G10370,Glyma04G41060,Glyma08G09050,Glyma08G46130,Glyma05G32070,Glyma09G24410,Glyma18G50450,Glyma06G41430,Glyma14G02740,Glyma08G41510,Glyma18G40680,Glyma10G07500,Glyma05G27850,Glyma05G30650,Glyma11G34210,Glyma17G34410,Glyma15G20000,Glyma04G01440,Glyma15G37390,Glyma11G19120,Glyma16G21050,Glyma06G08480,Glyma09G33120,Glyma18G09290,Glyma09G19730,Glyma14G04930,Glyma11G37910,Glyma20G37930,Glyma11G09060,Glyma18G16060,Glyma13G16540,Glyma09G34860,Glyma20G27860,Glyma18G15150,Glyma08G39070,Glyma08G12540,Glyma12G32880,Glyma03G05640,Glyma01G10100,Glyma14G06570,Glyma03G02310,Glyma15G02520,Glyma01G27440,Glyma11G04310,Glyma18G06990,Glyma03G30310,Glyma15G37320,Glyma15G13290,Glyma16G32640,Glyma12G17340,Glyma13G40550,Glyma13G06620,Glyma17G38210,Glyma15G34810,Glyma07G09260,Glyma09G08370,Glyma13G25970,Glyma06G21910,Glyma07G11880,Glyma08G13040,Glyma16G32700,Glyma13G38950,Glyma08G13150,Glyma18G45440,Glyma17G33470,Glyma06G47650,Glyma07G00670,Glyma20G38380,Glyma06G20360,Glyma20G34060,Glyma20G38610,Glyma16G02290,Glyma14G12710,Glyma01G42240,Glyma16G22370,Glyma02G09080,Glyma05G30800,Glyma16G27250,Glyma08G40030,Glyma18G52480,Glyma17G02080,Glyma03G33590,Glyma16G33590,Glyma03G36310,Glyma14G07750,Glyma02G40850,Glyma16G02340,Glyma07G00340,Glyma10G38450.2,Glyma11G09070,Glyma04G43190,Glyma19G31950,Glyma18G44800,Glyma11G02150,Glyma18G50540,Glyma01G42770,Glyma13G43480,Glyma05G21420,Glyma17G09700,Glyma16G29040,Glyma18G09980,Glyma02G06700,Glyma10G41990,Glyma12G16450,Glyma03G32530,Glyma14G00380,Glyma20G06780,Glyma01G41150,Glyma04G36240,Glyma14G10790,Glyma20G29060,Glyma09G35140,Glyma16G32830,Glyma07G16260,Glyma08G44620,Glyma08G40920,Glyma06G20200,Glyma20G27790,Glyma09G05550,Glyma09G28260,Glyma09G02930,Glyma20G27800,Glyma19G38970,Glyma17G34060,Glyma15G37290,Glyma09G37580,Glyma20G35970,Glyma12G03140,Glyma03G04780,Glyma01G39380,Glyma10G38810,Glyma18G45200,Glyma18G53590,Glyma17G16070,Glyma02G46070,Glyma01G00960,Glyma07G30260,Glyma09G40150,Glyma08G06730,Glyma18G08220,Glyma02G46670,Glyma14G05060,Glyma02G03760,Glyma08G06520,Glyma16G03780,Glyma09G38730,Glyma03G29230,Glyma16G07060,Glyma07G39300,Glyma05G02470,Glyma18G38470,Glyma06G40780,Glyma10G32800,Glyma04G27730,Glyma06G47870,Glyma11G19880,Glyma18G47590,Glyma07G04560,Glyma06G40110,Glyma06G08880,Glyma19G44690,Glyma13G02620,Glyma04G06610,Glyma18G50650,Glyma09G30070,Glyma10G08040,Glyma20G30100,Glyma18G49060,Glyma17G16070,Glyma02G46070,Glyma01G00960,Glyma07G30260,Glyma09G18G47140,Glyma06G18700,Glyma20G27720,Glyma13G42950,Glyma18G50440,Glyma06G40710,Glyma06G40920,Glyma05G23260,Glyma18G46930,Glyma13G10530,Glyma05G01460,Glyma14G36960,Glyma18G51960,Glyma13G10040,Glyma17G04470,Glyma15G17430,Glyma09G13540,Glyma06G40740,Glyma15G42030,Glyma06G02010,Glyma09G26710,Glyma09G05710,Glyma16G10080,Glyma07G31140,Glyma15G00670,Glyma17G09120,Glyma03G00540,Glyma18G04440,Glyma06G40980,Glyma03G05400,Glyma18G06880,Glyma08G18760,Glyma12G12130,Glyma02G48100,Glyma12G34890,Glyma15G00340,Glyma10G32990,Glyma12G33340,Glyma06G40350,Glyma15G00950,Glyma18G10610,Glyma07G10460,Glyma14G29130,Glyma08G15360,Glyma15G37140,Glyma11G27200,Glyma13G10200,Glyma19G35270,Glyma11G05140,Glyma06G40670,Glyma04G01110,Glyma09G406650,Glyma18G51950,Glyma05G03440,Glyma15G04850,Glyma16G32710,Glyma16G10760,Glyma19G00650,Glyma18G42700,Glyma07G09530,Glyma04G34140,Glyma10G35610,Glym |





GO:001882      nucleoside binding      356/169 5      4166/ 27682      7.70E -12

Glyma13G41790,Glyma04G04510,Glyma04G09210,Glyma20G26160,Glyma14G36660,Glyma13G36600,Glyma18G00700,Glyma17G08610,Glyma19G39680,Glyma12G06530,Glyma07G08120,Glyma01G03410,Glyma09G30430,Glyma12G34330,Glyma10G30060,Glyma02G03070,Glyma13G26000,Glyma15G14020,Glyma11G15520,Glyma18G50510,Glyma13G18690,Glyma16G08560,Glyma12G08900,Glyma16G25010,Glyma0028S00210,Glyma17G34190,Glyma13G05430,Glyma18G01960,Glyma06G40690,Glyma09G03190,Glyma17G08540,Glyma17G01730,Glyma20G16170,Glyma11G20180,Glyma13G25420,Glyma07G07550,Glyma19G31720,Glyma13G23840,Glyma06G39990,Glyma13G17440,Glyma04G04380,Glyma05G34180,Glyma02G45800,Glyma08G03240,Glyma16G34030,Glyma17G10420,Glyma14G33400,Glyma02G11110,Glyma06G17560,Glyma18G07080,Glyma08G08500,Glyma13G21820,Glyma07G32200,Glyma13G35790,Glyma19G39580,Glyma06G41880,Glyma06G45590,Glyma19G41210,Glyma06G15900,Glyma18G48600,Glyma07G0710,Glyma05G33240,Glyma04G05920,Glyma01G07970,Glyma13G21030,Glyma06G21140,Glyma07G01890,Glyma02G47230,Glyma18G09670,Glyma16G24940,Glyma16G04910,Glyma15G36110,Glyma20G23010,Glyma18G11590,Glyma15G10370,Glyma15G14080,Glyma04G41060,Glyma08G09050,Glyma08G46130,Glyma05G32070,Glyma09G24410,Glyma18G50450,Glyma14G02740,Glyma06G41430,Glyma08G41510,Glyma18G40680,Glyma10G07500,Glyma05G27850,Glyma15G23150,Glyma05G30650,Glyma11G34210,Glyma17G34410,Glyma15G20000,Glyma04G01440,Glyma15G37390,Glyma11G19120,Glyma16G21050,Glyma06G08480,Glyma09G33120,Glyma18G09290,Glyma09G19730,Glyma14G04930,Glyma11G37910,Glyma20G37930,Glyma11G09060,Glyma18G16060,Glyma13G16540,Glyma09G34860,Glyma20G27860,Glyma18G15150,Glyma08G39070,Glyma08G12540,Glyma12G32880,Glyma03G05640,Glyma01G10100,Glyma14G06570,Glyma03G02310,Glyma15G02520,Glyma01G27440,Glyma11G04310,Glyma18G06990,Glyma03G0310,Glyma15G37320,Glyma15G13290,Glyma16G32640,Glyma12G17340,Glyma13G40550,Glyma13G06620,Glyma17G38210,Glyma15G34810,Glyma06G21910,Glyma07G09260,Glyma09G08370,Glyma13G25970,Glyma07G11880,Glyma08G13040,Glyma16G32700,Glyma13G38950,Glyma08G13150,Glyma18G45440,Glyma17G33470,Glyma06G47650,Glyma07G00670,Glyma20G38380,Glyma06G20360,Glyma20G34060,Glyma20G38610,Glyma16G02290,Glyma14G12710,Glyma01G42240,Glyma16G22370,Glyma02G09080,Glyma05G30800,Glyma16G27250,Glyma08G40030,Glyma18G52480,Glyma17G02080,Glyma03G33590,Glyma16G33590,Glyma03G36310,Glyma14G07750,Glyma02G40850,Glyma16G02340,Glyma10G38450,2.Glyma07G00340,Glyma11G09070,Glyma04G43190,Glyma19G31950,Glyma18G44800,Glyma15G14200,Glyma11G02150,Glyma18G50540,Glyma01G42770,Glyma05G21420,Glyma13G43480,Glyma17G09700,Glyma16G29040,Glyma18G09980,Glyma01G43190,Glyma02G06700,Glyma10G41990,Glyma12G16450,Glyma03G32530,Glyma14G00380,Glyma20G06780,Glyma01G41150,Glyma04G36240,Glyma14G10790,Glyma19G34960,Glyma20G29060,Glyma09G35140,Glyma11G15530,Glyma16G32830,Glyma07G16260,Glyma08G44620,Glyma08G40920,Glyma06G20200,Glyma20G27790,Glyma09G05550,Glyma09G28260,Glyma09G02930,Glyma19G38970,Glyma20G27800,Glyma17G34060,Glyma15G37290,Glyma09G37580,Glyma20G35970,Glyma12G03140,Glyma03G04780,Glyma01G39380,Glyma10G38810,Glyma18G45200,Glyma18G53590,Glyma17G16070,Glyma02G46070,Glyma01G00960,Glyma07G30260,Glyma09G40150,Glyma08G06730,Glyma08G08550,Glyma18G08220,Glyma02G46670,Glyma14G05060,Glyma02G03760,Glyma08G06520,Glyma16G03780,Glyma09G38730,Glyma16G07060,Glyma03G29230,Glyma07G39300,Glyma05G02470,Glyma18G38470,Glyma06G40780,Glyma10G32800,Glyma04G27730,Glyma06G47870,Glyma11G19880,Glyma18G47590,Glyma07G04560,Glyma06G40110,Glyma06G08880,Glyma19G44690,Glyma13G02620,Glyma04G06610,Glyma18G50650,Glyma09G30070,Glyma10G08040,Glyma06G45340,Glyma20G30100,Glyma18G49060,Glyma08G18760,Glyma14G03040,Glyma16G33950,Glyma01G34780,Glyma18G47140,Glyma06G18700,Glyma20G27720,Glyma13G42950,Glyma18G50440,Glyma06G40710,Glyma06G40920,Glyma05G23260,Glyma18G46930,Glyma13G10530,Glyma05G01460,Glyma14G36960,Glyma18G51960,Glyma13G10040,Glyma17G04470,Glyma15G17430,Glyma09G13540,Glyma06G40740,Glyma15G42030,Glyma06G02010,Glyma09G26710,Glyma15G14030,Glyma09G05710,Glyma16G10080,Glyma07G31140,Glyma15G00670,Glyma17G09120,Glyma03G00540,Glyma18G04440,Glyma06G40980,Glyma03G05400,Glyma18G08870,Glyma07G12130,Glyma02G48100,Glyma12G34890,Glyma15G00340,Glyma10G32990,Glyma12G33340,Glyma06G40350,Glyma15G00950,Glyma18G10610,Glyma07G10460,Glyma14G29130,Glyma08G15360,Glyma15G37140,Glyma11G27200,Glyma13G10200,Glyma19G35270,Glyma11G05140,Glyma06G40670,Glyma04G01110,Glyma09G40650,Glyma18G51950,Glyma05G03440,Glyma15G04850,Glyma16G32710,Glyma16G10760,Glyma19G00650,Glyma18G42700,Glyma07G09530,Glyma04G34140,Glyma10G35610,Glyma10G02020,Glyma06G05910,Glyma03G32160,Glyma13G23610,Glyma13G26250,Glyma05G30030,Glyma13G00370,Glyma19G43290,Glyma03G37760,Glyma20G27660,Glyma17G30980,Glyma08G13060,Glyma17G34170,Glyma15G14210,Glyma12G17450,Glyma12G17360,Glyma19G34250,Glyma04G39670,Glyma03G42000,Glyma08G09540,Glyma10G04480,Glyma13G06490,Glyma11G34490,Glyma02G14310,Glyma20G27510,Glyma05G30260,Glyma10G35310,Glyma08G23150,Glyma09G37650,Glyma07G02940,Glyma14G38650,Glyma18G10470,Glyma12G36440,Glyma15G04280,Glyma08G08000,Glyma15G04350,Glyma19G04140,Glyma09G08180,Glyma08G05720,Glyma08G43170

GO:030554

adenyl  
nucleotide  
binding

355/169  
5

4155/  
27682

8.51E  
-12

Glyma13G41790,Glyma04G04510,Glyma04G09210,Glyma20G26160,Glyma14G36660,Glyma13G36600,Glyma18G00700,Glyma17G08610,Glyma19G39680,Glyma12G06530,Glyma07G08120,Glyma01G03410,Glyma09G30430,Glyma12G34330,Glyma10G30060,Glyma02G03070,Glyma13G26000,Glyma15G14020,Glyma11G15520,Glyma18G50510,Glyma13G18690,Glyma16G08560,Glyma12G08900,Glyma16G25010,Glyma0028S00210,Glyma17G34190,Glyma13G05430,Glyma18G01960,Glyma06G40690,Glyma09G03190,Glyma17G08540,Glyma17G01730,Glyma20G16170,Glyma11G20180,Glyma13G25420,Glyma07G07550,Glyma19G31720,Glyma13G23840,Glyma06G39990,Glyma13G17440,Glyma04G04380,Glyma05G34180,Glyma02G45800,Glyma08G03240,Glyma16G34030,Glyma17G10420,Glyma14G33400,Glyma02G11110,Glyma06G17560,Glyma18G07080,Glyma08G08500,Glyma13G21820,Glyma07G32200,Glyma13G35790,Glyma19G39580,Glyma06G41880,Glyma06G45590,Glyma19G41210,Glyma06G15900,Glyma18G48600,Glyma07G0710,Glyma05G33240,Glyma04G05920,Glyma13G21030,Glyma01G07970,Glyma06G21140,Glyma07G01890,Glyma02G47230,Glyma18G09670,Glyma16G24940,Glyma16G04910,Glyma15G36110,Glyma20G23010,Glyma18G11590,Glyma15G10370,Glyma15G14080,Glyma04G41060,Glyma08G09050,Glyma08G46130,Glyma05G32070,Glyma09G24410,Glyma18G50450,Glyma14G02740,Glyma06G41430,Glyma08G41510,Glyma18G40680,Glyma10G07500,Glyma05G27850,Glyma15G23150,Glyma05G30650,Glyma11G34210,Glyma17G34410,Glyma15G20000,Glyma04G01440,Glyma15G37390,Glyma11G19120,Glyma16G21050,Glyma06G08480,Glyma09G33120,Glyma18G09290,Glyma09G19730,Glyma14G04930,Glyma11G37910,Glyma20G37930,Glyma11G09060,Glyma18G16060,Glyma13G16540,Glyma09G34860,Glyma20G27860,Glyma18G15150,Glyma08G39070,Glyma08G12540,Glyma12G32880,Glyma03G05640,Glyma01G10100,Glyma14G06570,Glyma03G02310,Glyma15G02520,Glyma01G27440,Glyma11G04310,Glyma18G06990,Glyma03G0310,Glyma15G37320,Glyma15G13290,Glyma16G32640,Glyma12G17340,Glyma13G40550,Glyma13G06620,Glyma17G38210,Glyma15G34810,Glyma06G21910,Glyma07G09260,Glyma09G08370,Glyma13G25970,Glyma07G11880,Glyma08G13040,Glyma16G32700,Glyma13G38950,Glyma08G13150,Glyma18G45440,Glyma17G33470,Glyma06G47650,Glyma07G00670,Glyma20G38380,Glyma06G20360,Glyma20G34060,Glyma20G38610,Glyma16G02290,Glyma14G12710,Glyma01G42240,Glyma16G22370,Glyma02G09080,Glyma05G30800,Glyma16G27250,Glyma08G40030,Glyma18G52480,Glyma17G02080,Glyma03G33590,Glyma16G33590,Glyma03G36310,Glyma14G07750,Glyma02G40850,Glyma16G02340,Glyma10G38450,2.Glyma07G00340,Glyma11G09070,Glyma04G43190,Glyma19G31950,Glyma18G44800,Glyma15G14200,Glyma11G02150,Glyma18G50540,Glyma01G42770,Glyma05G21420,Glyma13G43480,Glyma17G09700,Glyma16G29040,Glyma18G09980,Glyma01G43190,Glyma02G06700,Glyma10G41990,Glyma12G16450,Glyma03G32530,Glyma14G00380,Glyma20G06780,Glyma01G41150,Glyma04G36240,Glyma14G10790,Glyma19G34960,Glyma20G29060,Glyma09G35140,Glyma16G32830,Glyma07G16260,Glyma08G44620,Glyma08G40920,Glyma06G20200,Glyma20G27790,Glyma09G05550,Glyma09G28260,Glyma09G02930,Glyma19G38970,Glyma20G27800,Glyma17G34060,Glyma15G37290,Glyma09G37580,Glyma20G35970,Glyma12G03140,Glyma03G04780,Glyma01G39380,Glyma10G38810,Glyma18G45200,Glyma18G53590,Glyma17G16070,Glyma02G46070,Glyma01G00960,Glyma07G30260,Glyma09G40150,Glyma08G06730,Glyma08G08550,Glyma18G08220,Glyma02G46670,Glyma14G05060,Glyma02G03760,Glyma08G06520,Glyma16G03780,Glyma09G38730,Glyma16G07060,Glyma03G29230,Glyma07G39300,Glyma05G02470,Glyma18G38470,Glyma06G40780,Glyma10G32800,Glyma04G27730,Glyma06G47870,Glyma11G19880,Glyma18G47590,Glyma07G04560,Glyma06G40110,Glyma06G08880,Glyma19G44690,Glyma13G02620,Glyma04G06610,Glyma18G50650,Glyma09G30070,Glyma10G08040,Glyma06G45340,Glyma20G30100,Glyma18G49060,Glyma08G18760,Glyma14G03040,Glyma16G33950,Glyma01G34780,Glyma18G47140,Glyma06G18700,Glyma20G27720,Glyma13G42950,Glyma18G50440,Glyma06G40710,Glyma06G40920,Glyma05G23260,Glyma18G46930,Glyma13G10530,Glyma05G01460,Glyma14G36960,Glyma18G51960,Glyma13G10040,Glyma17G04470,Glyma15G17430,Glyma09G13540,Glyma06G40740,Glyma15G42030,Glyma06G02010,Glyma09G26710,Glyma15G14030,Glyma09G05710,Glyma16G10080,Glyma07G31140,Glyma15G00670,Glyma17G09120,Glyma03G00540,Glyma18G04440,Glyma06G40980,Glyma03G05400,Glyma18G08870,Glyma07G12130,Glyma02G48100,Glyma12G34890,Glyma15G00340,Glyma10G32990,Glyma12G33340,Glyma06G40350,Glyma15G00950,Glyma18G10610,Glyma07G10460,Glyma14G29130,Glyma08G15360,Glyma15G37140,Glyma11G27200,Glyma13G10200,Glyma19G35270,Glyma11G05140,Glyma06G40670,Glyma04G01110,Glyma09G40650,Glyma18G51950,Glyma05G03440,Glyma15G04850,Glyma16G32710,Glyma16G10760,Glyma19G00650,Glyma18G42700,Glyma07G09530,Glyma04G34140,Glyma10G35610,Glyma10G02020,Glyma06G05910,Glyma03G32160,Glyma13G23610,Glyma13G26250,Glyma05G30030,Glyma13G00370,Glyma19G43290,Glyma03G37760,Glyma20G27660,Glyma17G30980,Glyma08G13060,Glyma17G34170,Glyma15G14210,Glyma12G17450,Glyma12G17360,Glyma19G34250,Glyma04G39670,Glyma03G42000,Glyma08G09540,Glyma10G04480,Glyma13G06490,Glyma11G34490,Glyma02G14310,Glyma20G27510,Glyma05G30260,Glyma10G35310,Glyma08G23150,Glyma09G37650,Glyma07G02940,Glyma14G38650,Glyma18G10470,Glyma12G36440,Glyma15G04280,Glyma08G08000,Glyma15G04350,Glyma19G04140,Glyma09G08180,Glyma08G05720,Glyma08G43170

GO:001883

purine  
nucleoside  
binding

355/169  
5

4155/  
27682

8.51E  
-12

Glyma13G41790,Glyma04G04510,Glyma04G09210,Glyma20G26160,Glyma14G36660,Glyma13G36600,Glyma18G00700,Glyma17G08610,Glyma19G39680,Glyma12G06530,Glyma07G08120,Glyma01G03410,Glyma09G30430,Glyma12G34330,Glyma10G30060,Glyma02G03070,Glyma13G26000,Glyma15G14020,Glyma11G15520,Glyma18G50510,Glyma13G18690,Glyma16G08560,Glyma12G08900,Glyma16G25010,Glyma0028S00210,Glyma17G34190,Glyma13G05430,Glyma18G01960,Glyma06G40690,Glyma09G03190,Glyma17G08540,Glyma17G01730,Glyma20G16170,Glyma11G20180,Glyma13G25420,Glyma07G07550,Glyma19G31720,Glyma13G23840,Glyma06G39990,Glyma13G17440,Glyma04G04380,Glyma05G34180,Glyma02G45800,Glyma08G03240,Glyma16G34030,Glyma17G10420,Glyma14G33400,Glyma02G11110,Glyma06G17560,Glyma18G07080,Glyma08G08500,Glyma13G21820,Glyma07G32200,Glyma13G35790,Glyma19G39580,Glyma06G41880,Glyma06G45590,Glyma19G41210,Glyma06G15900,Glyma18G48600,Glyma07G0710,Glyma05G33240,Glyma04G05920,Glyma13G21030,Glyma01G07970,Glyma06G21140,Glyma07G01890,Glyma02G47230,Glyma18G09670,Glyma16G24940,Glyma16G04910,Glyma15G36110,Glyma20G23010,Glyma18G11590,Glyma15G10370,Glyma15G14080,Glyma04G41060,Glyma08G09050,Glyma08G46130,Glyma05G32070,Glyma09G24410,Glyma18G50450,Glyma14G02740,Glyma06G41430,Glyma08G41510,Glyma18G40680,Glyma10G07500,Glyma05G27850,Glyma15G23150,Glyma05G30650,Glyma11G34210,Glyma17G34410,Glyma15G20000,Glyma04G01440,Glyma15G37390,Glyma11G19120,Glyma16G21050,Glyma06G08480,Glyma09G33120,Glyma18G09290,Glyma09G19730,Glyma14G04930,Glyma11G37910,Glyma20G37930,Glyma11G09060,Glyma18G16060,Glyma13G16540,Glyma09G34860,Glyma20G27860,Glyma18G15150,Glyma08G39070,Glyma08G12540,Glyma12G32880,Glyma03G05640,Glyma01G10100,Glyma14G06570,Glyma03G02310,Glyma15G02520,Glyma01G27440,Glyma11G04310,Glyma18G06990,Glyma03G0310,Glyma15G37320,Glyma15G13290,Glyma16G32640,Glyma12G17340,Glyma13G40550,Glyma13G06620,Glyma17G38210,Glyma15G34810,Glyma06G21910,Glyma07G09260,Glyma09G08370,Glyma13G25970,Glyma07G11880,Glyma08G13040,Glyma16G32700,Glyma13G38950,Glyma08G13150,Glyma18G45440,Glyma17G33470,Glyma06G47650,Glyma07G00670,Glyma20G38380,Glyma06G20360,Glyma20G34060,Glyma20G38610,Glyma16G02290,Glyma14G12710,Glyma01G42240,Glyma16G22370,Glyma02G09080,Glyma05G30800,Glyma16G27250,Glyma08G40030,Glyma18G52480,Glyma17G02080,Glyma03G33590,Glyma16G33590,Glyma03G36310,Glyma14G07750,Glyma02G40850,Glyma16G02340,Glyma10G38450,2,Glyma07G00340,Glyma11G09070,Glyma04G43190,Glyma19G31950,Glyma18G44800,Glyma15G14200,Glyma11G02150,Glyma18G50540,Glyma01G42770,Glyma05G21420,Glyma13G43480,Glyma17G09700,Glyma16G29040,Glyma18G09980,Glyma01G43190,Glyma02G06700,Glyma10G41990,Glyma12G16450,Glyma03G32530,Glyma14G00380,Glyma20G06780,Glyma01G41150,Glyma04G36240,Glyma14G10790,Glyma19G34960,Glyma20G29060,Glyma09G35140,Glyma16G32830,Glyma07G16260,Glyma08G44620,Glyma08G40920,Glyma06G20200,Glyma20G27790,Glyma09G05550,Glyma09G28260,Glyma09G02930,Glyma19G38970,Glyma20G27800,Glyma17G34060,Glyma15G37290,Glyma09G37580,Glyma20G35970,Glyma12G03140,Glyma03G04780,Glyma01G39380,Glyma10G38810,Glyma18G45200,Glyma18G53590,Glyma17G16070,Glyma02G46070,Glyma01G00960,Glyma07G30260,Glyma09G40150,Glyma08G06730,Glyma08G08550,Glyma18G08220,Glyma02G46670,Glyma14G05060,Glyma02G03760,Glyma08G06520,Glyma16G03780,Glyma09G38730,Glyma16G07060,Glyma03G29230,Glyma07G39300,Glyma05G02470,Glyma18G38470,Glyma06G40780,Glyma10G32800,Glyma04G27730,Glyma06G47870,Glyma11G19880,Glyma18G47590,Glyma07G04560,Glyma06G40110,Glyma06G08880,Glyma19G44690,Glyma13G02620,Glyma04G06610,Glyma18G50650,Glyma09G30070,Glyma10G08040,Glyma06G45340,Glyma20G30100,Glyma18G49060,Glyma08G18760,Glyma14G03040,Glyma16G33950,Glyma01G34780,Glyma18G47140,Glyma06G18700,Glyma20G27720,Glyma13G42950,Glyma18G50440,Glyma06G40710,Glyma06G40920,Glyma05G23260,Glyma18G46930,Glyma13G10530,Glyma05G01460,Glyma14G36960,Glyma18G51960,Glyma13G10040,Glyma17G04470,Glyma15G17430,Glyma09G13540,Glyma06G40740,Glyma15G42030,Glyma06G02010,Glyma09G26710,Glyma15G14030,Glyma09G05710,Glyma16G10080,Glyma07G31140,Glyma15G00670,Glyma17G09120,Glyma03G00540,Glyma18G04440,Glyma06G40980,Glyma03G05400,Glyma18G08870,Glyma07G12130,Glyma02G48100,Glyma12G34890,Glyma15G00340,Glyma10G32990,Glyma12G33340,Glyma06G40350,Glyma15G00950,Glyma18G10610,Glyma07G10460,Glyma14G29130,Glyma08G15360,Glyma15G37140,Glyma11G27200,Glyma13G10200,Glyma19G35270,Glyma11G05140,Glyma06G40670,Glyma04G01110,Glyma09G40650,Glyma18G51950,Glyma05G03440,Glyma15G04850,Glyma16G32710,Glyma16G10760,Glyma19G00650,Glyma18G42700,Glyma07G09530,Glyma04G34140,Glyma10G35610,Glyma10G02020,Glyma06G05910,Glyma03G32160,Glyma13G23610,Glyma13G26250,Glyma05G30030,Glyma13G00370,Glyma19G43290,Glyma03G37760,Glyma20G27660,Glyma17G30980,Glyma08G13060,Glyma17G34170,Glyma15G14210,Glyma12G17450,Glyma12G17360,Glyma19G34250,Glyma04G39670,Glyma03G42000,Glyma08G09540,Glyma10G04480,Glyma13G06490,Glyma11G34490,Glyma02G14310,Glyma20G27510,Glyma05G30260,Glyma10G35310,Glyma08G23150,Glyma09G37650,Glyma07G02940,Glyma14G38650,Glyma18G10470,Glyma12G36440,Glyma15G04280,Glyma08G08000,Glyma15G04350,Glyma19G04140,Glyma09G08180,Glyma08G05720,Glyma08G43170

GO:000166

nucleotide  
binding

399/169  
5

4791/  
27682

9.81E  
-12

Glyma13G41790,Glyma04G04510,Glyma18G00700,Glyma17G08610,Glyma04G38360,Glyma16G09890,Glyma06G07410,Glyma08G06570,Glyma02G03070,Glyma13G26000,Glyma06G16700,Glyma11G15520,Glyma12G08900,Glyma0028S00210,Glyma05G34540,Glyma17G08540,Glyma17G01730,Glyma20G16170,Glyma13G25420,Glyma19G31720,Glyma14G36420,Glyma13G23840,Glyma04G04380,Glyma05G34180,Glyma08G03240,Glyma14G33400,Glyma14G05020,Glyma06G17560,Glyma18G07080,Glyma13G21820,Glyma06G41880,Glyma13G35790,Glyma06G45590,Glyma18G48600,Glyma05G33240,Glyma04G05920,Glyma13G21030,Glyma01G07970,Glyma02G47230,Glyma18G09670,Glyma16G04910,Glyma16G24940,Glyma15G36110,Glyma20G23010,Glyma15G10370,Glyma18G11590,Glyma11G13120,Glyma08G46130,Glyma18G50450,Glyma04G07370,Glyma06G41430,Glyma18G40680,Glyma02G38280,Glyma05G30650,Glyma15G37390,Glyma11G19120,Glyma06G08480,Glyma11G37910,Glyma11G09060,Glyma09G34860,Glyma20G27860,Glyma08G12540,Glyma01G10100,Glyma14G06570,Glyma15G02520,Glyma11G04310,Glyma15G37320,Glyma16G32640,Glyma12G17340,Glyma13G40550,Glyma09G08370,Glyma07G09260,Glyma06G21910,Glyma14G40380,Glyma13G38950,Glyma18G45440,Glyma08G13150,Glyma17G33470,Glyma07G00670,Glyma06G20360,Glyma20G38610,Glyma16G02290,Glyma14G12710,Glyma16G22370,Glyma02G09080,Glyma08G40030,Glyma18G52480,Glyma03G33590,Glyma02G16630,Glyma03G36310,Glyma02G40850,Glyma16G02340,Glyma10G38450.2,Glyma11G09070,Glyma04G43190,Glyma19G31950,Glyma18G44800,Glyma15G14200,Glyma01G42770,Glyma05G21420,Glyma14G00380,Glyma03G32530,Glyma19G34960,Glyma20G29060,Glyma13G25570,Glyma08G40920,Glyma09G05550,Glyma09G28260,Glyma19G38970,Glyma09G37580,Glyma12G03140,Glyma03G04780,Glyma01G39380,Glyma10G38810,Glyma02G46070,Glyma07G30260,Glyma08G06730,Glyma08G08550,Glyma02G46670,Glyma14G05060,Glyma08G06520,Glyma16G03780,Glyma09G38730,Glyma16G07060,Glyma10G32800,Glyma04G27730,Glyma07G04560,Glyma18G47590,Glyma06G08880,Glyma06G40110,Glyma13G02620,Glyma19G44690,Glyma15G07040,Glyma18G50650,Glyma06G45340,Glyma10G08040,Glyma08G18760,Glyma11G04350,Glyma16G33950,Glyma14G03040,Glyma01G34780,Glyma06G18700,Glyma17G01310,Glyma20G27720,Glyma18G50440,Glyma13G36900,Glyma18G46930,Glyma19G38110,Glyma13G10530,Glyma05G01460,Glyma14G36960,Glyma12G34500,Glyma18G51960,Glyma17G04470,Glyma13G10040,Glyma15G17430,Glyma15G42030,Glyma09G26710,Glyma15G14030,Glyma09G05710,Glyma18G04440,Glyma06G40980,Glyma03G05400,Glyma07G30750,Glyma07G12130,Glyma12G33340,Glyma15G00950,Glyma13G32300,Glyma15G37140,Glyma11G27200,Glyma13G10200,Glyma06G40670,Glyma04G01110,Glyma18G51950,Glyma09G40650,Glyma15G04850,Glyma16G32710,Glyma16G10760,Glyma04G34140,Glyma10G35610,Glyma10G02020,Glyma13G26250,Glyma05G30030,Glyma13G00370,Glyma19G43290,Glyma08G05120,Glyma12G17360,Glyma04G39670,Glyma02G14310,Glyma11G34490,Glyma13G06490,Glyma20G27510,Glyma08G23150,Glyma05G31810,Glyma09G37650,Glyma12G36440,Glyma08G08000,Glyma09G08180,Glyma04G09210,Glyma20G26160,Glyma14G36660,Glyma13G36600,Glyma10G03170,Glyma13G24260,Glyma19G39680,Glyma12G06530,Glyma07G08120,Glyma01G03410,Glyma09G30430,Glyma12G34330,Glyma10G30060,Glyma15G14020,Glyma06G19630,Glyma13G18690,Glyma18G50510,Glyma16G08560,Glyma16G25010,Glyma17G34190,Glyma13G05430,Glyma06G40690,Glyma18G01960,Glyma02G10710,Glyma09G03190,Glyma11G20180,Glyma07G07550,Glyma06G39990,Glyma13G17440,Glyma02G45800,Glyma16G34030,Glyma17G10420,Glyma02G11110,Glyma08G08500,Glyma19G39580,Glyma07G32200,Glyma06G15900,Glyma19G41210,Glyma07G07110,Glyma07G01890,Glyma06G21140,Glyma12G01380,Glyma15G14080,Glyma04G41060,Glyma08G09050,Glyma05G32070,Glyma09G24410,Glyma14G02740,Glyma05G33830,Glyma08G41510,Glyma10G07500,Glyma05G27850,Glyma15G23150,Glyma11G34210,Glyma17G34410,Glyma04G01440,Glyma15G20000,Glyma16G21050,Glyma09G33120,Glyma09G19730,Glyma18G09290,Glyma14G04930,Glyma20G37930,Glyma18G16060,Glyma13G16540,Glyma19G07410,Glyma18G15150,Glyma12G32880,Glyma08G39070,Glyma03G05640,Glyma03G02310,Glyma01G27440,Glyma18G06990,Glyma03G30310,Glyma12G09220,Glyma15G13290,Glyma04G35110,Glyma17G38210,Glyma13G06620,Glyma13G25970,Glyma15G34810,Glyma07G11880,Glyma08G13040,Glyma16G32700,Glyma06G47650,Glyma08G21530,Glyma20G38380,Glyma20G34060,Glyma20G29840,Glyma07G29630,Glyma05G08770,Glyma01G42240,Glyma05G30800,Glyma16G27250,Glyma17G02080,Glyma16G33590,Glyma08G16680,Glyma14G07750,Glyma07G00340,Glyma11G02150,Glyma18G50540,Glyma13G43480,Glyma17G09700,Glyma16G29040,Glyma18G09980,Glyma01G43190,Glyma02G06700,Glyma12G16450,Glyma10G41990,Glyma01G41150,Glyma20G06780,Glyma14G10790,Glyma04G36240,Glyma09G35140,Glyma16G32830,Glyma07G16260,Glyma08G44620,Glyma06G20200,Glyma20G27790,Glyma09G02930,Glyma20G27800,Glyma17G34060,Glyma15G37290,Glyma09G02960,Glyma20G35970,Glyma18G45200,Glyma18G53590,Glyma17G16070,Glyma01G00960,Glyma09G40150,Glyma18G08220,Glyma02G03760,Glyma17G03980,Glyma03G29230,Glyma07G39300,Glyma05G02470,Glyma18G38470,Glyma06G40780,Glyma18G52110,Glyma06G47870,Glyma11G19880,Glyma04G06610,Glyma09G30070,Glyma20G30100,Glyma18G49060,Glyma18G47140,Glyma13G42950,Glyma06G40710,Glyma06G40920,Glyma05G23260,Glyma09G13540,Glyma06G40740,Glyma06G02010,Glyma15G00670,Glyma07G31140,Glyma16G10080,Glyma17G09120,Glyma03G00540,Glyma18G08870,Glyma02G48100,Glyma12G34890,Glyma15G00340,Glyma10G32990,Glyma06G40350,Glyma18G10610,Glyma08G15360,Glyma14G29130,Glyma07G10460,Glyma19G35270,Glyma11G05140,Glyma05G03440,Glyma05G35800,Glyma19G00650,Glyma07G09530,Glyma18G42700,Glyma06G065910,Glyma03G32160,Glyma13G23610,Glyma03G37760,Glyma20G27660,Glyma16G27030,Glyma17G30980,Glyma08G13060,Glyma17G34170,Glyma15G14210,Glyma12G17450,Glyma19G34250,Glyma16G08460,Glyma03G42000,Glyma08G09540,Glyma10G04480,Glyma05G30260,Glyma10G35310,Glyma07G02940,Glyma14G38650,Glyma18G10470,Glyma15G04280,Glyma15G04350,Glyma19G04140,Glyma08G05720,Glyma08G43170

|           |                               |              |                |              |                                                                                                                                                                                                                                                                                                                                                                                                                                                                                                                                                                                                                                                                                                                                                                                                                                                                                                                                                                                                                                                                                                                                                                                                                                                                                                                                                                                                                                                                                                                                                                                                                                                                                                                                                                                                                                                                                                                                                                                                                                                                                                                                                                                                                                                                                                                                                                                                                                                                                                                                                                                                                                                                                                                                                                                                                                                                                                                                                                                                                                                                                                                                                                                                                                                                                                                                                                                                                                                                                                                                                                                                                                                                                                                                                                                                                                                                                                                                                                                                                                                                                                                                                                                                                                                                                                                                                                                                                                                                                                                                                                                                                                                                                                                                                                                                                                                                                                                                                                                                                                                                                                                                                                                                                                                                                   |
|-----------|-------------------------------|--------------|----------------|--------------|-----------------------------------------------------------------------------------------------------------------------------------------------------------------------------------------------------------------------------------------------------------------------------------------------------------------------------------------------------------------------------------------------------------------------------------------------------------------------------------------------------------------------------------------------------------------------------------------------------------------------------------------------------------------------------------------------------------------------------------------------------------------------------------------------------------------------------------------------------------------------------------------------------------------------------------------------------------------------------------------------------------------------------------------------------------------------------------------------------------------------------------------------------------------------------------------------------------------------------------------------------------------------------------------------------------------------------------------------------------------------------------------------------------------------------------------------------------------------------------------------------------------------------------------------------------------------------------------------------------------------------------------------------------------------------------------------------------------------------------------------------------------------------------------------------------------------------------------------------------------------------------------------------------------------------------------------------------------------------------------------------------------------------------------------------------------------------------------------------------------------------------------------------------------------------------------------------------------------------------------------------------------------------------------------------------------------------------------------------------------------------------------------------------------------------------------------------------------------------------------------------------------------------------------------------------------------------------------------------------------------------------------------------------------------------------------------------------------------------------------------------------------------------------------------------------------------------------------------------------------------------------------------------------------------------------------------------------------------------------------------------------------------------------------------------------------------------------------------------------------------------------------------------------------------------------------------------------------------------------------------------------------------------------------------------------------------------------------------------------------------------------------------------------------------------------------------------------------------------------------------------------------------------------------------------------------------------------------------------------------------------------------------------------------------------------------------------------------------------------------------------------------------------------------------------------------------------------------------------------------------------------------------------------------------------------------------------------------------------------------------------------------------------------------------------------------------------------------------------------------------------------------------------------------------------------------------------------------------------------------------------------------------------------------------------------------------------------------------------------------------------------------------------------------------------------------------------------------------------------------------------------------------------------------------------------------------------------------------------------------------------------------------------------------------------------------------------------------------------------------------------------------------------------------------------------------------------------------------------------------------------------------------------------------------------------------------------------------------------------------------------------------------------------------------------------------------------------------------------------------------------------------------------------------------------------------------------------------------------------------------------------------------------------|
| GO:032555 | purine ribonucleotide binding | 363/169<br>5 | 4325/<br>27682 | 4.61E<br>-11 | Glyma13G41790,Glyma04G04510,Glyma04G09210,Glyma20G26160,Glyma14G36660,Glyma13G36600,Glyma10G03170,Glyma18G00700,Glyma19G39680,Glyma04G38360,Glyma13G24260,Glyma12G06530,Glyma06G07410,Glyma07G08120,Glyma01G03410,Glyma09G30430,Glyma12G34330,Glyma10G30060,Glyma02G03070,Glyma06G16700,Glyma13G26000,Glyma06G19630,Glyma11G15520,Glyma18G50510,Glyma13G18690,Glyma16G08560,Glyma12G08900,Glyma16G25010,Glyma0028S00210,Glyma17G34190,Glyma13G05430,Glyma18G01960,Glyma06G40690,Glyma05G34540,Glyma09G03190,Glyma17G08540,Glyma17G01730,Glyma20G16170,Glyma11G20180,Glyma13G25420,Glyma07G07550,Glyma19G31720,Glyma13G23840,Glyma06G39990,Glyma13G17440,Glyma04G04380,Glyma05G34180,Glyma02G45800,Glyma08G03240,Glyma16G34030,Glyma17G10420,Glyma14G33400,Glyma02G11110,Glyma06G17560,Glyma18G07080,Glyma13G21820,Glyma07G32200,Glyma13G35790,Glyma19G39580,Glyma06G41880,Glyma06G45590,Glyma19G41210,Glyma06G15900,Glyma18G48600,Glyma07G07110,Glyma05G33240,Glyma04G05920,Glyma13G21030,Glyma01G07970,Glyma06G21140,Glyma07G01890,Glyma02G47230,Glyma18G09670,Glyma16G24940,Glyma16G04910,Glyma15G36110,Glyma20G23010,Glyma18G11590,Glyma15G10370,Glyma04G41060,Glyma08G09050,Glyma08G46130,Glyma05G32070,Glyma09G24410,Glyma18G50450,Glyma04G07370,Glyma14G02740,Glyma06G41430,Glyma08G41510,Glyma05G33830,Glyma18G40680,Glyma10G07500,Glyma05G27850,Glyma05G30650,Glyma11G34210,Glyma17G34410,Glyma15G20000,Glyma04G01440,Glyma15G37390,Glyma11G19120,Glyma16G21050,Glyma06G08480,Glyma09G33120,Glyma18G09290,Glyma09G19730,Glyma14G04930,Glyma11G37910,Glyma20G37930,Glyma11G09060,Glyma18G16060,Glyma13G16540,Glyma09G34860,Glyma20G27860,Glyma18G15150,Glyma08G39070,Glyma08G12540,Glyma12G32880,Glyma03G05640,Glyma01G10100,Glyma14G06570,Glyma03G02310,Glyma15G02520,Glyma01G27440,Glyma11G04310,Glyma18G06990,Glyma03G30310,Glyma15G37320,Glyma15G13290,Glyma16G32640,Glyma12G17340,Glyma13G40550,Glyma04G35110,Glyma13G06620,Glyma17G38210,Glyma15G34810,Glyma06G21910,Glyma07G09260,Glyma09G08370,Glyma13G25970,Glyma07G11880,Glyma14G40380,Glyma08G13040,Glyma16G32700,Glyma13G38950,Glyma08G13150,Glyma18G45440,Glyma17G33470,Glyma06G47650,Glyma07G00670,Glyma20G38380,Glyma06G20360,Glyma20G34060,Glyma20G29840,Glyma20G38610,Glyma16G02290,Glyma14G12710,Glyma01G42240,Glyma16G22370,Glyma02G09080,Glyma05G30800,Glyma16G27250,Glyma08G40030,Glyma18G52480,Glyma17G02080,Glyma03G33590,Glyma02G16630,Glyma16G33590,Glyma03G36310,Glyma14G07750,Glyma08G16680,Glyma02G40850,Glyma16G02340,Glyma10G38450.2,Glyma07G00340,Glyma11G09070,Glyma04G43190,Glyma19G31950,Glyma18G44800,Glyma11G02150,Glyma18G50540,Glyma01G42770,Glyma05G21420,Glyma13G43480,Glyma17G09700,Glyma16G29040,Glyma18G09980,Glyma02G06700,Glyma10G41990,Glyma12G16450,Glyma03G32530,Glyma14G00380,Glyma20G06780,Glyma01G41150,Glyma04G36240,Glyma14G10790,Glyma20G29060,Glyma09G35140,Glyma16G32830,Glyma07G16260,Glyma08G44620,Glyma08G40920,Glyma06G20200,Glyma20G27790,Glyma09G05550,Glyma09G28260,Glyma09G02930,Glyma19G38970,Glyma20G27800,Glyma17G34060,Glyma15G37290,Glyma09G37580,Glyma20G35970,Glyma12G03140,Glyma03G04780,Glyma01G39380,Glyma10G38810,Glyma18G45200,Glyma18G53590,Glyma17G16070,Glyma02G46070,Glyma01G00960,Glyma07G30260,Glyma09G40150,Glyma08G06730,Glyma18G08220,Glyma02G46670,Glyma14G05060,Glyma02G03760,Glyma08G06520,Glyma16G03780,Glyma09G38730,Glyma16G07060,Glyma03G29230,Glyma07G39300,Glyma05G02470,Glyma18G38470,Glyma06G40780,Glyma10G32800,Glyma04G27730,Glyma06G47870,Glyma11G19880,Glyma18G47590,Glyma07G04560,Glyma06G40110,Glyma06G08880,Glyma19G44690,Glyma13G02620,Glyma04G06610,Glyma18G50650,Glyma09G30070,Glyma10G08040,Glyma20G30100,Glyma18G49060,Glyma11G04350,Glyma08G18760,Glyma14G03040,Glyma16G33950,Glyma01G34780,Glyma18G47140,Glyma06G18700,Glyma20G27720,Glyma17G01310,Glyma13G42950,Glyma18G50440,Glyma06G40710,Glyma13G36900,Glyma06G40920,Glyma05G23260,Glyma18G46930,Glyma19G38110,Glyma13G10530,Glyma05G01460,Glyma14G36960,Glyma18G51960,Glyma13G10040,Glyma15G17430,Glyma09G13540,Glyma06G40740,Glyma15G42030,Glyma06G02010,Glyma09G26710,Glyma09G05710,Glyma16G10080,Glyma07G31140,Glyma15G00670,Glyma17G09120,Glyma03G00540,Glyma18G04440,Glyma06G40980,Glyma03G05400,Glyma18G08870,Glyma07G12130,Glyma02G48100,Glyma12G34890,Glyma15G00340,Glyma10G32990,Glyma12G33340,Glyma06G40350,Glyma15G00950,Glyma18G10610,Glyma07G10460,Glyma14G29130,Glyma08G15360,Glyma15G37140,Glyma11G27200,Glyma13G10200,Glyma19G35270,Glyma11G05140,Glyma06G40670,Glyma04G01110,Glyma09G40650,Glyma18G51950,Glyma05G03440,Glyma15G04850,Glyma16G32710,Glyma16G10760,Glyma19G00650,Glyma18G42700,Glyma07G09530,Glyma04G34140,Glyma10G35610,Glyma10G02020,Glyma06G05910,Glyma03G32160,Glyma13G23610,Glyma13G26250,Glyma05G30030,Glyma13G00370,Glyma19G43290,Glyma03G37760,Glyma20G27660,Glyma16G27030,Glyma08G05120,Glyma17G30980,Glyma08G13060,Glyma17G34170,Glyma12G17450,Glyma12G17360,Glyma19G34250,Glyma04G39670,Glyma03G42000,Glyma10G04480,Glyma13G06490,Glyma11G34490,Glyma02G14310,Glyma20G27510,Glyma05G30260,Glyma10G35310,Glyma05G31810,Glyma08G23150,Glyma09G37650,Glyma13G0702940,Glyma14G38650,Glyma18G10470,Glyma12G36440,Glyma15G04280,Glyma08G08000,Glyma15G04350,Glyma19G04140,Glyma09G08180,Glyma08G05720,Glyma08G43170 |
| GO:032553 | ribonucleotide binding        | 363/169<br>5 | 4325/<br>27682 | 4.61E<br>-11 | Glyma13G41790,Glyma04G04510,Glyma04G09210,Glyma20G26160,Glyma14G36660,Glyma13G36600,Glyma10G03170,Glyma18G00700,Glyma19G39680,Glyma04G38360,Glyma13G24260,Glyma12G06530,Glyma06G07410,Glyma07G08120,Glyma01G03410,Glyma09G30430,Glyma12G34330,Glyma10G30060,Glyma02G03070,Glyma06G16700,Glyma13G26000,Glyma06G19630,Glyma11G15520,Glyma18G50510,Glyma13G18690,Glyma16G08560,Glyma12G08900,Glyma16G25010,Glyma0028S00210,Glyma17G34190,Glyma13G05430,Glyma18G01960,Glyma06G40690,Glyma05G34540,Glyma09G03190,Glyma17G08540,Glyma17G01730,Glyma20G16170,Glyma11G20180,Glyma13G25420,Glyma07G07550,Glyma19G31720,Glyma13G23840,Glyma06G39990,Glyma13G17440,Glyma04G04380,Glyma05G34180,Glyma02G45800,Glyma08G03240,Glyma16G34030,Glyma17G10420,Glyma14G33400,Glyma02G11110,Glyma06G17560,Glyma18G07080,Glyma13G21820,Glyma07G32200,Glyma13G35790,Glyma19G39580,Glyma06G41880,Glyma06G45590,Glyma19G41210,Glyma06G15900,Glyma18G48600,Glyma07G07110,Glyma05G33240,Glyma04G05920,Glyma13G21030,Glyma01G07970,Glyma06G21140,Glyma07G01890,Glyma02G47230,Glyma18G09670,Glyma16G24940,Glyma16G04910,Glyma15G36110,Glyma20G23010,Glyma18G11590,Glyma15G10370,Glyma04G41060,Glyma08G09050,Glyma08G46130,Glyma05G32070,Glyma09G24410,Glyma18G50450,Glyma04G07370,Glyma14G02740,Glyma06G41430,Glyma08G41510,Glyma05G33830,Glyma18G40680,Glyma10G07500,Glyma05G27850,Glyma05G30650,Glyma11G34210,Glyma17G34410,Glyma15G20000,Glyma04G01440,Glyma15G37390,Glyma11G19120,Glyma16G21050,Glyma06G08480,Glyma09G33120,Glyma18G09290,Glyma09G19730,Glyma14G04930,Glyma11G37910,Glyma20G37930,Glyma11G09060,Glyma18G16060,Glyma13G16540,Glyma09G34860,Glyma20G27860,Glyma18G15150,Glyma08G39070,Glyma08G12540,Glyma12G32880,Glyma03G05640,Glyma01G10100,Glyma14G06570,Glyma03G02310,Glyma15G02520,Glyma01G27440,Glyma11G04310,Glyma18G06990,Glyma03G30310,Glyma15G37320,Glyma15G13290,Glyma16G32640,Glyma12G17340,Glyma13G40550,Glyma04G35110,Glyma13G06620,Glyma17G38210,Glyma15G34810,Glyma06G21910,Glyma07G09260,Glyma09G08370,Glyma13G25970,G                                                                                                                                                                                                                                                                                                                                                                                                                                                                                                                                                                                                                                                                                                                                                                                                                                                                                                                                                                                                                                                                                                                                                                                                                                                                                                                                                                                                                                                                                                                                                                                                                                                                                                                                                                                                                                                                                                                                                                                                                                                                                                                                                                                                                                                                                                                                                                                                                                                                                                                                                                                                                                                                                                                                                                                                                                                                                                                                                                                                                                                                                                                                                                                                                                                     |



ma05G23260,Glyma18G46930,Glyma19G38110,Glyma13G10530,Glyma05G01460,Glyma14G36960,Glyma18G51960,Glyma13G10040,Glyma17G04470,Glyma15G17430,Glyma09G13540,Glyma06G40740,Glyma15G42030,Glyma06G02010,Glyma09G26710,Glyma15G14030,Glyma09G05710,Glyma16G10080,Glyma07G31140,Glyma15G00670,Glyma17G09120,Glyma03G00540,Glyma18G04440,Glyma06G40980,Glyma03G05400,Glyma18G08870,Glyma07G12130,Glyma02G48100,Glyma12G34890,Glyma15G00340,Glyma10G32990,Glyma12G33340,Glyma06G40350,Glyma15G00950,Glyma18G10610,Glyma07G10460,Glyma14G29130,Glyma08G15360,Glyma15G37140,Glyma11G27200,Glyma13G10200,Glyma19G35270,Glyma11G05140,Glyma06G40670,Glyma04G01110,Glyma09G40650,Glyma18G51950,Glyma05G03440,Glyma15G04850,Glyma16G32710,Glyma16G10760,Glyma19G00650,Glyma18G42700,Glyma07G09530,Glyma04G34140,Glyma10G35610,Glyma10G02020,Glyma06G05910,Glyma03G32160,Glyma13G23610,Glyma13G26250,Glyma05G30030,Glyma13G00370,Glyma19G43290,Glyma03G37760,Glyma20G27660,Glyma16G27030,Glyma08G05120,Glyma17G30980,Glyma08G13060,Glyma17G34170,Glyma15G14210,Glyma12G17450,Glyma12G17360,Glyma19G34250,Glyma04G39670,Glyma03G42000,Glyma08G09540,Glyma10G04480,Glyma13G06490,Glyma11G34490,Glyma02G14310,Glyma20G27510,Glyma05G30260,Glyma10G35310,Glyma05G31810,Glyma08G23150,Glyma09G37650,Glyma07G02940,Glyma14G38650,Glyma18G10470,Glyma12G36440,Glyma15G04280,Glyma08G08000,Glyma15G04350,Glyma19G04140,Glyma09G08180,Glyma08G05720,Glyma08G43170

Glyma01G37920,Glyma19G41590,Glyma17G09860,Glyma17G08610,Glyma04G38360,Glyma08G06570,Glyma11G10320,Glyma14G37070,Glyma16G24640,Glyma10G41590,Glyma14G04850,Glyma02G03070,Glyma17G04800,Glyma06G16700,Glyma11G15520,Glyma09G02490,Glyma06G08730,Glyma09G32180,Glyma13G26260,Glyma12G08900,Glyma02G08970,Glyma0028S00210,Glyma18G10220,Glyma18G49000,Glyma06G18970,Glyma11G08560,Glyma11G13480,Glyma12G14230,Glyma20G00270,Glyma01G27810,Glyma17G08540,Glyma15G09700,Glyma17G01730,Glyma17G11620,Glyma05G35930,Glyma06G39750,Glyma19G31720,Glyma14G36420,Glyma13G23840,Glyma13G23840,Glyma18G49880,Glyma04G04380,Glyma05G25550,Glyma08G03240,Glyma18G07080,Glyma13G21820,Glyma14G09510,Glyma07G18500,Glyma05G33240,Glyma04G05920,Glyma10G36320,Glyma02G47230,Glyma15G05680,Glyma07G15500,Glyma02G43200,Glyma02G12030,Glyma20G06680,Glyma15G36110,Glyma20G23010,Glyma01G03200,Glyma16G04120,Glyma15G10370,Glyma06G43050,Glyma09G23330,Glyma20G03040,Glyma18G03120,Glyma18G50450,Glyma04G07370,Glyma09G28100,Glyma08G21340,Glyma13G29390,Glyma15G23310,Glyma18G19670,Glyma07G31310,Glyma13G27840,Glyma17G13910,Glyma13G36500,Glyma16G17760,Glyma10G42870,Glyma07G07290,Glyma17G09940,Glyma08G19860,Glyma13G28750,Glyma19G43630,Glyma10G39470,Glyma03G00440,Glyma07G01250,Glyma11G04310,Glyma06G02310,Glyma14G05930,Glyma07G37520,Glyma16G32640,Glyma13G40550,Glyma20G33460,Glyma07G09260,Glyma09G08370,Glyma06G21910,Glyma04G03120,Glyma13G38950,Glyma04G16670,Glyma10G28880,Glyma08G22890,Glyma20G34790,Glyma08G11940,Glyma14G11040,Glyma10G29700,Glyma06G43940,Glyma10G33790,Glyma03G33590,Glyma05G03640,Glyma10G38450.2,Glyma11G09070,Glyma17G03650,Glyma14G12880,Glyma12G30410,Glyma01G42770,Glyma05G21420,Glyma03G04740,Glyma19G45280,Glyma03G32530,Glyma09G38820,Glyma19G34960,Glyma02G39190,Glyma11G15530,Glyma16G19340,Glyma03G03590,Glyma01G04800,Glyma05G31450,Glyma13G41800,Glyma15G02430,Glyma06G12160,Glyma09G05550,Glyma12G08200,Glyma09G28260,Glyma19G38970,Glyma06G01460,Glyma11G36410,Glyma09G37580,Glyma08G15610,Glyma15G06390,Glyma07G01230,Glyma06G30860,Glyma07G30260,Glyma02G07450,Glyma08G10660,Glyma09G31250,Glyma02G46670,Glyma14G05060,Glyma07G12060,Glyma16G07060,Glyma07G39870,Glyma03G27150,Glyma17G15350,Glyma18G09380,Glyma08G44690,Glyma10G32800,Glyma03G04050,Glyma06G24130,Glyma07G04560,Glyma14G07940,Glyma13G02620,Glyma19G44690,Glyma13G29410,Glyma15G07040,Glyma06G45340,Glyma10G08040,Glyma11G04350,Glyma09G20260,Glyma18G44940,Glyma06G12150,Glyma09G02180,Glyma13G05640,Glyma11G11500,Glyma04G43480,Glyma19G38110,Glyma02G03090,Glyma14G05300,Glyma14G36960,Glyma12G34500,Glyma15G00450,Glyma17G04470,Glyma15G29980,Glyma13G10040,Glyma15G42030,Glyma09G26710,Glyma15G14030,Glyma09G05710,Glyma01G01630,Glyma03G38620,Glyma15G34720,Glyma18G04440,Glyma03G03360,Glyma07G30750,Glyma07G12130,Glyma07G16020,Glyma02G07770,Glyma04G13670,Glyma06G40670,Glyma09G40650,Glyma19G00230,Glyma10G355610,Glyma10G02020,Glyma06G18150,Glyma13G33560,Glyma06G03160,Glyma08G10950,Glyma08G27000,Glyma13G00370,Glyma19G43290,Glyma09G29460,Glyma14G10820,Glyma08G05120,Glyma03G36090,Glyma13G33730,Glyma18G44010,Glyma02G14310,Glyma11G34490,Glyma13G06490,Glyma11G31410,Glyma05G31810,Glyma09G37650,Glyma12G36440,Glyma16G21370,Glyma08G08000,Glyma18G02160,Glyma03G22640,Glyma18G0208780,Glyma08G39340,Glyma04G09210,Glyma11G05960,Glyma17G05250,Glyma12G06320,Glyma19G39680,Glyma12G06530,Glyma09G24590,Glyma01G32360,Glyma09G39660,Glyma01G03410,Glyma19G34580,Glyma12G34330,Glyma10G30060,Glyma15G14020,Glyma07G33200,Glyma13G18690,Glyma18G50510,Glyma07G36440,Glyma13G43090,Glyma20G11610,Glyma09G03190,Glyma13G32900,Glyma04G02160,Glyma12G34390,Glyma12G35390,Glyma11G37170,Glyma17G10420,Glyma02G11110,Glyma03G40860,Glyma07G03260,Glyma15G02780,Glyma19G39580,Glyma19G41210,Glyma07G0710,Glyma18G47380,Glyma04G24380,Glyma10G06090,Glyma15G13380,Glyma07G01890,Glyma19G03620,Glyma07G12010,Glyma09G39200,Glyma19G22790,Glyma16G29380,Glyma15G14080,Glyma20G34690,Glyma13G28860,Glyma08G27130,Glyma05G32070,Glyma07G38560,Glyma05G33830,Glyma08G41510,Glyma17G02150,Glyma06G09770,Glyma13G36730,Glyma13G34290,Glyma15G23150,Glyma11G34210,Glyma17G34410,Glyma04G01440,Glyma16G21050,Glyma11G02040,Glyma05G03320,Glyma10G29970,Glyma20G04810,Glyma09G19730,Glyma09G07590,Glyma20G37930,Glyma11G19170,Glyma13G16540,Glyma10G35220,Glyma06G05770,Glyma10G02920,Glyma06G06080,Glyma19G07410,Glyma05G33270,Glyma20G01060,Glyma08G10900,Glyma04G08620,Glyma02G00340,Glyma12G09220,Glyma11G14390,Glyma02G14450,Glyma10G42470,Glyma17G38210,Glyma13G06620,Glyma15G34810,Glyma07G11880,Glyma08G13040,Glyma16G32700,Glyma10G30360,Glyma13G39530,Glyma07G29630,Glyma19G29570,Glyma10G23520,Glyma05G08770,Glyma12G30780,Glyma13G33620,Glyma17G03250,Glyma12G32660,Glyma16G27250,Glyma09G39390,Glyma09G04710,Glyma05G33790,Glyma03G07540,Glyma10G34970,Glyma10G00340,Glyma05G08730,Glyma16G26400,Glyma08G20650,Glyma17G15320,Glyma20G01060,Glyma10G01820,Glyma03G26540,Glyma09G03400,Glyma18G50540,Glyma13G33320,Glyma14G12420,Glyma08G02980,Glyma02G06700,Glyma02G01770,Glyma07G10430,Glyma02G15150,Glyma01G41150,Glyma17G08000,Glyma02G42420,Glyma14G10790,Glyma10G05260,Glyma16G00480,Glyma19G37860,Glyma16G30130,Glyma09G35140,Glyma16G32830,Glyma07G06840,Glyma14G04000,Glyma16G32480,Glyma03G27360,Glyma06G18160,Glyma07G02990,Glyma20G00790,Glyma18G08940,Glyma20G39110,Glyma20G27800,Glyma17G34060,Glyma14G04890,Glyma02G16860,Glyma18G45200,Glyma13G07550,Glyma20G35420,Glyma06G09490,Glyma07G07320,Glyma14G04700,Glyma15G11570,Glyma03G29230,Glyma17G07280,Glyma07G39300,Glyma05G02470,Glyma18G53100,Glyma14G03140,Glyma07G09030,Glyma11G19880,Glyma14G03030,Glyma04G06610,Glyma09G30070,Glym

GO:003824 catalytic activity 906/169 5 12864 /2768 2 1.68E -09

a18G49060,Glyma18G45070,Glyma08G18860,Glyma11G07760,Glyma06G47490,Glyma13G42950,Glyma16G26330,Glyma08G20140,Glyma17G36300,Glyma05G09060,Glyma14G37440,Glyma09G13540,Glyma06G02010,Glyma07G09170,Glyma04G33990,Glyma18G04830,Glyma12G04410,Glyma05G05990,Glyma07G31140,Glyma12G36570,Glyma18G08870,Glyma02G48100,Glyma11G11410,Glyma20G16020,Glyma10G32990,Glyma06G40350,Glyma14G29130,Glyma08G15360,Glyma07G10460,Glyma05G02210,Glyma15G02750,Glyma19G35270,Glyma11G05140,Glyma12G31840,Glyma08G47730,Glyma19G00650,Glyma12G30660,Glyma10G41050,Glyma07G09530,Glyma18G42700,Glyma02G43440,Glyma11G32610,Glyma08G14900,Glyma06G05910,Glyma03G32160,Glyma07G15780,Glyma05G00920,Glyma03G37760,Glyma09G36070,Glyma16G27030,Glyma02G03320,Glyma10G31160,Glyma17G34170,Glyma12G17450,Glyma10G39320,Glyma16G08460,Glyma08G39510.2,Glyma17G34480,Glyma08G09540,Glyma06G15860,Glyma10G04480,Glyma03G27470,Glyma15G04350,Glyma19G04140,Glyma13G41790,Glyma08G24510,Glyma04G04510,Glyma07G14010,Glyma18G00700,Glyma08G00740,Glyma05G32340,Glyma16G09890,Glyma06G07410,Glyma04G37770,Glyma08G28460,Glyma06G47380,Glyma17G02290,Glyma13G25660,Glyma09G31840,Glyma03G04700,Glyma03G03700,Glyma03G00800,Glyma06G44010,Glyma09G00810,Glyma10G12660,Glyma04G09340,Glyma05G34540,Glyma14G34480,Glyma20G16170,Glyma16G28400,Glyma08G26940,Glyma08G22520,Glyma10G35560,Glyma15G06600,Glyma10G36220,Glyma06G42640,Glyma05G34180,Glyma17G33190,Glyma09G34110,Glyma14G33400,Glyma14G05020,Glyma06G34940,Glyma13G35790,Glyma06G45590,Glyma18G48600,Glyma14G33700,Glyma01G36290,Glyma13G21030,Glyma01G07970,Glyma14G40510,Glyma16G04910,Glyma10G36750,Glyma08G46130,Glyma02G07740,Glyma19G30650,Glyma12G09050,Glyma05G26960,Glyma18G40680,Glyma11G03800,Glyma09G21970,Glyma02G38280,Glyma12G34960,Glyma09G09390,Glyma17G17780,Glyma11G19120,Glyma18G48520,Glyma06G17550,Glyma06G08480,Glyma16G32650,Glyma11G37910,Glyma11G09060,Glyma18G01240,Glyma09G34860,Glyma11G31700,Glyma20G27860,Glyma10G03000,Glyma01G10100,Glyma01G08600,Glyma14G06570,Glyma15G02520,Glyma04G39120,Glyma15G37670,Glyma12G17340,Glyma12G07200,Glyma04G42830,Glyma14G40380,Glyma18G45440,Glyma08G13150,Glyma17G33470,Glyma07G00670,Glyma06G20360,Glyma08G19890,Glyma20G38610,Glyma14G06970,Glyma16G02290,Glyma14G12710,Glyma20G29480,Glyma13G34960,Glyma16G22370,Glyma10G34490,Glyma19G00450,Glyma02G09080,Glyma08G40030,Glyma05G03100,Glyma15G10610,Glyma03G36310,Glyma09G41690,Glyma02G40850,Glyma16G02340,Glyma17G11760,Glyma04G43190,Glyma13G26680,Glyma19G41050,Glyma06G44970,Glyma16G04680,Glyma15G02980,Glyma18G44800,Glyma15G14200,Glyma18G52070,Glyma05G24830,Glyma04G31770,Glyma06G13880,Glyma04G11870,Glyma04G42370,Glyma08G44730,Glyma14G00380,Glyma16G29780,Glyma11G18350,Glyma17G10120,Glyma10G03200,Glyma10G43400,Glyma20G29060,Glyma15G42080,Glyma13G25570,Glyma16G32960,Glyma12G34430,Glyma08G40810,Glyma08G40920,Glyma19G39560,Glyma18G48350,Glyma09G07040,Glyma16G34290,Glyma12G03140,Glyma01G39380,Glyma10G38810,Glyma02G46070,Glyma08G06730,Glyma08G08550,Glyma03G18430,Glyma08G06520,Glyma09G38730,Glyma01G01500,Glyma14G39930,Glyma15G18310,Glyma04G27730,Glyma15G21010,Glyma02G36720,Glyma08G06330,Glyma18G47590,Glyma06G08880,Glyma06G40110,Glyma02G13630,Glyma18G50650,Glyma02G15290,Glyma09G38460,Glyma05G30230,Glyma14G03040,Glyma07G08400,Glyma01G34780,Glyma01G39760,Glyma06G18700,Glyma20G27720,Glyma17G01310,Glyma03G10980,Glyma09G07100,Glyma18G50440,Glyma06G14920,Glyma19G38040,Glyma18G46930,Glyma04G30870,Glyma13G10530,Glyma05G01460,Glyma03G24260,Glyma15G117430,Glyma07G00350,Glyma13G02420,Glyma09G41570,Glyma10G04530,Glyma05G26940,Glyma08G12070,Glyma11G35100,Glyma15G10870,Glyma19G07330,Glyma12G33340,Glyma07G29650,Glyma13G32300,Glyma20G33150,Glyma15G41000,Glyma03G03640,Glyma13G10200,Glyma17G11670,Glyma04G01110,Glyma15G04850,Glyma16G32710,Glyma16G10760,Glyma09G29900,Glyma04G34140,Glyma05G28150,Glyma04G00580,Glyma20G36220,Glyma01G28880,Glyma10G28640,Glyma05G30030,Glyma04G11640,Glyma12G36780,Glyma13G38120,Glyma18G47400,Glyma12G01450,Glyma07G36500.4,Glyma12G17360,Glyma03G24720,Glyma10G12530,Glyma04G39670,Glyma10G07870,Glyma02G05790,Glyma01G45470,Glyma20G27510,Glyma09G06570,Glyma06G48250,Glyma08G23150,Glyma15G06870,Glyma15G05350,Glyma09G08180,Glyma14G03310,Glyma04G09600,Glyma06G15940,Glyma05G36580,Glyma20G26160,Glyma14G36660,Glyma20G24570,Glyma13G36600,Glyma13G24260,Glyma15G08040,Glyma07G08120,Glyma09G30430,Glyma16G08470,Glyma19G05020,Glyma19G31590,Glyma04G09670,Glyma08G43930,Glyma16G08560,Glyma17G34960,Glyma19G31230,Glyma17G34190,Glyma02G10710,Glyma12G11780,Glyma11G29490,Glyma08G42790,Glyma06G04540,Glyma07G07550,Glyma13G32200,Glyma19G40900,Glyma20G22780,Glyma13G17440,Glyma12G20860,Glyma02G45800,Glyma13G32770,Glyma10G36440,Glyma17G03300,Glyma08G08500,Glyma07G32200,Glyma09G31060,Glyma05G26040,Glyma06G15900,Glyma18G35790,Glyma11G13810,Glyma17G16950,Glyma17G04120,Glyma06G21140,Glyma15G39150,Glyma09G08550,Glyma0048S00320,Glyma12G01380,Glyma17G29990,Glyma04G03250,Glyma09G41840,Glyma07G32590,Glyma17G01500,Glyma02G11290,Glyma04G41060,Glyma08G09050,Glyma07G06610,Glyma20G23930,Glyma07G17140,Glyma05G07540,Glyma13G27810,Glyma07G32540,Glyma10G07500,Glyma05G27850,Glyma17G12550,Glyma18G43390,Glyma16G24610,Glyma20G39350,Glyma15G20000,Glyma14G37620,Glyma03G40720,Glyma09G33120,Glyma08G08400,Glyma18G16060,Glyma03G32210,Glyma01G01900.2,Glyma13G17710,Glyma18G15150,Glyma14G08260,Glyma07G31660,Glyma08G39070,Glyma12G32880,Glyma02G04310,Glyma07G31630,Glyma18G52290,Glyma19G37210,Glyma03G02310,Glyma02G48020,Glyma20G34160,Glyma03G30310,Glyma12G04200,Glyma14G01730,Glyma10G39540,Glyma05G24400,Glyma01G44350,Glyma18G11110,Glyma08G21530,Glyma20G38380,Glyma20G34060,Glyma20G29840,Glyma06G04140,Glyma05G24050,Glyma13G37080,Glyma01G42240,Glyma18G06170,Glyma02G05210,Glyma06G17270,Glyma01G41600,Glyma16G33590,Glyma14G07750,Glyma08G16680,Glyma09G39800,Glyma20G18980,Glyma19G01850,Glyma11G02150,Glyma02G07690,Glyma13G43480,Glyma17G09700,Glyma16G29040,Glyma03G10390,Glyma01G43190,Glyma16G28010,Glyma04G40970,Glyma03G31820,Glyma04G36240,Glyma08G11710,Glyma07G16260,Glyma08G44620,Glyma06G20200,Glyma06G24910,Glyma20G27790,Glyma03G08980,Glyma09G02930,Glyma20G38860,Glyma20G35970,Glyma09G02960,Glyma0220S00210,Glyma17G16070,Glyma18G07130,Glyma01G00960,Glyma09G40150,Glyma09G27030,Glyma06G07380,Glyma09G23150,Glyma10G38370,Glyma02G02580,Glyma12G22230,Glyma20G19210,Glyma18G06570,Glyma18G38470,Glyma01G36980,Glyma18G52110,Glyma12G01480,Glyma14G16060,Glyma06G47870,Glyma10G40900,Glyma08G10880,Glyma12G02880,Glyma08G41930,Glyma19G43270,Glyma09G38510,Glyma20G30100,Glyma19G39180,Glyma18G47140,Glyma07G31380,Glyma06G640920,Glyma05G23260,Glyma01G29540,Glyma13G35610,Glyma16G01090,Glyma15G34620,Glyma11G02620,Glyma13G26970,Glyma07G11320,Glyma08G12750,Glyma13G34810,Glyma15G00670,Glyma17G09120,Glyma03G00540,Glyma12G34890,Glyma15G00340,Glyma07G05820,Glyma07G03660,Glyma10G30700,Glyma10G30150,Glyma05G03440,Glyma05G35800,Glyma05G33540,Glyma18G43980,Glyma06G21440,Glyma13G42680,Glyma06G12510,Glyma13G23610,Glyma17G05670,Glyma11G38230,Glyma20G27660,Glyma17G30980,Glyma15G14810,Glyma08G13060,Glyma15G14210,Glyma17G14680,Glyma03G32690,Glyma19G34250,Glyma20G29700,Glyma03G42000,Glyma14G07700,Glyma15G05750,Glyma20G08160,Glyma06G38190,Glym



|           |                       |          |             |          |                                                                                                                                                                                                                                                                                                                                                                                                                                                                                                                                                                                                                                                                                                                                                                                                                                                                                                                                                                                                                                                                                                                                                                                                                                                                                                                                                                                                                                                                                                                                                                                                                                                                                                                                                                                                                                                                                                                                                                                                                                                                                                                                                                                                                                                                                                                                                                                                                                                                                                                                      |
|-----------|-----------------------|----------|-------------|----------|--------------------------------------------------------------------------------------------------------------------------------------------------------------------------------------------------------------------------------------------------------------------------------------------------------------------------------------------------------------------------------------------------------------------------------------------------------------------------------------------------------------------------------------------------------------------------------------------------------------------------------------------------------------------------------------------------------------------------------------------------------------------------------------------------------------------------------------------------------------------------------------------------------------------------------------------------------------------------------------------------------------------------------------------------------------------------------------------------------------------------------------------------------------------------------------------------------------------------------------------------------------------------------------------------------------------------------------------------------------------------------------------------------------------------------------------------------------------------------------------------------------------------------------------------------------------------------------------------------------------------------------------------------------------------------------------------------------------------------------------------------------------------------------------------------------------------------------------------------------------------------------------------------------------------------------------------------------------------------------------------------------------------------------------------------------------------------------------------------------------------------------------------------------------------------------------------------------------------------------------------------------------------------------------------------------------------------------------------------------------------------------------------------------------------------------------------------------------------------------------------------------------------------------|
|           |                       |          |             |          | a05G30260,Glyma10G35310,Glyma09G36200,Glyma07G02940,Glyma14G38650,Glyma09G28920,Glyma15G04280,Glyma05G27840,Glyma08G05720,Glyma16G24800,Glyma17G07940                                                                                                                                                                                                                                                                                                                                                                                                                                                                                                                                                                                                                                                                                                                                                                                                                                                                                                                                                                                                                                                                                                                                                                                                                                                                                                                                                                                                                                                                                                                                                                                                                                                                                                                                                                                                                                                                                                                                                                                                                                                                                                                                                                                                                                                                                                                                                                                |
| GO:005529 | sugar binding         | 30/1695  | 169/27682   | 1.30E-07 | Glyma13G42680,Glyma06G40920,Glyma11G11500,Glyma04G04510,Glyma07G01250,Glyma09G21970,Glyma17G05250,Glyma13G23610,Glyma12G17340,Glyma13G34520,Glyma08G06520,Glyma07G12060,Glyma15G334810,Glyma06G45590,Glyma12G17450,Glyma12G17360,Glyma03G00540,Glyma02G05790,Glyma06G40110,Glyma07G12010,Glyma02G12030,Glyma06G40350,Glyma02G07770,Glyma09G38460,Glyma15G02750,Glyma13G34540,Glyma06G40670,Glyma11G07760,Glyma02G07740,Glyma08G20650                                                                                                                                                                                                                                                                                                                                                                                                                                                                                                                                                                                                                                                                                                                                                                                                                                                                                                                                                                                                                                                                                                                                                                                                                                                                                                                                                                                                                                                                                                                                                                                                                                                                                                                                                                                                                                                                                                                                                                                                                                                                                                 |
| GO:006915 | apoptosis             | 48/1695  | 352/27682   | 1.73E-07 | Glyma13G25420,Glyma01G27440,Glyma06G39990,Glyma13G26250,Glyma18G09980,Glyma15G37320,Glyma15G13290,Glyma02G03760,Glyma18G51960,Glyma16G34030,Glyma16G03780,Glyma15G37390,Glyma13G25970,Glyma06G17560,Glyma06G40740,Glyma12G16450,Glyma20G06780,Glyma08G13040,Glyma18G43530,Glyma06G41880,Glyma06G40780,Glyma06G47650,Glyma13G26000,Glyma07G07110,Glyma10G32800,Glyma18G09290,Glyma16G10080,Glyma06G40980,Glyma03G05400,Glyma16G25010,Glyma18G09670,Glyma16G24940,Glyma18G10610,Glyma18G11590,Glyma15G37140,Glyma06G40690,Glyma16G33950,Glyma08G12540,Glyma15G37290,Glyma16G33590,Glyma18G10470,Glyma03G05640,Glyma18G51950,Glyma03G04780,Glyma06G41430,Glyma06G40710,Glyma19G31950,Glyma08G43170                                                                                                                                                                                                                                                                                                                                                                                                                                                                                                                                                                                                                                                                                                                                                                                                                                                                                                                                                                                                                                                                                                                                                                                                                                                                                                                                                                                                                                                                                                                                                                                                                                                                                                                                                                                                                                      |
| GO:012501 | programmed cell death | 48/1695  | 352/27682   | 1.73E-07 | Glyma13G25420,Glyma01G27440,Glyma06G39990,Glyma13G26250,Glyma18G09980,Glyma15G37320,Glyma15G13290,Glyma02G03760,Glyma18G51960,Glyma16G34030,Glyma16G03780,Glyma15G37390,Glyma13G25970,Glyma06G17560,Glyma06G40740,Glyma12G16450,Glyma20G06780,Glyma08G13040,Glyma18G43530,Glyma06G41880,Glyma06G40780,Glyma06G47650,Glyma13G26000,Glyma07G07110,Glyma10G32800,Glyma18G09290,Glyma16G10080,Glyma06G40980,Glyma03G05400,Glyma16G25010,Glyma18G09670,Glyma16G24940,Glyma18G10610,Glyma18G11590,Glyma15G37140,Glyma06G40690,Glyma16G33950,Glyma08G12540,Glyma15G37290,Glyma16G33590,Glyma18G10470,Glyma03G05640,Glyma18G51950,Glyma03G04780,Glyma06G41430,Glyma06G40710,Glyma19G31950,Glyma08G43170                                                                                                                                                                                                                                                                                                                                                                                                                                                                                                                                                                                                                                                                                                                                                                                                                                                                                                                                                                                                                                                                                                                                                                                                                                                                                                                                                                                                                                                                                                                                                                                                                                                                                                                                                                                                                                      |
| GO:008219 | cell death            | 51/1695  | 386/27682   | 1.98E-07 | Glyma18G09980,Glyma18G51960,Glyma15G37390,Glyma12G16450,Glyma06G40740,Glyma18G43530,Glyma20G06780,Glyma13G26000,Glyma18G09290,Glyma16G10080,Glyma01G36170,Glyma06G40980,Glyma03G05400,Glyma16G25010,Glyma18G10610,Glyma15G37140,Glyma06G40690,Glyma08G12540,Glyma15G37290,Glyma18G51950,Glyma03G05640,Glyma03G04780,Glyma03G22960,Glyma13G25420,Glyma01G27440,Glyma06G39990,Glyma15G37320,Glyma13G26250,Glyma15G13290,Glyma02G03760,Glyma16G34030,Glyma16G03780,Glyma13G25970,Glyma06G17560,Glyma08G13040,Glyma06G41880,Glyma06G47650,Glyma06G40780,Glyma10G32800,Glyma07G07110,Glyma18G09670,Glyma15G08530,Glyma16G24940,Glyma18G11590,Glyma16G33950,Glyma16G33590,Glyma18G10470,Glyma06G41430,Glyma06G40710,Glyma08G43170,Glyma19G31950                                                                                                                                                                                                                                                                                                                                                                                                                                                                                                                                                                                                                                                                                                                                                                                                                                                                                                                                                                                                                                                                                                                                                                                                                                                                                                                                                                                                                                                                                                                                                                                                                                                                                                                                                                                            |
| GO:016265 | death                 | 51/1695  | 386/27682   | 1.98E-07 | Glyma18G09980,Glyma18G51960,Glyma15G37390,Glyma12G16450,Glyma06G40740,Glyma18G43530,Glyma20G06780,Glyma13G26000,Glyma18G09290,Glyma16G10080,Glyma01G36170,Glyma06G40980,Glyma03G05400,Glyma16G25010,Glyma18G10610,Glyma15G37140,Glyma06G40690,Glyma08G12540,Glyma15G37290,Glyma18G51950,Glyma03G05640,Glyma03G04780,Glyma03G22960,Glyma13G25420,Glyma01G27440,Glyma06G39990,Glyma15G37320,Glyma13G26250,Glyma15G13290,Glyma02G03760,Glyma16G34030,Glyma16G03780,Glyma13G25970,Glyma06G17560,Glyma08G13040,Glyma06G41880,Glyma06G47650,Glyma06G40780,Glyma10G32800,Glyma07G07110,Glyma18G09670,Glyma15G08530,Glyma16G24940,Glyma18G11590,Glyma16G33950,Glyma16G33590,Glyma18G10470,Glyma06G41430,Glyma06G40710,Glyma08G43170,Glyma19G31950                                                                                                                                                                                                                                                                                                                                                                                                                                                                                                                                                                                                                                                                                                                                                                                                                                                                                                                                                                                                                                                                                                                                                                                                                                                                                                                                                                                                                                                                                                                                                                                                                                                                                                                                                                                            |
| GO:008152 | metabolic process     | 799/1695 | 11489/27682 | 7.51E-07 | Glyma01G37920,Glyma14G35680,Glyma19G41590,Glyma17G09860,Glyma17G08610,Glyma11G10320,Glyma14G37070,Glyma16G24640,Glyma14G04850,Glyma17G04800,Glyma06G08730,Glyma09G32180,Glyma13G26260,Glyma12G08900,Glyma02G08970,Glyma0028S00210,Glyma18G10220,Glyma06G18970,Glyma11G08560,Glyma11G13480,Glyma12G14230,Glyma17G08540,Glyma15G09700,Glyma17G01730,Glyma17G11620,Glyma06G39750,Glyma14G36420,Glyma13G23840,Glyma18G49880,Glyma05G25550,Glyma08G03240,Glyma13G21820,Glyma07G18500,Glyma05G33240,Glyma04G01610,Glyma10G36320,Glyma02G00490,Glyma15G05680,Glyma02G47230,Glyma07G15500,Glyma02G43200,Glyma04G41630,Glyma02G12030,Glyma015G36110,Glyma20G23010,Glyma07G06620,Glyma01G03200,Glyma06G04120,Glyma06G43050,Glyma09G23330,Glyma20G03040,Glyma18G03120,Glyma18G50450,Glyma09G28100,Glyma08G21340,Glyma20G31530,Glyma15G23310,Glyma18G19670,Glyma07G31310,Glyma13G27840,Glyma13G36500,Glyma05G30650,Glyma16G17760,Glyma03G26080,Glyma10G42870,Glyma07G07290,Glyma17G09940,Glyma08G19860,Glyma10G39470,Glyma06G06380.2,Glyma03G00440,Glyma03G00420,Glyma07G01250,Glyma11G04310,Glyma06G02310,Glyma16G32640,Glyma13G40550,Glyma20G33460,Glyma07G09260,Glyma06G21910,Glyma04G03120,Glyma13G38950,Glyma04G36150,Glyma04G16670,Glyma09G08260,Glyma20G34790,Glyma10G38490,Glyma14G11040,Glyma10G29700,Glyma10G33790,Glyma05G03640,Glyma10G38450.2,Glyma11G09070,Glyma17G03650,Glyma14G12880,Glyma12G30410,Glyma01G42770,Glyma05G21420,Glyma03G04740,Glyma19G45280,Glyma09G38820,Glyma02G39190,Glyma11G15530,Glyma03G03590,Glyma01G04800,Glyma05G31450,Glyma13G41800,Glyma15G02430,Glyma06G12160,Glyma09G05550,Glyma12G08200,Glyma09G28260,Glyma11G02190,Glyma06G01460,Glyma09G37580,Glyma08G15610,Glyma15G06390,Glyma06G30860,Glyma07G30260,Glyma02G46670,Glyma14G05060,Glyma07G12060,Glyma16G07060,Glyma07G39870,Glyma03G27150,Glyma03G37490,Glyma18G09380,Glyma08G44690,Glyma07G04560,Glyma14G07940,Glyma15G37240,Glyma13G02620,Glyma19G44690,Glyma13G29410,Glyma06G45340,Glyma10G08040,Glyma08G18760,Glyma09G20260,Glyma18G44940,Glyma06G12150,Glyma09G02180,Glyma13G05640,Glyma11G11500,Glyma04G43480,Glyma14G05300,Glyma14G36960,Glyma15G00450,Glyma13G25110,Glyma17G04470,Glyma15G29980,Glyma13G10040,Glyma09G26710,Glyma14G08920,Glyma15G14030,Glyma09G05710,Glyma01G01630,Glyma03G38620,Glyma15G34720,Glyma18G04440,Glyma07G12130,Glyma10G43690,Glyma04G40150,Glyma02G07770,Glyma04G13670,Glyma04G34770,Glyma06G40670,Glyma09G40650,Glyma19G00230,Glyma10G35610,Glyma14G03380,Glyma06G18150,Glyma13G33560,Glyma06G03160,Glyma15 |

G06040,Glyma08G10950,Glyma08G27000,Glyma13G00370,Glyma19G43290,Glyma09G29460,Glyma14G10820,Glyma03G36090,Glyma13G33730,Glyma18G44010,Glyma02G14310,Glyma11G34490,Glyma13G06490,Glyma11G31410,Glyma09G37650,Glyma12G36440,Glyma18G11010,Glyma16G21370,Glyma08G08000,Glyma10G29200,Glyma18G02160,Glyma03G22640,Glyma20G08780,Glyma08G39340,Glyma04G09210,Glyma11G05960,Glyma17G05250,Glyma02G43080,Glyma12G06320,Glyma19G39680,Glyma12G06530,Glyma09G24590,Glyma01G32360,Glyma09G39660,Glyma01G03410,Glyma19G34580,Glyma15G14020,Glyma07G33200,Glyma13G18690,Glyma18G50510,Glyma13G43090,Glyma20G11610,Glyma09G03190,Glyma13G32900,Glyma04G02160,Glyma12G34390,Glyma12G35390,Glyma11G20180,Glyma09G00300,Glyma11G37170,Glyma17G10420,Glyma02G11110,Glyma03G40860,Glyma19G41210,Glyma04G24380,Glyma10G06090,Glyma07G01890,Glyma19G03620,Glyma07G12010,Glyma09G39200,Glyma16G29380,Glyma15G14080,Glyma20G34690,Glyma05G32070,Glyma06G42800,Glyma06G09770,Glyma14G05050,Glyma13G36730,Glyma13G34290,Glyma15G23150,Glyma11G34210,Glyma04G01440,Glyma10G29970,Glyma09G19730,Glyma09G07590,Glyma11G19170,Glyma13G16540,Glyma19G38720,Glyma10G35220,Glyma06G05770,Glyma06G06080,Glyma19G07410,Glyma05G33270,Glyma20G01060,Glyma08G10900,Glyma04G08620,Glyma12G09220,Glyma12G10580,Glyma11G14390,Glyma02G14450,Glyma20G23080,Glyma10G42470,Glyma17G38210,Glyma13G06620,Glyma15G34810,Glyma08G13040,Glyma16G32700,Glyma10G30360,Glyma01G01750,Glyma07G29630,Glyma10G40910,Glyma10G23520,Glyma05G08770,Glyma12G30780,Glyma13G33620,Glyma16G27250,Glyma09G39390,Glyma09G04710,Glyma05G33790,Glyma03G07540,Glyma11G10100,Glyma10G34970,Glyma07G00340,Glyma05G08730,Glyma08G20650,Glyma17G15320,Glyma18G02520,Glyma10G01820,Glyma03G26540,Glyma09G03400,Glyma18G50540,Glyma13G33320,Glyma14G12420,Glyma08G02980,Glyma16G25600,Glyma02G06700,Glyma02G01770,Glyma02G15150,Glyma01G41150,Glyma17G08000,Glyma09G00440,Glyma02G42420,Glyma14G10790,Glyma10G05260,Glyma16G00480,Glyma16G30130,Glyma09G35140,Glyma16G32830,Glyma16G32480,Glyma03G27360,Glyma06G18160,Glyma07G02990,Glyma18G08940,Glyma20G39110,Glyma20G27800,Glyma14G04890,Glyma18G45200,Glyma18G08220,Glyma20G35420,Glyma06G09490,Glyma07G07320,Glyma14G04700,Glyma15G11570,Glyma09G03660,Glyma07G39300,Glyma17G07280,Glyma05G02470,Glyma14G03140,Glyma15G42640,Glyma07G09030,Glyma11G19880,Glyma15G14550,Glyma14G03030,Glyma04G06610,Glyma09G30070,Glyma18G49060,Glyma18G45070,Glyma08G18860,Glyma11G07760,Glyma19G37820,Glyma13G42950,Glyma16G26330,Glyma05G09060,Glyma14G37440,Glyma09G13540,Glyma06G02010,Glyma07G09170,Glyma04G33990,Glyma05G05990,Glyma07G31140,Glyma12G36570,Glyma18G04130,Glyma17G01570,Glyma02G48100,Glyma11G11410,Glyma08G22690,Glyma10G32990,Glyma06G40350,Glyma08G15360,Glyma14G29130,Glyma07G10460,Glyma15G02750,Glyma11G05140,Glyma08G47730,Glyma12G31840,Glyma19G00650,Glyma12G30660,Glyma18G42700,Glyma02G43440,Glyma11G32610,Glyma08G14900,Glyma03G32160,Glyma10G12350,Glyma10G34020,Glyma03G37760,Glyma09G36070,Glyma02G03320,Glyma11G04560,Glyma10G31160,Glyma17G34170,Glyma12G17450,Glyma10G39320,Glyma16G08460,Glyma17G34480,Glyma08G09540,Glyma06G15860,Glyma10G04480,Glyma03G27470,Glyma15G04350,Glyma19G04140,Glyma13G41790,Glyma08G24510,Glyma04G04510,Glyma07G14010,Glyma08G00740,Glyma05G32340,Glyma16G09890,Glyma04G37770,Glyma08G28460,Glyma17G02290,Glyma09G31840,Glyma03G04700,Glyma03G03700,Glyma03G00800,Glyma09G00810,Glyma04G09340,Glyma14G34480,Glyma16G28400,Glyma08G26940,Glyma08G22520,Glyma10G35560,Glyma10G36220,Glyma06G42640,Glyma17G33190,Glyma09G34110,Glyma14G33400,Glyma14G05020,Glyma06G34940,Glyma18G32680,Glyma12G05460.3,Glyma06G45590,Glyma18G48600,Glyma14G33700,Glyma13G21030,Glyma01G07970,Glyma16G04910,Glyma17G09690,Glyma11G34170,Glyma08G10910,Glyma02G07740,Glyma15G40830,Glyma19G30650,Glyma14G09950,Glyma12G09050,Glyma05G26960,Glyma18G40680,Glyma11G03800,Glyma09G21970,Glyma02G38280,Glyma08G01180,Glyma09G09390,Glyma20G33200,Glyma17G17780,Glyma18G48520,Glyma06G17550,Glyma20G34340,Glyma06G08480,Glyma11G09060,Glyma18G01240,Glyma09G34860,Glyma10G03000,Glyma10G28890,Glyma01G10100,Glyma01G08600,Glyma14G06570,Glyma15G02520,Glyma04G39120,Glyma11G04020,Glyma15G37670,Glyma12G17340,Glyma12G07200,Glyma04G42830,Glyma08G13150,Glyma11G13460,Glyma17G33470,Glyma07G00670,Glyma15G19810,Glyma14G06970,Glyma16G02290,Glyma14G12710,Glyma20G29480,Glyma17G10710,Glyma13G34960,Glyma16G22370,Glyma10G34490,Glyma19G00450,Glyma02G09080,Glyma08G40030,Glyma05G03100,Glyma07G31350,Glyma15G10610,Glyma09G41690,Glyma02G40850,Glyma16G02340,Glyma17G11760,Glyma04G43190,Glyma06G11940,Glyma13G26680,Glyma19G41050,Glyma06G44970,Glyma16G04680,Glyma18G44800,Glyma19G27420,Glyma15G14200,Glyma02G13540,Glyma18G52070,Glyma05G24830,Glyma16G05410,Glyma06G13880,Glyma04G11870,Glyma04G42370,Glyma08G44730,Glyma14G00380,Glyma16G29780,Glyma11G18350,Glyma17G10120,Glyma10G03200,Glyma10G43400,Glyma15G42080,Glyma18G14560,Glyma16G32960,Glyma12G34430,Glyma08G40810,Glyma08G40920,Glyma18G48350,Glyma16G34290,Glyma12G03140,Glyma01G39380,Glyma10G38810,Glyma02G46070,Glyma08G06730,Glyma08G08550,Glyma03G18430,Glyma10G806520,Glyma01G37090,Glyma01G42210,Glyma01G01500,Glyma14G39930,Glyma04G27730,Glyma15G21010,Glyma02G36720,Glyma08G06330,Glyma18G47590,Glyma06G08880,Glyma06G40110,Glyma02G13630,Glyma18G50650,Glyma02G15290,Glyma09G38460,Glyma05G30230,Glyma14G03040,Glyma01G34780,Glyma01G39760,Glyma20G27720,Glyma03G10980,Glyma09G07100,Glyma18G50440,Glyma06G14920,Glyma17G11130,Glyma10G33310,Glyma04G30870,Glyma05G01460,Glyma03G24260,Glyma15G17430,Glyma13G02420,Glyma09G41570,Glyma10G04530,Glyma11G35100,Glyma08G12070,Glyma12G36820,Glyma19G07330,Glyma19G29170,Glyma07G29650,Glyma12G33340,Glyma15G00950,Glyma03G03640,Glyma13G10200,Glyma15G04850,Glyma16G32710,Glyma16G10760,Glyma09G29900,Glyma19G30630,Glyma05G28150,Glyma04G00580,Glyma20G36220,Glyma01G28880,Glyma05G30030,Glyma04G11640,Glyma12G36780,Glyma13G38120,Glyma07G36500.4,Glyma12G17360,Glyma03G24720,Glyma10G12530,Glyma10G07870,Glyma17G10370,Glyma02G05790,Glyma01G45470,Glyma20G27510,Glyma09G06570,Glyma06G48250,Glyma08G23150,Glyma15G06870,Glyma15G05350,Glyma09G08180,Glyma11G02560,Glyma14G03310,Glyma04G09600,Glyma06G15940,Glyma05G36580,Glyma14G36660,Glyma13G36600,Glyma15G08040,Glyma09G30430,Glyma16G08470,Glyma19G05020,Glyma19G31590,Glyma04G09670,Glyma08G43930,Glyma16G08560,Glyma17G34960,Glyma19G31230,Glyma17G34190,Glyma07G10090,Glyma18G01960,Glyma02G10710,Glyma14G40460,Glyma11G29490,Glyma08G42790,Glyma06G04540,Glyma12G20860,Glyma02G45800,Glyma13G32770,Glyma17G03300,Glyma08G08500,Glyma07G32200,Glyma05G26040,Glyma09G31060,Glyma11G13810,Glyma17G04120,Glyma17G16950,Glyma15G39150,Glyma06G21140,Glyma09G08550,Glyma0048S00320,Glyma12G01380,Glyma17G29990,Glyma04G03250,Glyma17G14760,Glyma07G32590,Glyma17G01500,Glyma02G11290,Glyma16G28070,Glyma07G06610,Glyma07G17140,Glyma20G23930,Glyma12G37040,Glyma09G24410,Glyma05G07540,Glyma13G27810,Glyma13G18510,Glyma10G07500,Glyma16G24610,Glyma18G43390,Glyma03G40720,Glyma09G33120,Glyma18G16060,Glyma03G32210,Glyma09G28040,Glyma20G33570,Glyma20G38370,Glyma13G17710,Glyma08G16150,Glyma07G31660,Glyma14G08260,Glyma18G15150,Glyma12G32880,Glyma08G39070,Glyma06G19310,Glyma02G04310,Glyma07G31630,Glyma18G52290,Glyma19G37210,Glyma03G02310,Glyma02G4840

|           |                      |          |            |          |                                                                                                                                                                                                                                                                                                                                                                                                                                                                                                                                                                                                                                                                                                                                                                                                                                                                                                                                                                                                                                                                                                                                                                                                                                                                                                                                                                                                                                                                                                                                                                                                                                                                                                                                                                                                                                                                                                                                                                                                                                                                                                                                                                                                                                                                                                                                                                                                                                                                                                                                                                                                                                                                                                                                                                                                                                                                                                                                                                                                                                                                                                                                                                                                                                                                                                                                                                                                                                                                                                                                                                                                                                                                                                                                                                                                                                                                                                                                                                                                                                                                                                                                                                                                                                                                                                                                                                                                                                                                                                                                                                                                                                                                                                                                                                                                                         |
|-----------|----------------------|----------|------------|----------|-------------------------------------------------------------------------------------------------------------------------------------------------------------------------------------------------------------------------------------------------------------------------------------------------------------------------------------------------------------------------------------------------------------------------------------------------------------------------------------------------------------------------------------------------------------------------------------------------------------------------------------------------------------------------------------------------------------------------------------------------------------------------------------------------------------------------------------------------------------------------------------------------------------------------------------------------------------------------------------------------------------------------------------------------------------------------------------------------------------------------------------------------------------------------------------------------------------------------------------------------------------------------------------------------------------------------------------------------------------------------------------------------------------------------------------------------------------------------------------------------------------------------------------------------------------------------------------------------------------------------------------------------------------------------------------------------------------------------------------------------------------------------------------------------------------------------------------------------------------------------------------------------------------------------------------------------------------------------------------------------------------------------------------------------------------------------------------------------------------------------------------------------------------------------------------------------------------------------------------------------------------------------------------------------------------------------------------------------------------------------------------------------------------------------------------------------------------------------------------------------------------------------------------------------------------------------------------------------------------------------------------------------------------------------------------------------------------------------------------------------------------------------------------------------------------------------------------------------------------------------------------------------------------------------------------------------------------------------------------------------------------------------------------------------------------------------------------------------------------------------------------------------------------------------------------------------------------------------------------------------------------------------------------------------------------------------------------------------------------------------------------------------------------------------------------------------------------------------------------------------------------------------------------------------------------------------------------------------------------------------------------------------------------------------------------------------------------------------------------------------------------------------------------------------------------------------------------------------------------------------------------------------------------------------------------------------------------------------------------------------------------------------------------------------------------------------------------------------------------------------------------------------------------------------------------------------------------------------------------------------------------------------------------------------------------------------------------------------------------------------------------------------------------------------------------------------------------------------------------------------------------------------------------------------------------------------------------------------------------------------------------------------------------------------------------------------------------------------------------------------------------------------------------------------------------------------|
|           |                      |          |            |          | 20,Glyma20G34160,Glyma14G01730,Glyma12G04200,Glyma10G39540,Glyma01G44350,Glyma18G11110,Glyma08G21530,Glyma20G34060,Glyma06G04140,Glyma13G37080,Glyma18G06170,Glyma12G30010,Glyma02G05210,Glyma06G17270,Glyma17G02080,Glyma01G41600,Glyma09G39800,Glyma05G00310,Glyma14G07750,Glyma20G18980,Glyma19G01850,Glyma11G02150,Glyma10G06500,Glyma02G09370,Glyma13G43480,Glyma17G09700,Glyma05G37970,Glyma01G43190,Glyma04G40970,Glyma10G41990,Glyma03G31820,Glyma09G29980,Glyma07G16260,Glyma08G44620,Glyma06G20200,Glyma20G27790,Glyma09G00280,Glyma03G08980,Glyma07G09820,Glyma14G01440,Glyma09G02930,Glyma20G38860,Glyma09G02960,Glyma20G35970,Glyma0220S00210,Glyma09G1853590,Glyma17G16070,Glyma01G00960,Glyma09G40150,Glyma09G27030,Glyma06G07380,Glyma09G23150,Glyma10G38370,Glyma02G02580,Glyma18G14770,Glyma09G00580,Glyma18G38470,Glyma18G06570,Glyma01G36980,Glyma18G52110,Glyma12G01480,Glyma06G47870,Glyma10G40900,Glyma08G10880,Glyma12G02880,Glyma05G36200,Glyma19G43270,Glyma20G30100,Glyma02G44040,Glyma18G47140,Glyma07G31380,Glyma06G40920,Glyma05G23260,Glyma07G39980,Glyma06G11820,Glyma16G01090,Glyma15G34620,Glyma18G01530,Glyma11G02620,Glyma05G01510,Glyma13G26970,Glyma07G11320,Glyma08G12750,Glyma13G34810,Glyma15G00670,Glyma17G09120,Glyma03G00540,Glyma12G34890,Glyma15G00340,Glyma07G05820,Glyma05G03440,Glyma05G35800,Glyma05G33540,Glyma18G43980,Glyma06G21440,Glyma13G42680,Glyma06G12510,Glyma13G23610,Glyma17G05670,Glyma11G38230,Glyma20G27660,Glyma15G14810,Glyma08G13060,Glyma15G14210,Glyma17G14680,Glyma03G32690,Glyma19G34250,Glyma03G42000,Glyma14G07700,Glyma15G05750,Glyma05G03930,Glyma20G08160,Glyma06G38190,Glyma05G30260,Glyma07G02940,Glyma14G38650,Glyma09G28920,Glyma15G04280,Glyma05G27840,Glyma08G05720,Glyma17G07940                                                                                                                                                                                                                                                                                                                                                                                                                                                                                                                                                                                                                                                                                                                                                                                                                                                                                                                                                                                                                                                                                                                                                                                                                                                                                                                                                                                                                                                                                                                                                                                                                                                                                                                                                                                                                                                                                                                                                                                                                                                                                                                                                                                                                                                                                                                                                                                                                                                                                                                                                                                                                                                                                                                                                                                                                                                                                                                                                                                                                                                    |
| GO:030246 | carbohydrate binding | 38/1695  | 271/27682  | 1.62E-06 | Glyma13G42680,Glyma06G40920,Glyma11G11500,Glyma04G04510,Glyma06G09770,Glyma07G01250,Glyma15G37670,Glyma09G21970,Glyma17G05250,Glyma13G23610,Glyma12G17340,Glyma13G34520,Glyma08G06520,Glyma07G12060,Glyma15G34810,Glyma06G45590,Glyma01G36980,Glyma12G17450,Glyma04G09670,Glyma12G17360,Glyma03G00540,Glyma02G05790,Glyma06G40110,Glyma07G120110,Glyma01G02560,Glyma02G12030,Glyma03G08980,Glyma06G40350,Glyma02G07770,Glyma09G38460,Glyma06G17270,Glyma15G02750,Glyma13G34540,Glyma12G34140,Glyma06G40670,Glyma11G07760,Glyma02G07740,Glyma08G20650                                                                                                                                                                                                                                                                                                                                                                                                                                                                                                                                                                                                                                                                                                                                                                                                                                                                                                                                                                                                                                                                                                                                                                                                                                                                                                                                                                                                                                                                                                                                                                                                                                                                                                                                                                                                                                                                                                                                                                                                                                                                                                                                                                                                                                                                                                                                                                                                                                                                                                                                                                                                                                                                                                                                                                                                                                                                                                                                                                                                                                                                                                                                                                                                                                                                                                                                                                                                                                                                                                                                                                                                                                                                                                                                                                                                                                                                                                                                                                                                                                                                                                                                                                                                                                                                    |
|           |                      |          |            |          | Glyma13G41790,Glyma01G37920,Glyma14G35680,Glyma19G41590,Glyma04G04510,Glyma10G34000,Glyma07G14010,Glyma11G07090,Glyma20G24040,Glyma18G00700,Glyma05G32340,Glyma16G09890,Glyma11G07050,Glyma06G07410,Glyma08G28460,Glyma04G37770,Glyma18G43530,Glyma06G47380,Glyma13G26000,Glyma06G15970,Glyma11G15520,Glyma07G17380,Glyma06G07760,Glyma13G26260,Glyma12G08900,Glyma11G11970,Glyma03G00800,Glyma13G43670,Glyma12G14230,Glyma16G01660,Glyma17G01730,Glyma07G11620,Glyma13G25420,Glyma10G42490,Glyma10G33560,Glyma08G22520,Glyma20G24710,Glyma08G03660,Glyma06G39750,Glyma14G36420,Glyma13G23840,Glyma10G36220,Glyma18G49880,Glyma04G04380,Glyma05G25550,Glyma08G03240,Glyma14G33400,Glyma14G05020,Glyma11G35820,Glyma06G17560,Glyma0021S00410,Glyma06G34940,Glyma13G21820,Glyma12G05460.3,Glyma06G41880,Glyma18G32680,Glyma06G45590,Glyma18G48600,Glyma09G05580,Glyma07G18500,Glyma05G33240,Glyma14G33700,Glyma20G33590,Glyma06G10060,Glyma04G01610,Glyma01G07970,Glyma13G21030,Glyma15G11650,Glyma10G36320,Glyma12G07120,Glyma02G00490,Glyma10G29000,Glyma02G47230,Glyma15G05680,Glyma18G09670,Glyma04G41630,Glyma16G24940,Glyma02G12030,Glyma15G36110,Glyma07G06620,Glyma16G04120,Glyma18G11590,Glyma18G10990,Glyma15G10370,Glyma06G43050,Glyma18G03120,Glyma20G03040,Glyma17G09690,Glyma08G46130,Glyma09G33170,Glyma08G10910,Glyma11G34170,Glyma18G50450,Glyma19G30650,Glyma04G07370,Glyma19G29860,Glyma06G41430,Glyma09G28100,Glyma14G09950,Glyma05G26960,Glyma12G09050,Glyma11G03800,Glyma18G40680,Glyma20G31530,Glyma12G04330,Glyma02G38280,Glyma08G01180,Glyma18G48210,Glyma05G30650,Glyma16G17760,Glyma17G17780,Glyma03G26080,Glyma15G37390,Glyma13G02910,Glyma17G09940,Glyma13G35080,Glyma06G17550,Glyma08G19860,Glyma06G08480,Glyma13G28750,Glyma11G09060,Glyma18G02960,Glyma09G34860,Glyma13G32670,Glyma08G12540,Glyma10G28890,Glyma09G07900,Glyma01G10100,Glyma14G06570,Glyma06G06380.2,Glyma15G02520,Glyma03G00420,Glyma11G04020,Glyma04G39120,Glyma11G04310,Glyma11G00440,Glyma02G47850.2,Glyma15G37320,Glyma16G32640,Glyma12G17340,Glyma13G40550,Glyma04G42830,Glyma05G08230,Glyma07G09260,Glyma14G40380,Glyma13G38950,Glyma04G36150,Glyma08G13150,Glyma17G33470,Glyma11G13460,Glyma04G16670,Glyma07G00670,Glyma09G08260,Glyma15G19810,Glyma16G02290,Glyma14G12710,Glyma20G29480,Glyma17G10710,Glyma10G34490,Glyma16G22370,Glyma10G29700,Glyma02G09080,Glyma08G40030,Glyma05G03640,Glyma15G10630,Glyma05G03100,Glyma07G31350,Glyma02G40850,Glyma16G02340,Glyma10G38450.2,Glyma17G11760,Glyma11G09070,Glyma06G11940,Glyma04G43190,Glyma13G26680,Glyma19G31950,Glyma19G41050,Glyma14G12880,Glyma19G27420,Glyma18G44800,Glyma01G42770,Glyma04G14770,Glyma05G21420,Glyma18G52070,Glyma16G05410,Glyma17G34780,Glyma14G00380,Glyma20G33320,Glyma10G03200,Glyma11G15530,Glyma15G42080,Glyma01G04800,Glyma16G32960,Glyma05G31450,Glyma18G14560,Glyma08G40920,Glyma19G43700,Glyma09G05550,Glyma06G12160,Glyma18G48350,Glyma09G28260,Glyma07G11240,Glyma18G07460,Glyma11G02190,Glyma06G01460,Glyma09G37580,Glyma09G07040,Glyma16G34290,Glyma12G03140,Glyma08G15610,Glyma03G04780,Glyma01G39380,Glyma10G38810,Glyma14G34710,Glyma06G30860,Glyma02G46070,Glyma13G37440,Glyma07G30260,Glyma08G06730,Glyma02G46670,Glyma14G05060,Glyma08G06520,Glyma16G03780,Glyma16G04050,Glyma16G07060,Glyma01G37090,Glyma07G32720,Glyma14G22170,Glyma03G37490,Glyma05G07650,Glyma10G32800,Glyma04G27730,Glyma15G18310,Glyma02G36720,Glyma08G06330,Glyma18G47590,Glyma07G04560,Glyma14G07940,Glyma06G40110,Glyma12G06920,Glyma06G08880,Glyma15G37240,Glyma19G44690,Glyma13G02620,Glyma13G29410,Glyma18G50650,Glyma10G08040,Glyma08G03320,Glyma08G18760,Glyma05G30230,Glyma14G03040,Glyma16G33950,Glyma01G34780,Glyma20G25660,Glyma09G02180,Glyma09G02280,Glyma20G27720,Glyma13G05640,Glyma18G50440,Glyma09G34750,Glyma19G38040,Glyma17G11130,Glyma19G38110,Glyma05G01460,Glyma14G36960,Glyma06G47470,Glyma18G51960,Glyma13G25110,Glyma03G24260,Glyma13G10040,Glyma15G29980,Glyma17G04470,Glyma15G17430,Glyma14G06340,Glyma13G02420,Glyma10G04530,Glyma09G05710,Glyma16G22540,Glyma03G38620,Glyma11G35100,Glyma12G36820,Glyma19G29170,Glyma18G04440,Glyma06G40980,Glyma03G05400,Glyma12G08840,Glyma07G12130,Glyma10G43690,Glyma12G33340,Glyma15G00950,Glyma04G40150,Glyma04G34770,Glyma15G37140,Glyma13G10200,Glyma06G40670,Glyma16G05850,Glyma04G01110,Glyma03G40290,Glyma09G40650,Glyma18G51950,Glyma15G04850,Glyma16G32710,Glyma16G10760,Glyma09G29900,Glyma02G48150,Glyma10G35610,Glyma09G42010,Glyma19G30630,Glyma10G02020,Glyma05G28150,Glyma14G03380,Glyma04G00580,Glyma07G06310,Glyma06G10440,Glyma13G26250,Glyma13G33560,Glyma18G08030,Glyma15G06040,Glyma05G30030,Glyma13G00370,Glyma19G00610,Glyma19G43290,Glyma14G10820,Glyma19G42900,Glyma12G17360,Glyma03G36090,Glyma10G12530,Glyma13G33730,Glyma17G10370,Glyma15G08530,G |
| GO:009987 | cellular process     | 696/1695 | 9950/27682 | 3.92E-06 |                                                                                                                                                                                                                                                                                                                                                                                                                                                                                                                                                                                                                                                                                                                                                                                                                                                                                                                                                                                                                                                                                                                                                                                                                                                                                                                                                                                                                                                                                                                                                                                                                                                                                                                                                                                                                                                                                                                                                                                                                                                                                                                                                                                                                                                                                                                                                                                                                                                                                                                                                                                                                                                                                                                                                                                                                                                                                                                                                                                                                                                                                                                                                                                                                                                                                                                                                                                                                                                                                                                                                                                                                                                                                                                                                                                                                                                                                                                                                                                                                                                                                                                                                                                                                                                                                                                                                                                                                                                                                                                                                                                                                                                                                                                                                                                                                         |

Glyma13G06490,Glyma11G34490,Glyma02G14310,Glyma20G27510,Glyma14G37890,Glyma11G31410,Glyma11G32970,Glyma05G31810,Glyma08G23150,Glyma09G37650,Glyma18G11010,Glyma12G36440,Glyma15G06870,Glyma08G08000,Glyma10G29200,Glyma18G02160,Glyma11G02560,Glyma20G08780,Glyma09G08180,Glyma14G03310,Glyma10G30020,Glyma04G09210,Glyma05G36580,Glyma08G21720,Glyma14G36660,Glyma02G43080,Glyma13G36600,Glyma19G39680,Glyma02G04500,Glyma01G32360,Glyma15G08040,Glyma01G03410,Glyma19G34580,Glyma09G30430,Glyma12G34330,Glyma10G30060,Glyma19G05020,Glyma07G33200,Glyma18G50510,Glyma13G18690,Glyma16G08560,Glyma16G25010,Glyma19G31230,Glyma17G34190,Glyma01G40080,Glyma07G10090,Glyma13G05430,Glyma18G01960,Glyma11G09770,Glyma16G40690,Glyma02G10710,Glyma14G40460,Glyma09G03190,Glyma12G34390,Glyma12G35390,Glyma11G29490,Glyma11G20180,Glyma09G00300,Glyma11G37170,Glyma06G39990,Glyma20G36390,Glyma13G17440,Glyma15G25450,Glyma12G20860,Glyma02G45800,Glyma16G34030,Glyma17G10420,Glyma02G11110,Glyma07G32200,Glyma05G26040,Glyma19G41210,Glyma07G07110,Glyma07G04740,Glyma07G00840,Glyma10G06090,Glyma06G21140,Glyma07G01890,Glyma09G08550,Glyma0048S00320,Glyma12G01380,Glyma17G29990,Glyma08G14400,Glyma04G08600,Glyma20G34690,Glyma16G28070,Glyma05G32070,Glyma11G14960,Glyma07G06610,Glyma07G17140,Glyma09G24410,Glyma12G37040,Glyma05G33830,Glyma11G01800,Glyma13G18510,Glyma13G27810,Glyma02G04490,Glyma06G42800,Glyma14G05050,Glyma10G07500,Glyma13G36730,Glyma13G34290,Glyma18G43390,Glyma15G23150,Glyma11G01370,Glyma11G25250,Glyma11G34210,Glyma04G01440,Glyma14G37620,Glyma03G40720,Glyma09G33120,Glyma18G09290,Glyma09G19730,Glyma14G04930,Glyma09G07590,Glyma05G35710,Glyma18G16060,Glyma03G32210,Glyma13G16540,Glyma10G35220,Glyma20G38370,Glyma08G16150,Glyma19G07410,Glyma18G15150,Glyma02G42270,Glyma05G33270,Glyma08G39070,Glyma08G10900,Glyma12G32880,Glyma07G11590,Glyma06G19310,Glyma03G05640,Glyma02G04310,Glyma07G31630,Glyma02G45500,Glyma03G22960,Glyma03G02310,Glyma01G27440,Glyma20G34160,Glyma03G30310,Glyma12G09220,Glyma06G04790,Glyma14G01730,Glyma15G13290,Glyma20G23080,Glyma13G06620,Glyma17G38210,Glyma15G34810,Glyma13G25970,Glyma08G13040,Glyma16G32700,Glyma06G47650,Glyma08G21530,Glyma20G38380,Glyma01G01750,Glyma20G34060,Glyma05G34160,Glyma07G29630,Glyma20G29840,Glyma08G40980,Glyma08G42880,Glyma08G508770,Glyma13G37080,Glyma01G42240,Glyma18G06170,Glyma12G30780,Glyma14G02650,Glyma09G39390,Glyma16G27250,Glyma06G17270,Glyma17G02080,Glyma01G41600,Glyma16G33590,Glyma11G10100,Glyma05G00310,Glyma08G16680,Glyma09G39800,Glyma10G34970,Glyma07G00340,Glyma03G32900,Glyma17G15320,Glyma10G01820,Glyma10G06500,Glyma11G02150,Glyma03G26540,Glyma02G09370,Glyma10G41560,Glyma18G50540,Glyma13G33320,Glyma13G43480,Glyma17G09700,Glyma14G12420,Glyma05G37970,Glyma18G09980,Glyma16G25600,Glyma02G06700,Glyma02G01770,Glyma10G41990,Glyma12G16450,Glyma20G06780,Glyma03G31820,Glyma17G08000,Glyma07G00440,Glyma09G29980,Glyma14G10790,Glyma10G05260,Glyma17G26440,Glyma16G00480,Glyma09G35140,Glyma16G32830,Glyma01G36170,Glyma07G16260,Glyma08G44620,Glyma16G32480,Glyma06G20200,Glyma20G27790,Glyma06G18160,Glyma09G00280,Glyma07G02990,Glyma20G00790,Glyma14G01440,Glyma09G02930,Glyma20G27800,Glyma15G37290,Glyma14G04890,Glyma20G38860,Glyma06G47110,Glyma20G35970,Glyma09G02960,Glyma0220S00210,Glyma08G14520,Glyma18G45200,Glyma18G53590,Glyma17G16070,Glyma01G00960,Glyma09G4150,Glyma09G27030,Glyma18G08220,Glyma06G07380,Glyma09G23150,Glyma10G38370,Glyma02G03760,Glyma02G02580,Glyma18G14770,Glyma16G29510,Glyma12G09680,Glyma17G07280,Glyma07G39300,Glyma09G03660,Glyma09G00580,Glyma05G02470,Glyma18G38470,Glyma06G40780,Glyma01G36980,Glyma05G21910,Glyma18G52110,Glyma14G03140,Glyma15G42640,Glyma06G47870,Glyma11G19880,Glyma02G15490,Glyma15G14550,Glyma14G03030,Glyma13G05130,Glyma05G36200,Glyma19G43270,Glyma09G30070,Glyma09G32510,Glyma20G30100,Glyma18G49060,Glyma02G44040,Glyma08G18860,Glyma18G48470,Glyma17G36440,Glyma18G47140,Glyma17G02560,Glyma13G42950,Glyma09G05540,Glyma06G40710,Glyma03G29280,Glyma06G40920,Glyma07G39980,Glyma05G23260,Glyma01G29540,Glyma18G01530,Glyma14G37440,Glyma05G01510,Glyma09G13540,Glyma06G40740,Glyma06G02010,Glyma07G11320,Glyma04G33990,Glyma12G04410,Glyma05G05990,Glyma16G10080,Glyma07G31140,Glyma15G00670,Glyma17G09120,Glyma03G00540,Glyma12G36570,Glyma18G04130,Glyma18G17290,Glyma18G08870,Glyma17G01570,Glyma02G48100,Glyma08G22690,Glyma12G34890,Glyma15G00340,Glyma10G32990,Glyma06G40350,Glyma07G03660,Glyma18G10610,Glyma07G10460,Glyma14G29130,Glyma08G15360,Glyma10G08700,Glyma19G41890,Glyma11G05140,Glyma04G33950,Glyma05G03440,Glyma05G35800,Glyma02G39150,Glyma19G06650,Glyma12G31840,Glyma12G30660,Glyma06G21440,Glyma18G42700,Glyma07G09530,Glyma19G33030,Glyma03G32160,Glyma13G23610,Glyma11G38230,Glyma10G12350,Glyma05G00920,Glyma03G39320,Glyma03G37760,Glyma20G27660,Glyma16G27030,Glyma10G42350,Glyma17G34400,Glyma15G14810,Glyma08G13060,Glyma11G04560,Glyma17G34170,Glyma12G17450,Glyma10G39320,Glyma19G34250,Glyma16G08460,Glyma05G03310,Glyma03G42000,Glyma08G09540,Glyma06G15860,Glyma05G03930,Glyma06G38190,Glyma05G30260,Glyma03G27470,Glyma07G02940,Glyma14G38650,Glyma18G10470,Glyma15G04280,Glyma05G27840,Glyma15G04350,Glyma19G04140,Glyma08G05720,Glyma11G03140,Glyma17G07940,Glyma08G43170

Glyma13G41790,Glyma01G37920,Glyma14G35680,Glyma04G04510,Glyma07G14010,Glyma05G32340,Glyma16G09890,Glyma14G37070,Glyma08G28460,Glyma04G37770,Glyma14G04850,Glyma17G04800,Glyma06G08730,Glyma13G26260,Glyma12G08900,Glyma02G08970,Glyma0028S00210,Glyma03G00800,Glyma11G13480,Glyma12G14230,Glyma09G00810,Glyma04G09340,Glyma14G34480,Glyma17G08540,Glyma15G09700,Glyma17G01730,Glyma17G11620,Glyma10G35560,Glyma08G22520,Glyma06G39750,Glyma13G23840,Glyma10G36220,Glyma18G49880,Glyma06G42640,Glyma17G33190,Glyma05G25550,Glyma08G03240,Glyma14G33400,Glyma14G05020,Glyma06G34940,Glyma13G21820,Glyma12G05460.3,Glyma18G32680,Glyma06G45590,Glyma18G48600,Glyma07G18500,Glyma05G33240,Glyma14G33700,Glyma13G21030,Glyma01G07970,Glyma10G36320,Glyma02G00490,Glyma15G05680,Glyma02G47230,Glyma02G43200,Glyma04G41630,Glyma02G12030,Glyma15G36110,Glyma20G23010,Glyma07G06620,Glyma16G04120,Glyma20G03040,Glyma18G03120,Glyma17G09690,Glyma02G07740,Glyma08G10910,Glyma11G34170,Glyma19G30650,Glyma18G50450,Glyma09G28100,Glyma14G09950,Glyma12G09050,Glyma05G26960,Glyma08G21340,Glyma18G40680,Glyma11G03800,Glyma20G31530,Glyma15G23310,Glyma18G19670,Glyma13G27840,Glyma09G21970,Glyma08G01180,Glyma09G09390,Glyma05G30650,Glyma16G17760,Glyma17G17780,Glyma03G26080,Glyma07G07290,Glyma18G48520,Glyma17G09940,Glyma06G17550,Glyma08G19860,Glyma20G34340,Glyma06G08480,Glyma11G09060,Glyma09G34860,Glyma10G28890,Glyma01G10100,Glyma01G08600,Glyma14G06570,Glyma06G06380.2,Glyma15G02520,Glyma03G00440,Glyma03G00420,Glyma07G01250,Glyma11G04020,Glyma04G39120,Glyma11G04310,Glyma15G37670,Glyma16G32640,Glyma12G17340,Glyma13G40550,Glyma04G42830,Glyma07G09260,Glyma06G21910,Glyma04G03120,Glyma13G38950,Glyma08G13150,Glyma04G36150,Glyma17G33470,Glyma11G13460,Glyma04G16670,Glyma07G00670,Glyma14G06970,Glyma16G02290,Glyma14G12710,Glyma20G29480,Glyma17G10710,Glyma16G22370,Glyma10G34490,G

GO:044238      primary metabolic process      587/1695      8248/27682      5.18E-06

lyma10G29700,Glyma02G09080,Glyma08G40030,Glyma05G03640,Glyma05G03100,Glyma07G31350,Glyma02G40850,Glyma16G02340,Glyma17G11760,Glyma10G38450.2,Glyma11G09070,Glyma06G11940,Glyma04G43190,Glyma13G26680,Glyma19G41050,Glyma06G44970,Glyma14G12880,Glyma16G04680,Glyma19G27420,Glyma18G44800,Glyma12G30410,Glyma01G42770,Glyma05G21420,Glyma05G24830,Glyma16G05410,Glyma14G00380,Glyma16G29780,Glyma11G18350,Glyma02G39190,Glyma15G42080,Glyma11G15530,Glyma16G32960,Glyma05G31450,Glyma18G14560,Glyma08G40810,Glyma13G41800,Glyma08G40920,Glyma15G02430,Glyma06G12160,Glyma09G05550,Glyma12G08200,Glyma18G48350,Glyma09G28260,Glyma11G02190,Glyma06G01460,Glyma09G37580,Glyma16G34290,Glyma12G03140,Glyma08G15610,Glyma01G39380,Glyma10G38810,Glyma06G30860,Glyma02G46070,Glyma07G30260,Glyma08G06730,Glyma02G46670,Glyma14G05060,Glyma08G06520,Glyma07G12060,Glyma16G07060,Glyma01G37090,Glyma14G22170,Glyma03G37490,Glyma18G09380,Glyma01G01500,Glyma14G39930,Glyma04G27730,Glyma15G21010,Glyma02G36720,Glyma18G47590,Glyma07G04560,Glyma06G40110,Glyma06G08880,Glyma15G37240,Glyma13G02620,Glyma13G29410,Glyma02G13630,Glyma18G50650,Glyma10G08040,Glyma09G38460,Glyma08G18760,Glyma05G30230,Glyma14G03040,Glyma06G12150,Glyma01G34780,Glyma09G02180,Glyma20G27720,Glyma13G05640,Glyma09G07100,Glyma18G50440,Glyma06G14920,Glyma11G11500,Glyma04G43480,Glyma17G11130,Glyma04G30870,Glyma10G33310,Glyma05G01460,Glyma14G05300,Glyma14G36960,Glyma03G24260,Glyma13G25110,Glyma15G29980,Glyma17G04470,Glyma13G10040,Glyma15G17430,Glyma13G02420,Glyma09G26710,Glyma14G08920,Glyma10G04530,Glyma09G05710,Glyma01G01630,Glyma03G38620,Glyma11G35100,Glyma19G07330,Glyma12G36820,Glyma19G29170,Glyma18G04440,Glyma07G12130,Glyma12G33340,Glyma15G00950,Glyma02G07770,Glyma04G40150,Glyma04G34770,Glyma13G10200,Glyma06G40670,Glyma09G40650,Glyma15G04850,Glyma16G32710,Glyma16G10760,Glyma19G00230,Glyma09G29900,Glyma10G35610,Glyma19G30630,Glyma05G28150,Glyma14G03380,Glyma04G00580,Glyma20G36220,Glyma13G33560,Glyma06G03160,Glyma15G06040,Glyma05G30030,Glyma13G00370,Glyma19G43290,Glyma14G10820,Glyma13G38120,Glyma07G36500.4,Glyma12G17360,Glyma03G24720,Glyma03G36090,Glyma10G12530,Glyma13G33730,Glyma17G10370,Glyma10G07870,Glyma02G05790,Glyma01G45470,Glyma02G14310,Glyma11G34490,Glyma13G06490,Glyma20G27510,Glyma11G31410,Glyma09G06570,Glyma06G48250,Glyma08G23150,Glyma09G37650,Glyma12G36440,Glyma18G11010,Glyma08G08000,Glyma10G29200,Glyma15G05350,Glyma18G02160,Glyma11G02560,Glyma09G08180,Glyma20G08780,Glyma08G39340,Glyma14G03310,Glyma04G09210,Glyma06G15940,Glyma05G36580,Glyma14G36660,Glyma17G05250,Glyma13G36600,Glyma02G43080,Glyma19G39680,Glyma12G06530,Glyma01G32360,Glyma15G08040,Glyma01G03410,Glyma09G30430,Glyma19G34580,Glyma19G31590,Glyma04G09670,Glyma07G33200,Glyma13G18690,Glyma18G50510,Glyma16G08560,Glyma19G31230,Glyma17G34190,Glyma18G01960,Glyma02G10710,Glyma14G40460,Glyma09G03190,Glyma11G29490,Glyma12G35390,Glyma08G42790,Glyma06G04540,Glyma11G20180,Glyma09G00300,Glyma11G37170,Glyma12G20860,Glyma02G45800,Glyma17G10420,Glyma02G11110,Glyma17G03300,Glyma07G32200,Glyma05G26040,Glyma19G41210,Glyma11G13810,Glyma04G24380,Glyma17G16950,Glyma17G04120,Glyma10G06090,Glyma06G21140,Glyma07G01890,Glyma09G08550,Glyma0048S00320,Glyma07G12010,Glyma12G01380,Glyma09G39200,Glyma17G14760,Glyma07G32590,Glyma17G01500,Glyma20G34690,Glyma05G32070,Glyma07G06610,Glyma07G17140,Glyma09G24410,Glyma12G37040,Glyma05G07540,Glyma13G18510,Glyma13G27810,Glyma06G42800,Glyma06G09770,Glyma14G05050,Glyma10G07500,Glyma13G36730,Glyma13G34290,Glyma18G43390,Glyma15G23150,Glyma11G34210,Glyma04G01440,Glyma09G33120,Glyma09G19730,Glyma09G07590,Glyma18G16060,Glyma13G16540,Glyma09G28040,Glyma10G35220,Glyma20G33570,Glyma13G17710,Glyma06G06080,Glyma08G16150,Glyma19G07410,Glyma18G15150,Glyma05G33270,Glyma08G39070,Glyma08G10900,Glyma12G32880,Glyma02G04310,Glyma07G31630,Glyma18G52290,Glyma03G02310,Glyma04G08620,Glyma20G34160,Glyma12G04200,Glyma12G09220,Glyma14G01730,Glyma10G42470,Glyma20G23080,Glyma13G06620,Glyma17G38210,Glyma15G34810,Glyma08G13040,Glyma16G32700,Glyma18G11110,Glyma01G01750,Glyma20G34060,Glyma07G29630,Glyma10G40910,Glyma10G23520,Glyma13G37080,Glyma18G06170,Glyma12G30780,Glyma02G05210,Glyma09G39390,Glyma16G27250,Glyma06G17270,Glyma17G02080,Glyma01G41600,Glyma11G10100,Glyma14G07750,Glyma05G00310,Glyma09G39800,Glyma05G08730,Glyma07G00340,Glyma08G20650,Glyma17G15320,Glyma10G06500,Glyma11G02150,Glyma04G326540,Glyma02G09370,Glyma18G50540,Glyma13G33320,Glyma13G43480,Glyma17G09700,Glyma14G12420,Glyma16G25600,Glyma02G06700,Glyma02G01770,Glyma10G41990,Glyma01G41150,Glyma03G31820,Glyma17G08000,Glyma02G42420,Glyma07G00440,Glyma09G29980,Glyma14G10790,Glyma16G00480,Glyma09G35140,Glyma16G32830,Glyma07G16260,Glyma08G44620,Glyma16G32480,Glyma06G20200,Glyma20G27790,Glyma03G08980,Glyma09G00280,Glyma14G01440,Glyma09G02930,Glyma20G39110,Glyma20G27800,Glyma14G04890,Glyma20G38860,Glyma20G35970,Glyma09G02960,Glyma0220S00210,Glyma18G45200,Glyma18G53590,Glyma17G16070,Glyma01G00960,Glyma09G40150,Glyma09G27030,Glyma18G08220,Glyma06G07380,Glyma06G09490,Glyma09G23150,Glyma10G38370,Glyma02G02580,Glyma18G14770,Glyma17G07280,Glyma07G39300,Glyma09G03660,Glyma09G00580,Glyma05G02470,Glyma18G06570,Glyma18G38470,Glyma01G36980,Glyma18G52110,Glyma14G03140,Glyma12G01480,Glyma15G42640,Glyma06G47870,Glyma11G19880,Glyma15G14550,Glyma08G10880,Glyma12G02880,Glyma04G06610,Glyma05G36200,Glyma19G43270,Glyma09G30070,Glyma20G30100,Glyma18G49060,Glyma02G44040,Glyma08G18860,Glyma18G47140,Glyma11G07760,Glyma13G42950,Glyma06G40920,Glyma07G39980,Glyma05G23260,Glyma16G01090,Glyma14G37440,Glyma05G01510,Glyma09G13540,Glyma06G02010,Glyma07G11320,Glyma04G33990,Glyma08G12750,Glyma05G05990,Glyma07G31140,Glyma15G00670,Glyma17G09120,Glyma03G00540,Glyma12G36570,Glyma18G04130,Glyma17G01570,Glyma11G11410,Glyma02G48100,Glyma12G34890,Glyma15G00340,Glyma10G32990,Glyma06G40350,Glyma07G10460,Glyma14G29130,Glyma08G15360,Glyma15G02750,Glyma05G03440,Glyma19G00650,Glyma12G31840,Glyma12G30660,Glyma06G21440,Glyma18G42700,Glyma13G42680,Glyma02G43440,Glyma11G32610,Glyma03G32160,Glyma14G323610,Glyma17G05670,Glyma11G38230,Glyma10G12350,Glyma10G34020,Glyma03G37760,Glyma20G27660,Glyma02G03320,Glyma15G14810,Glyma08G13060,Glyma10G31160,Glyma17G34170,Glyma17G14680,Glyma12G17450,Glyma10G39320,Glyma03G32690,Glyma19G34250,Glyma08G09540,Glyma06G15860,Glyma14G07700,Glyma05G03930,Glyma06G38190,Glyma05G30260,Glyma03G27470,Glyma07G02940,Glyma14G38650,Glyma09G28920,Glyma15G04280,Glyma15G04350,Glyma19G04140,Glyma08G05720,Glyma17G07940

|           |                                                        |              |                |              |                                                                                                                                                                                                                                                                                                                                                                                                                                                                                                                                                                                                                                                                                                                                                                                                                                                                                                                                                                                                                                                                                                                                                                                                                                                                                                                                                                                                                                                                                                                                                                                                                                                                                                                                                                                                                                             |
|-----------|--------------------------------------------------------|--------------|----------------|--------------|---------------------------------------------------------------------------------------------------------------------------------------------------------------------------------------------------------------------------------------------------------------------------------------------------------------------------------------------------------------------------------------------------------------------------------------------------------------------------------------------------------------------------------------------------------------------------------------------------------------------------------------------------------------------------------------------------------------------------------------------------------------------------------------------------------------------------------------------------------------------------------------------------------------------------------------------------------------------------------------------------------------------------------------------------------------------------------------------------------------------------------------------------------------------------------------------------------------------------------------------------------------------------------------------------------------------------------------------------------------------------------------------------------------------------------------------------------------------------------------------------------------------------------------------------------------------------------------------------------------------------------------------------------------------------------------------------------------------------------------------------------------------------------------------------------------------------------------------|
| GO:016817 | hydrolase<br>activity, acting<br>on acid<br>anhydrides | 118/169<br>5 | 1336/<br>27682 | 3.73E<br>-05 | Glyma20G26160, Glyma16G29040, Glyma18G00700, Glyma13G24260, Glyma04G38360, Glyma12G06530, Glyma06G07410, Glyma07G08120, Glyma03G32530, Glyma01G41150, Glyma12G34330, Glyma04G36240, Glyma10G30060, Glyma02G03070, Glyma06G16700, Glyma20G29060, Glyma11G15520, Glyma09G02490, Glyma06G20200, Glyma0028S00210, Glyma09G028260, Glyma09G02930, Glyma19G38970, Glyma17G34060, Glyma05G34540, Glyma17G08540, Glyma20G16170, Glyma07G01230, Glyma07G07550, Glyma19G31720, Glyma13G17440, Glyma04G04380, Glyma05G34180, Glyma05G25550, Glyma17G10420, Glyma09G38730, Glyma03G29230, Glyma15G02780, Glyma18G07080, Glyma19G39580, Glyma13G35790, Glyma06G15900, Glyma10G32800, Glyma07G07110, Glyma04G05920, Glyma15G13380, Glyma01G07970, Glyma06G21140, Glyma04G06610, Glyma20G23010, Glyma15G10370, Glyma11G04350, Glyma04G41060, Glyma08G09050, Glyma08G46130, Glyma06G18700, Glyma17G01310, Glyma04G07370, Glyma05G33830, Glyma08G41510, Glyma18G46930, Glyma19G38110, Glyma13G10530, Glyma05G27850, Glyma05G01460, Glyma17G34410, Glyma15G20000, Glyma11G19120, Glyma07G00350, Glyma16G21050, Glyma15G42030, Glyma09G05710, Glyma12G04410, Glyma15G00670, Glyma11G37910, Glyma20G37930, Glyma18G08870, Glyma09G34860, Glyma15G00340, Glyma12G33340, Glyma19G35270, Glyma04G01110, Glyma05G03440, Glyma16G10760, Glyma07G09530, Glyma04G34140, Glyma10G02020, Glyma11G04310, Glyma06G05910, Glyma03G30310, Glyma09G08370, Glyma06G21910, Glyma07G11880, Glyma16G27030, Glyma08G05120, Glyma14G40380, Glyma17G30980, Glyma18G45440, Glyma20G38380, Glyma06G20360, Glyma20G34060, Glyma20G29840, Glyma10G28880, Glyma20G38610, Glyma19G34250, Glyma04G39670, Glyma01G42240, Glyma02G09080, Glyma03G33590, Glyma10G35310, Glyma08G23150, Glyma05G31810, Glyma16G33590, Glyma07G02940, Glyma03G36310, Glyma14G07750, Glyma08G16680, Glyma09G08180 |
|-----------|--------------------------------------------------------|--------------|----------------|--------------|---------------------------------------------------------------------------------------------------------------------------------------------------------------------------------------------------------------------------------------------------------------------------------------------------------------------------------------------------------------------------------------------------------------------------------------------------------------------------------------------------------------------------------------------------------------------------------------------------------------------------------------------------------------------------------------------------------------------------------------------------------------------------------------------------------------------------------------------------------------------------------------------------------------------------------------------------------------------------------------------------------------------------------------------------------------------------------------------------------------------------------------------------------------------------------------------------------------------------------------------------------------------------------------------------------------------------------------------------------------------------------------------------------------------------------------------------------------------------------------------------------------------------------------------------------------------------------------------------------------------------------------------------------------------------------------------------------------------------------------------------------------------------------------------------------------------------------------------|

|           |                    |           |             |          |                                                                                                                                                                                                                                                                                                                                                                                                                                                                                                                                                                                                                                                                                                                                                                                                                                                                                                                                                                                                                                                                                                                                                                                                                                                                                                                                                                                                                                                                                                                                                                                                                                                                                                                                                                                                                                                                                                                                                                                                                                                                                                                                                                                                                                                                                                                                                                                                                                                                                                                                                                                                                                                                                                                                                                                                                                                                                                                                                                                                                                                                                                                                                                                                                                                                                                                                                                                                                                                                                                                                                                                                                                                                                                                                                                                                                                                                                                                                                                                                                                                                                                                                                                                                                                                                                                                                                                                                                                                                                                                                                                                                                                                                                                                                                                                                                                                                                                                                                                                                                                                                                                                                                                                                                                                                                                                                                                                                                                                                                                                                                                                           |
|-----------|--------------------|-----------|-------------|----------|-------------------------------------------------------------------------------------------------------------------------------------------------------------------------------------------------------------------------------------------------------------------------------------------------------------------------------------------------------------------------------------------------------------------------------------------------------------------------------------------------------------------------------------------------------------------------------------------------------------------------------------------------------------------------------------------------------------------------------------------------------------------------------------------------------------------------------------------------------------------------------------------------------------------------------------------------------------------------------------------------------------------------------------------------------------------------------------------------------------------------------------------------------------------------------------------------------------------------------------------------------------------------------------------------------------------------------------------------------------------------------------------------------------------------------------------------------------------------------------------------------------------------------------------------------------------------------------------------------------------------------------------------------------------------------------------------------------------------------------------------------------------------------------------------------------------------------------------------------------------------------------------------------------------------------------------------------------------------------------------------------------------------------------------------------------------------------------------------------------------------------------------------------------------------------------------------------------------------------------------------------------------------------------------------------------------------------------------------------------------------------------------------------------------------------------------------------------------------------------------------------------------------------------------------------------------------------------------------------------------------------------------------------------------------------------------------------------------------------------------------------------------------------------------------------------------------------------------------------------------------------------------------------------------------------------------------------------------------------------------------------------------------------------------------------------------------------------------------------------------------------------------------------------------------------------------------------------------------------------------------------------------------------------------------------------------------------------------------------------------------------------------------------------------------------------------------------------------------------------------------------------------------------------------------------------------------------------------------------------------------------------------------------------------------------------------------------------------------------------------------------------------------------------------------------------------------------------------------------------------------------------------------------------------------------------------------------------------------------------------------------------------------------------------------------------------------------------------------------------------------------------------------------------------------------------------------------------------------------------------------------------------------------------------------------------------------------------------------------------------------------------------------------------------------------------------------------------------------------------------------------------------------------------------------------------------------------------------------------------------------------------------------------------------------------------------------------------------------------------------------------------------------------------------------------------------------------------------------------------------------------------------------------------------------------------------------------------------------------------------------------------------------------------------------------------------------------------------------------------------------------------------------------------------------------------------------------------------------------------------------------------------------------------------------------------------------------------------------------------------------------------------------------------------------------------------------------------------------------------------------------------------------------------------------------------------------------------------|
| GO:008150 | biological_process | 1166/1695 | 17817/27682 | 4.13E-05 | Glyma01G37920, Glyma14G35680, Glyma19G41590, Glyma17G09860, Glyma17G08610, Glyma05G25270, Glyma08G06570, Glyma11G10320, Glyma07G15260, Glyma14G37070, Glyma04G01760, Glyma16G24640, Glyma14G35350, Glyma18G43530, Glyma14G04850, Glyma17G04800, Glyma17G17770, Glyma08G03560, Glyma13G26000, Glyma06G15970, Glyma11G15520, Glyma18G51080, Glyma06G08730, Glyma06G07760, Glyma09G32180, Glyma13G26260, Glyma12G08900, Glyma02G08970, Glyma0028S00210, Glyma11G11970, Glyma18G10220, Glyma06G18970, Glyma11G08560, Glyma11G13480, Glyma12G14230, Glyma16G01660, Glyma17G08540, Glyma15G09700, Glyma17G01730, Glyma17G11620, Glyma13G25420, Glyma05G35930, Glyma06G39750, Glyma14G36420, Glyma13G23840, Glyma18G49880, Glyma04G04380, Glyma05G25550, Glyma08G03240, Glyma11G35820, Glyma06G17560, Glyma0021S00410, Glyma02G47820, Glyma13G21820, Glyma11G33210, Glyma06G41880, Glyma09G05580, Glyma07G18500, Glyma03G04380, Glyma05G29970, Glyma05G33240, Glyma20G33590, Glyma06G10060, Glyma04G01610, Glyma15G11650, Glyma10G36320, Glyma12G07120, Glyma02G00490, Glyma02G47230, Glyma15G05680, Glyma07G15500, Glyma18G09670, Glyma02G43200, Glyma04G41630, Glyma02G12030, Glyma15G36110, Glyma20G23010, Glyma07G06620, Glyma01G03200, Glyma16G04120, Glyma15G10370, Glyma18G10990, Glyma18G11590, Glyma06G45490, Glyma06G43050, Glyma09G23330, Glyma11G13120, Glyma18G03120, Glyma20G03040, Glyma18G50450, Glyma04G07370, Glyma09G528100, Glyma08G21340, Glyma20G31530, Glyma15G23310, Glyma18G19670, Glyma12G04330, Glyma07G31310, Glyma13G27840, Glyma07G05660, Glyma13G36500, Glyma05G30650, Glyma16G17760, Glyma03G26080, Glyma10G42870, Glyma15G37390, Glyma07G07290, Glyma17G09940, Glyma13G35080, Glyma08G19860, Glyma01G40760, Glyma13G28750, Glyma18G02960, Glyma01G39540, Glyma10G39470, Glyma06G06380.2, Glyma03G00440, Glyma03G00420, Glyma07G01250, Glyma11G04310, Glyma06G02310, Glyma11G00440, Glyma02G47850.2, Glyma15G37320, Glyma16G32640, Glyma13G40550, Glyma20G33460, Glyma07G09260, Glyma06G21910, Glyma04G03120, Glyma03G41800, Glyma13G38950, Glyma04G36150, Glyma04G16670, Glyma09G08260, Glyma10G28880, Glyma20G34790, Glyma10G38490, Glyma14G11040, Glyma10G29700, Glyma10G33790, Glyma05G03640, Glyma10G38450.2, Glyma11G09070, Glyma17G03650, Glyma14G12880, Glyma02G37720, Glyma12G30410, Glyma04G14770, Glyma01G42770, Glyma05G21420, Glyma03G04740, Glyma18G41270, Glyma17G34780, Glyma19G45280, Glyma02G10420, Glyma09G38820, Glyma20G33320, Glyma02G39190, Glyma11G15530, Glyma03G03590, Glyma01G04800, Glyma05G31450, Glyma13G41800, Glyma19G43700, Glyma15G02430, Glyma06G12160, Glyma09G05550, Glyma12G08200, Glyma09G28260, Glyma07G11240, Glyma18G07460, Glyma11G02190, Glyma06G01460, Glyma09G37580, Glyma08G15610, Glyma03G04780, Glyma15G06390, Glyma14G34710, Glyma06G30860, Glyma13G34770, Glyma07G30260, Glyma02G46670, Glyma14G05060, Glyma09G24220, Glyma07G12060, Glyma11G35320, Glyma16G07060, Glyma07G32720, Glyma07G39870, Glyma03G27150, Glyma03G37490, Glyma18G09380, Glyma08G44690, Glyma05G07650, Glyma10G32800, Glyma18G15970, Glyma05G01450, Glyma07G04560, Glyma14G07940, Glyma12G06920, Glyma15G37240, Glyma19G44690, Glyma13G02620, Glyma13G29410, Glyma15G07040, Glyma06G45340, Glyma10G08040, Glyma08G18760, Glyma09G20260, Glyma18G44940, Glyma06G12150, Glyma09G02180, Glyma13G05640, Glyma03G02610, Glyma09G35860, Glyma13G36900, Glyma11G11500, Glyma04G43480, Glyma19G38110, Glyma14G05300, Glyma14G36960, Glyma06G47470, Glyma12G34500, Glyma12G29730, Glyma15G00450, Glyma13G25110, Glyma15G29980, Glyma17G04470, Glyma13G10040, Glyma09G26710, Glyma14G08920, Glyma15G14030, Glyma16G25540, Glyma09G05710, Glyma01G01630, Glyma03G38620, Glyma15G34720, Glyma18G04440, Glyma06G40980, Glyma15G15080, Glyma12G08840, Glyma03G03360, Glyma07G30750, Glyma07G12130, Glyma10G43690, Glyma02G07770, Glyma04G40150, Glyma04G13670, Glyma04G34770, Glyma06G40670, Glyma18G51950, Glyma09G40650, Glyma19G00230, Glyma02G48150, Glyma10G35610, Glyma09G42010, Glyma10G02020, Glyma14G03380, Glyma06G18150, Glyma13G33560, Glyma06G03160, Glyma15G06040, Glyma08G10950, Glyma08G27000, Glyma13G00370, Glyma19G43290, Glyma09G29460, Glyma14G10820, Glyma03G36090, Glyma13G33730, Glyma17G20070, Glyma18G44010, Glyma15G08530, Glyma02G14310, Glyma11G34490, Glyma13G06490, Glyma11G31410, Glyma14G37890, Glyma15G13950, Glyma11G32970, Glyma05G31810, Glyma09G37650, Glyma12G36440, Glyma18G11010, Glyma16G21370, Glyma08G08000, Glyma10G29200, Glyma18G02160, Glyma03G22640, Glyma20G08780, Glyma08G39340, Glyma10G30020, Glyma04G09210, Glyma02G40320, Glyma11G05960, Glyma17G05250, Glyma02G43080, Glyma12G06320, Glyma19G39680, Glyma12G06530, Glyma09G24590, Glyma01G32360, Glyma09G39660, Glyma01G03410, Glyma19G34580, Glyma12G34330, Glyma10G30060, Glyma15G14020, Glyma07G33200, Glyma06G19630, Glyma12G00380, Glyma02G11140, Glyma13G18690, Glyma18G50510, Glyma09G29080, Glyma13G05430, Glyma13G43090, Glyma01G31840, Glyma20G11610, Glyma09G03190, Glyma13G32900, Glyma04G02160, Glyma12G34390, Glyma12G35390, Glyma11G20180, Glyma09G00300, Glyma11G37170, Glyma06G39990, Glyma20G36390, Glyma15G25450, Glyma17G10420, Glyma02G11110, Glyma03G40860, Glyma09G37370, Glyma02G07460, Glyma19G41210, Glyma14G32210, Glyma07G07110, Glyma04G24380, Glyma10G06090, Glyma07G01890, Glyma19G03620, Glyma07G12010, Glyma09G39200, Glyma19G22790, Glyma16G29380, Glyma13G22760, Glyma04G08600, Glyma15G14080, Glyma20G34690, Glyma17G14830, Glyma05G32070, Glyma11G14960, Glyma05G33830, Glyma06G17420, Glyma11G01800, Gly |
|-----------|--------------------|-----------|-------------|----------|-------------------------------------------------------------------------------------------------------------------------------------------------------------------------------------------------------------------------------------------------------------------------------------------------------------------------------------------------------------------------------------------------------------------------------------------------------------------------------------------------------------------------------------------------------------------------------------------------------------------------------------------------------------------------------------------------------------------------------------------------------------------------------------------------------------------------------------------------------------------------------------------------------------------------------------------------------------------------------------------------------------------------------------------------------------------------------------------------------------------------------------------------------------------------------------------------------------------------------------------------------------------------------------------------------------------------------------------------------------------------------------------------------------------------------------------------------------------------------------------------------------------------------------------------------------------------------------------------------------------------------------------------------------------------------------------------------------------------------------------------------------------------------------------------------------------------------------------------------------------------------------------------------------------------------------------------------------------------------------------------------------------------------------------------------------------------------------------------------------------------------------------------------------------------------------------------------------------------------------------------------------------------------------------------------------------------------------------------------------------------------------------------------------------------------------------------------------------------------------------------------------------------------------------------------------------------------------------------------------------------------------------------------------------------------------------------------------------------------------------------------------------------------------------------------------------------------------------------------------------------------------------------------------------------------------------------------------------------------------------------------------------------------------------------------------------------------------------------------------------------------------------------------------------------------------------------------------------------------------------------------------------------------------------------------------------------------------------------------------------------------------------------------------------------------------------------------------------------------------------------------------------------------------------------------------------------------------------------------------------------------------------------------------------------------------------------------------------------------------------------------------------------------------------------------------------------------------------------------------------------------------------------------------------------------------------------------------------------------------------------------------------------------------------------------------------------------------------------------------------------------------------------------------------------------------------------------------------------------------------------------------------------------------------------------------------------------------------------------------------------------------------------------------------------------------------------------------------------------------------------------------------------------------------------------------------------------------------------------------------------------------------------------------------------------------------------------------------------------------------------------------------------------------------------------------------------------------------------------------------------------------------------------------------------------------------------------------------------------------------------------------------------------------------------------------------------------------------------------------------------------------------------------------------------------------------------------------------------------------------------------------------------------------------------------------------------------------------------------------------------------------------------------------------------------------------------------------------------------------------------------------------------------------------------------------------------------------------|

ma06G42800,Glyma02G04490,Glyma06G09770,Glyma14G05050,Glyma13G36730,Glyma06G15220,Glyma03G38280,Glyma13G34290,Glyma15G23150,Glyma02G45150.2,Glyma11G25250,Glyma13G40310,Glyma11G34210,Glyma04G01440,Glyma10G29970,Glyma09G19730,Glyma09G07590,Glyma05G35710,Glyma01G22910,Glyma11G19170,Glyma13G16540,Glyma19G38720,Glyma10G35220,Glyma06G05770,Glyma06G06080,Glyma19G07410,Glyma20G01060,Glyma05G33270,Glyma08G10900,Glyma07G11590,Glyma19G05800,Glyma08G17190,Glyma13G35740,Glyma02G45500,Glyma03G05440,Glyma04G08620,Glyma13G43950,Glyma12G10580,Glyma12G09220,Glyma06G04790,Glyma11G14390,Glyma02G14450,Glyma10G42470,Glyma10G31520,Glyma04G35110,Glyma03G30970,Glyma20G23080,Glyma13G06620,Glyma17G38210,Glyma15G34810,Glyma08G13040,Glyma16G32700,Glyma12G08030,Glyma06G03950,Glyma10G30360,Glyma01G01750,Glyma07G29630,Glyma10G40910,Glyma10G23520,Glyma08G42880,Glyma05G08770,Glyma02G13420,Glyma12G30780,Glyma13G33620,Glyma09G39390,Glyma16G27250,Glyma18G45340,Glyma09G04710,Glyma03G07540,Glyma05G33790,Glyma11G10100,Glyma10G34970,Glyma05G08730,Glyma07G00340,Glyma08G20650,Glyma03G32900,Glyma18G02520,Glyma17G15320,Glyma04G35730,Glyma10G01820,Glyma03G26540,Glyma18G50540,Glyma09G03400,Glyma13G33320,Glyma14G12420,Glyma08G02980,Glyma18G09980,Glyma16G25600,Glyma02G06700,Glyma02G15150,Glyma02G01770,Glyma12G16450,Glyma01G41150,Glyma17G08000,Glyma16G29670,Glyma02G42420,Glyma07G00440,Glyma14G10790,Glyma10G05260,Glyma17G26440,Glyma16G00480,Glyma16G30130,Glyma09G35140,Glyma16G32830,Glyma16G32480,Glyma10G13720,Glyma03G27360,Glyma06G18160,Glyma07G02990,Glyma18G08940,Glyma20G00790,Glyma20G39110,Glyma20G27800,Glyma14G04890,Glyma06G47110,Glyma08G14520,Glyma18G45200,Glyma17G10950,Glyma20G35420,Glyma18G08220,Glyma07G07320,Glyma06G09490,Glyma14G04700,Glyma15G11570,Glyma12G09680,Glyma17G07280,Glyma07G39300,Glyma09G03660,Glyma09G052470,Glyma06G40780,Glyma05G21910,Glyma14G03140,Glyma15G42640,Glyma07G09030,Glyma11G19880,Glyma15G14550,Glyma14G03030,Glyma13G05130,Glyma04G06610,Glyma09G30070,Glyma18G49060,Glyma18G45070,Glyma08G18860,Glyma17G36440,Glyma11G07760,Glyma17G02560,Glyma19G37820,Glyma13G42950,Glyma09G05540,Glyma16G26330,Glyma05G31190,Glyma09G37230,Glyma17G07860,Glyma05G09060,Glyma14G37440,Glyma09G13540,Glyma06G40740,Glyma07G09170,Glyma06G02010,Glyma04G33990,Glyma12G04410,Glyma05G05990,Glyma16G10080,Glyma07G31140,Glyma12G36570,Glyma18G04130,Glyma18G08870,Glyma13G38460,Glyma17G01570,Glyma11G11410,Glyma02G48100,Glyma08G22690,Glyma10G32990,Glyma06G40350,Glyma07G10460,Glyma14G29130,Glyma08G15360,Glyma15G02750,Glyma11G05140,Glyma19G00650,Glyma12G31840,Glyma08G47730,Glyma15G01270,Glyma12G30660,Glyma18G42700,Glyma07G09530,Glyma02G43440,Glyma19G33030,Glyma11G32610,Glyma10G38580,Glyma08G14900,Glyma12G34110,Glyma03G32160,Glyma19G40560,Glyma10G12350,Glyma05G00920,Glyma01G20710,Glyma10G34020,Glyma03G37760,Glyma09G36070,Glyma16G27030,Glyma17G34400,Glyma02G03320,Glyma11G04560,Glyma10G31160,Glyma17G34170,Glyma12G17450,Glyma08G45020,Glyma10G39320,Glyma16G08460,Glyma08G39510.2,Glyma17G34480,Glyma08G09540,Glyma10G04480,Glyma06G15860,Glyma05G00330,Glyma03G27470,Glyma18G10470,Glyma15G04350,Glyma19G04140,Glyma13G41790,Glyma04G04510,Glyma08G24510,Glyma10G34000,Glyma07G14010,Glyma11G07090,Glyma20G24040,Glyma18G00700,Glyma05G32340,Glyma08G00740,Glyma16G09890,Glyma11G07050,Glyma06G07410,Glyma11G20030,Glyma08G28460,Glyma04G37770,Glyma03G37870,Glyma17G02290,Glyma06G47380,Glyma07G17380,Glyma09G31840,Glyma09G37780,Glyma03G04700,Glyma03G03700,Glyma04G33110,Glyma03G00800,Glyma13G43670,Glyma09G00810,Glyma04G09340,Glyma14G34480,Glyma08G26940,Glyma16G28400,Glyma10G42490,Glyma10G35560,Glyma08G22520,Glyma20G24710,Glyma08G03660,Glyma10G36220,Glyma06G42640,Glyma17G33190,Glyma09G34110,Glyma14G33400,Glyma14G05020,Glyma06G34940,Glyma18G06790,Glyma12G05460.3,Glyma18G32680,Glyma06G45590,Glyma18G48600,Glyma09G40440,Glyma14G33700,Glyma13G21030,Glyma01G07970,Glyma10G29000,Glyma16G24940,Glyma16G04910,Glyma15G05190,Glyma17G09690,Glyma08G46130,Glyma09G33170,Glyma02G07740,Glyma08G10910,Glyma11G34170,Glyma20G24800,Glyma15G40830,Glyma19G30650,Glyma06G41430,Glyma19G29860,Glyma14G09950,Glyma14G24590,Glyma12G09050,Glyma05G26960,Glyma18G40680,Glyma11G03800,Glyma17G17120,Glyma02G38280,Glyma09G21970,Glyma08G01180,Glyma12G09980,Glyma18G48210,Glyma09G09390,Glyma17G17780,Glyma20G33200,Glyma18G48520,Glyma13G02910,Glyma06G17550,Glyma20G34340,Glyma06G08480,Glyma18G05020,Glyma11G09060,Glyma18G01240,Glyma03G00280,Glyma09G34860,Glyma13G32670,Glyma10G03000,Glyma10G28890,Glyma08G12540,Glyma09G07900,Glyma15G23560,Glyma01G10100,Glyma01G08600,Glyma13G23570,Glyma14G06570,Glyma15G02520,Glyma11G04020,Glyma04G39120,Glyma15G37670,Glyma12G17340,Glyma12G07200,Glyma03G38480,Glyma15G13640,Glyma04G42830,Glyma05G08230,Glyma14G40380,Glyma08G13150,Glyma17G33470,Glyma11G13460,Glyma07G00670,Glyma03G40770,Glyma15G19810,Glyma14G06970,Glyma16G02290,Glyma14G12710,Glyma20G29480,Glyma17G10710,Glyma13G34960,Glyma16G22370,Glyma10G34490,Glyma14G11030,Glyma19G00450,Glyma02G09080,Glyma08G13300,Glyma09G00360,Glyma08G40030,Glyma05G10630,Glyma05G03100,Glyma07G31350,Glyma17G17010,Glyma15G10610,Glyma09G41690,Glyma02G40850,Glyma16G02340,Glyma17G11760,Glyma06G11940,Glyma04G43190,Glyma13G26680,Glyma19G31950,Glyma19G41050,Glyma06G44970,Glyma16G04680,Glyma19G27420,Glyma18G44800,Glyma15G14200,Glyma15G01150,Glyma17G04710,Glyma02G13540,Glyma18G52070,Glyma05G24830,Glyma16G05410,Glyma20G33390,Glyma06G13880,Glyma04G11870,Glyma04G42370,Glyma08G44730,Glyma14G00380,Glyma16G29780,Glyma11G18350,Glyma17G10120,Glyma10G03200,Glyma10G43400,Glyma15G42080,Glyma20G36750,Glyma16G32960,Glyma18G14560,Glyma12G34430,Glyma08G40810,Glyma08G40920,Glyma11G06500,Glyma16G06670,Glyma18G48350,Glyma16G01940,Glyma09G07040,Glyma16G34290,Glyma12G03140,Glyma01G39380,Glyma10G38810,Glyma02G46070,Glyma13G37440,Glyma08G06730,Glyma08G08550,Glyma03G18430,Glyma11G13960,Glyma08G06520,Glyma16G03780,Glyma16G04050,Glyma01G37090,Glyma14G22170,Glyma01G01500,Glyma14G39930,Glyma04G27730,Glyma15G18310,Glyma15G21010,Glyma02G36720,Glyma08G06330,Glyma18G47590,Glyma06G40110,Glyma06G08880,Glyma02G13630,Glyma18G50650,Glyma02G15290,Glyma08G03320,Glyma09G38460,Glyma05G30230,Glyma14G03040,Glyma16G33950,Glyma01G34780,Glyma20G25660,Glyma01G39760,Glyma09G02280,Glyma20G27720,Glyma08G14370,Glyma03G10980,Glyma09G07100,Glyma18G50440,Glyma06G14920,Glyma09G34750,Glyma19G38040,Glyma05G37270,Glyma18G46930,Glyma17G11130,Glyma04G30870,Glyma10G33310,Glyma05G01460,Glyma08G10080,Glyma18G51960,Glyma03G24260,Glyma15G17430,Glyma14G06340,Glyma07G00350,Glyma13G02420,Glyma09G41570,Glyma10G04530,Glyma08G12070,Glyma11G35100,Glyma19G07330,Glyma12G36820,Glyma19G29170,Glyma03G05400,Glyma12G33340,Glyma07G29650,Glyma13G32300,Glyma15G00950,Glyma15G37140,Glyma03G03640,Glyma13G10200,Glyma16G05850,Glyma04G01110,Glyma03G40290,Glyma15G04850,Glyma16G32710,Glyma16G10760,Glyma09G29900,Glyma19G30630,Glyma05G28150,Glyma04G00580,Glyma20G36220,Glyma07G06310,Glyma01G28880,Glyma06G10440,Glyma13G26250,Glyma18G08030,Glyma05G30030,Glyma19G00610,Glyma11G05720,Glyma04G11640,Glyma09G26960,Glyma19G42900,Glyma12G36780,Glyma13G38120,Glyma07G36500.4,Glyma12G17360,Glyma03G24720,Glyma10G12530,Glyma17G10370,Glyma1

0G07870,Glyma02G05790,Glyma01G44150,Glyma01G45470,Glyma20G27510,Glyma06G15840,Glyma09G06570,Glyma06G48250,Glyma08G23150,Glyma17G07010,Glyma12G08640,Glyma15G06870,Glyma15G05350,Glyma11G02560,Glyma09G08180,Glyma14G03310,Glyma05G26640,Glyma04G09600,Glyma06G15940,Glyma05G36580,Glyma08G21720,Glyma14G36660,Glyma13G36600,Glyma15G13190,Glyma10G03170,Glyma02G04500,Glyma15G08040,Glyma09G30430,Glyma16G08470,Glyma19G05020,Glyma19G31590,Glyma04G09670,Glyma08G43930,Glyma16G08560,Glyma16G25010,Glyma09G34400,Glyma17G34960,Glyma19G31230,Glyma09G31650,Glyma17G34190,Glyma01G40080,Glyma07G10090,Glyma18G01960,Glyma11G09770,Glyma06G40690,Glyma02G10710,Glyma14G40460,Glyma11G29490,Glyma08G42790,Glyma06G04540,Glyma07G07550,Glyma13G17440,Glyma01G38780,Glyma12G20860,Glyma02G45800,Glyma05G01380,Glyma13G32770,Glyma16G34030,Glyma17G03300,Glyma08G08500,Glyma03G32550,Glyma07G32200,Glyma09G31060,Glyma05G26040,Glyma11G13810,Glyma07G04740,Glyma07G00840,Glyma17G16950,Glyma17G04120,Glyma11G10240,Glyma06G21140,Glyma15G39150,Glyma09G08550,Glyma0048S00320,Glyma12G01380,Glyma04G03250,Glyma17G29990,Glyma08G14400,Glyma17G14760,Glyma07G32590,Glyma02G11290,Glyma17G01500,Glyma16G28070,Glyma07G06610,Glyma20G23930,Glyma07G17140,Glyma09G24410,Glyma12G37040,Glyma05G07540,Glyma13G18510,Glyma13G27810,Glyma10G07500,Glyma19G29820,Glyma18G43390,Glyma16G24610,Glyma11G01370,Glyma14G37620,Glyma03G40720,Glyma13G26280,Glyma09G33120,Glyma18G09290,Glyma14G04930,Glyma18G16060,Glyma03G32210,Glyma09G28040,Glyma20G33570,Glyma17G05880,Glyma20G38370,Glyma13G17710,Glyma15G01010,Glyma08G16150,Glyma18G15150,Glyma14G08260,Glyma07G31660,Glyma02G42270,Glyma08G39070,Glyma12G32880,Glyma06G19310,Glyma03G05640,Glyma02G04310,Glyma07G31630,Glyma18G52290,Glyma04G09580,Glyma19G37210,Glyma03G22960,Glyma03G02310,Glyma02G48020,Glyma01G27440,Glyma20G34160,Glyma03G30310,Glyma12G04200,Glyma14G01730,Glyma15G13290,Glyma10G39540,Glyma03G32730,Glyma15G00590,Glyma13G25970,Glyma01G44350,Glyma18G11110,Glyma06G47650,Glyma08G21530,Glyma20G38380,Glyma20G34060,Glyma18G03800,Glyma05G34160,Glyma20G29840,Glyma08G40980,Glyma06G04140,Glyma20G24840,Glyma13G37080,Glyma01G42240,Glyma12G30010,Glyma18G06170,Glyma02G05210,Glyma14G02650,Glyma06G17270,Glyma17G02080,Glyma01G41600,Glyma16G33590,Glyma14G07750,Glyma05G00310,Glyma08G16680,Glyma09G39800,Glyma20G18980,Glyma19G01850,Glyma10G06500,Glyma11G02150,Glyma02G09370,Glyma10G41560,Glyma13G43480,Glyma15G23620,Glyma17G09700,Glyma05G37970,Glyma01G43190,Glyma09G39000,Glyma19G35620,Glyma10G41990,Glyma04G40970,Glyma20G06780,Glyma03G31820,Glyma05G36130,Glyma09G29980,Glyma01G36170,Glyma07G16260,Glyma08G44620,Glyma06G20200,Glyma02G42740,Glyma20G27790,Glyma02G33090,Glyma03G08980,Glyma09G00280,Glyma07G09820,Glyma13G26170,Glyma14G01440,Glyma09G02930,Glyma15G37290,Glyma20G38860,Glyma20G35970,Glyma09G02960,Glyma0220S00210,Glyma18G53590,Glyma17G16070,Glyma01G00960,Glyma09G40150,Glyma07G03160,Glyma09G27030,Glyma06G07380,Glyma09G23150,Glyma10G38370,Glyma02G03760,Glyma02G02580,Glyma18G14770,Glyma16G29510,Glyma09G00580,Glyma18G06570,Glyma18G38470,Glyma01G36980,Glyma14G01980,Glyma18G52110,Glyma12G01480,Glyma06G47870,Glyma02G15490,Glyma16G27330,Glyma10G40900,Glyma08G10880,Glyma12G02880,Glyma05G36200,Glyma19G43270,Glyma09G32510,Glyma20G30100,Glyma02G44040,Glyma18G48470,Glyma18G47140,Glyma07G31380,Glyma20G23480,Glyma06G40710,Glyma03G29280,Glyma06G40920,Glyma07G39980,Glyma05G23260,Glyma01G29540,Glyma06G11820,Glyma16G01090,Glyma15G34620,Glyma18G01530,Glyma11G02620,Glyma05G01510,Glyma10G03870,Glyma13G26970,Glyma07G11320,Glyma08G12750,Glyma13G34810,Glyma08G21740,Glyma15G00670,Glyma17G09120,Glyma03G00540,Glyma18G17290,Glyma12G34890,Glyma15G00340,Glyma07G05820,Glyma07G03660,Glyma18G10610,Glyma10G08700,Glyma19G41890,Glyma04G33950,Glyma01G34560,Glyma05G03440,Glyma05G35800,Glyma05G33540,Glyma18G43980,Glyma02G39150,Glyma06G21440,Glyma13G42680,Glyma06G12510,Glyma05G23680,Glyma15G36890,Glyma13G23610,Glyma17G05670,Glyma11G38230,Glyma03G39320,Glyma20G27660,Glyma10G42350,Glyma15G14810,Glyma08G13060,Glyma15G14210,Glyma17G14680,Glyma03G32690,Glyma19G34250,Glyma05G03310,Glyma03G42000,Glyma14G07700,Glyma15G05750,Glyma13G04800,Glyma05G03930,Glyma20G08160,Glyma06G38190,Glyma05G30260,Glyma07G02940,Glyma14G38650,Glyma09G28920,Glyma15G04280,Glyma05G27840,Glyma08G05720,Glyma11G03140,Glyma17G07940,Glyma08G43170

Glyma13G25420,Glyma01G27440,Glyma06G39990,Glyma13G26250,Glyma18G09980,Glyma15G37320,Glyma15G13290,Glyma02G03760,Glyma18G51960,Glyma16G34030,Glyma16G03780,Glyma15G37390,Glyma13G25970,Glyma06G17560,Glyma06G40740,Glyma12G16450,Glyma20G06780,Glyma06G41880,Glyma06G40780,Glyma06G47650,Glyma03G40770,Glyma13G26000,Glyma07G07110,Glyma10G32800,Glyma18G09290,Glyma16G10080,Glyma06G40980,Glyma03G05400,Glyma16G25010,Glyma18G09670,Glyma09G29080,Glyma16G24940,Glyma18G10610,Glyma15G37140,Glyma06G40690,Glyma16G33950,Glyma15G37290,Glyma16G33590,Glyma18G10470,Glyma03G05640,Glyma18G51950,Glyma03G04780,Glyma06G41430,Glyma06G40710,Glyma08G43170

GO:006952      defense response      45/1695      395/27682      4.74E-05



|           |                                                                                    |          |            |          |                                                                                                                                                                                                                                                                                                                                                                                                                                                                                                                                                                                                                                                                                                                                                                                                                                                                                                                                                                                                                                                                                                                                                                                                                                                                                                                                                                                                                                                                                                                                                                                                                                                                                                                                                                                |
|-----------|------------------------------------------------------------------------------------|----------|------------|----------|--------------------------------------------------------------------------------------------------------------------------------------------------------------------------------------------------------------------------------------------------------------------------------------------------------------------------------------------------------------------------------------------------------------------------------------------------------------------------------------------------------------------------------------------------------------------------------------------------------------------------------------------------------------------------------------------------------------------------------------------------------------------------------------------------------------------------------------------------------------------------------------------------------------------------------------------------------------------------------------------------------------------------------------------------------------------------------------------------------------------------------------------------------------------------------------------------------------------------------------------------------------------------------------------------------------------------------------------------------------------------------------------------------------------------------------------------------------------------------------------------------------------------------------------------------------------------------------------------------------------------------------------------------------------------------------------------------------------------------------------------------------------------------|
| GO:016462 | pyrophosphatase activity                                                           | 114/1695 | 1296/27682 | 5.98E-05 | Glyma20G26160, Glyma16G29040, Glyma18G00700, Glyma13G24260, Glyma04G38360, Glyma12G06530, Glyma06G07410, Glyma07G08120, Glyma03G32530, Glyma01G41150, Glyma12G34330, Glyma04G36240, Glyma10G30060, Glyma02G03070, Glyma06G16700, Glyma20G29060, Glyma11G15520, Glyma06G20200, Glyma0028S00210, Glyma09G28260, Glyma09G02930, Glyma19G38970, Glyma17G34060, Glyma05G34540, Glyma17G08540, Glyma20G16170, Glyma07G07550, Glyma19G31720, Glyma13G17440, Glyma04G04380, Glyma05G34180, Glyma05G25550, Glyma17G10420, Glyma09G38730, Glyma03G29230, Glyma18G07080, Glyma19G39580, Glyma13G35790, Glyma06G15900, Glyma10G32800, Glyma07G07110, Glyma04G05920, Glyma01G07970, Glyma06G21140, Glyma04G06610, Glyma20G23010, Glyma15G10370, Glyma11G04350, Glyma04G41060, Glyma08G09050, Glyma08G46130, Glyma06G18700, Glyma17G01310, Glyma04G07370, Glyma05G33830, Glyma08G41510, Glyma18G46930, Glyma19G38110, Glyma05G27850, Glyma13G10530, Glyma05G01460, Glyma17G34410, Glyma15G20000, Glyma11G19120, Glyma07G00350, Glyma16G21050, Glyma15G42030, Glyma09G05710, Glyma12G04410, Glyma15G00670, Glyma11G37910, Glyma20G37930, Glyma18G08870, Glyma09G34860, Glyma15G00340, Glyma12G33340, Glyma19G35270, Glyma04G01110, Glyma05G03440, Glyma16G10760, Glyma07G09530, Glyma04G34140, Glyma10G02020, Glyma11G04310, Glyma06G05910, Glyma03G30310, Glyma09G08370, Glyma06G21910, Glyma07G11880, Glyma16G27030, Glyma08G05120, Glyma14G40380, Glyma17G30980, Glyma18G45440, Glyma20G38380, Glyma06G20360, Glyma20G34060, Glyma20G29840, Glyma10G28880, Glyma20G38610, Glyma19G34250, Glyma04G39670, Glyma01G42240, Glyma02G09080, Glyma03G33590, Glyma10G35310, Glyma08G23150, Glyma05G31810, Glyma16G33590, Glyma07G02940, Glyma03G36310, Glyma14G07750, Glyma08G16680, Glyma09G08180 |
| GO:017111 | nucleoside-triphosphatase activity                                                 | 112/1695 | 1271/27682 | 6.45E-05 | Glyma20G26160, Glyma16G29040, Glyma18G00700, Glyma13G24260, Glyma04G38360, Glyma12G06530, Glyma06G07410, Glyma07G08120, Glyma03G32530, Glyma01G41150, Glyma12G34330, Glyma04G36240, Glyma10G30060, Glyma02G03070, Glyma06G16700, Glyma20G29060, Glyma11G15520, Glyma06G20200, Glyma0028S00210, Glyma09G28260, Glyma09G02930, Glyma19G38970, Glyma17G34060, Glyma05G34540, Glyma17G08540, Glyma20G16170, Glyma07G07550, Glyma19G31720, Glyma04G04380, Glyma13G17440, Glyma05G34180, Glyma05G25550, Glyma17G10420, Glyma09G38730, Glyma03G29230, Glyma18G07080, Glyma19G39580, Glyma13G35790, Glyma06G15900, Glyma10G32800, Glyma07G07110, Glyma04G05920, Glyma01G07970, Glyma06G21140, Glyma04G06610, Glyma20G23010, Glyma15G10370, Glyma11G04350, Glyma04G41060, Glyma08G09050, Glyma08G46130, Glyma06G18700, Glyma17G01310, Glyma04G07370, Glyma05G33830, Glyma08G41510, Glyma18G46930, Glyma19G38110, Glyma05G27850, Glyma13G10530, Glyma05G01460, Glyma17G34410, Glyma15G20000, Glyma11G19120, Glyma16G21050, Glyma15G42030, Glyma09G05710, Glyma12G04410, Glyma15G00670, Glyma11G37910, Glyma20G37930, Glyma18G08870, Glyma09G34860, Glyma15G00340, Glyma12G33340, Glyma19G35270, Glyma04G01110, Glyma05G03440, Glyma16G10760, Glyma07G09530, Glyma04G34140, Glyma10G02020, Glyma11G04310, Glyma06G05910, Glyma03G30310, Glyma09G08370, Glyma06G21910, Glyma07G11880, Glyma16G27030, Glyma08G05120, Glyma14G40380, Glyma17G30980, Glyma18G45440, Glyma20G38380, Glyma06G20360, Glyma20G34060, Glyma20G29840, Glyma20G38610, Glyma19G34250, Glyma04G39670, Glyma01G42240, Glyma02G09080, Glyma03G33590, Glyma10G35310, Glyma08G23150, Glyma05G31810, Glyma16G33590, Glyma07G02940, Glyma03G36310, Glyma14G07750, Glyma08G16680, Glyma09G08180                               |
| GO:016818 | hydrolase activity, acting on acid anhydrides, in phosphorus-containing anhydrides | 114/1695 | 1317/27682 | 1.15E-04 | Glyma20G26160, Glyma16G29040, Glyma18G00700, Glyma13G24260, Glyma04G38360, Glyma12G06530, Glyma06G07410, Glyma07G08120, Glyma03G32530, Glyma01G41150, Glyma12G34330, Glyma04G36240, Glyma10G30060, Glyma02G03070, Glyma06G16700, Glyma20G29060, Glyma11G15520, Glyma06G20200, Glyma0028S00210, Glyma09G28260, Glyma09G02930, Glyma19G38970, Glyma17G34060, Glyma05G34540, Glyma17G08540, Glyma20G16170, Glyma07G07550, Glyma19G31720, Glyma13G17440, Glyma04G04380, Glyma05G34180, Glyma05G25550, Glyma17G10420, Glyma09G38730, Glyma03G29230, Glyma18G07080, Glyma19G39580, Glyma13G35790, Glyma06G15900, Glyma10G32800, Glyma07G07110, Glyma04G05920, Glyma01G07970, Glyma06G21140, Glyma04G06610, Glyma20G23010, Glyma15G10370, Glyma11G04350, Glyma04G41060, Glyma08G09050, Glyma08G46130, Glyma06G18700, Glyma17G01310, Glyma04G07370, Glyma05G33830, Glyma08G41510, Glyma18G46930, Glyma19G38110, Glyma05G27850, Glyma13G10530, Glyma05G01460, Glyma17G34410, Glyma15G20000, Glyma11G19120, Glyma16G21050, Glyma15G42030, Glyma09G05710, Glyma12G04410, Glyma15G00670, Glyma11G37910, Glyma20G37930, Glyma18G08870, Glyma09G34860, Glyma15G00340, Glyma12G33340, Glyma19G35270, Glyma04G01110, Glyma05G03440, Glyma16G10760, Glyma07G09530, Glyma04G34140, Glyma10G02020, Glyma11G04310, Glyma06G05910, Glyma03G30310, Glyma09G08370, Glyma06G21910, Glyma07G11880, Glyma16G27030, Glyma08G05120, Glyma14G40380, Glyma17G30980, Glyma18G45440, Glyma20G38380, Glyma06G20360, Glyma20G34060, Glyma20G29840, Glyma20G38610, Glyma19G34250, Glyma04G39670, Glyma01G42240, Glyma02G09080, Glyma03G33590, Glyma10G35310, Glyma08G23150, Glyma05G31810, Glyma16G33590, Glyma07G02940, Glyma03G36310, Glyma14G07750, Glyma08G16680, Glyma09G08180                               |
| GO:004553 | hydrolase activity, hydrolyzing O-glycosyl compounds                               | 60/1695  | 605/27682  | 1.68E-04 | Glyma05G26960, Glyma16G04680, Glyma11G11500, Glyma06G15940, Glyma04G30870, Glyma15G23310, Glyma18G19670, Glyma05G36580, Glyma09G21970, Glyma17G05250, Glyma14G05300, Glyma05G24830, Glyma14G37070, Glyma07G07290, Glyma16G29780, Glyma14G04850, Glyma11G18350, Glyma19G31590, Glyma08G40810, Glyma13G41800, Glyma02G07770, Glyma15G02750, Glyma18G52290, Glyma14G34480, Glyma19G00230, Glyma13G42680, Glyma08G26940, Glyma03G00440, Glyma07G01250, Glyma15G37670, Glyma06G03160, Glyma17G33190, Glyma08G27000, Glyma07G12060, Glyma04G03120, Glyma17G03300, Glyma17G07280, Glyma18G06570, Glyma13G38120, Glyma01G36980, Glyma19G34250, Glyma11G13810, Glyma14G39930, Glyma12G01480, Glyma14G03140, Glyma02G05790, Glyma01G45470, Glyma07G12010, Glyma09G39200, Glyma14G07700, Glyma06G17270, Glyma03G27470, Glyma06G12150, Glyma09G28920, Glyma11G07760, Glyma02G07740, Glyma05G08730, Glyma09G07100, Glyma08G20650, Glyma06G14920, Glyma08G39340                                                                                                                                                                                                                                                                                                                                                                                                                                                                                                                                                                                                                                                                                                                                                                                                                              |

|           |                                              |         |           |          |                                                                                                                                                                                                                                                                                                                                                                                                                                                                                                                                                                                                                                                                                                                                                                                                                                                                                                                                                                 |
|-----------|----------------------------------------------|---------|-----------|----------|-----------------------------------------------------------------------------------------------------------------------------------------------------------------------------------------------------------------------------------------------------------------------------------------------------------------------------------------------------------------------------------------------------------------------------------------------------------------------------------------------------------------------------------------------------------------------------------------------------------------------------------------------------------------------------------------------------------------------------------------------------------------------------------------------------------------------------------------------------------------------------------------------------------------------------------------------------------------|
| GO:016798 | hydrolase activity, acting on glycosyl bonds | 62/1695 | 632/27682 | 1.78E-04 | Glyma05G26960, Glyma16G04680, Glyma11G11500, Glyma06G15940, Glyma15G23310, Glyma04G30870, Glyma18G19670, Glyma05G36580, Glyma09G21970, Glyma17G05250, Glyma14G05300, Glyma05G24830, Glyma14G37070, Glyma07G07290, Glyma16G29780, Glyma14G04850, Glyma11G18350, Glyma19G31590, Glyma08G40810, Glyma13G41800, Glyma06G12160, Glyma02G07770, Glyma15G02750, Glyma17G11670, Glyma18G52290, Glyma14G34480, Glyma19G00230, Glyma13G42680, Glyma08G26940, Glyma03G00440, Glyma07G01250, Glyma15G37670, Glyma06G03160, Glyma17G33190, Glyma08G2700, Glyma07G12060, Glyma04G03120, Glyma17G03300, Glyma17G07280, Glyma18G06570, Glyma13G38120, Glyma01G36980, Glyma11G13810, Glyma14G39930, Glyma12G01480, Glyma14G03140, Glyma02G05790, Glyma01G45470, Glyma07G12010, Glyma09G39200, Glyma14G07700, Glyma06G17270, Glyma03G27470, Glyma06G12150, Glyma09G28920, Glyma11G07760, Glyma02G07740, Glyma05G08730, Glyma09G07100, Glyma08G20650, Glyma06G14920, Glyma08G39340 |
|-----------|----------------------------------------------|---------|-----------|----------|-----------------------------------------------------------------------------------------------------------------------------------------------------------------------------------------------------------------------------------------------------------------------------------------------------------------------------------------------------------------------------------------------------------------------------------------------------------------------------------------------------------------------------------------------------------------------------------------------------------------------------------------------------------------------------------------------------------------------------------------------------------------------------------------------------------------------------------------------------------------------------------------------------------------------------------------------------------------|

|           |                    |          |            |          |                                                                                                                                                                                                                                                                                                                                                                                                                                                                                                                                                                                                                                                                                                                                                                                                                                                                                                                                                                                                                                                                                                                                                                                                                                                                                                                                                                                                                                                                                                                                                                                                                                                                                                                                                                                                                                                                                                                                                                                                                                                                                                                                                                                                                                                                                                                                                                                                                                                                                                                                                                                                                                                                                                                                                                                                                                                                                                                                                                                                                                                                                                                                                                                                                                                                                                                                                                                                                                                                                                                                                                                                                                                                                                                                                                                                                                                                                                                                                                                                                                                                                                                                                                                                                                                                                                                                                                                                                                                                                                                                                                                                                                                                                                                                                                                                |
|-----------|--------------------|----------|------------|----------|------------------------------------------------------------------------------------------------------------------------------------------------------------------------------------------------------------------------------------------------------------------------------------------------------------------------------------------------------------------------------------------------------------------------------------------------------------------------------------------------------------------------------------------------------------------------------------------------------------------------------------------------------------------------------------------------------------------------------------------------------------------------------------------------------------------------------------------------------------------------------------------------------------------------------------------------------------------------------------------------------------------------------------------------------------------------------------------------------------------------------------------------------------------------------------------------------------------------------------------------------------------------------------------------------------------------------------------------------------------------------------------------------------------------------------------------------------------------------------------------------------------------------------------------------------------------------------------------------------------------------------------------------------------------------------------------------------------------------------------------------------------------------------------------------------------------------------------------------------------------------------------------------------------------------------------------------------------------------------------------------------------------------------------------------------------------------------------------------------------------------------------------------------------------------------------------------------------------------------------------------------------------------------------------------------------------------------------------------------------------------------------------------------------------------------------------------------------------------------------------------------------------------------------------------------------------------------------------------------------------------------------------------------------------------------------------------------------------------------------------------------------------------------------------------------------------------------------------------------------------------------------------------------------------------------------------------------------------------------------------------------------------------------------------------------------------------------------------------------------------------------------------------------------------------------------------------------------------------------------------------------------------------------------------------------------------------------------------------------------------------------------------------------------------------------------------------------------------------------------------------------------------------------------------------------------------------------------------------------------------------------------------------------------------------------------------------------------------------------------------------------------------------------------------------------------------------------------------------------------------------------------------------------------------------------------------------------------------------------------------------------------------------------------------------------------------------------------------------------------------------------------------------------------------------------------------------------------------------------------------------------------------------------------------------------------------------------------------------------------------------------------------------------------------------------------------------------------------------------------------------------------------------------------------------------------------------------------------------------------------------------------------------------------------------------------------------------------------------------------------------------------------------------------------|
| GO:016787 | hydrolase activity | 307/1695 | 4203/27682 | 3.86E-04 | Glyma19G41590, Glyma06G15940, Glyma05G36580, Glyma20G26160, Glyma17G05250, Glyma20G24570, Glyma18G00700, Glyma04G38360, Glyma13G24260, Glyma12G06530, Glyma06G07410, Glyma07G08120, Glyma14G37070, Glyma12G34330, Glyma14G04850, Glyma10G30060, Glyma02G03070, Glyma17G04800, Glyma19G31590, Glyma06G16700, Glyma11G15520, Glyma09G02490, Glyma06G08730, Glyma0028S00210, Glyma18G49000, Glyma09G00810, Glyma20G00270, Glyma10G12660, Glyma05G34540, Glyma12G35390, Glyma14G34480, Glyma17G08540, Glyma15G09700, Glyma20G16170, Glyma06G04540, Glyma08G26940, Glyma07G07550, Glyma08G22520, Glyma05G35930, Glyma19G31720, Glyma11G37170, Glyma10G36220, Glyma13G17440, Glyma06G42640, Glyma04G04380, Glyma05G34180, Glyma17G33190, Glyma05G25550, Glyma17G10420, Glyma15G02780, Glyma17G03300, Glyma18G07080, Glyma13G35790, Glyma19G39580, Glyma14G09510, Glyma06G15900, Glyma07G18500, Glyma11G13810, Glyma07G07110, Glyma04G24380, Glyma04G405920, Glyma17G16950, Glyma17G04120, Glyma15G13380, Glyma01G07970, Glyma06G21140, Glyma07G12010, Glyma14G40510, Glyma02G43200, Glyma09G39200, Glyma19G22790, Glyma20G06680, Glyma10G36750, Glyma20G23010, Glyma07G32590, Glyma15G10370, Glyma17G01500, Glyma04G41060, Glyma08G09050, Glyma08G46130, Glyma02G07740, Glyma19G30650, Glyma04G07370, Glyma07G38560, Glyma05G07540, Glyma08G41510, Glyma05G33830, Glyma05G26960, Glyma08G21340, Glyma07G32540, Glyma17G02150, Glyma15G23310, Glyma18G19670, Glyma05G27850, Glyma13G27840, Glyma09G21970, Glyma17G13910, Glyma17G12550, Glyma13G34290, Glyma12G34960, Glyma18G43390, Glyma20G39350, Glyma09G09390, Glyma17G17780, Glyma17G34410, Glyma15G20000, Glyma11G19120, Glyma07G07290, Glyma18G48520, Glyma16G21050, Glyma05G03320, Glyma11G37910, Glyma20G37930, Glyma09G34860, Glyma06G05770, Glyma13G17710, Glyma05G33270, Glyma08G10900, Glyma01G08600, Glyma18G52290, Glyma03G00440, Glyma04G08620, Glyma07G01250, Glyma11G04310, Glyma15G37670, Glyma03G30310, Glyma12G04200, Glyma14G05930, Glyma04G42830, Glyma09G08370, Glyma06G21910, Glyma07G11880, Glyma04G03120, Glyma14G40380, Glyma18G45440, Glyma04G16670, Glyma20G38380, Glyma06G20360, Glyma20G34060, Glyma20G29840, Glyma20G38610, Glyma10G28880, Glyma14G06970, Glyma10G23520, Glyma06G04140, Glyma20G34790, Glyma05G24050, Glyma01G42240, Glyma08G11940, Glyma18G06170, Glyma02G05210, Glyma10G29700, Glyma02G09080, Glyma06G17270, Glyma03G33590, Glyma16G33590, Glyma03G36310, Glyma14G07750, Glyma08G16680, Glyma05G08730, Glyma17G11760, Glyma08G20650, Glyma13G26680, Glyma06G44970, Glyma14G12880, Glyma16G04680, Glyma15G02980, Glyma12G30410, Glyma02G07690, Glyma13G33320, Glyma14G12420, Glyma16G29040, Glyma03G10390, Glyma05G24830, Glyma02G15150, Glyma03G32530, Glyma01G41150, Glyma16G29780, Glyma02G42420, Glyma04G36240, Glyma11G18350, Glyma19G37860, Glyma02G39190, Glyma20G29060, Glyma08G40810, Glyma13G41800, Glyma06G20200, Glyma08G24910, Glyma15G02430, Glyma06G12160, Glyma12G08200, Glyma09G28260, Glyma09G02930, Glyma20G39110, Glyma19G38970, Glyma17G34060, Glyma14G04890, Glyma07G01230, Glyma18G07130, Glyma02G07450, Glyma09G31250, Glyma09G38730, Glyma07G12060, Glyma03G29230, Glyma17G07280, Glyma20G19210, Glyma18G06570, Glyma01G36980, Glyma18G09380, Glyma01G01500, Glyma14G39930, Glyma14G03140, Glyma10G32800, Glyma12G01480, Glyma15G21010, Glyma07G09030, Glyma08G10880, Glyma12G02880, Glyma02G13630, Glyma04G06610, Glyma11G04350, Glyma06G12150, Glyma11G07760, Glyma06G18700, Glyma17G01310, Glyma06G47490, Glyma09G07100, Glyma06G14920, Glyma11G11500, Glyma04G43480, Glyma18G46930, Glyma13G35610, Glyma19G38110, Glyma04G30870, Glyma08G20140, Glyma13G10530, Glyma16G01090, Glyma05G01460, Glyma14G05300, Glyma15G29980, Glyma07G00350, Glyma15G42030, Glyma07G11320, Glyma08G12750, Glyma09G05710, Glyma01G01630, Glyma12G04410, Glyma19G07330, Glyma15G00670, Glyma18G08870, Glyma03G03360, Glyma11G11410, Glyma15G00340, Glyma20G16020, Glyma07G16020, Glyma12G33340, Glyma02G07770, Glyma15G02750, Glyma19G35270, Glyma17G11670, Glyma04G01110, Glyma10G30150, Glyma05G03440, Glyma16G10760, Glyma07G09530, Glyma19G00230, Glyma13G42680, Glyma02G43440, Glyma04G34140, Glyma11G32610, Glyma10G02020, Glyma20G36220, Glyma06G05910, Glyma17G05670, Glyma06G03160, Glyma08G27000, Glyma16G27030, Glyma08G05120, Glyma17G30980, Glyma13G38120, Glyma02G03320, Glyma15G14810, Glyma10G31160, Glyma17G14680, Glyma12G01450, Glyma03G32690, Glyma07G36500, Glyma19G34250, Glyma03G24720, Glyma04G39670, Glyma10G07870, Glyma02G05790, Glyma20G29700, Glyma01G45470, Glyma14G07700, Glyma09G06570, Glyma06G48250, Glyma10G35310, Glyma03G27470, Glyma05G31810, Glyma08G23150, Glyma07G02940, Glyma09G28920, Glyma05G27840, Glyma15G05350, Glyma09G08180, Glyma08G39340 |
|-----------|--------------------|----------|------------|----------|------------------------------------------------------------------------------------------------------------------------------------------------------------------------------------------------------------------------------------------------------------------------------------------------------------------------------------------------------------------------------------------------------------------------------------------------------------------------------------------------------------------------------------------------------------------------------------------------------------------------------------------------------------------------------------------------------------------------------------------------------------------------------------------------------------------------------------------------------------------------------------------------------------------------------------------------------------------------------------------------------------------------------------------------------------------------------------------------------------------------------------------------------------------------------------------------------------------------------------------------------------------------------------------------------------------------------------------------------------------------------------------------------------------------------------------------------------------------------------------------------------------------------------------------------------------------------------------------------------------------------------------------------------------------------------------------------------------------------------------------------------------------------------------------------------------------------------------------------------------------------------------------------------------------------------------------------------------------------------------------------------------------------------------------------------------------------------------------------------------------------------------------------------------------------------------------------------------------------------------------------------------------------------------------------------------------------------------------------------------------------------------------------------------------------------------------------------------------------------------------------------------------------------------------------------------------------------------------------------------------------------------------------------------------------------------------------------------------------------------------------------------------------------------------------------------------------------------------------------------------------------------------------------------------------------------------------------------------------------------------------------------------------------------------------------------------------------------------------------------------------------------------------------------------------------------------------------------------------------------------------------------------------------------------------------------------------------------------------------------------------------------------------------------------------------------------------------------------------------------------------------------------------------------------------------------------------------------------------------------------------------------------------------------------------------------------------------------------------------------------------------------------------------------------------------------------------------------------------------------------------------------------------------------------------------------------------------------------------------------------------------------------------------------------------------------------------------------------------------------------------------------------------------------------------------------------------------------------------------------------------------------------------------------------------------------------------------------------------------------------------------------------------------------------------------------------------------------------------------------------------------------------------------------------------------------------------------------------------------------------------------------------------------------------------------------------------------------------------------------------------------------------------------------------|

|           |                                 |         |           |          |                                                                                                                                                                                                                                                                                                                                                                                       |
|-----------|---------------------------------|---------|-----------|----------|---------------------------------------------------------------------------------------------------------------------------------------------------------------------------------------------------------------------------------------------------------------------------------------------------------------------------------------------------------------------------------------|
| GO:004888 | transmembrane receptor activity | 25/1695 | 197/27682 | 4.45E-04 | Glyma01G27440, Glyma02G03760, Glyma16G34030, Glyma16G03780, Glyma12G16450, Glyma04G01760, Glyma06G40740, Glyma20G06780, Glyma06G41880, Glyma06G40780, Glyma19G41210, Glyma03G38620, Glyma10G32800, Glyma16G10080, Glyma06G40980, Glyma13G38460, Glyma16G25010, Glyma09G29080, Glyma16G24940, Glyma16G06670, Glyma06G40690, Glyma16G33950, Glyma16G33590, Glyma06G41430, Glyma06G40710 |
|-----------|---------------------------------|---------|-----------|----------|---------------------------------------------------------------------------------------------------------------------------------------------------------------------------------------------------------------------------------------------------------------------------------------------------------------------------------------------------------------------------------------|

|           |                                     |              |                |              |                                                                                                                                                                                                                                                                                                                                                                                                                                                                                                                                                                                                                                                                                                                                                                                                                                                                                                                                                                                                                                                                                                                                                                                                                                                                                                                                                                                                                                                                                                                                                                                                                                                                                                                                                                                                                                                                                                                                                                                                                                                                                                                                                                                                                                                                                                                                                             |
|-----------|-------------------------------------|--------------|----------------|--------------|-------------------------------------------------------------------------------------------------------------------------------------------------------------------------------------------------------------------------------------------------------------------------------------------------------------------------------------------------------------------------------------------------------------------------------------------------------------------------------------------------------------------------------------------------------------------------------------------------------------------------------------------------------------------------------------------------------------------------------------------------------------------------------------------------------------------------------------------------------------------------------------------------------------------------------------------------------------------------------------------------------------------------------------------------------------------------------------------------------------------------------------------------------------------------------------------------------------------------------------------------------------------------------------------------------------------------------------------------------------------------------------------------------------------------------------------------------------------------------------------------------------------------------------------------------------------------------------------------------------------------------------------------------------------------------------------------------------------------------------------------------------------------------------------------------------------------------------------------------------------------------------------------------------------------------------------------------------------------------------------------------------------------------------------------------------------------------------------------------------------------------------------------------------------------------------------------------------------------------------------------------------------------------------------------------------------------------------------------------------|
| GO:004672 | protein kinase activity             | 162/169<br>5 | 2056/<br>27682 | 4.97E<br>-04 | Glyma04G04510,Glyma04G09210,Glyma18G44800,Glyma11G02150,Glyma18G50540,Glyma01G42770,Glyma13G43480,Glyma05G21420,Glyma14G36660,Glyma13G36600,Glyma02G06700,Glyma14G00380,Glyma01G03410,Glyma09G30430,Glyma14G10790,Glyma09G35140,Glyma16G32830,Glyma18G50510,Glyma13G18690,Glyma07G16260,Glyma08G44620,Glyma08G40920,Glyma16G08560,Glyma12G08900,Glyma20G27790,Glyma17G34190,Glyma09G05550,Glyma20G27800,Glyma09G37580,Glyma20G35970,Glyma09G03190,Glyma01G39380,Glyma17G01730,Glyma10G38810,Glyma18G45200,Glyma17G16070,Glyma02G46070,Glyma07G30260,Glyma13G23840,Glyma09G40150,Glyma08G06730,Glyma02G46670,Glyma14G05060,Glyma02G45800,Glyma08G06520,Glyma14G33400,Glyma02G11110,Glyma16G07060,Glyma13G21820,Glyma05G02470,Glyma18G38470,Glyma06G45590,Glyma19G41210,Glyma18G48600,Glyma05G33240,Glyma06G47870,Glyma18G47590,Glyma06G40110,Glyma07G01890,Glyma06G08880,Glyma13G02620,Glyma02G47230,Glyma18G50650,Glyma15G36110,Glyma20G30100,Glyma18G49060,Glyma14G03040,Glyma01G34780,Glyma18G47140,Glyma20G27720,Glyma13G42950,Glyma18G50450,Glyma18G50440,Glyma06G40920,Glyma05G23260,Glyma18G40680,Glyma10G07500,Glyma14G36960,Glyma11G34210,Glyma04G01440,Glyma17G04470,Glyma13G10040,Glyma15G17430,Glyma09G13540,Glyma06G02010,Glyma06G08480,Glyma03G38620,Glyma09G33120,Glyma09G19730,Glyma07G31140,Glyma03G00540,Glyma18G04440,Glyma11G09060,Glyma18G16060,Glyma13G16540,Glyma02G48100,Glyma12G34890,Glyma10G32990,Glyma06G40350,Glyma07G10460,Glyma14G29130,Glyma18G15150,Glyma08G39070,Glyma12G32880,Glyma06G40670,Glyma09G40650,Glyma15G04850,Glyma01G10100,Glyma16G32710,Glyma19G00650,Glyma18G42700,Glyma14G06570,Glyma03G02310,Glyma10G35610,Glyma15G02520,Glyma03G32160,Glyma13G23610,Glyma16G32640,Glyma12G17340,Glyma05G30030,Glyma13G40550,Glyma13G00370,Glyma13G06620,Glyma19G43290,Glyma03G37760,Glyma17G38210,Glyma20G27660,Glyma15G34810,Glyma07G09260,Glyma08G13040,Glyma16G32700,Glyma13G38950,Glyma08G13150,Glyma08G13060,Glyma17G33470,Glyma07G00670,Glyma17G34170,Glyma12G17450,Glyma12G17360,Glyma16G02290,Glyma14G12710,Glyma16G22370,Glyma13G06490,Glyma11G34490,Glyma02G14310,Glyma20G27510,Glyma16G27250,Glyma08G40030,Glyma05G30260,Glyma09G37650,Glyma14G38650,Glyma12G36440,Glyma15G04280,Glyma08G08000,Glyma02G40850,Glyma16G02340,Glyma07G00340,Glyma15G04350,Glyma19G04140,Glyma11G09070,Glyma04G43190,Glyma08G05720 |
| GO:006468 | protein amino acid phosphorylation  | 161/169<br>5 | 2046/<br>27682 | 5.48E<br>-04 | Glyma04G04510,Glyma04G09210,Glyma18G44800,Glyma11G02150,Glyma18G50540,Glyma01G42770,Glyma13G43480,Glyma05G21420,Glyma14G36660,Glyma13G36600,Glyma02G06700,Glyma14G00380,Glyma01G03410,Glyma09G30430,Glyma14G10790,Glyma09G35140,Glyma16G32830,Glyma18G50510,Glyma13G18690,Glyma07G16260,Glyma08G44620,Glyma08G40920,Glyma16G08560,Glyma12G08900,Glyma20G27790,Glyma17G34190,Glyma09G05550,Glyma20G27800,Glyma09G37580,Glyma20G35970,Glyma09G03190,Glyma01G39380,Glyma17G01730,Glyma10G38810,Glyma18G45200,Glyma17G16070,Glyma02G46070,Glyma07G30260,Glyma13G23840,Glyma09G40150,Glyma08G06730,Glyma02G46670,Glyma14G05060,Glyma02G45800,Glyma08G06520,Glyma14G33400,Glyma02G11110,Glyma16G07060,Glyma13G21820,Glyma05G02470,Glyma18G38470,Glyma06G45590,Glyma19G41210,Glyma18G48600,Glyma05G33240,Glyma06G47870,Glyma18G47590,Glyma06G40110,Glyma07G01890,Glyma06G08880,Glyma13G02620,Glyma02G47230,Glyma18G50650,Glyma15G36110,Glyma20G30100,Glyma18G49060,Glyma14G03040,Glyma01G34780,Glyma18G47140,Glyma20G27720,Glyma13G42950,Glyma18G50450,Glyma18G50440,Glyma06G40920,Glyma05G23260,Glyma18G40680,Glyma10G07500,Glyma14G36960,Glyma11G34210,Glyma04G01440,Glyma17G04470,Glyma13G10040,Glyma15G17430,Glyma09G13540,Glyma06G02010,Glyma06G08480,Glyma09G33120,Glyma09G19730,Glyma07G31140,Glyma03G00540,Glyma18G04440,Glyma11G09060,Glyma18G16060,Glyma13G16540,Glyma02G48100,Glyma12G34890,Glyma10G32990,Glyma06G40350,Glyma07G10460,Glyma14G29130,Glyma18G15150,Glyma08G39070,Glyma12G32880,Glyma06G40670,Glyma09G40650,Glyma15G04850,Glyma01G10100,Glyma16G32710,Glyma19G00650,Glyma18G42700,Glyma14G06570,Glyma03G02310,Glyma10G35610,Glyma15G02520,Glyma03G32160,Glyma13G23610,Glyma16G32640,Glyma12G17340,Glyma05G30030,Glyma13G40550,Glyma13G00370,Glyma13G06620,Glyma19G43290,Glyma03G37760,Glyma17G38210,Glyma20G27660,Glyma15G34810,Glyma07G09260,Glyma08G13040,Glyma16G32700,Glyma13G38950,Glyma08G13150,Glyma08G13060,Glyma17G33470,Glyma07G00670,Glyma17G34170,Glyma12G17450,Glyma12G17360,Glyma16G02290,Glyma14G12710,Glyma16G22370,Glyma13G06490,Glyma11G34490,Glyma02G14310,Glyma20G27510,Glyma16G27250,Glyma08G40030,Glyma05G30260,Glyma09G37650,Glyma14G38650,Glyma12G36440,Glyma15G04280,Glyma08G08000,Glyma02G40850,Glyma16G02340,Glyma07G00340,Glyma15G04350,Glyma19G04140,Glyma11G09070,Glyma04G43190,Glyma08G05720               |
| GO:015298 | solute:cation antiporter activity   | 12/1695      | 66/27682       | 6.01E<br>-04 | Glyma17G34780,Glyma10G30020,Glyma19G41890,Glyma19G42900,Glyma13G02910,Glyma03G40290,Glyma17G02560,Glyma06G47110,Glyma06G15970,Glyma03G39320,Glyma08G03320,Glyma03G32900                                                                                                                                                                                                                                                                                                                                                                                                                                                                                                                                                                                                                                                                                                                                                                                                                                                                                                                                                                                                                                                                                                                                                                                                                                                                                                                                                                                                                                                                                                                                                                                                                                                                                                                                                                                                                                                                                                                                                                                                                                                                                                                                                                                     |
| GO:015299 | solute:hydrogen antiporter activity | 12/1695      | 66/27682       | 6.01E<br>-04 | Glyma17G34780,Glyma10G30020,Glyma19G41890,Glyma19G42900,Glyma13G02910,Glyma03G40290,Glyma17G02560,Glyma06G47110,Glyma06G15970,Glyma03G39320,Glyma08G03320,Glyma03G32900                                                                                                                                                                                                                                                                                                                                                                                                                                                                                                                                                                                                                                                                                                                                                                                                                                                                                                                                                                                                                                                                                                                                                                                                                                                                                                                                                                                                                                                                                                                                                                                                                                                                                                                                                                                                                                                                                                                                                                                                                                                                                                                                                                                     |

|           |                                                        |          |            |          |                                                                                                                                                                                                                                                                                                                                                                                                                                                                                                                                                                                                                                                                                                                                                                                                                                                                                                                                                                                                                                                                                                                                                                                                                                                                                                                                                                                                                                                                                                                                                                                                                                                                                                                                                                                                                                                                                                                                                                                                                                                                                                                                                                                                                                                                                                                                          |
|-----------|--------------------------------------------------------|----------|------------|----------|------------------------------------------------------------------------------------------------------------------------------------------------------------------------------------------------------------------------------------------------------------------------------------------------------------------------------------------------------------------------------------------------------------------------------------------------------------------------------------------------------------------------------------------------------------------------------------------------------------------------------------------------------------------------------------------------------------------------------------------------------------------------------------------------------------------------------------------------------------------------------------------------------------------------------------------------------------------------------------------------------------------------------------------------------------------------------------------------------------------------------------------------------------------------------------------------------------------------------------------------------------------------------------------------------------------------------------------------------------------------------------------------------------------------------------------------------------------------------------------------------------------------------------------------------------------------------------------------------------------------------------------------------------------------------------------------------------------------------------------------------------------------------------------------------------------------------------------------------------------------------------------------------------------------------------------------------------------------------------------------------------------------------------------------------------------------------------------------------------------------------------------------------------------------------------------------------------------------------------------------------------------------------------------------------------------------------------------|
| GO:031224 | intrinsic to membrane                                  | 125/1695 | 1535/27682 | 6.52E-04 | Glyma10G30020, Glyma04G35730, Glyma10G41560, Glyma20G38960, Glyma11G07090, Glyma01G43190, Glyma17G08610, Glyma17G34780, Glyma12G06530, Glyma11G07050, Glyma12G16450, Glyma04G01760, Glyma15G15810, Glyma20G06780, Glyma06G15970, Glyma16G19340, Glyma01G36170, Glyma02G14440, Glyma06G20200, Glyma16G25010, Glyma09G34400, Glyma02G08970, Glyma09G29080, Glyma0028S00210, Glyma11G09770, Glyma06G40690, Glyma13G43670, Glyma01G31840, Glyma06G47110, Glyma11G16270, Glyma13G05770, Glyma13G37440, Glyma09G00300, Glyma11G37170, Glyma02G03760, Glyma16G34030, Glyma16G03780, Glyma17G10420, Glyma12G09680, Glyma19G05460, Glyma14G05020, Glyma02G47820, Glyma06G41880, Glyma06G40780, Glyma12G32920, Glyma05G21910, Glyma10G32800, Glyma07G04740, Glyma07G00840, Glyma12G32210, Glyma15G11650, Glyma06G21140, Glyma12G06920, Glyma16G27330, Glyma12G07120, Glyma10G29000, Glyma16G06730, Glyma16G24940, Glyma09G32510, Glyma08G03320, Glyma16G33950, Glyma15G05190, Glyma20G25660, Glyma08G46130, Glyma17G02560, Glyma11G14960, Glyma06G41430, Glyma06G40710, Glyma05G01460, Glyma06G47470, Glyma18G01530, Glyma11G25250, Glyma06G40740, Glyma13G02910, Glyma16G25540, Glyma09G05710, Glyma16G32650, Glyma16G10080, Glyma15G00670, Glyma05G35710, Glyma10G44190, Glyma06G40980, Glyma13G38460, Glyma18G08870, Glyma03G00280, Glyma20G16020, Glyma12G33340, Glyma02G12320, Glyma19G41890, Glyma08G10900, Glyma04G33950, Glyma03G40290, Glyma02G39150, Glyma16G10760, Glyma15G01270, Glyma03G22960, Glyma02G48150, Glyma03G05440, Glyma01G27440, Glyma13G43950, Glyma13G44520, Glyma05G08880, Glyma18G08030, Glyma03G39320, Glyma10G31520, Glyma05G26750, Glyma19G42900, Glyma19G37360, Glyma15G25180, Glyma20G38380, Glyma08G45020, Glyma08G40980, Glyma20G04160, Glyma01G22650, Glyma12G36250, Glyma15G08530, Glyma10G29700, Glyma08G23150, Glyma01G22990, Glyma15G10630, Glyma13G07400, Glyma16G33590, Glyma07G02940, Glyma03G32900, Glyma05G38020                                                                                                                                                                                                                                                                                                                                                                                      |
| GO:004872 | receptor activity                                      | 25/1695  | 203/27682  | 6.96E-04 | Glyma01G27440, Glyma02G03760, Glyma16G34030, Glyma16G03780, Glyma12G16450, Glyma04G01760, Glyma06G40740, Glyma20G06780, Glyma06G41880, Glyma06G40780, Glyma19G41210, Glyma03G38620, Glyma10G32800, Glyma16G10080, Glyma06G40980, Glyma13G38460, Glyma16G25010, Glyma09G29080, Glyma16G24940, Glyma16G06670, Glyma06G40690, Glyma16G33950, Glyma16G33590, Glyma06G41430, Glyma06G40710                                                                                                                                                                                                                                                                                                                                                                                                                                                                                                                                                                                                                                                                                                                                                                                                                                                                                                                                                                                                                                                                                                                                                                                                                                                                                                                                                                                                                                                                                                                                                                                                                                                                                                                                                                                                                                                                                                                                                    |
| GO:004650 | polygalacturonase activity                             | 13/1695  | 77/27682   | 7.55E-04 | Glyma15G23310, Glyma04G30870, Glyma06G15940, Glyma18G19670, Glyma09G39200, Glyma17G03300, Glyma07G07290, Glyma16G29780, Glyma14G04850, Glyma05G08730, Glyma12G01480, Glyma19G00230, Glyma08G39340                                                                                                                                                                                                                                                                                                                                                                                                                                                                                                                                                                                                                                                                                                                                                                                                                                                                                                                                                                                                                                                                                                                                                                                                                                                                                                                                                                                                                                                                                                                                                                                                                                                                                                                                                                                                                                                                                                                                                                                                                                                                                                                                        |
| GO:004674 | protein serine/threonine kinase activity               | 150/1695 | 1901/27682 | 7.55E-04 | Glyma04G04510, Glyma04G09210, Glyma18G44800, Glyma11G02150, Glyma18G50540, Glyma01G42770, Glyma13G43480, Glyma05G21420, Glyma14G36660, Glyma13G36600, Glyma02G06700, Glyma01G03410, Glyma09G30430, Glyma14G10790, Glyma09G35140, Glyma13G18690, Glyma18G50510, Glyma07G16260, Glyma08G44620, Glyma16G08560, Glyma12G08900, Glyma20G27790, Glyma17G34190, Glyma09G05550, Glyma20G27800, Glyma09G37580, Glyma20G35970, Glyma09G03190, Glyma01G39380, Glyma17G01730, Glyma10G38810, Glyma18G45200, Glyma17G16070, Glyma02G46070, Glyma07G30260, Glyma13G23840, Glyma09G40150, Glyma08G06730, Glyma02G46670, Glyma14G05060, Glyma02G45800, Glyma08G06520, Glyma14G33400, Glyma02G11110, Glyma16G07060, Glyma13G21820, Glyma05G02470, Glyma18G38470, Glyma06G45590, Glyma18G48600, Glyma05G33240, Glyma06G47870, Glyma18G47590, Glyma06G40110, Glyma06G08880, Glyma07G01890, Glyma13G02620, Glyma02G47230, Glyma18G50650, Glyma15G36110, Glyma20G30100, Glyma18G49060, Glyma14G03040, Glyma01G34780, Glyma18G47140, Glyma20G27720, Glyma13G42950, Glyma18G50450, Glyma18G50440, Glyma06G40920, Glyma18G40680, Glyma10G07500, Glyma14G36960, Glyma11G34210, Glyma04G01440, Glyma13G10040, Glyma15G17430, Glyma09G13540, Glyma06G02010, Glyma06G08480, Glyma09G33120, Glyma09G19730, Glyma07G31140, Glyma03G00540, Glyma18G04440, Glyma11G09060, Glyma18G16060, Glyma13G16540, Glyma02G48100, Glyma12G34890, Glyma10G32990, Glyma06G40350, Glyma07G10460, Glyma14G29130, Glyma18G15150, Glyma08G39070, Glyma12G32880, Glyma06G40670, Glyma09G40650, Glyma15G04850, Glyma01G10100, Glyma16G32710, Glyma19G00650, Glyma18G42700, Glyma14G06570, Glyma03G02310, Glyma15G02520, Glyma03G32160, Glyma13G23610, Glyma16G32640, Glyma12G17340, Glyma05G30030, Glyma13G40550, Glyma13G00370, Glyma13G06620, Glyma17G38210, Glyma19G43290, Glyma20G27660, Glyma15G34810, Glyma07G09260, Glyma08G13040, Glyma13G38950, Glyma08G13060, Glyma17G33470, Glyma07G00670, Glyma17G34170, Glyma12G17450, Glyma12G17360, Glyma16G02290, Glyma14G12710, Glyma16G22370, Glyma02G14310, Glyma13G06490, Glyma20G27510, Glyma08G40030, Glyma16G27250, Glyma05G30260, Glyma09G37650, Glyma14G38650, Glyma12G36440, Glyma15G04280, Glyma02G40850, Glyma08G08000, Glyma16G02340, Glyma07G00340, Glyma15G04350, Glyma19G04140, Glyma11G09070, Glyma04G43190, Glyma08G05720 |
| GO:008839 | dihydrodipicolinate reductase activity                 | 3/1695   | 4/27682    | 8.75E-04 | Glyma20G29480, Glyma07G06610, Glyma10G38370                                                                                                                                                                                                                                                                                                                                                                                                                                                                                                                                                                                                                                                                                                                                                                                                                                                                                                                                                                                                                                                                                                                                                                                                                                                                                                                                                                                                                                                                                                                                                                                                                                                                                                                                                                                                                                                                                                                                                                                                                                                                                                                                                                                                                                                                                              |
| GO:016773 | phosphotransferase activity, alcohol group as acceptor | 178/1695 | 2318/27682 | 8.86E-04 | Glyma04G04510, Glyma04G09210, Glyma18G44800, Glyma11G02150, Glyma18G50540, Glyma01G42770, Glyma05G21420, Glyma13G43480, Glyma17G09700, Glyma14G36660, Glyma13G36600, Glyma19G39680, Glyma02G06700, Glyma14G00380, Glyma01G03410, Glyma09G30430, Glyma14G10790, Glyma09G35140, Glyma16G32830, Glyma18G50510, Glyma13G18690, Glyma07G16260, Glyma08G44620, Glyma08G40920, Glyma16G08560, Glyma12G08900, Glyma20G27790, Glyma09G05550, Glyma17G34190, Glyma20G27800, Glyma09G37580, Glyma04G09340, Glyma20G35970, Glyma09G03190, Glyma01G39380, Glyma17G01730, Glyma10G38810, Glyma18G45200, Glyma17G16070, Glyma02G46070, Glyma07G30260, Glyma13G23840, Glyma09G40150, Glyma08G06730, Glyma02G46670, Glyma06G09490, Glyma09G23150, Glyma14G05060, Glyma02G45800, Glyma08G03240, Glyma08G06520, Glyma14G33400, Glyma02G11110, Glyma16G07060, Glyma13G21820, Glyma05G02470, Glyma18G38470, Glyma06G45590, Glyma19G41210, Glyma18G48600, Glyma05G33240, Glyma06G47870, Glyma08G06330, Glyma18G47590, Glyma13G21030, Glyma06G40110, Glyma07G01890, Glyma06G08880, Glyma19G44690, Glyma02G47230, Glyma13G02620, Glyma18G50650, Glyma09G30070, Glyma15G36110, Glyma20G30100, Glyma18G49060, Glyma14G03040, Glyma01G34780, Glyma18G47140, Glyma20G27720, Glyma13G05640, Glyma13G42950, Glyma18G50450, Glyma18G50440, Glyma06G40920, Glyma05G23260, Glyma18G40680, Glyma10G07500, Glyma14G36960, Glyma11G34210, Glyma04G01440, Glyma13G10040, Glyma17G04470, Glyma15G17430, Glyma09G13540, Glyma06G02010, Glyma09G26710, Glyma08G19860, Glyma06G08480, Glyma03G38620, Glyma09G33120, Glyma09G19730, Glyma07G31140, Glyma03G00540, Glyma                                                                                                                                                                                                                                                                                                                                                                                                                                                                                                                                                                                                                                                                                                            |

18G04440,Glyma11G09060,Glyma18G16060,Glyma13G16540,Glyma07G12130,Glyma02G48100,Glyma12G34890,Glyma10G32990,Glyma06G40350,Glyma07G10460,Glyma14G29130,Glyma18G15150,Glyma08G39070,Glyma12G32880,Glyma06G40670,Glyma09G40650,Glyma15G04850,Glyma01G10100,Glyma16G32710,Glyma19G00650,Glyma18G42700,Glyma14G06570,Glyma03G02310,Glyma10G35610,Glyma15G02520,Glyma03G32160,Glyma13G23610,Glyma16G32640,Glyma12G17340,Glyma05G30030,Glyma13G40550,Glyma13G00370,Glyma13G06620,Glyma19G43290,Glyma03G37760,Glyma17G38210,Glyma20G27660,Glyma15G34810,Glyma07G09260,Glyma08G13040,Glyma16G32700,Glyma13G38950,Glyma08G13150,Glyma08G13060,Glyma17G33470,Glyma07G00670,Glyma17G34170,Glyma12G17450,Glyma12G17360,Glyma16G02290,Glyma14G12710,Glyma03G42000,Glyma10G34490,Glyma16G22370,Glyma13G06490,Glyma11G34490,Glyma02G14310,Glyma20G27510,Glyma16G27250,Glyma08G40030,Glyma05G30260,Glyma09G37650,Glyma14G38650,Glyma12G36440,Glyma15G04280,Glyma08G08000,Glyma02G40850,Glyma16G02340,Glyma07G00340,Glyma15G04350,Glyma19G04140,Glyma11G09070,Glyma04G43190,Glyma08G05720

Glyma04G04510,Glyma04G09210,Glyma18G44800,Glyma11G02150,Glyma18G50540,Glyma01G42770,Glyma13G43480,Glyma05G21420,Glyma14G36660,Glyma13G36600,Glyma02G06700,Glyma14G00380,Glyma01G03410,Glyma18G50540,Glyma01G42770,Glyma13G43480,Glyma05G21420,Glyma14G36660,Glyma13G36600,Glyma02G06700,Glyma14G00380,Glyma01G03410,Glyma18G50510,Glyma13G18690,Glyma07G16260,Glyma08G44620,Glyma08G40920,Glyma16G08560,Glyma12G08900,Glyma20G27790,Glyma17G34190,Glyma09G05550,Glyma20G27800,Glyma09G37580,Glyma20G35970,Glyma09G03190,Glyma01G39380,Glyma17G01730,Glyma10G38810,Glyma18G45200,Glyma17G16070,Glyma02G46070,Glyma07G30260,Glyma13G23840,Glyma09G40150,Glyma08G06730,Glyma02G46670,Glyma14G05060,Glyma02G45800,Glyma08G03240,Glyma08G06520,Glyma14G33400,Glyma04G01440,Glyma13G10040,Glyma17G04470,Glyma15G17430,Glyma09G13540,Glyma06G02010,Glyma06G45590,Glyma19G41210,Glyma18G48600,Glyma05G33240,Glyma06G47870,Glyma18G47590,Glyma06G40110,Glyma07G01890,Glyma06G08880,Glyma19G44690,Glyma02G47230,Glyma13G02620,Glyma18G50650,Glyma15G36110,Glyma20G30100,Glyma18G49060,Glyma14G03040,Glyma01G34780,Glyma18G47140,Glyma20G27720,Glyma13G42950,Glyma18G50450,Glyma18G50440,Glyma06G40920,Glyma05G23260,Glyma18G40680,Glyma10G07500,Glyma14G36960,Glyma11G34210,Glyma04G01440,Glyma13G10040,Glyma17G04470,Glyma15G17430,Glyma09G13540,Glyma06G02010,Glyma06G08480,Glyma09G33120,Glyma09G19730,Glyma07G31140,Glyma03G00540,Glyma18G04440,Glyma11G09060,Glyma18G16060,Glyma13G16540,Glyma02G48100,Glyma12G34890,Glyma10G32990,Glyma06G40350,Glyma07G10460,Glyma14G29130,Glyma18G15150,Glyma08G39070,Glyma12G32880,Glyma06G40670,Glyma09G40650,Glyma15G04850,Glyma01G10100,Glyma16G32710,Glyma19G00650,Glyma18G42700,Glyma14G06570,Glyma03G02310,Glyma10G35610,Glyma15G02520,Glyma03G32160,Glyma13G23610,Glyma16G32640,Glyma12G17340,Glyma05G30030,Glyma13G40550,Glyma13G00370,Glyma13G06620,Glyma19G43290,Glyma03G37760,Glyma17G38210,Glyma20G27660,Glyma15G34810,Glyma07G09260,Glyma08G13040,Glyma16G32700,Glyma13G38950,Glyma08G13150,Glyma08G13060,Glyma17G33470,Glyma07G00670,Glyma17G34170,Glyma12G17450,Glyma12G17360,Glyma16G02290,Glyma14G12710,Glyma03G42000,Glyma16G22370,Glyma13G06490,Glyma11G34490,Glyma02G14310,Glyma20G27510,Glyma16G27250,Glyma08G40030,Glyma05G30260,Glyma09G37650,Glyma14G38650,Glyma12G36440,Glyma15G04280,Glyma08G08000,Glyma02G40850,Glyma16G02340,Glyma07G00340,Glyma15G04350,Glyma19G04140,Glyma11G09070,Glyma04G43190,Glyma08G05720

GO:016310 phosphorylation 164/169 2120/27682 1.03E-03

Glyma04G04510,Glyma04G09210,Glyma18G44800,Glyma11G02150,Glyma18G50540,Glyma01G42770,Glyma05G21420,Glyma13G43480,Glyma17G09700,Glyma14G36660,Glyma13G36600,Glyma05G32340,Glyma19G39680,Glyma02G06700,Glyma14G00380,Glyma01G03410,Glyma09G30430,Glyma14G10790,Glyma09G35140,Glyma16G32830,Glyma18G50510,Glyma13G18690,Glyma07G16260,Glyma08G44620,Glyma08G40920,Glyma16G08560,Glyma12G08900,Glyma20G27790,Glyma09G05550,Glyma17G34190,Glyma20G27800,Glyma09G37580,Glyma20G35970,Glyma09G03190,Glyma08G15610,Glyma01G39380,Glyma17G01730,Glyma10G38810,Glyma18G45200,Glyma17G16070,Glyma02G46070,Glyma07G30260,Glyma13G23840,Glyma09G40150,Glyma08G06730,Glyma02G46670,Glyma09G23150,Glyma14G05060,Glyma02G45800,Glyma08G03240,Glyma08G06520,Glyma14G33400,Glyma02G11110,Glyma16G07060,Glyma13G21820,Glyma05G02470,Glyma18G38470,Glyma06G45590,Glyma19G41210,Glyma18G48600,Glyma05G33240,Glyma06G47870,Glyma08G06330,Glyma18G47590,Glyma07G04560,Glyma13G21030,Glyma06G40110,Glyma07G01890,Glyma06G08880,Glyma02G47230,Glyma19G44690,Glyma13G02620,Glyma18G50650,Glyma09G30070,Glyma15G36110,Glyma20G30100,Glyma18G49060,Glyma14G03040,Glyma01G34780,Glyma18G47140,Glyma20G27720,Glyma13G05640,Glyma13G42950,Glyma18G50450,Glyma18G50440,Glyma06G40920,Glyma05G23260,Glyma18G40680,Glyma10G07500,Glyma14G36960,Glyma11G34210,Glyma04G01440,Glyma13G10040,Glyma17G04470,Glyma15G17430,Glyma09G13540,Glyma06G02010,Glyma08G19860,Glyma08G19860,Glyma06G08480,Glyma03G38620,Glyma09G33120,Glyma09G19730,Glyma07G31140,Glyma03G00540,Glyma18G04440,Glyma11G09060,Glyma18G16060,Glyma13G16540,Glyma07G12130,Glyma02G48100,Glyma12G34890,Glyma10G32990,Glyma06G40350,Glyma07G10460,Glyma14G29130,Glyma18G15150,Glyma08G39070,Glyma11G05140,Glyma12G32880,Glyma06G40670,Glyma09G40650,Glyma15G04850,Glyma01G10100,Glyma16G32710,Glyma19G00650,Glyma18G42700,Glyma14G06570,Glyma03G02310,Glyma10G35610,Glyma15G02520,Glyma03G32160,Glyma13G23610,Glyma16G32640,Glyma12G17340,Glyma05G30030,Glyma13G40550,Glyma13G00370,Glyma13G06620,Glyma19G43290,Glyma03G37760,Glyma17G38210,Glyma20G27660,Glyma15G34810,Glyma07G09260,Glyma08G13040,Glyma16G32700,Glyma13G38950,Glyma08G13150,Glyma08G13060,Glyma17G33470,Glyma07G00670,Glyma17G34170,Glyma12G17450,Glyma12G17360,Glyma16G02290,Glyma14G12710,Glyma03G42000,Glyma16G22370,Glyma13G06490,Glyma11G34490,Glyma02G14310,Glyma20G27510,Glyma16G27250,Glyma08G40030,Glyma05G30260,Glyma09G37650,Glyma14G38650,Glyma12G36440,Glyma15G04280,Glyma08G08000,Glyma02G40850,Glyma16G02340,Glyma07G00340,Glyma15G04350,Glyma19G04140,Glyma11G09070,Glyma04G43190,Glyma08G05720

GO:016301 kinase activity 179/169 2347/27682 1.17E-03

|           |                                                |          |            |          |                                                                                                                                                                                                                                                                                                                                                                                                                                                                                                                                                                                                                                                                                                                                                                                                                                                                                                                                                                                                                                                                                                                                                                                                                                                                                                                                                                                                                                                                                                                                                                                                                                                                                                                                                                                                                                                                                                                                                                                                                                                                                                                                                                                                                                                                                                                                                                                                                                                                                                                                                                                                                                                                                                                                                                                                                                                                                                                                                                                                                                                                                                                                                                                                                                                                                                                                                                                                                                                                                                                                                                                                                                                                                                                                                                                                                                                                                                                                                                                                                                                                                                                                                                                                                                                                                                                                                                                                                                                                                                                                                                                                                                                                                                                                                                                                                                                                                                                                                                                                                                                                                                                                                                                                                                                                                                                                                                                                                                                                                                                                                                                                                                                                                                                                                                                                                                                                                                                                                                 |
|-----------|------------------------------------------------|----------|------------|----------|-----------------------------------------------------------------------------------------------------------------------------------------------------------------------------------------------------------------------------------------------------------------------------------------------------------------------------------------------------------------------------------------------------------------------------------------------------------------------------------------------------------------------------------------------------------------------------------------------------------------------------------------------------------------------------------------------------------------------------------------------------------------------------------------------------------------------------------------------------------------------------------------------------------------------------------------------------------------------------------------------------------------------------------------------------------------------------------------------------------------------------------------------------------------------------------------------------------------------------------------------------------------------------------------------------------------------------------------------------------------------------------------------------------------------------------------------------------------------------------------------------------------------------------------------------------------------------------------------------------------------------------------------------------------------------------------------------------------------------------------------------------------------------------------------------------------------------------------------------------------------------------------------------------------------------------------------------------------------------------------------------------------------------------------------------------------------------------------------------------------------------------------------------------------------------------------------------------------------------------------------------------------------------------------------------------------------------------------------------------------------------------------------------------------------------------------------------------------------------------------------------------------------------------------------------------------------------------------------------------------------------------------------------------------------------------------------------------------------------------------------------------------------------------------------------------------------------------------------------------------------------------------------------------------------------------------------------------------------------------------------------------------------------------------------------------------------------------------------------------------------------------------------------------------------------------------------------------------------------------------------------------------------------------------------------------------------------------------------------------------------------------------------------------------------------------------------------------------------------------------------------------------------------------------------------------------------------------------------------------------------------------------------------------------------------------------------------------------------------------------------------------------------------------------------------------------------------------------------------------------------------------------------------------------------------------------------------------------------------------------------------------------------------------------------------------------------------------------------------------------------------------------------------------------------------------------------------------------------------------------------------------------------------------------------------------------------------------------------------------------------------------------------------------------------------------------------------------------------------------------------------------------------------------------------------------------------------------------------------------------------------------------------------------------------------------------------------------------------------------------------------------------------------------------------------------------------------------------------------------------------------------------------------------------------------------------------------------------------------------------------------------------------------------------------------------------------------------------------------------------------------------------------------------------------------------------------------------------------------------------------------------------------------------------------------------------------------------------------------------------------------------------------------------------------------------------------------------------------------------------------------------------------------------------------------------------------------------------------------------------------------------------------------------------------------------------------------------------------------------------------------------------------------------------------------------------------------------------------------------------------------------------------------------------------------------------------------------------|
| GO:043170 | macromolecule metabolic process                | 409/1695 | 5862/27682 | 1.34E-03 | Glyma13G41790,Glyma14G35680,Glyma04G04510,Glyma16G09890,Glyma04G37770,Glyma17G04800,Glyma06G08730,Glyma13G26260,Glyma12G08900,Glyma0028S00210,Glyma09G00810,Glyma17G08540,Glyma15G09700,Glyma17G01730,Glyma08G26940,Glyma08G22520,Glyma13G23840,Glyma10G36220,Glyma18G49880,Glyma06G42640,Glyma17G33190,Glyma05G25550,Glyma14G33400,Glyma13G21820,Glyma18G32680,Glyma12G05460.3,Glyma06G45590,Glyma18G48600,Glyma07G18500,Glyma05G33240,Glyma14G33700,Glyma02G00490,Glyma02G47230,Glyma02G43200,Glyma04G41630,Glyma02G12030,Glyma15G36110,Glyma07G06620,Glyma20G23010,Glyma18G03120,Glyma17G09690,Glyma11G34170,Glyma08G10910,Glyma19G30650,Glyma18G50450,Glyma14G09950,Glyma05G26960,Glyma18G40680,Glyma20G31530,Glyma13G27840,Glyma09G09390,Glyma05G30650,Glyma16G17760,Glyma17G17780,Glyma03G26080,Glyma18G48520,Glyma17G09940,Glyma06G17550,Glyma06G08480,Glyma11G09060,Glyma09G34860,Glyma10G28890,Glyma01G10100,Glyma01G08600,Glyma14G06570,Glyma06G06380.2,Glyma15G02520,Glyma03G00420,Glyma11G04310,Glyma04G39120,Glyma11G04020,Glyma16G32640,Glyma12G17340,Glyma13G40550,Glyma04G42830,Glyma07G09260,Glyma06G21910,Glyma13G38950,Glyma08G13150,Glyma04G36150,Glyma11G13460,Glyma17G33470,Glyma07G00670,Glyma14G06970,Glyma16G02290,Glyma14G12710,Glyma17G10710,Glyma16G22370,Glyma10G29700,Glyma02G09080,Glyma08G40030,Glyma05G03640,Glyma07G31350,Glyma02G40850,Glyma16G02340,Glyma17G11760,Glyma10G38450.2,Glyma11G09070,Glyma04G43190,Glyma06G11940,Glyma13G26680,Glyma19G41050,Glyma14G12880,Glyma18G44800,Glyma19G27420,Glyma12G30410,Glyma01G42770,Glyma05G21420,Glyma16G05410,Glyma14G00380,Glyma11G15530,Glyma18G14560,Glyma08G40920,Glyma06G12160,Glyma09G05550,Glyma12G08200,Glyma09G28260,Glyma18G48350,Glyma11G02190,Glyma09G37580,Glyma12G03140,Glyma01G39380,Glyma10G38810,Glyma06G30860,Glyma02G46070,Glyma07G30260,Glyma08G06730,Glyma02G46670,Glyma14G05060,Glyma08G06520,Glyma16G07060,Glyma01G37090,Glyma14G22170,Glyma03G37490,Glyma18G09380,Glyma04G27730,Glyma15G21010,Glyma02G36720,Glyma18G47590,Glyma06G08880,Glyma06G40110,Glyma15G37240,Glyma13G02620,Glyma02G13630,Glyma18G50650,Glyma10G08040,Glyma08G18760,Glyma05G30230,Glyma14G03040,Glyma01G34780,Glyma09G02180,Glyma20G27720,Glyma18G50440,Glyma17G11130,Glyma14G36960,Glyma03G24260,Glyma13G25110,Glyma17G04470,Glyma15G29980,Glyma13G10040,Glyma15G17430,Glyma13G02420,Glyma10G04530,Glyma11G35100,Glyma08G0338620,Glyma12G36820,Glyma18G04440,Glyma19G29170,Glyma15G00950,Glyma04G40150,Glyma13G10200,Glyma06G40670,Glyma09G40650,Glyma15G04850,Glyma16G32710,Glyma10G35610,Glyma19G30630,Glyma05G28150,Glyma04G00580,Glyma14G03380,Glyma20G36220,Glyma13G33560,Glyma15G06040,Glyma05G30030,Glyma08G27000,Glyma13G00370,Glyma19G43290,Glyma13G38120,Glyma07G36500.4,Glyma12G17360,Glyma03G24720,Glyma03G36090,Glyma10G12530,Glyma10G07870,Glyma17G10370,Glyma02G14310,Glyma11G34490,Glyma13G06490,Glyma11G31410,Glyma20G27510,Glyma09G06570,Glyma09G37650,Glyma12G36440,Glyma18G11010,Glyma10G29200,Glyma08G08000,Glyma15G05350,Glyma09G08180,Glyma11G02560,Glyma14G03310,Glyma04G09210,Glyma14G36660,Glyma13G36600,Glyma02G43080,Glyma12G06530,Glyma15G08040,Glyma01G03410,Glyma09G30430,Glyma19G34580,Glyma07G33200,Glyma13G18690,Glyma18G50510,Glyma16G08560,Glyma17G34190,Glyma18G01960,Glyma14G40460,Glyma09G03190,Glyma08G42790,Glyma06G04540,Glyma11G20180,Glyma09G00300,Glyma11G37170,Glyma12G20860,Glyma02G45800,Glyma02G11110,Glyma07G32200,Glyma05G26040,Glyma19G41210,Glyma04G24380,Glyma17G04120,Glyma17G16950,Glyma07G01890,Glyma0048S00320,Glyma17G01500,Glyma20G34690,Glyma05G32070,Glyma12G37040,Glyma09G24410,Glyma05G07540,Glyma13G18510,Glyma06G42800,Glyma14G05050,Glyma10G07500,Glyma15G23150,Glyma18G43390,Glyma11G34210,Glyma04G01440,Glyma09G33120,Glyma09G19730,Glyma18G16060,Glyma13G16540,Glyma09G28040,Glyma10G35220,Glyma20G33570,Glyma13G17710,Glyma08G16150,Glyma18G15150,Glyma05G33270,Glyma12G32880,Glyma08G10900,Glyma08G39070,Glyma07G31630,Glyma03G02310,Glyma04G08620,Glyma12G09220,Glyma20G23080,Glyma17G38210,Glyma13G06620,Glyma15G34810,Glyma08G13040,Glyma16G32700,Glyma18G11110,Glyma01G01750,Glyma20G34060,Glyma10G23520,Glyma18G06170,Glyma12G30780,Glyma16G27250,Glyma17G02080,Glyma11G10100,Glyma05G00310,Glyma14G07750,Glyma07G00340,Glyma11G02150,Glyma10G06500,Glyma02G09370,Glyma18G50540,Glyma13G43480,Glyma13G33320,Glyma14G12420,Glyma16G25600,Glyma02G06700,Glyma10G41990,Glyma03G31820,Glyma01G41150,Glyma17G08000,Glyma07G00440,Glyma14G10790,Glyma09G29980,Glyma16G00480,Glyma09G35140,Glyma16G32830,Glyma07G16260,Glyma08G44620,Glyma20G27790,Glyma09G00280,Glyma14G01440,Glyma20G39110,Glyma09G02930,Glyma20G27800,Glyma14G04890,Glyma20G38860,Glyma20G35970,Glyma0220S00210,Glyma18G45200,Glyma18G53590,Glyma17G16070,Glyma01G00960,Glyma09G40150,Glyma06G07380,Glyma18G08220,Glyma02G02580,Glyma18G14770,Glyma09G03660,Glyma07G39300,Glyma17G07280,Glyma09G00580,Glyma05G02470,Glyma18G38470,Glyma14G03140,Glyma15G42640,Glyma06G47870,Glyma11G19880,Glyma15G14550,Glyma08G10880,Glyma12G02880,Glyma04G06610,Glyma05G36200,Glyma19G43270,Glyma20G30100,Glyma18G49060,Glyma02G44040,Glyma08G18860,Glyma18G47140,Glyma19G37820,Glyma13G42950,Glyma06G40920,Glyma05G23260,Glyma07G39980,Glyma06G11820,Glyma16G01090,Glyma05G01510,Glyma09G13540,Glyma06G02010,Glyma07G11320,Glyma07G31140,Glyma17G09120,Glyma03G00540,Glyma12G36570,Glyma18G04130,Glyma17G01570,Glyma02G48100,Glyma11G11410,Glyma12G34890,Glyma10G32990,Glyma06G40350,Glyma08G15360,Glyma14G29130,Glyma07G10460,Glyma05G03440,Glyma12G31840,Glyma19G00650,Glyma06G21440,Glyma18G42700,Glyma11G32610,Glyma13G23610,Glyma03G32160,Glyma17G05670,Glyma10G12350,Glyma10G34020,Glyma03G37760,Glyma20G27660,Glyma02G03320,Glyma08G13060,Glyma17G34170,Glyma17G14680,Glyma12G17450,Glyma08G09540,Glyma06G15860,Glyma05G03930,Glyma06G38190,Glyma05G30260,Glyma14G38650,Glyma15G04280,Glyma15G04350,Glyma19G04140,Glyma08G05720,Glyma17G07940 |
| GO:006885 | regulation of pH                               | 4/1695   | 9/27682    | 1.38E-03 | Glyma10G30020,Glyma19G42900,Glyma03G40290,Glyma17G02560                                                                                                                                                                                                                                                                                                                                                                                                                                                                                                                                                                                                                                                                                                                                                                                                                                                                                                                                                                                                                                                                                                                                                                                                                                                                                                                                                                                                                                                                                                                                                                                                                                                                                                                                                                                                                                                                                                                                                                                                                                                                                                                                                                                                                                                                                                                                                                                                                                                                                                                                                                                                                                                                                                                                                                                                                                                                                                                                                                                                                                                                                                                                                                                                                                                                                                                                                                                                                                                                                                                                                                                                                                                                                                                                                                                                                                                                                                                                                                                                                                                                                                                                                                                                                                                                                                                                                                                                                                                                                                                                                                                                                                                                                                                                                                                                                                                                                                                                                                                                                                                                                                                                                                                                                                                                                                                                                                                                                                                                                                                                                                                                                                                                                                                                                                                                                                                                                                         |
| GO:055067 | monovalent inorganic cation homeostasis        | 4/1695   | 9/27682    | 1.38E-03 | Glyma10G30020,Glyma19G42900,Glyma03G40290,Glyma17G02560                                                                                                                                                                                                                                                                                                                                                                                                                                                                                                                                                                                                                                                                                                                                                                                                                                                                                                                                                                                                                                                                                                                                                                                                                                                                                                                                                                                                                                                                                                                                                                                                                                                                                                                                                                                                                                                                                                                                                                                                                                                                                                                                                                                                                                                                                                                                                                                                                                                                                                                                                                                                                                                                                                                                                                                                                                                                                                                                                                                                                                                                                                                                                                                                                                                                                                                                                                                                                                                                                                                                                                                                                                                                                                                                                                                                                                                                                                                                                                                                                                                                                                                                                                                                                                                                                                                                                                                                                                                                                                                                                                                                                                                                                                                                                                                                                                                                                                                                                                                                                                                                                                                                                                                                                                                                                                                                                                                                                                                                                                                                                                                                                                                                                                                                                                                                                                                                                                         |
| GO:005451 | monovalent cation:hydrogen antiporter activity | 4/1695   | 9/27682    | 1.38E-03 | Glyma10G30020,Glyma19G42900,Glyma03G40290,Glyma17G02560                                                                                                                                                                                                                                                                                                                                                                                                                                                                                                                                                                                                                                                                                                                                                                                                                                                                                                                                                                                                                                                                                                                                                                                                                                                                                                                                                                                                                                                                                                                                                                                                                                                                                                                                                                                                                                                                                                                                                                                                                                                                                                                                                                                                                                                                                                                                                                                                                                                                                                                                                                                                                                                                                                                                                                                                                                                                                                                                                                                                                                                                                                                                                                                                                                                                                                                                                                                                                                                                                                                                                                                                                                                                                                                                                                                                                                                                                                                                                                                                                                                                                                                                                                                                                                                                                                                                                                                                                                                                                                                                                                                                                                                                                                                                                                                                                                                                                                                                                                                                                                                                                                                                                                                                                                                                                                                                                                                                                                                                                                                                                                                                                                                                                                                                                                                                                                                                                                         |

|           |                                            |              |                |              |                                                                                                                                                                                                                                                                                                                                                                                                                                                                                                                                                                                                                                                                                                                                                                                                                                                                                                                                                                                                                                                                                                                                                                                                                                                                                                                                                                                                                                                                                                                                                                                                                                                                                                                                                                                                                                                                                                                                                                                                                                                                                                                                                                                                                                                                                                                                                                                                                                   |
|-----------|--------------------------------------------|--------------|----------------|--------------|-----------------------------------------------------------------------------------------------------------------------------------------------------------------------------------------------------------------------------------------------------------------------------------------------------------------------------------------------------------------------------------------------------------------------------------------------------------------------------------------------------------------------------------------------------------------------------------------------------------------------------------------------------------------------------------------------------------------------------------------------------------------------------------------------------------------------------------------------------------------------------------------------------------------------------------------------------------------------------------------------------------------------------------------------------------------------------------------------------------------------------------------------------------------------------------------------------------------------------------------------------------------------------------------------------------------------------------------------------------------------------------------------------------------------------------------------------------------------------------------------------------------------------------------------------------------------------------------------------------------------------------------------------------------------------------------------------------------------------------------------------------------------------------------------------------------------------------------------------------------------------------------------------------------------------------------------------------------------------------------------------------------------------------------------------------------------------------------------------------------------------------------------------------------------------------------------------------------------------------------------------------------------------------------------------------------------------------------------------------------------------------------------------------------------------------|
| GO:015491 | cation:cation<br>antiporter<br>activity    | 4/1695       | 9/276<br>82    | 1.38E<br>-03 | Glyma10G30020,Glyma19G42900,Glyma03G40290,Glyma17G02560                                                                                                                                                                                                                                                                                                                                                                                                                                                                                                                                                                                                                                                                                                                                                                                                                                                                                                                                                                                                                                                                                                                                                                                                                                                                                                                                                                                                                                                                                                                                                                                                                                                                                                                                                                                                                                                                                                                                                                                                                                                                                                                                                                                                                                                                                                                                                                           |
| GO:015385 | sodium:hydro<br>gen antiporter<br>activity | 4/1695       | 9/276<br>82    | 1.38E<br>-03 | Glyma10G30020,Glyma19G42900,Glyma03G40290,Glyma17G02560                                                                                                                                                                                                                                                                                                                                                                                                                                                                                                                                                                                                                                                                                                                                                                                                                                                                                                                                                                                                                                                                                                                                                                                                                                                                                                                                                                                                                                                                                                                                                                                                                                                                                                                                                                                                                                                                                                                                                                                                                                                                                                                                                                                                                                                                                                                                                                           |
| GO:015300 | solute:solute<br>antiporter<br>activity    | 13/1695      | 82/27<br>682   | 1.38E<br>-03 | Glyma10G30020,Glyma13G43950,Glyma03G39320,Glyma08G03320,Glyma17G34780,Glyma19G41890,Glyma13G02910,Glyma19G42900,Glyma03G40290,Glyma17G02560,Glyma06G47110,Glyma06G15970,Glyma03G32900                                                                                                                                                                                                                                                                                                                                                                                                                                                                                                                                                                                                                                                                                                                                                                                                                                                                                                                                                                                                                                                                                                                                                                                                                                                                                                                                                                                                                                                                                                                                                                                                                                                                                                                                                                                                                                                                                                                                                                                                                                                                                                                                                                                                                                             |
| GO:005975 | carbohydrate<br>metabolic<br>process       | 104/169<br>5 | 1270/<br>27682 | 1.51E<br>-03 | Glyma14G03310,Glyma16G04680,Glyma06G15940,Glyma05G36580,Glyma17G05250,Glyma05G24830,Glyma14G37070,Glyma17G08000,Glyma16G29780,Glyma14G04850,Glyma11G18350,Glyma19G31590,Glyma04G09670,Glyma05G31450,Glyma16G32960,Glyma13G41800,Glyma08G40810,Glyma03G08980,Glyma02G10710,Glyma20G38860,Glyma04G09340,Glyma16G34290,Glyma14G34480,Glyma06G30860,Glyma09G27030,Glyma06G09490,Glyma09G23150,Glyma17G33190,Glyma12G20860,Glyma08G03240,Glyma07G12060,Glyma17G03300,Glyma17G07280,Glyma18G06570,Glyma01G36980,Glyma11G13810,Glyma18G52110,Glyma12G01480,Glyma14G03140,Glyma14G39930,Glyma14G33700,Glyma02G36720,Glyma09G08550,Glyma07G12010,Glyma12G01380,Glyma09G39200,Glyma02G12030,Glyma17G14760,Glyma09G30070,Glyma09G38460,Glyma05G30230,Glyma06G12150,Glyma11G07760,Glyma13G05640,Glyma02G07740,Glyma09G07100,Glyma09G28100,Glyma06G14920,Glyma05G26960,Glyma11G11500,Glyma06G09770,Glyma04G30870,Glyma15G23310,Glyma18G19670,Glyma09G21970,Glyma14G05300,Glyma07G07290,Glyma09G26710,Glyma13G02420,Glyma10G4530,Glyma12G36570,Glyma07G12130,Glyma02G07770,Glyma19G07410,Glyma15G02750,Glyma18G52290,Glyma12G31840,Glyma19G00230,Glyma13G42680,Glyma03G00440,Glyma07G01250,Glyma04G39120,Glyma15G37670,Glyma13G33560,Glyma06G03160,Glyma11G38230,Glyma04G03120,Glyma13G38120,Glyma02G05790,Glyma01G45470,Glyma10G34490,Glyma06G15860,Glyma14G07700,Glyma06G17270,Glyma05G03640,Glyma03G27470,Glyma05G03100,Glyma09G28920,Glyma09G39800,Glyma18G02160,Glyma05G08730,Glyma20G08780,Glyma08G20650,Glyma08G39340                                                                                                                                                                                                                                                                                                                                                                                                                                                                                                                                                                                                                                                                                                                                                                                                                                                                                                                    |
| GO:006796 | phosphate<br>metabolic<br>process          | 167/169<br>5 | 2186/<br>27682 | 1.59E<br>-03 | Glyma04G04510,Glyma04G09210,Glyma18G44800,Glyma11G02150,Glyma18G50540,Glyma01G42770,Glyma13G43480,Glyma05G21420,Glyma14G36660,Glyma13G36600,Glyma02G06700,Glyma14G00380,Glyma01G03410,Glyma09G30430,Glyma14G10790,Glyma09G35140,Glyma16G32830,Glyma18G50510,Glyma13G18690,Glyma07G16260,Glyma08G44620,Glyma08G40920,Glyma16G08560,Glyma12G08900,Glyma20G27790,Glyma17G34190,Glyma09G05550,Glyma20G27800,Glyma09G37580,Glyma20G35970,Glyma09G03190,Glyma01G39380,Glyma17G01730,Glyma10G38810,Glyma18G45200,Glyma17G16070,Glyma02G46070,Glyma07G30260,Glyma13G23840,Glyma09G40150,Glyma08G06730,Glyma10G36220,Glyma02G46670,Glyma14G05060,Glyma02G45800,Glyma08G03240,Glyma08G06520,Glyma14G33400,Glyma02G11110,Glyma16G07060,Glyma13G21820,Glyma05G02470,Glyma18G38470,Glyma06G45590,Glyma19G41210,Glyma18G48600,Glyma05G33240,Glyma06G47870,Glyma18G47590,Glyma06G40110,Glyma07G01890,Glyma06G08880,Glyma19G44690,Glyma02G47230,Glyma13G02620,Glyma12G01380,Glyma18G50650,Glyma15G36110,Glyma20G30100,Glyma18G49060,Glyma14G03040,Glyma01G34780,Glyma18G47140,Glyma20G27720,Glyma13G42950,Glyma18G50450,Glyma18G50440,Glyma06G40920,Glyma05G23260,Glyma18G40680,Glyma10G07500,Glyma14G36960,Glyma11G34210,Glyma04G01440,Glyma13G10040,Glyma17G04470,Glyma15G17430,Glyma09G13540,Glyma06G02010,Glyma06G08480,Glyma09G33120,Glyma09G19730,Glyma07G31140,Glyma03G00540,Glyma18G04440,Glyma11G09060,Glyma18G16060,Glyma13G16540,Glyma02G48100,Glyma12G34890,Glyma10G32990,Glyma06G40350,Glyma07G10460,Glyma14G29130,Glyma19G07410,Glyma18G15150,Glyma08G39070,Glyma12G32880,Glyma06G40670,Glyma09G40650,Glyma15G04850,Glyma01G10100,Glyma16G32710,Glyma19G00650,Glyma18G42700,Glyma14G06570,Glyma03G02310,Glyma10G35610,Glyma15G02520,Glyma03G32160,Glyma13G23610,Glyma16G32640,Glyma12G17340,Glyma05G30030,Glyma13G40550,Glyma13G00370,Glyma13G06620,Glyma19G43290,Glyma03G37760,Glyma17G38210,Glyma20G27660,Glyma15G34810,Glyma07G09260,Glyma08G13040,Glyma16G32700,Glyma13G38950,Glyma08G13150,Glyma08G13060,Glyma17G33470,Glyma07G00670,Glyma17G34170,Glyma12G17450,Glyma12G17360,Glyma16G02290,Glyma14G12710,Glyma03G42000,Glyma16G22370,Glyma13G06490,Glyma11G34490,Glyma02G14310,Glyma20G27510,Glyma16G27250,Glyma08G40030,Glyma05G30260,Glyma09G37650,Glyma14G38650,Glyma12G36440,Glyma15G04280,Glyma08G08000,Glyma02G40850,Glyma16G02340,Glyma07G00340,Glyma15G04350,Glyma19G04140,Glyma11G09070,Glyma04G43190,Glyma08G05720 |

|           |                              |              |                |              |                                                                                                                                                                                                                                                                                                                                                                                                                                                                                                                                                                                                                                                                                                                                                                                                                                                                                                                                                                                                                                                                                                                                                                                                                                                                                                                                                                                                                                                                                                                                                                                                                                                                                                                                                                                                                                                                                                                                                                                                                                                                                                                                                                                                                                                                                                                                                                                                                                   |
|-----------|------------------------------|--------------|----------------|--------------|-----------------------------------------------------------------------------------------------------------------------------------------------------------------------------------------------------------------------------------------------------------------------------------------------------------------------------------------------------------------------------------------------------------------------------------------------------------------------------------------------------------------------------------------------------------------------------------------------------------------------------------------------------------------------------------------------------------------------------------------------------------------------------------------------------------------------------------------------------------------------------------------------------------------------------------------------------------------------------------------------------------------------------------------------------------------------------------------------------------------------------------------------------------------------------------------------------------------------------------------------------------------------------------------------------------------------------------------------------------------------------------------------------------------------------------------------------------------------------------------------------------------------------------------------------------------------------------------------------------------------------------------------------------------------------------------------------------------------------------------------------------------------------------------------------------------------------------------------------------------------------------------------------------------------------------------------------------------------------------------------------------------------------------------------------------------------------------------------------------------------------------------------------------------------------------------------------------------------------------------------------------------------------------------------------------------------------------------------------------------------------------------------------------------------------------|
| GO:006793 | phosphorus metabolic process | 167/169<br>5 | 2186/<br>27682 | 1.59E<br>-03 | Glyma04G04510,Glyma04G09210,Glyma18G44800,Glyma11G02150,Glyma18G50540,Glyma01G42770,Glyma13G43480,Glyma05G21420,Glyma14G36660,Glyma13G36600,Glyma02G06700,Glyma14G00380,Glyma01G03410,Glyma09G30430,Glyma14G10790,Glyma09G35140,Glyma16G32830,Glyma18G50510,Glyma13G18690,Glyma07G16260,Glyma08G44620,Glyma08G40920,Glyma16G08560,Glyma12G08900,Glyma20G27790,Glyma17G34190,Glyma09G05550,Glyma20G27800,Glyma09G37580,Glyma20G35970,Glyma09G03190,Glyma01G39380,Glyma17G01730,Glyma10G38810,Glyma18G45200,Glyma17G16070,Glyma02G46070,Glyma07G30260,Glyma13G23840,Glyma09G40150,Glyma08G06730,Glyma10G36220,Glyma02G46670,Glyma14G05060,Glyma02G45800,Glyma08G03240,Glyma08G06520,Glyma14G33400,Glyma02G11110,Glyma16G07060,Glyma13G21820,Glyma05G02470,Glyma18G38470,Glyma06G45590,Glyma19G41210,Glyma18G48600,Glyma05G33240,Glyma06G47870,Glyma18G47590,Glyma06G40110,Glyma07G01890,Glyma06G08880,Glyma19G44690,Glyma02G47230,Glyma13G02620,Glyma12G01380,Glyma18G50650,Glyma15G36110,Glyma20G30100,Glyma18G49060,Glyma14G03040,Glyma01G34780,Glyma18G47140,Glyma20G27720,Glyma13G42950,Glyma18G50450,Glyma18G50440,Glyma06G40920,Glyma05G23260,Glyma18G40680,Glyma10G07500,Glyma14G36960,Glyma11G34210,Glyma04G01440,Glyma13G10040,Glyma17G04470,Glyma15G17430,Glyma09G13540,Glyma06G02010,Glyma06G08480,Glyma09G33120,Glyma09G19730,Glyma07G31140,Glyma03G00540,Glyma18G04440,Glyma11G09060,Glyma18G16060,Glyma13G16540,Glyma02G48100,Glyma12G34890,Glyma10G32990,Glyma06G40350,Glyma07G10460,Glyma14G29130,Glyma19G07410,Glyma18G15150,Glyma08G39070,Glyma12G32880,Glyma06G40670,Glyma09G40650,Glyma15G04850,Glyma01G10100,Glyma16G32710,Glyma19G00650,Glyma18G42700,Glyma14G06570,Glyma03G02310,Glyma10G35610,Glyma15G02520,Glyma03G32160,Glyma13G23610,Glyma16G32640,Glyma12G17340,Glyma05G30030,Glyma13G40550,Glyma13G00370,Glyma13G06620,Glyma19G43290,Glyma03G37760,Glyma17G38210,Glyma20G27660,Glyma15G34810,Glyma07G09260,Glyma08G13040,Glyma16G32700,Glyma13G38950,Glyma08G13150,Glyma08G13060,Glyma17G33470,Glyma07G00670,Glyma17G34170,Glyma12G17450,Glyma12G17360,Glyma16G02290,Glyma14G12710,Glyma03G42000,Glyma16G22370,Glyma13G06490,Glyma11G34490,Glyma02G14310,Glyma20G27510,Glyma16G27250,Glyma08G40030,Glyma05G30260,Glyma09G37650,Glyma14G38650,Glyma12G36440,Glyma15G04280,Glyma08G08000,Glyma02G40850,Glyma16G02340,Glyma07G00340,Glyma15G04350,Glyma19G04140,Glyma11G09070,Glyma04G43190,Glyma08G05720 |
| GO:002376 | immune system process        | 20/1695      | 158/2<br>7682  | 1.63E<br>-03 | Glyma16G10080,Glyma01G27440,Glyma06G40980,Glyma16G25010,Glyma09G29080,Glyma16G24940,Glyma02G03760,Glyma16G34030,Glyma16G03780,Glyma06G40690,Glyma16G33950,Glyma06G40740,Glyma12G16450,Glyma20G06780,Glyma16G33590,Glyma06G41880,Glyma06G40780,Glyma10G32800,Glyma06G41430,Glyma06G40710                                                                                                                                                                                                                                                                                                                                                                                                                                                                                                                                                                                                                                                                                                                                                                                                                                                                                                                                                                                                                                                                                                                                                                                                                                                                                                                                                                                                                                                                                                                                                                                                                                                                                                                                                                                                                                                                                                                                                                                                                                                                                                                                           |
| GO:045087 | innate immune response       | 20/1695      | 158/2<br>7682  | 1.63E<br>-03 | Glyma16G10080,Glyma01G27440,Glyma06G40980,Glyma16G25010,Glyma09G29080,Glyma16G24940,Glyma02G03760,Glyma16G34030,Glyma16G03780,Glyma06G40690,Glyma16G33950,Glyma06G40740,Glyma12G16450,Glyma20G06780,Glyma16G33590,Glyma06G41880,Glyma06G40780,Glyma10G32800,Glyma06G41430,Glyma06G40710                                                                                                                                                                                                                                                                                                                                                                                                                                                                                                                                                                                                                                                                                                                                                                                                                                                                                                                                                                                                                                                                                                                                                                                                                                                                                                                                                                                                                                                                                                                                                                                                                                                                                                                                                                                                                                                                                                                                                                                                                                                                                                                                           |
| GO:006955 | immune response              | 20/1695      | 158/2<br>7682  | 1.63E<br>-03 | Glyma16G10080,Glyma01G27440,Glyma06G40980,Glyma16G25010,Glyma09G29080,Glyma16G24940,Glyma02G03760,Glyma16G34030,Glyma16G03780,Glyma06G40690,Glyma16G33950,Glyma06G40740,Glyma12G16450,Glyma20G06780,Glyma16G33590,Glyma06G41880,Glyma06G40780,Glyma10G32800,Glyma06G41430,Glyma06G40710                                                                                                                                                                                                                                                                                                                                                                                                                                                                                                                                                                                                                                                                                                                                                                                                                                                                                                                                                                                                                                                                                                                                                                                                                                                                                                                                                                                                                                                                                                                                                                                                                                                                                                                                                                                                                                                                                                                                                                                                                                                                                                                                           |
| GO:016887 | ATPase activity              | 53/1695      | 571/2<br>7682  | 1.76E<br>-03 | Glyma08G41510,Glyma13G10530,Glyma20G26160,Glyma05G01460,Glyma07G08120,Glyma15G20000,Glyma03G32530,Glyma16G21050,Glyma01G41150,Glyma09G05710,Glyma12G04410,Glyma20G29060,Glyma15G00670,Glyma11G37910,Glyma18G08870,Glyma06G20200,Glyma09G34860,Glyma15G00340,Glyma12G33340,Glyma09G02930,Glyma19G38970,Glyma19G35270,Glyma05G03440,Glyma16G10760,Glyma20G16170,Glyma04G34140,Glyma05G34180,Glyma05G25550,Glyma17G10420,Glyma09G38730,Glyma09G08370,Glyma07G11880,Glyma03G29230,Glyma18G07080,Glyma17G30980,Glyma06G15900,Glyma20G38380,Glyma06G20360,Glyma20G34060,Glyma20G38610,Glyma19G34250,Glyma04G39670,Glyma01G07970,Glyma06G21140,Glyma02G09080,Glyma20G23010,Glyma03G33590,Glyma10G35310,Glyma08G23150,Glyma07G02940,Glyma08G46130,Glyma03G36310,Glyma09G08180                                                                                                                                                                                                                                                                                                                                                                                                                                                                                                                                                                                                                                                                                                                                                                                                                                                                                                                                                                                                                                                                                                                                                                                                                                                                                                                                                                                                                                                                                                                                                                                                                                                             |

1. Maere S. *et al.* BiNGO: a Cytoscape plugin to assess overrepresentation of gene ontology categories in biological networks. *Bioinformatics*, **21**, 3448-3449 (2005).

2. Falcon S. & Gentleman R. Using GOSTats to test gene lists for GO term association. *Bioinformatics*, **23**, 257–258 (2007).



**Supplementary Table 6. Region of Present Absent Variation (PAV) in three gene pools (wild, landrace and elite) and gene list.**

| PAV_genes    | Wild | Landrace | Elite | Interpro                                                                                                                |
|--------------|------|----------|-------|-------------------------------------------------------------------------------------------------------------------------|
| GlymaPAV0000 | 0    | 3        | 3     | IPR005162; Retrotransposon gag protein                                                                                  |
| GlymaPAV0001 | 0    | 1        | 0     | IPR000780; MCP methyltransferase, CheR-type IPR022642; MCP methyltransferase, CheR-type, SAM-binding domain, C-terminal |
| GlymaPAV0002 | 5    | 5        | 12    | IPR005162; Retrotransposon gag protein                                                                                  |
| GlymaPAV0003 | 3    | 3        | 0     |                                                                                                                         |
| GlymaPAV0004 | 3    | 4        | 5     |                                                                                                                         |
| GlymaPAV0005 | 0    | 1        | 2     |                                                                                                                         |
| GlymaPAV0006 | 0    | 0        | 2     |                                                                                                                         |
| GlymaPAV0007 | 0    | 0        | 10    |                                                                                                                         |
| GlymaPAV0008 | 2    | 9        | 0     | IPR001128; Cytochrome P450                                                                                              |
| GlymaPAV0009 | 1    | 0        | 0     | IPR005162; Retrotransposon gag protein                                                                                  |
| GlymaPAV0010 | 3    | 2        | 4     | IPR002559; Transposase, IS4-like IPR003201; Transposase Tn5, dimerisation                                               |
| GlymaPAV0011 | 1    | 0        | 2     |                                                                                                                         |
| GlymaPAV0012 | 0    | 2        | 2     | IPR002525; Transposase, IS111A/IS1328/IS1533, N-terminal IPR003346; Transposase, IS116/IS110/IS902                      |
| GlymaPAV0013 | 0    | 6        | 3     |                                                                                                                         |
| GlymaPAV0014 | 1    | 6        | 0     |                                                                                                                         |
| GlymaPAV0015 | 0    | 0        | 1     |                                                                                                                         |
| GlymaPAV0016 | 0    | 0        | 1     |                                                                                                                         |
| GlymaPAV0017 | 1    | 10       | 4     |                                                                                                                         |
| GlymaPAV0018 | 0    | 1        | 1     |                                                                                                                         |
| GlymaPAV0019 | 3    | 3        | 1     | IPR005162; Retrotransposon gag protein                                                                                  |
| GlymaPAV0020 | 0    | 1        | 0     |                                                                                                                         |
| GlymaPAV0021 | 0    | 2        | 0     | IPR007087; Zinc finger, C2H2-type IPR015880; Zinc finger, C2H2-like                                                     |
| GlymaPAV0022 | 0    | 0        | 2     |                                                                                                                         |
| GlymaPAV0023 | 3    | 0        | 4     |                                                                                                                         |
| GlymaPAV0024 | 0    | 0        | 1     | IPR002068; Heat shock protein Hsp20                                                                                     |
| GlymaPAV0025 | 0    | 1        | 1     | IPR000157; Toll-Interleukin receptor                                                                                    |
| GlymaPAV0026 | 0    | 1        | 0     | IPR000568; ATPase, F0 complex, subunit A IPR023011; ATPase, F0 complex, subunit A, active site                          |
| GlymaPAV0027 | 1    | 1        | 0     |                                                                                                                         |
| GlymaPAV0028 | 0    | 4        | 2     | IPR015706; RNA-directed DNA polymerase (reverse transcriptase)                                                          |
| GlymaPAV0029 | 1    | 11       | 4     | IPR013103; Reverse transcriptase, RNA-dependent DNA polymerase                                                          |
| GlymaPAV0030 | 7    | 11       | 4     | IPR001611; Leucine-rich repeat                                                                                          |
| GlymaPAV0031 | 1    | 1        | 6     | IPR001584; Integrase, catalytic core                                                                                    |
| GlymaPAV0032 | 1    | 0        | 0     | IPR001584; Integrase, catalytic core                                                                                    |
| GlymaPAV0033 | 4    | 4        | 3     | IPR001584; Integrase, catalytic core IPR015416; Zinc finger, H2C2-type, histone UAS binding                             |
| GlymaPAV0034 | 1    | 0        | 0     | IPR000719; Protein kinase, catalytic domain IPR017442; Serine/threonine-protein kinase-like domain                      |
| GlymaPAV0035 | 0    | 1        | 0     |                                                                                                                         |
| GlymaPAV0036 | 3    | 0        | 0     |                                                                                                                         |
| GlymaPAV0037 | 1    | 1        | 5     |                                                                                                                         |
| GlymaPAV0038 | 1    | 0        | 0     | IPR000477; Reverse transcriptase IPR015706; RNA-directed DNA polymerase (reverse transcriptase)                         |
| GlymaPAV0039 | 2    | 0        | 0     |                                                                                                                         |
| GlymaPAV0040 | 1    | 0        | 0     |                                                                                                                         |
| GlymaPAV0041 | 1    | 2        | 0     | IPR001584; Integrase, catalytic core IPR015416; Zinc finger, H2C2-type, histone UAS binding                             |
| GlymaPAV0042 | 0    | 0        | 2     |                                                                                                                         |
| GlymaPAV0043 | 6    | 5        | 0     | IPR000477; Reverse transcriptase IPR015706; RNA-directed DNA polymerase (reverse transcriptase)                         |
| GlymaPAV0044 | 2    | 0        | 0     |                                                                                                                         |
| GlymaPAV0045 | 0    | 1        | 1     | IPR013103; Reverse transcriptase, RNA-dependent DNA polymerase                                                          |
| GlymaPAV0046 | 3    | 23       | 8     |                                                                                                                         |
| GlymaPAV0047 | 0    | 0        | 1     | IPR000477; Reverse transcriptase IPR015706; RNA-directed DNA polymerase (reverse transcriptase)                         |
| GlymaPAV0048 | 1    | 1        | 1     |                                                                                                                         |
| GlymaPAV0049 | 1    | 5        | 2     | IPR019557; Aminotransferase-like, plant mobile domain                                                                   |
| GlymaPAV0050 | 0    | 2        | 0     |                                                                                                                         |

|              |   |    |    |                                                                                             |
|--------------|---|----|----|---------------------------------------------------------------------------------------------|
| GlymaPAV0051 | 0 | 1  | 1  | IPR001584; Integrase, catalytic core                                                        |
| GlymaPAV0052 | 7 | 0  | 4  | IPR013103; Reverse transcriptase, RNA-dependent DNA polymerase                              |
| GlymaPAV0053 | 1 | 9  | 5  | IPR001584; Integrase, catalytic core                                                        |
| GlymaPAV0054 | 0 | 5  | 1  |                                                                                             |
| GlymaPAV0055 | 2 | 2  | 6  | IPR013103; Reverse transcriptase, RNA-dependent DNA polymerase                              |
| GlymaPAV0056 | 1 | 4  | 0  |                                                                                             |
| GlymaPAV0057 | 1 | 2  | 4  | IPR001584; Integrase, catalytic core                                                        |
| GlymaPAV0058 | 6 | 15 | 28 | IPR001584; Integrase, catalytic core IPR015416; Zinc finger, H2C2-type, histone UAS binding |
| GlymaPAV0059 | 2 | 1  | 0  | IPR019557; Aminotransferase-like, plant mobile domain                                       |
| GlymaPAV0060 | 0 | 12 | 0  |                                                                                             |
| GlymaPAV0061 | 0 | 0  | 1  |                                                                                             |
| GlymaPAV0062 | 1 | 0  | 0  |                                                                                             |
| GlymaPAV0063 | 1 | 0  | 0  |                                                                                             |
| GlymaPAV0064 | 0 | 1  | 0  | IPR013103; Reverse transcriptase, RNA-dependent DNA polymerase                              |
| GlymaPAV0065 | 4 | 3  | 6  | IPR001584; Integrase, catalytic core                                                        |
| GlymaPAV0066 | 4 | 2  | 0  | IPR000477; Reverse transcriptase                                                            |
| GlymaPAV0067 | 2 | 0  | 0  |                                                                                             |
| GlymaPAV0068 | 9 | 38 | 37 | IPR005162; Retrotransposon gag protein                                                      |
| GlymaPAV0069 | 1 | 16 | 11 | IPR013103; Reverse transcriptase, RNA-dependent DNA polymerase                              |
| GlymaPAV0070 | 2 | 2  | 0  | IPR019557; Aminotransferase-like, plant mobile domain                                       |
| GlymaPAV0071 | 7 | 4  | 3  | IPR013103; Reverse transcriptase, RNA-dependent DNA polymerase                              |
| GlymaPAV0072 | 1 | 2  | 0  |                                                                                             |
| GlymaPAV0073 | 0 | 2  | 0  |                                                                                             |
| GlymaPAV0074 | 0 | 1  | 1  | IPR001584; Integrase, catalytic core                                                        |
| GlymaPAV0075 | 1 | 0  | 0  |                                                                                             |
| GlymaPAV0076 | 0 | 1  | 0  | IPR001584; Integrase, catalytic core                                                        |
| GlymaPAV0077 | 4 | 0  | 2  | IPR005162; Retrotransposon gag protein                                                      |
| GlymaPAV0078 | 1 | 3  | 9  | IPR004242; Transposon, En/Spm-like                                                          |
| GlymaPAV0079 | 0 | 3  | 4  |                                                                                             |
| GlymaPAV0080 | 1 | 2  | 1  |                                                                                             |
| GlymaPAV0081 | 1 | 0  | 0  | IPR013103; Reverse transcriptase, RNA-dependent DNA polymerase                              |
| GlymaPAV0082 | 1 | 2  | 2  |                                                                                             |
| GlymaPAV0083 | 1 | 1  | 0  |                                                                                             |
| GlymaPAV0084 | 1 | 7  | 1  | IPR001584; Integrase, catalytic core                                                        |
| GlymaPAV0085 | 0 | 1  | 0  |                                                                                             |
| GlymaPAV0086 | 2 | 0  | 4  | IPR001022; Tobamoviral movement protein                                                     |
| GlymaPAV0087 | 0 | 1  | 2  |                                                                                             |
| GlymaPAV0088 | 1 | 5  | 4  |                                                                                             |
| GlymaPAV0089 | 2 | 0  | 0  |                                                                                             |
| GlymaPAV0090 | 5 | 10 | 20 | IPR015416; Zinc finger, H2C2-type, histone UAS binding                                      |
| GlymaPAV0091 | 1 | 2  | 0  |                                                                                             |
| GlymaPAV0092 | 0 | 0  | 1  | IPR013103; Reverse transcriptase, RNA-dependent DNA polymerase                              |
| GlymaPAV0093 | 7 | 29 | 31 |                                                                                             |
| GlymaPAV0094 | 2 | 7  | 4  | IPR001584; Integrase, catalytic core                                                        |
| GlymaPAV0095 | 5 | 2  | 6  |                                                                                             |
| GlymaPAV0096 | 4 | 5  | 14 | IPR013103; Reverse transcriptase, RNA-dependent DNA polymerase                              |
| GlymaPAV0097 | 0 | 0  | 4  |                                                                                             |
| GlymaPAV0098 | 0 | 0  | 1  | IPR001584; Integrase, catalytic core                                                        |
| GlymaPAV0099 | 0 | 2  | 4  |                                                                                             |
| GlymaPAV0100 | 2 | 19 | 12 |                                                                                             |
| GlymaPAV0101 | 5 | 16 | 20 | IPR013103; Reverse transcriptase, RNA-dependent DNA polymerase                              |
| GlymaPAV0102 | 3 | 7  | 5  | IPR001584; Integrase, catalytic core                                                        |
| GlymaPAV0103 | 0 | 1  | 2  | IPR013103; Reverse transcriptase, RNA-dependent DNA polymerase                              |
| GlymaPAV0104 | 2 | 0  | 1  | IPR013103; Reverse transcriptase, RNA-dependent DNA polymerase                              |
| GlymaPAV0105 | 4 | 1  | 13 |                                                                                             |
| GlymaPAV0106 | 1 | 0  | 0  | IPR001584; Integrase, catalytic core                                                        |
| GlymaPAV0107 | 2 | 2  | 0  | IPR001584; Integrase, catalytic core                                                        |
| GlymaPAV0108 | 1 | 2  | 6  |                                                                                             |

|              |   |    |    |                                                                |
|--------------|---|----|----|----------------------------------------------------------------|
| GlymaPAV0109 | 2 | 11 | 9  | IPR013103; Reverse transcriptase, RNA-dependent DNA polymerase |
| GlymaPAV0110 | 1 | 17 | 0  | IPR001584; Integrase, catalytic core                           |
| GlymaPAV0111 | 0 | 5  | 9  | IPR013103; Reverse transcriptase, RNA-dependent DNA polymerase |
| GlymaPAV0112 | 3 | 2  | 0  | IPR001584; Integrase, catalytic core                           |
| GlymaPAV0113 | 5 | 0  | 0  | IPR013103; Reverse transcriptase, RNA-dependent DNA polymerase |
| GlymaPAV0114 | 5 | 2  | 15 | IPR013103; Reverse transcriptase, RNA-dependent DNA polymerase |
| GlymaPAV0115 | 4 | 22 | 10 | IPR001584; Integrase, catalytic core                           |
| GlymaPAV0116 | 0 | 3  | 1  | IPR005162; Retrotransposon gag protein                         |
| GlymaPAV0117 | 0 | 3  | 2  | IPR013103; Reverse transcriptase, RNA-dependent DNA polymerase |
| GlymaPAV0118 | 1 | 3  | 8  |                                                                |
| GlymaPAV0119 | 1 | 7  | 4  |                                                                |
| GlymaPAV0120 | 0 | 0  | 1  |                                                                |
| GlymaPAV0121 | 2 | 0  | 3  |                                                                |
| GlymaPAV0122 | 3 | 4  | 9  | IPR013103; Reverse transcriptase, RNA-dependent DNA polymerase |
| GlymaPAV0123 | 0 | 2  | 0  | IPR013103; Reverse transcriptase, RNA-dependent DNA polymerase |
| GlymaPAV0124 | 1 | 0  | 2  |                                                                |
| GlymaPAV0125 | 6 | 0  | 0  | IPR001584; Integrase, catalytic core                           |
| GlymaPAV0126 | 4 | 10 | 6  |                                                                |
| GlymaPAV0127 | 2 | 3  | 2  |                                                                |
| GlymaPAV0128 | 4 | 5  | 15 |                                                                |
| GlymaPAV0129 | 1 | 1  | 4  |                                                                |
| GlymaPAV0130 | 1 | 0  | 0  | IPR019557; Aminotransferase-like, plant mobile domain          |
| GlymaPAV0131 | 4 | 0  | 0  |                                                                |
| GlymaPAV0132 | 3 | 0  | 0  |                                                                |
| GlymaPAV0133 | 0 | 4  | 3  |                                                                |
| GlymaPAV0134 | 0 | 1  | 2  | IPR000477; Reverse transcriptase                               |
| GlymaPAV0135 | 4 | 0  | 0  |                                                                |
| GlymaPAV0136 | 1 | 4  | 0  |                                                                |
| GlymaPAV0137 | 5 | 0  | 0  |                                                                |
| GlymaPAV0138 | 1 | 0  | 3  |                                                                |
| GlymaPAV0139 | 1 | 0  | 3  | IPR015706; RNA-directed DNA polymerase (reverse transcriptase) |
| GlymaPAV0140 | 0 | 1  | 0  |                                                                |
| GlymaPAV0141 | 0 | 0  | 5  |                                                                |
| GlymaPAV0142 | 0 | 8  | 1  |                                                                |
| GlymaPAV0143 | 0 | 0  | 1  |                                                                |
| GlymaPAV0144 | 0 | 3  | 0  |                                                                |
| GlymaPAV0145 | 0 | 1  | 1  |                                                                |
| GlymaPAV0146 | 2 | 0  | 4  |                                                                |
| GlymaPAV0147 | 1 | 0  | 0  |                                                                |
| GlymaPAV0148 | 0 | 4  | 0  |                                                                |
| GlymaPAV0149 | 3 | 1  | 2  |                                                                |
| GlymaPAV0150 | 0 | 0  | 4  |                                                                |
| GlymaPAV0151 | 1 | 5  | 0  |                                                                |
| GlymaPAV0152 | 3 | 7  | 1  |                                                                |
| GlymaPAV0153 | 3 | 2  | 1  |                                                                |
| GlymaPAV0154 | 0 | 0  | 1  |                                                                |
| GlymaPAV0155 | 1 | 0  | 8  |                                                                |
| GlymaPAV0156 | 0 | 0  | 1  | IPR001584; Integrase, catalytic core                           |
| GlymaPAV0157 | 0 | 3  | 0  |                                                                |
| GlymaPAV0158 | 1 | 3  | 1  |                                                                |
| GlymaPAV0159 | 5 | 0  | 0  |                                                                |
| GlymaPAV0160 | 2 | 0  | 0  | IPR015706; RNA-directed DNA polymerase (reverse transcriptase) |
| GlymaPAV0161 | 0 | 3  | 2  |                                                                |
| GlymaPAV0162 | 2 | 0  | 2  |                                                                |
| GlymaPAV0163 | 1 | 2  | 3  |                                                                |
| GlymaPAV0164 | 0 | 1  | 2  | IPR000477; Reverse transcriptase                               |
| GlymaPAV0165 | 0 | 1  | 1  | IPR015706; RNA-directed DNA polymerase (reverse transcriptase) |
| GlymaPAV0166 | 1 | 0  | 3  |                                                                |

|              |   |    |    |                                                                |
|--------------|---|----|----|----------------------------------------------------------------|
| GlymaPAV0167 | 2 | 0  | 0  |                                                                |
| GlymaPAV0168 | 2 | 3  | 0  |                                                                |
| GlymaPAV0169 | 1 | 0  | 0  |                                                                |
| GlymaPAV0170 | 3 | 6  | 3  | IPR000504; RNA recognition motif domain                        |
| GlymaPAV0171 | 1 | 3  | 6  |                                                                |
| GlymaPAV0172 | 0 | 0  | 1  |                                                                |
| GlymaPAV0173 | 4 | 4  | 0  |                                                                |
| GlymaPAV0174 | 4 | 15 | 9  |                                                                |
| GlymaPAV0175 | 1 | 0  | 0  |                                                                |
| GlymaPAV0176 | 1 | 0  | 2  |                                                                |
| GlymaPAV0177 | 1 | 4  | 0  |                                                                |
| GlymaPAV0178 | 0 | 4  | 0  |                                                                |
| GlymaPAV0179 | 1 | 5  | 0  |                                                                |
| GlymaPAV0180 | 4 | 9  | 12 |                                                                |
| GlymaPAV0181 | 1 | 15 | 3  | IPR000477; Reverse transcriptase                               |
| GlymaPAV0182 | 3 | 9  | 2  |                                                                |
| GlymaPAV0183 | 2 | 1  | 11 |                                                                |
| GlymaPAV0184 | 1 | 2  | 0  |                                                                |
| GlymaPAV0185 | 3 | 0  | 3  |                                                                |
| GlymaPAV0186 | 1 | 0  | 0  |                                                                |
| GlymaPAV0187 | 0 | 0  | 5  |                                                                |
| GlymaPAV0188 | 1 | 1  | 2  |                                                                |
| GlymaPAV0189 | 0 | 6  | 2  |                                                                |
| GlymaPAV0190 | 0 | 12 | 0  |                                                                |
| GlymaPAV0191 | 2 | 6  | 3  |                                                                |
| GlymaPAV0192 | 0 | 0  | 1  |                                                                |
| GlymaPAV0193 | 1 | 2  | 1  |                                                                |
| GlymaPAV0194 | 2 | 0  | 3  |                                                                |
| GlymaPAV0195 | 0 | 1  | 1  |                                                                |
| GlymaPAV0196 | 1 | 2  | 2  |                                                                |
| GlymaPAV0197 | 3 | 1  | 3  |                                                                |
| GlymaPAV0198 | 2 | 3  | 1  |                                                                |
| GlymaPAV0199 | 0 | 4  | 2  |                                                                |
| GlymaPAV0200 | 0 | 0  | 1  |                                                                |
| GlymaPAV0201 | 1 | 21 | 2  |                                                                |
| GlymaPAV0202 | 0 | 5  | 0  |                                                                |
| GlymaPAV0203 | 2 | 0  | 0  |                                                                |
| GlymaPAV0204 | 1 | 0  | 0  |                                                                |
| GlymaPAV0205 | 0 | 0  | 4  | IPR015706; RNA-directed DNA polymerase (reverse transcriptase) |
| GlymaPAV0206 | 2 | 1  | 1  |                                                                |
| GlymaPAV0207 | 5 | 2  | 2  |                                                                |
| GlymaPAV0208 | 5 | 2  | 4  |                                                                |
| GlymaPAV0209 | 6 | 0  | 4  |                                                                |
| GlymaPAV0210 | 2 | 0  | 2  |                                                                |
| GlymaPAV0211 | 1 | 1  | 0  |                                                                |
| GlymaPAV0212 | 0 | 0  | 3  |                                                                |
| GlymaPAV0213 | 3 | 0  | 0  | IPR001878; Zinc finger, CCHC-type                              |
| GlymaPAV0214 | 0 | 7  | 0  |                                                                |
| GlymaPAV0215 | 3 | 3  | 1  |                                                                |
| GlymaPAV0216 | 0 | 1  | 2  |                                                                |
| GlymaPAV0217 | 0 | 1  | 2  |                                                                |
| GlymaPAV0218 | 1 | 2  | 0  |                                                                |
| GlymaPAV0219 | 4 | 0  | 2  |                                                                |
| GlymaPAV0220 | 7 | 1  | 3  |                                                                |
| GlymaPAV0221 | 0 | 2  | 1  |                                                                |
| GlymaPAV0222 | 2 | 3  | 5  |                                                                |
| GlymaPAV0223 | 2 | 0  | 2  |                                                                |
| GlymaPAV0224 | 1 | 1  | 1  |                                                                |

|              |   |    |    |
|--------------|---|----|----|
| GlymaPAV0225 | 1 | 1  | 7  |
| GlymaPAV0226 | 0 | 0  | 1  |
| GlymaPAV0227 | 0 | 0  | 2  |
| GlymaPAV0228 | 0 | 3  | 10 |
| GlymaPAV0229 | 1 | 0  | 0  |
| GlymaPAV0230 | 1 | 0  | 2  |
| GlymaPAV0231 | 0 | 1  | 2  |
| GlymaPAV0232 | 0 | 1  | 4  |
| GlymaPAV0233 | 5 | 6  | 1  |
| GlymaPAV0234 | 1 | 10 | 5  |
| GlymaPAV0235 | 0 | 0  | 2  |
| GlymaPAV0236 | 3 | 1  | 2  |
| GlymaPAV0237 | 0 | 0  | 1  |
| GlymaPAV0238 | 2 | 0  | 0  |
| GlymaPAV0239 | 1 | 0  | 1  |
| GlymaPAV0240 | 4 | 1  | 11 |
| GlymaPAV0241 | 2 | 0  | 2  |
| GlymaPAV0242 | 6 | 2  | 5  |
| GlymaPAV0243 | 3 | 0  | 1  |
| GlymaPAV0244 | 0 | 1  | 0  |
| GlymaPAV0245 | 0 | 1  | 0  |
| GlymaPAV0246 | 1 | 1  | 4  |
| GlymaPAV0247 | 2 | 14 | 0  |
| GlymaPAV0248 | 0 | 0  | 4  |
| GlymaPAV0249 | 0 | 1  | 5  |
| GlymaPAV0250 | 8 | 1  | 3  |
| GlymaPAV0251 | 3 | 0  | 0  |
| GlymaPAV0252 | 4 | 5  | 19 |
| GlymaPAV0253 | 0 | 3  | 5  |
| GlymaPAV0254 | 0 | 1  | 0  |
| GlymaPAV0255 | 1 | 2  | 1  |
| GlymaPAV0256 | 2 | 10 | 9  |
| GlymaPAV0257 | 5 | 15 | 27 |
| GlymaPAV0258 | 2 | 0  | 0  |
| GlymaPAV0259 | 0 | 2  | 2  |
| GlymaPAV0260 | 4 | 0  | 0  |
| GlymaPAV0261 | 1 | 1  | 8  |
| GlymaPAV0262 | 0 | 2  | 0  |
| GlymaPAV0263 | 0 | 0  | 2  |
| GlymaPAV0264 | 1 | 0  | 0  |
| GlymaPAV0265 | 1 | 1  | 4  |
| GlymaPAV0266 | 0 | 4  | 0  |
| GlymaPAV0267 | 5 | 2  | 1  |
| GlymaPAV0268 | 0 | 1  | 1  |
| GlymaPAV0269 | 0 | 3  | 0  |
| GlymaPAV0270 | 1 | 1  | 2  |
| GlymaPAV0271 | 0 | 7  | 1  |
| GlymaPAV0272 | 1 | 3  | 9  |
| GlymaPAV0273 | 1 | 0  | 0  |
| GlymaPAV0274 | 2 | 2  | 6  |
| GlymaPAV0275 | 5 | 1  | 6  |
| GlymaPAV0276 | 0 | 1  | 2  |
| GlymaPAV0277 | 2 | 5  | 1  |
| GlymaPAV0278 | 0 | 1  | 1  |
| GlymaPAV0279 | 6 | 13 | 6  |
| GlymaPAV0280 | 1 | 0  | 2  |
| GlymaPAV0281 | 3 | 3  | 3  |
| GlymaPAV0282 | 0 | 6  | 0  |

IPR018150; Aminoacyl-tRNA synthetase, class II (D/K/N)-like

IPR001878; Zinc finger, CCHC-type  
IPR019557; Aminotransferase-like, plant mobile domain

|              |   |    |    |                                                                                             |
|--------------|---|----|----|---------------------------------------------------------------------------------------------|
| GlymaPAV0283 | 1 | 2  | 6  |                                                                                             |
| GlymaPAV0284 | 0 | 0  | 1  | IPR004158; Protein of unknown function DUF247, plant                                        |
| GlymaPAV0285 | 0 | 0  | 1  |                                                                                             |
| GlymaPAV0286 | 0 | 0  | 1  |                                                                                             |
| GlymaPAV0287 | 0 | 5  | 2  |                                                                                             |
| GlymaPAV0288 | 0 | 1  | 1  |                                                                                             |
| GlymaPAV0289 | 2 | 0  | 0  |                                                                                             |
| GlymaPAV0290 | 2 | 1  | 2  |                                                                                             |
| GlymaPAV0291 | 1 | 2  | 0  | IPR000953; Chromo domain                                                                    |
| GlymaPAV0292 | 1 | 13 | 11 |                                                                                             |
| GlymaPAV0293 | 1 | 2  | 2  | IPR008906; HAT dimerisation                                                                 |
| GlymaPAV0294 | 0 | 0  | 1  |                                                                                             |
| GlymaPAV0295 | 3 | 4  | 2  |                                                                                             |
| GlymaPAV0296 | 1 | 0  | 1  | IPR000782; FAS1 domain                                                                      |
| GlymaPAV0297 | 0 | 2  | 0  |                                                                                             |
| GlymaPAV0298 | 2 | 5  | 10 |                                                                                             |
| GlymaPAV0299 | 2 | 13 | 8  | IPR015706; RNA-directed DNA polymerase (reverse transcriptase)                              |
| GlymaPAV0300 | 5 | 5  | 9  | IPR001611; Leucine-rich repeat IPR013210; Leucine-rich repeat-containing N-terminal, type 2 |
| GlymaPAV0301 | 0 | 0  | 3  |                                                                                             |
| GlymaPAV0302 | 4 | 3  | 0  |                                                                                             |
| GlymaPAV0303 | 4 | 6  | 3  |                                                                                             |
| GlymaPAV0304 | 7 | 26 | 40 | IPR013242; Retroviral aspartyl protease                                                     |
| GlymaPAV0305 | 2 | 3  | 0  |                                                                                             |
| GlymaPAV0306 | 4 | 16 | 7  |                                                                                             |
| GlymaPAV0307 | 3 | 0  | 0  |                                                                                             |
| GlymaPAV0308 | 0 | 0  | 2  |                                                                                             |
| GlymaPAV0309 | 1 | 7  | 3  |                                                                                             |
| GlymaPAV0310 | 0 | 0  | 2  |                                                                                             |
| GlymaPAV0311 | 2 | 1  | 0  |                                                                                             |
| GlymaPAV0312 | 5 | 18 | 20 |                                                                                             |
| GlymaPAV0313 | 2 | 1  | 2  |                                                                                             |
| GlymaPAV0314 | 1 | 1  | 2  |                                                                                             |
| GlymaPAV0315 | 4 | 2  | 2  |                                                                                             |
| GlymaPAV0316 | 0 | 0  | 1  |                                                                                             |
| GlymaPAV0317 | 1 | 2  | 1  |                                                                                             |
| GlymaPAV0318 | 2 | 2  | 6  | IPR019557; Aminotransferase-like, plant mobile domain                                       |
| GlymaPAV0319 | 1 | 2  | 0  |                                                                                             |
| GlymaPAV0320 | 3 | 2  | 1  |                                                                                             |
| GlymaPAV0321 | 2 | 1  | 0  |                                                                                             |
| GlymaPAV0322 | 2 | 1  | 0  |                                                                                             |
| GlymaPAV0323 | 1 | 0  | 2  |                                                                                             |
| GlymaPAV0324 | 0 | 2  | 0  |                                                                                             |
| GlymaPAV0325 | 2 | 7  | 13 |                                                                                             |
| GlymaPAV0326 | 0 | 0  | 5  |                                                                                             |
| GlymaPAV0327 | 2 | 3  | 6  |                                                                                             |
| GlymaPAV0328 | 1 | 0  | 2  |                                                                                             |
| GlymaPAV0329 | 5 | 4  | 1  |                                                                                             |
| GlymaPAV0330 | 0 | 0  | 2  |                                                                                             |
| GlymaPAV0331 | 1 | 0  | 1  |                                                                                             |
| GlymaPAV0332 | 2 | 8  | 4  |                                                                                             |
| GlymaPAV0333 | 1 | 1  | 0  |                                                                                             |
| GlymaPAV0334 | 0 | 1  | 2  |                                                                                             |
| GlymaPAV0335 | 0 | 0  | 1  |                                                                                             |
| GlymaPAV0336 | 1 | 2  | 0  | IPR002100; Transcription factor, MADS-box                                                   |
| GlymaPAV0337 | 1 | 0  | 0  |                                                                                             |
| GlymaPAV0338 | 3 | 3  | 2  |                                                                                             |
| GlymaPAV0339 | 1 | 0  | 0  |                                                                                             |
| GlymaPAV0340 | 0 | 4  | 0  |                                                                                             |

|              |   |    |    |                                                                |
|--------------|---|----|----|----------------------------------------------------------------|
| GlymaPAV0341 | 1 | 0  | 1  |                                                                |
| GlymaPAV0342 | 4 | 0  | 0  |                                                                |
| GlymaPAV0343 | 0 | 4  | 2  |                                                                |
| GlymaPAV0344 | 4 | 2  | 0  |                                                                |
| GlymaPAV0345 | 1 | 10 | 4  |                                                                |
| GlymaPAV0346 | 2 | 0  | 1  |                                                                |
| GlymaPAV0347 | 1 | 2  | 8  | IPR000477; Reverse transcriptase                               |
| GlymaPAV0348 | 0 | 2  | 0  |                                                                |
| GlymaPAV0349 | 0 | 0  | 1  |                                                                |
| GlymaPAV0350 | 1 | 2  | 15 |                                                                |
| GlymaPAV0351 | 5 | 20 | 4  |                                                                |
| GlymaPAV0352 | 0 | 4  | 9  |                                                                |
| GlymaPAV0353 | 4 | 0  | 1  |                                                                |
| GlymaPAV0354 | 3 | 3  | 0  |                                                                |
| GlymaPAV0355 | 0 | 2  | 0  |                                                                |
| GlymaPAV0356 | 1 | 3  | 2  |                                                                |
| GlymaPAV0357 | 1 | 8  | 4  |                                                                |
| GlymaPAV0358 | 2 | 0  | 1  |                                                                |
| GlymaPAV0359 | 1 | 0  | 6  |                                                                |
| GlymaPAV0360 | 1 | 4  | 3  |                                                                |
| GlymaPAV0361 | 3 | 1  | 0  |                                                                |
| GlymaPAV0362 | 2 | 0  | 0  |                                                                |
| GlymaPAV0363 | 0 | 11 | 2  |                                                                |
| GlymaPAV0364 | 3 | 2  | 11 |                                                                |
| GlymaPAV0365 | 0 | 1  | 0  |                                                                |
| GlymaPAV0366 | 5 | 6  | 0  |                                                                |
| GlymaPAV0367 | 0 | 2  | 1  |                                                                |
| GlymaPAV0368 | 0 | 12 | 4  |                                                                |
| GlymaPAV0369 | 1 | 1  | 9  |                                                                |
| GlymaPAV0370 | 3 | 2  | 9  | IPR000953; Chromo domain                                       |
| GlymaPAV0371 | 0 | 3  | 0  |                                                                |
| GlymaPAV0372 | 2 | 4  | 1  |                                                                |
| GlymaPAV0373 | 1 | 11 | 0  |                                                                |
| GlymaPAV0374 | 5 | 7  | 5  |                                                                |
| GlymaPAV0375 | 0 | 0  | 2  |                                                                |
| GlymaPAV0376 | 2 | 0  | 0  |                                                                |
| GlymaPAV0377 | 0 | 3  | 0  | IPR000953; Chromo domain                                       |
| GlymaPAV0378 | 6 | 10 | 14 |                                                                |
| GlymaPAV0379 | 1 | 0  | 0  |                                                                |
| GlymaPAV0380 | 5 | 5  | 28 | IPR000953; Chromo domain                                       |
| GlymaPAV0381 | 1 | 4  | 2  |                                                                |
| GlymaPAV0382 | 1 | 0  | 0  |                                                                |
| GlymaPAV0383 | 0 | 2  | 1  |                                                                |
| GlymaPAV0384 | 5 | 2  | 9  |                                                                |
| GlymaPAV0385 | 2 | 5  | 7  |                                                                |
| GlymaPAV0386 | 0 | 1  | 1  | IPR005135; Endonuclease/exonuclease/phosphatase                |
| GlymaPAV0387 | 1 | 2  | 2  | IPR015706; RNA-directed DNA polymerase (reverse transcriptase) |
| GlymaPAV0388 | 1 | 1  | 2  |                                                                |
| GlymaPAV0389 | 2 | 0  | 1  |                                                                |
| GlymaPAV0390 | 2 | 1  | 6  |                                                                |
| GlymaPAV0391 | 2 | 20 | 10 |                                                                |
| GlymaPAV0392 | 2 | 0  | 1  |                                                                |
| GlymaPAV0393 | 0 | 1  | 0  |                                                                |
| GlymaPAV0394 | 3 | 0  | 0  |                                                                |
| GlymaPAV0395 | 0 | 0  | 2  | IPR001878; Zinc finger, CCHC-type                              |
| GlymaPAV0396 | 1 | 4  | 9  | IPR018150; Aminoacyl-tRNA synthetase, class II (D/K/N)-like    |
| GlymaPAV0397 | 0 | 1  | 2  |                                                                |
| GlymaPAV0398 | 2 | 2  | 8  |                                                                |

|              |   |    |    |                                                                |
|--------------|---|----|----|----------------------------------------------------------------|
| GlymaPAV0399 | 0 | 0  | 6  |                                                                |
| GlymaPAV0400 | 2 | 0  | 0  |                                                                |
| GlymaPAV0401 | 0 | 6  | 16 |                                                                |
| GlymaPAV0402 | 7 | 22 | 20 |                                                                |
| GlymaPAV0403 | 2 | 1  | 2  |                                                                |
| GlymaPAV0404 | 1 | 0  | 0  |                                                                |
| GlymaPAV0405 | 0 | 1  | 0  |                                                                |
| GlymaPAV0406 | 4 | 1  | 1  |                                                                |
| GlymaPAV0407 | 0 | 1  | 2  |                                                                |
| GlymaPAV0408 | 3 | 5  | 3  | IPR013242; Retroviral aspartyl protease                        |
| GlymaPAV0409 | 3 | 0  | 3  |                                                                |
| GlymaPAV0410 | 0 | 2  | 0  |                                                                |
| GlymaPAV0411 | 2 | 1  | 0  |                                                                |
| GlymaPAV0412 | 2 | 0  | 0  |                                                                |
| GlymaPAV0413 | 2 | 2  | 1  |                                                                |
| GlymaPAV0414 | 2 | 3  | 7  |                                                                |
| GlymaPAV0415 | 0 | 0  | 1  |                                                                |
| GlymaPAV0416 | 4 | 0  | 0  |                                                                |
| GlymaPAV0417 | 4 | 0  | 0  |                                                                |
| GlymaPAV0418 | 1 | 10 | 1  |                                                                |
| GlymaPAV0419 | 1 | 1  | 0  |                                                                |
| GlymaPAV0420 | 1 | 0  | 0  |                                                                |
| GlymaPAV0421 | 0 | 0  | 1  |                                                                |
| GlymaPAV0422 | 0 | 0  | 8  |                                                                |
| GlymaPAV0423 | 0 | 2  | 1  |                                                                |
| GlymaPAV0424 | 1 | 0  | 0  |                                                                |
| GlymaPAV0425 | 3 | 3  | 4  |                                                                |
| GlymaPAV0426 | 9 | 3  | 1  | IPR015706; RNA-directed DNA polymerase (reverse transcriptase) |
| GlymaPAV0427 | 1 | 5  | 0  |                                                                |
| GlymaPAV0428 | 6 | 2  | 1  |                                                                |
| GlymaPAV0429 | 3 | 1  | 2  |                                                                |
| GlymaPAV0430 | 0 | 1  | 8  |                                                                |
| GlymaPAV0431 | 2 | 1  | 5  |                                                                |
| GlymaPAV0432 | 0 | 6  | 3  |                                                                |
| GlymaPAV0433 | 1 | 2  | 4  |                                                                |
| GlymaPAV0434 | 2 | 2  | 2  | IPR019557; Aminotransferase-like, plant mobile domain          |
| GlymaPAV0435 | 0 | 1  | 0  |                                                                |
| GlymaPAV0436 | 5 | 13 | 12 |                                                                |
| GlymaPAV0437 | 8 | 15 | 8  |                                                                |
| GlymaPAV0438 | 2 | 1  | 0  |                                                                |
| GlymaPAV0439 | 1 | 0  | 0  |                                                                |
| GlymaPAV0440 | 0 | 6  | 0  |                                                                |
| GlymaPAV0441 | 0 | 3  | 8  |                                                                |
| GlymaPAV0442 | 2 | 2  | 0  |                                                                |
| GlymaPAV0443 | 0 | 0  | 1  |                                                                |
| GlymaPAV0444 | 2 | 1  | 3  |                                                                |
| GlymaPAV0445 | 1 | 1  | 3  |                                                                |
| GlymaPAV0446 | 6 | 2  | 1  |                                                                |
| GlymaPAV0447 | 1 | 9  | 1  |                                                                |
| GlymaPAV0448 | 2 | 6  | 12 |                                                                |
| GlymaPAV0449 | 1 | 2  | 1  |                                                                |
| GlymaPAV0450 | 0 | 0  | 1  | IPR013242; Retroviral aspartyl protease                        |
| GlymaPAV0451 | 1 | 1  | 5  |                                                                |
| GlymaPAV0452 | 6 | 2  | 1  |                                                                |
| GlymaPAV0453 | 4 | 0  | 1  |                                                                |
| GlymaPAV0454 | 0 | 0  | 1  |                                                                |
| GlymaPAV0455 | 2 | 2  | 0  | IPR018061; Peptidase A2A, retrovirus RVP subgroup              |
| GlymaPAV0456 | 1 | 12 | 3  |                                                                |



|              |   |    |    |                                                                                                     |
|--------------|---|----|----|-----------------------------------------------------------------------------------------------------|
| GlymaPAV0457 | 2 | 4  | 2  | IPR005162; Retrotransposon gag protein                                                              |
| GlymaPAV0458 | 1 | 3  | 5  |                                                                                                     |
| GlymaPAV0459 | 2 | 1  | 0  |                                                                                                     |
| GlymaPAV0460 | 1 | 4  | 0  |                                                                                                     |
| GlymaPAV0461 | 0 | 3  | 1  |                                                                                                     |
| GlymaPAV0462 | 3 | 0  | 1  |                                                                                                     |
| GlymaPAV0463 | 1 | 0  | 1  |                                                                                                     |
| GlymaPAV0464 | 5 | 12 | 1  |                                                                                                     |
| GlymaPAV0465 | 2 | 0  | 0  |                                                                                                     |
| GlymaPAV0466 | 1 | 0  | 0  |                                                                                                     |
| GlymaPAV0467 | 1 | 7  | 0  |                                                                                                     |
| GlymaPAV0468 | 3 | 2  | 0  |                                                                                                     |
| GlymaPAV0469 | 0 | 1  | 2  |                                                                                                     |
| GlymaPAV0470 | 1 | 1  | 9  |                                                                                                     |
| GlymaPAV0471 | 2 | 2  | 4  |                                                                                                     |
| GlymaPAV0472 | 0 | 2  | 1  |                                                                                                     |
| GlymaPAV0473 | 0 | 0  | 3  |                                                                                                     |
| GlymaPAV0474 | 0 | 3  | 0  |                                                                                                     |
| GlymaPAV0475 | 6 | 3  | 6  |                                                                                                     |
| GlymaPAV0476 | 1 | 0  | 0  |                                                                                                     |
| GlymaPAV0477 | 2 | 2  | 0  |                                                                                                     |
| GlymaPAV0478 | 0 | 1  | 7  |                                                                                                     |
| GlymaPAV0479 | 2 | 0  | 0  |                                                                                                     |
| GlymaPAV0480 | 0 | 2  | 0  |                                                                                                     |
| GlymaPAV0481 | 1 | 0  | 7  |                                                                                                     |
| GlymaPAV0482 | 6 | 5  | 0  |                                                                                                     |
| GlymaPAV0483 | 5 | 3  | 3  | IPR002156; Ribonuclease H domain                                                                    |
| GlymaPAV0484 | 2 | 0  | 0  |                                                                                                     |
| GlymaPAV0485 | 0 | 2  | 2  |                                                                                                     |
| GlymaPAV0486 | 0 | 0  | 2  |                                                                                                     |
| GlymaPAV0487 | 1 | 0  | 0  |                                                                                                     |
| GlymaPAV0488 | 1 | 0  | 0  |                                                                                                     |
| GlymaPAV0489 | 0 | 1  | 1  | IPR005162; Retrotransposon gag protein                                                              |
| GlymaPAV0490 | 0 | 6  | 1  |                                                                                                     |
| GlymaPAV0491 | 0 | 5  | 2  |                                                                                                     |
| GlymaPAV0492 | 2 | 0  | 12 |                                                                                                     |
| GlymaPAV0493 | 7 | 1  | 10 |                                                                                                     |
| GlymaPAV0494 | 0 | 2  | 0  |                                                                                                     |
| GlymaPAV0495 | 0 | 3  | 0  |                                                                                                     |
| GlymaPAV0496 | 4 | 0  | 0  | IPR019557; Aminotransferase-like, plant mobile domain                                               |
| GlymaPAV0497 | 0 | 6  | 0  |                                                                                                     |
| GlymaPAV0498 | 2 | 3  | 0  |                                                                                                     |
| GlymaPAV0499 | 0 | 1  | 2  |                                                                                                     |
| GlymaPAV0500 | 6 | 7  | 21 | IPR013242; Retroviral aspartyl protease IPR018150; Aminoacyl-tRNA synthetase, class II (D/K/N)-like |
| GlymaPAV0501 | 2 | 3  | 6  |                                                                                                     |
| GlymaPAV0502 | 0 | 2  | 1  | IPR018150; Aminoacyl-tRNA synthetase, class II (D/K/N)-like                                         |
| GlymaPAV0503 | 2 | 3  | 1  |                                                                                                     |
| GlymaPAV0504 | 1 | 7  | 0  |                                                                                                     |
| GlymaPAV0505 | 5 | 0  | 0  |                                                                                                     |
| GlymaPAV0506 | 8 | 5  | 6  | IPR019103; Peptidase aspartic, eukaryotic predicted                                                 |
| GlymaPAV0507 | 1 | 3  | 0  | IPR015416; Zinc finger, H2C2-type, histone UAS binding                                              |
| GlymaPAV0508 | 4 | 4  | 9  |                                                                                                     |
| GlymaPAV0509 | 5 | 0  | 7  | IPR015706; RNA-directed DNA polymerase (reverse transcriptase)                                      |
| GlymaPAV0510 | 2 | 11 | 5  |                                                                                                     |
| GlymaPAV0511 | 2 | 2  | 3  |                                                                                                     |
| GlymaPAV0512 | 3 | 1  | 1  |                                                                                                     |
| GlymaPAV0513 | 0 | 0  | 1  |                                                                                                     |
| GlymaPAV0514 | 1 | 4  | 0  |                                                                                                     |

|              |    |    |    |                                                                                                   |
|--------------|----|----|----|---------------------------------------------------------------------------------------------------|
| GlymaPAV0515 | 5  | 4  | 1  |                                                                                                   |
| GlymaPAV0516 | 1  | 1  | 0  |                                                                                                   |
| GlymaPAV0517 | 2  | 7  | 1  |                                                                                                   |
| GlymaPAV0518 | 2  | 0  | 1  |                                                                                                   |
| GlymaPAV0519 | 0  | 2  | 10 |                                                                                                   |
| GlymaPAV0520 | 6  | 3  | 2  | IPR000477; Reverse transcriptase                                                                  |
| GlymaPAV0521 | 3  | 3  | 2  | IPR005162; Retrotransposon gag protein                                                            |
| GlymaPAV0522 | 2  | 4  | 2  |                                                                                                   |
| GlymaPAV0523 | 3  | 5  | 0  |                                                                                                   |
| GlymaPAV0524 | 1  | 5  | 3  |                                                                                                   |
| GlymaPAV0525 | 2  | 3  | 4  |                                                                                                   |
| GlymaPAV0526 | 0  | 1  | 0  |                                                                                                   |
| GlymaPAV0527 | 1  | 0  | 0  |                                                                                                   |
| GlymaPAV0528 | 0  | 1  | 6  |                                                                                                   |
| GlymaPAV0529 | 2  | 0  | 1  |                                                                                                   |
| GlymaPAV0530 | 5  | 0  | 6  |                                                                                                   |
| GlymaPAV0531 | 1  | 0  | 0  |                                                                                                   |
| GlymaPAV0532 | 10 | 5  | 10 |                                                                                                   |
| GlymaPAV0533 | 1  | 0  | 0  |                                                                                                   |
| GlymaPAV0534 | 1  | 2  | 2  |                                                                                                   |
| GlymaPAV0535 | 0  | 0  | 1  |                                                                                                   |
| GlymaPAV0536 | 1  | 3  | 0  |                                                                                                   |
| GlymaPAV0537 | 2  | 0  | 1  |                                                                                                   |
| GlymaPAV0538 | 2  | 5  | 0  |                                                                                                   |
| GlymaPAV0539 | 1  | 1  | 5  |                                                                                                   |
| GlymaPAV0540 | 1  | 1  | 0  |                                                                                                   |
| GlymaPAV0541 | 5  | 1  | 4  |                                                                                                   |
| GlymaPAV0542 | 4  | 7  | 4  | IPR001878; Zinc finger, CCHC-type IPR013242; Retroviral aspartyl protease                         |
| GlymaPAV0543 | 1  | 1  | 1  |                                                                                                   |
| GlymaPAV0544 | 2  | 1  | 8  |                                                                                                   |
| GlymaPAV0545 | 0  | 1  | 1  |                                                                                                   |
| GlymaPAV0546 | 1  | 7  | 0  |                                                                                                   |
| GlymaPAV0547 | 3  | 3  | 0  |                                                                                                   |
| GlymaPAV0548 | 0  | 14 | 3  | IPR015706; RNA-directed DNA polymerase (reverse transcriptase)                                    |
| GlymaPAV0549 | 1  | 0  | 1  |                                                                                                   |
| GlymaPAV0550 | 0  | 1  | 0  |                                                                                                   |
| GlymaPAV0551 | 3  | 4  | 0  | IPR015416; Zinc finger, H2C2-type, histone UAS binding                                            |
| GlymaPAV0552 | 0  | 3  | 4  |                                                                                                   |
| GlymaPAV0553 | 0  | 0  | 4  | IPR001878; Zinc finger, CCHC-type                                                                 |
| GlymaPAV0554 | 1  | 5  | 5  |                                                                                                   |
| GlymaPAV0555 | 1  | 0  | 6  |                                                                                                   |
| GlymaPAV0556 | 1  | 0  | 0  | IPR015706; RNA-directed DNA polymerase (reverse transcriptase)                                    |
| GlymaPAV0557 | 2  | 4  | 0  |                                                                                                   |
| GlymaPAV0558 | 0  | 0  | 1  |                                                                                                   |
| GlymaPAV0559 | 2  | 4  | 2  |                                                                                                   |
| GlymaPAV0560 | 0  | 0  | 1  | IPR001750; NADH:ubiquinone/plastoquinone oxidoreductase IPR003918; NADH:ubiquinone oxidoreductase |
| GlymaPAV0561 | 0  | 2  | 0  |                                                                                                   |
| GlymaPAV0562 | 0  | 1  | 0  |                                                                                                   |
| GlymaPAV0563 | 0  | 0  | 1  |                                                                                                   |
| GlymaPAV0564 | 1  | 0  | 1  |                                                                                                   |
| GlymaPAV0565 | 0  | 2  | 1  |                                                                                                   |
| GlymaPAV0566 | 0  | 2  | 0  |                                                                                                   |
| GlymaPAV0567 | 7  | 0  | 0  |                                                                                                   |
| GlymaPAV0568 | 1  | 3  | 1  |                                                                                                   |
| GlymaPAV0569 | 1  | 1  | 4  |                                                                                                   |
| GlymaPAV0570 | 1  | 0  | 0  |                                                                                                   |
| GlymaPAV0571 | 0  | 2  | 1  |                                                                                                   |
| GlymaPAV0572 | 0  | 1  | 4  |                                                                                                   |

|              |   |    |    |                                                                                                 |
|--------------|---|----|----|-------------------------------------------------------------------------------------------------|
| GlymaPAV0573 | 2 | 0  | 0  |                                                                                                 |
| GlymaPAV0574 | 0 | 0  | 1  |                                                                                                 |
| GlymaPAV0575 | 3 | 2  | 1  |                                                                                                 |
| GlymaPAV0576 | 1 | 8  | 1  | IPR013103; Reverse transcriptase, RNA-dependent DNA polymerase                                  |
| GlymaPAV0577 | 0 | 4  | 0  |                                                                                                 |
| GlymaPAV0578 | 0 | 1  | 16 |                                                                                                 |
| GlymaPAV0579 | 0 | 6  | 2  | IPR001584; Integrase, catalytic core                                                            |
| GlymaPAV0580 | 2 | 1  | 0  |                                                                                                 |
| GlymaPAV0581 | 0 | 0  | 1  |                                                                                                 |
| GlymaPAV0582 | 6 | 7  | 1  | IPR005162; Retrotransposon gag protein                                                          |
| GlymaPAV0583 | 1 | 4  | 0  |                                                                                                 |
| GlymaPAV0584 | 0 | 2  | 4  |                                                                                                 |
| GlymaPAV0585 | 2 | 1  | 11 |                                                                                                 |
| GlymaPAV0586 | 0 | 3  | 3  | IPR000477; Reverse transcriptase IPR015706; RNA-directed DNA polymerase (reverse transcriptase) |
| GlymaPAV0587 | 1 | 0  | 3  |                                                                                                 |
| GlymaPAV0588 | 2 | 1  | 0  |                                                                                                 |
| GlymaPAV0589 | 0 | 1  | 2  | IPR000477; Reverse transcriptase IPR015706; RNA-directed DNA polymerase (reverse transcriptase) |
| GlymaPAV0590 | 0 | 0  | 2  |                                                                                                 |
| GlymaPAV0591 | 1 | 0  | 0  | IPR018289; MULE transposase, conserved domain                                                   |
| GlymaPAV0592 | 0 | 0  | 6  | IPR013103; Reverse transcriptase, RNA-dependent DNA polymerase                                  |
| GlymaPAV0593 | 0 | 1  | 0  | IPR005481; Carbamoyl-phosphate synthase, large subunit, N-terminal                              |
| GlymaPAV0594 | 1 | 3  | 0  |                                                                                                 |
| GlymaPAV0595 | 2 | 0  | 0  | IPR001611; Leucine-rich repeat                                                                  |
| GlymaPAV0596 | 1 | 15 | 1  |                                                                                                 |
| GlymaPAV0597 | 4 | 10 | 23 | IPR001584; Integrase, catalytic core                                                            |
| GlymaPAV0598 | 4 | 3  | 11 | IPR013242; Retroviral aspartyl protease                                                         |
| GlymaPAV0599 | 2 | 0  | 0  | IPR004242; Transposon, En/Spm-like                                                              |
| GlymaPAV0600 | 4 | 14 | 17 | IPR000477; Reverse transcriptase                                                                |
| GlymaPAV0601 | 1 | 15 | 5  | IPR000477; Reverse transcriptase                                                                |
| GlymaPAV0602 | 0 | 1  | 0  | IPR001789; Signal transduction response regulator, receiver domain                              |
| GlymaPAV0603 | 0 | 0  | 1  | IPR001584; Integrase, catalytic core                                                            |
| GlymaPAV0604 | 0 | 1  | 0  | IPR001123; Lysine exporter protein (LYSE/YGGA)                                                  |
| GlymaPAV0605 | 0 | 1  | 0  | IPR001750; NADH:ubiquinone/plastoquinone oxidoreductase                                         |
| GlymaPAV0606 | 0 | 0  | 7  |                                                                                                 |
| GlymaPAV0607 | 0 | 1  | 0  |                                                                                                 |
| GlymaPAV0608 | 2 | 2  | 2  | IPR004114; THUMP IPR020536; Thiamine biosynthesis protein, C-terminal                           |
| GlymaPAV0609 | 0 | 0  | 4  | IPR000298; Cytochrome c oxidase, subunit III                                                    |
| GlymaPAV0610 | 2 | 0  | 0  |                                                                                                 |
| GlymaPAV0611 | 0 | 1  | 0  |                                                                                                 |
| GlymaPAV0612 | 7 | 18 | 14 | IPR005162; Retrotransposon gag protein                                                          |
| GlymaPAV0613 | 4 | 6  | 1  |                                                                                                 |
| GlymaPAV0614 | 2 | 2  | 2  | IPR001750; NADH:ubiquinone/plastoquinone oxidoreductase                                         |
| GlymaPAV0615 | 2 | 0  | 3  |                                                                                                 |
| GlymaPAV0616 | 1 | 4  | 5  |                                                                                                 |
| GlymaPAV0617 | 1 | 7  | 0  | IPR007021; Domain of unknown function DUF659                                                    |
| GlymaPAV0618 | 1 | 0  | 1  | IPR013103; Reverse transcriptase, RNA-dependent DNA polymerase                                  |
| GlymaPAV0619 | 3 | 17 | 40 |                                                                                                 |
| GlymaPAV0620 | 3 | 0  | 0  | IPR001584; Integrase, catalytic core                                                            |
| GlymaPAV0621 | 6 | 15 | 2  | IPR001584; Integrase, catalytic core                                                            |
| GlymaPAV0622 | 3 | 0  | 0  | IPR005162; Retrotransposon gag protein                                                          |
| GlymaPAV0623 | 5 | 0  | 0  | IPR013103; Reverse transcriptase, RNA-dependent DNA polymerase                                  |
| GlymaPAV0624 | 1 | 0  | 0  |                                                                                                 |
| GlymaPAV0625 | 8 | 12 | 30 | IPR001584; Integrase, catalytic core                                                            |
| GlymaPAV0626 | 0 | 0  | 1  | IPR000477; Reverse transcriptase IPR015706; RNA-directed DNA polymerase (reverse transcriptase) |
| GlymaPAV0627 | 1 | 6  | 1  | IPR001584; Integrase, catalytic core                                                            |
| GlymaPAV0628 | 0 | 8  | 1  | IPR004000; Actin-like IPR015623; Actin-related protein 3                                        |
| GlymaPAV0629 | 1 | 1  | 1  |                                                                                                 |
| GlymaPAV0630 | 0 | 2  | 3  | IPR004242; Transposon, En/Spm-like                                                              |

|              |    |    |    |                                                                                                                                                                                                      |
|--------------|----|----|----|------------------------------------------------------------------------------------------------------------------------------------------------------------------------------------------------------|
| GlymaPAV0631 | 1  | 0  | 2  |                                                                                                                                                                                                      |
| GlymaPAV0632 | 4  | 1  | 0  |                                                                                                                                                                                                      |
| GlymaPAV0633 | 2  | 1  | 1  |                                                                                                                                                                                                      |
| GlymaPAV0634 | 0  | 0  | 1  | IPR013103; Reverse transcriptase, RNA-dependent DNA polymerase                                                                                                                                       |
| GlymaPAV0635 | 1  | 2  | 0  | IPR000477; Reverse transcriptase IPR015706; RNA-directed DNA polymerase (reverse transcriptase)                                                                                                      |
| GlymaPAV0636 | 0  | 4  | 0  | IPR004242; Transposon, En/Spm-like                                                                                                                                                                   |
| GlymaPAV0637 | 0  | 2  | 9  | IPR000477; Reverse transcriptase IPR015706; RNA-directed DNA polymerase (reverse transcriptase)                                                                                                      |
| GlymaPAV0638 | 1  | 4  | 0  | IPR000477; Reverse transcriptase                                                                                                                                                                     |
| GlymaPAV0639 | 4  | 4  | 5  | IPR001584; Integrase, catalytic core                                                                                                                                                                 |
| GlymaPAV0640 | 2  | 4  | 15 |                                                                                                                                                                                                      |
| GlymaPAV0641 | 2  | 0  | 0  |                                                                                                                                                                                                      |
| GlymaPAV0642 | 3  | 12 | 20 |                                                                                                                                                                                                      |
| GlymaPAV0643 | 4  | 2  | 4  | IPR000477; Reverse transcriptase                                                                                                                                                                     |
| GlymaPAV0644 | 0  | 0  | 5  |                                                                                                                                                                                                      |
| GlymaPAV0645 | 2  | 0  | 1  | IPR005135; Endonuclease/exonuclease/phosphatase IPR015706; RNA-directed DNA polymerase (reverse transcriptase)                                                                                       |
| GlymaPAV0646 | 10 | 40 | 56 |                                                                                                                                                                                                      |
| GlymaPAV0647 | 1  | 0  | 0  |                                                                                                                                                                                                      |
| GlymaPAV0648 | 5  | 19 | 7  |                                                                                                                                                                                                      |
| GlymaPAV0649 | 6  | 3  | 2  |                                                                                                                                                                                                      |
| GlymaPAV0650 | 0  | 0  | 4  | IPR000477; Reverse transcriptase IPR015706; RNA-directed DNA polymerase (reverse transcriptase)                                                                                                      |
| GlymaPAV0651 | 1  | 0  | 0  | IPR005135; Endonuclease/exonuclease/phosphatase IPR015706; RNA-directed DNA polymerase (reverse transcriptase)                                                                                       |
| GlymaPAV0652 | 4  | 1  | 4  |                                                                                                                                                                                                      |
| GlymaPAV0653 | 0  | 1  | 0  | IPR001623; Heat shock protein DnaJ, N-terminal IPR003095; Heat shock protein DnaJ IPR015609; Molecular chaperone, heat shock protein, Hsp40, DnaJ IPR018253; Heat shock protein DnaJ, conserved site |
| GlymaPAV0654 | 0  | 3  | 1  | IPR001584; Integrase, catalytic core                                                                                                                                                                 |
| GlymaPAV0655 | 0  | 1  | 2  | IPR001584; Integrase, catalytic core                                                                                                                                                                 |
| GlymaPAV0656 | 0  | 1  | 2  |                                                                                                                                                                                                      |
| GlymaPAV0657 | 2  | 6  | 5  | IPR019557; Aminotransferase-like, plant mobile domain                                                                                                                                                |
| GlymaPAV0658 | 2  | 11 | 11 | IPR000477; Reverse transcriptase                                                                                                                                                                     |
| GlymaPAV0659 | 3  | 1  | 1  |                                                                                                                                                                                                      |
| GlymaPAV0660 | 3  | 12 | 4  | IPR001584; Integrase, catalytic core                                                                                                                                                                 |
| GlymaPAV0661 | 3  | 4  | 3  | IPR001611; Leucine-rich repeat IPR003591; Leucine-rich repeat, typical subtype                                                                                                                       |
| GlymaPAV0662 | 0  | 1  | 0  |                                                                                                                                                                                                      |
| GlymaPAV0663 | 0  | 9  | 0  |                                                                                                                                                                                                      |
| GlymaPAV0664 | 4  | 1  | 13 | IPR000767; Disease resistance protein IPR001611; Leucine-rich repeat IPR002182; NB-ARC                                                                                                               |
| GlymaPAV0665 | 2  | 5  | 5  |                                                                                                                                                                                                      |
| GlymaPAV0666 | 5  | 2  | 5  |                                                                                                                                                                                                      |
| GlymaPAV0667 | 0  | 0  | 2  |                                                                                                                                                                                                      |
| GlymaPAV0668 | 0  | 0  | 1  |                                                                                                                                                                                                      |
| GlymaPAV0669 | 0  | 1  | 3  |                                                                                                                                                                                                      |
| GlymaPAV0670 | 3  | 6  | 10 | IPR000453; Chorismate synthase                                                                                                                                                                       |
| GlymaPAV0671 | 0  | 1  | 0  |                                                                                                                                                                                                      |
| GlymaPAV0672 | 1  | 0  | 0  | IPR013955; Replication factor A, C-terminal                                                                                                                                                          |
| GlymaPAV0673 | 1  | 1  | 1  |                                                                                                                                                                                                      |
| GlymaPAV0674 | 0  | 5  | 0  |                                                                                                                                                                                                      |
| GlymaPAV0675 | 2  | 1  | 0  |                                                                                                                                                                                                      |
| GlymaPAV0676 | 2  | 0  | 4  |                                                                                                                                                                                                      |
| GlymaPAV0677 | 1  | 0  | 0  |                                                                                                                                                                                                      |
| GlymaPAV0678 | 1  | 0  | 0  |                                                                                                                                                                                                      |
| GlymaPAV0679 | 0  | 0  | 1  |                                                                                                                                                                                                      |
| GlymaPAV0680 | 0  | 1  | 0  |                                                                                                                                                                                                      |
| GlymaPAV0681 | 0  | 0  | 1  |                                                                                                                                                                                                      |
| GlymaPAV0682 | 2  | 6  | 3  |                                                                                                                                                                                                      |
| GlymaPAV0683 | 0  | 2  | 0  | IPR003323; Ovarian tumour, otubain                                                                                                                                                                   |
| GlymaPAV0684 | 0  | 3  | 5  |                                                                                                                                                                                                      |
| GlymaPAV0685 | 0  | 1  | 0  |                                                                                                                                                                                                      |

|              |   |    |    |                                                                                                                                                                                                                                                 |
|--------------|---|----|----|-------------------------------------------------------------------------------------------------------------------------------------------------------------------------------------------------------------------------------------------------|
| GlymaPAV0686 | 4 | 16 | 19 |                                                                                                                                                                                                                                                 |
| GlymaPAV0687 | 1 | 0  | 3  | IPR003871; Domain of unknown function DUF223                                                                                                                                                                                                    |
| GlymaPAV0688 | 4 | 6  | 2  |                                                                                                                                                                                                                                                 |
| GlymaPAV0689 | 1 | 0  | 1  | IPR015706; RNA-directed DNA polymerase (reverse transcriptase)                                                                                                                                                                                  |
| GlymaPAV0690 | 1 | 1  | 0  | IPR003323; Ovarian tumour, otubain                                                                                                                                                                                                              |
| GlymaPAV0691 | 1 | 0  | 4  | IPR015706; RNA-directed DNA polymerase (reverse transcriptase)                                                                                                                                                                                  |
| GlymaPAV0692 | 0 | 1  | 4  |                                                                                                                                                                                                                                                 |
| GlymaPAV0693 | 1 | 1  | 3  |                                                                                                                                                                                                                                                 |
| GlymaPAV0694 | 1 | 2  | 0  |                                                                                                                                                                                                                                                 |
| GlymaPAV0695 | 0 | 1  | 3  |                                                                                                                                                                                                                                                 |
| GlymaPAV0696 | 1 | 3  | 4  |                                                                                                                                                                                                                                                 |
| GlymaPAV0697 | 1 | 3  | 12 |                                                                                                                                                                                                                                                 |
| GlymaPAV0698 | 1 | 0  | 1  |                                                                                                                                                                                                                                                 |
| GlymaPAV0699 | 0 | 3  | 10 | IPR005162; Retrotransposon gag protein                                                                                                                                                                                                          |
| GlymaPAV0700 | 1 | 3  | 7  |                                                                                                                                                                                                                                                 |
| GlymaPAV0701 | 1 | 0  | 0  |                                                                                                                                                                                                                                                 |
| GlymaPAV0702 | 1 | 0  | 0  | IPR015706; RNA-directed DNA polymerase (reverse transcriptase)                                                                                                                                                                                  |
| GlymaPAV0703 | 4 | 9  | 8  |                                                                                                                                                                                                                                                 |
| GlymaPAV0704 | 5 | 0  | 0  |                                                                                                                                                                                                                                                 |
| GlymaPAV0705 | 2 | 0  | 0  | IPR001480; Bulb-type lectin domain                                                                                                                                                                                                              |
| GlymaPAV0706 | 4 | 1  | 8  |                                                                                                                                                                                                                                                 |
| GlymaPAV0707 | 2 | 1  | 0  |                                                                                                                                                                                                                                                 |
| GlymaPAV0708 | 0 | 0  | 2  | IPR007644; RNA polymerase, beta subunit, protrusion                                                                                                                                                                                             |
| GlymaPAV0709 | 0 | 2  | 0  |                                                                                                                                                                                                                                                 |
| GlymaPAV0710 | 0 | 6  | 0  |                                                                                                                                                                                                                                                 |
| GlymaPAV0711 | 1 | 5  | 2  |                                                                                                                                                                                                                                                 |
| GlymaPAV0712 | 0 | 1  | 1  |                                                                                                                                                                                                                                                 |
| GlymaPAV0713 | 3 | 10 | 0  |                                                                                                                                                                                                                                                 |
| GlymaPAV0714 | 3 | 3  | 0  |                                                                                                                                                                                                                                                 |
| GlymaPAV0715 | 1 | 8  | 9  |                                                                                                                                                                                                                                                 |
| GlymaPAV0716 | 2 | 6  | 4  |                                                                                                                                                                                                                                                 |
| GlymaPAV0717 | 0 | 1  | 0  |                                                                                                                                                                                                                                                 |
| GlymaPAV0718 | 2 | 7  | 7  |                                                                                                                                                                                                                                                 |
| GlymaPAV0719 | 0 | 1  | 2  |                                                                                                                                                                                                                                                 |
| GlymaPAV0720 | 0 | 1  | 0  |                                                                                                                                                                                                                                                 |
| GlymaPAV0721 | 1 | 0  | 2  | IPR004875; DDE superfamily endonuclease, CENP-B-like IPR004906; Pogo transposase / Cnp-B / PDC2, subgroup, DNA-binding HTH domain IPR006600; Pogo transposase / Cnp-B / PDC2, DNA-binding HTH domain IPR003656; Zinc finger, BED-type predicted |
| GlymaPAV0722 | 3 | 0  | 1  |                                                                                                                                                                                                                                                 |
| GlymaPAV0723 | 2 | 0  | 3  |                                                                                                                                                                                                                                                 |
| GlymaPAV0724 | 1 | 7  | 0  |                                                                                                                                                                                                                                                 |
| GlymaPAV0725 | 2 | 2  | 15 |                                                                                                                                                                                                                                                 |
| GlymaPAV0726 | 4 | 0  | 0  |                                                                                                                                                                                                                                                 |
| GlymaPAV0727 | 1 | 2  | 0  |                                                                                                                                                                                                                                                 |
| GlymaPAV0728 | 0 | 3  | 0  |                                                                                                                                                                                                                                                 |
| GlymaPAV0729 | 3 | 0  | 2  |                                                                                                                                                                                                                                                 |
| GlymaPAV0730 | 2 | 0  | 0  | IPR015706; RNA-directed DNA polymerase (reverse transcriptase)                                                                                                                                                                                  |
| GlymaPAV0731 | 4 | 1  | 0  |                                                                                                                                                                                                                                                 |
| GlymaPAV0732 | 0 | 4  | 5  | IPR001878; Zinc finger, CCHC-type IPR005162; Retrotransposon gag protein IPR013242; Retroviral aspartyl protease                                                                                                                                |
| GlymaPAV0733 | 4 | 1  | 0  |                                                                                                                                                                                                                                                 |
| GlymaPAV0734 | 1 | 7  | 5  |                                                                                                                                                                                                                                                 |
| GlymaPAV0735 | 1 | 1  | 2  |                                                                                                                                                                                                                                                 |
| GlymaPAV0736 | 7 | 2  | 1  | IPR005162; Retrotransposon gag protein                                                                                                                                                                                                          |
| GlymaPAV0737 | 1 | 0  | 1  | IPR006912; Putative harbinger transposase-derived nuclease                                                                                                                                                                                      |
| GlymaPAV0738 | 1 | 11 | 0  | IPR004158; Protein of unknown function DUF247, plant                                                                                                                                                                                            |
| GlymaPAV0739 | 1 | 0  | 0  |                                                                                                                                                                                                                                                 |
| GlymaPAV0740 | 0 | 0  | 1  |                                                                                                                                                                                                                                                 |
| GlymaPAV0741 | 2 | 11 | 12 |                                                                                                                                                                                                                                                 |

|              |   |    |    |                                                                                                 |
|--------------|---|----|----|-------------------------------------------------------------------------------------------------|
| GlymaPAV0742 | 1 | 2  | 2  | IPR013148; Glycosyl hydrolases family 32, N-terminal                                            |
| GlymaPAV0743 | 0 | 2  | 2  | IPR005162; Retrotransposon gag protein                                                          |
| GlymaPAV0744 | 5 | 13 | 12 |                                                                                                 |
| GlymaPAV0745 | 0 | 1  | 0  |                                                                                                 |
| GlymaPAV0746 | 0 | 0  | 2  | IPR000814; TATA-box binding protein                                                             |
| GlymaPAV0747 | 4 | 3  | 3  | IPR000477; Reverse transcriptase                                                                |
| GlymaPAV0748 | 0 | 3  | 0  | IPR001878; Zinc finger, CCHC-type                                                               |
| GlymaPAV0749 | 3 | 0  | 0  |                                                                                                 |
| GlymaPAV0750 | 0 | 1  | 0  | IPR005162; Retrotransposon gag protein                                                          |
| GlymaPAV0751 | 2 | 2  | 3  |                                                                                                 |
| GlymaPAV0752 | 0 | 2  | 6  |                                                                                                 |
| GlymaPAV0753 | 1 | 0  | 0  |                                                                                                 |
| GlymaPAV0754 | 0 | 1  | 0  | IPR013103; Reverse transcriptase, RNA-dependent DNA polymerase                                  |
| GlymaPAV0755 | 1 | 0  | 0  |                                                                                                 |
| GlymaPAV0756 | 3 | 10 | 1  | IPR001584; Integrase, catalytic core                                                            |
| GlymaPAV0757 | 6 | 15 | 18 | IPR015706; RNA-directed DNA polymerase (reverse transcriptase)                                  |
| GlymaPAV0758 | 1 | 6  | 4  |                                                                                                 |
| GlymaPAV0759 | 1 | 0  | 0  |                                                                                                 |
| GlymaPAV0760 | 0 | 3  | 1  | IPR005162; Retrotransposon gag protein                                                          |
| GlymaPAV0761 | 0 | 0  | 1  | IPR013103; Reverse transcriptase, RNA-dependent DNA polymerase                                  |
| GlymaPAV0762 | 2 | 1  | 4  |                                                                                                 |
| GlymaPAV0763 | 0 | 3  | 3  | IPR002885; Pentatricopeptide repeat                                                             |
| GlymaPAV0764 | 3 | 6  | 3  | IPR013103; Reverse transcriptase, RNA-dependent DNA polymerase                                  |
| GlymaPAV0765 | 1 | 1  | 1  | IPR000477; Reverse transcriptase                                                                |
| GlymaPAV0766 | 2 | 0  | 0  | IPR015706; RNA-directed DNA polymerase (reverse transcriptase)                                  |
| GlymaPAV0767 | 1 | 19 | 2  |                                                                                                 |
| GlymaPAV0768 | 5 | 14 | 16 | IPR013103; Reverse transcriptase, RNA-dependent DNA polymerase                                  |
| GlymaPAV0769 | 2 | 4  | 3  | IPR000477; Reverse transcriptase                                                                |
| GlymaPAV0770 | 0 | 17 | 1  |                                                                                                 |
| GlymaPAV0771 | 5 | 3  | 23 | IPR002156; Ribonuclease H domain                                                                |
| GlymaPAV0772 | 0 | 1  | 5  | IPR008906; HAT dimerisation                                                                     |
| GlymaPAV0773 | 1 | 12 | 12 | IPR005162; Retrotransposon gag protein                                                          |
| GlymaPAV0774 | 2 | 0  | 2  |                                                                                                 |
| GlymaPAV0775 | 5 | 2  | 0  | IPR013103; Reverse transcriptase, RNA-dependent DNA polymerase                                  |
| GlymaPAV0776 | 0 | 5  | 21 | IPR013103; Reverse transcriptase, RNA-dependent DNA polymerase                                  |
| GlymaPAV0777 | 4 | 36 | 38 | IPR013103; Reverse transcriptase, RNA-dependent DNA polymerase                                  |
| GlymaPAV0778 | 1 | 8  | 4  |                                                                                                 |
| GlymaPAV0779 | 1 | 5  | 0  | IPR005162; Retrotransposon gag protein                                                          |
| GlymaPAV0780 | 0 | 0  | 1  |                                                                                                 |
| GlymaPAV0781 | 5 | 10 | 20 | IPR001584; Integrase, catalytic core IPR015416; Zinc finger, H2C2-type, histone UAS binding     |
| GlymaPAV0782 | 4 | 3  | 4  |                                                                                                 |
| GlymaPAV0783 | 2 | 2  | 2  | IPR000477; Reverse transcriptase IPR015706; RNA-directed DNA polymerase (reverse transcriptase) |
| GlymaPAV0784 | 0 | 1  | 0  |                                                                                                 |
| GlymaPAV0785 | 2 | 2  | 3  | IPR006527; F-box associated domain, type 1                                                      |
| GlymaPAV0786 | 0 | 4  | 0  |                                                                                                 |
| GlymaPAV0787 | 0 | 4  | 5  | IPR000477; Reverse transcriptase IPR015706; RNA-directed DNA polymerase (reverse transcriptase) |
| GlymaPAV0788 | 0 | 1  | 0  |                                                                                                 |
| GlymaPAV0789 | 8 | 16 | 8  | IPR000477; Reverse transcriptase IPR013242; Retroviral aspartyl protease                        |
| GlymaPAV0790 | 1 | 0  | 4  |                                                                                                 |
| GlymaPAV0791 | 3 | 0  | 0  | IPR015706; RNA-directed DNA polymerase (reverse transcriptase)                                  |
| GlymaPAV0792 | 1 | 1  | 0  |                                                                                                 |
| GlymaPAV0793 | 0 | 1  | 2  |                                                                                                 |
| GlymaPAV0794 | 3 | 2  | 6  | IPR000477; Reverse transcriptase                                                                |
| GlymaPAV0795 | 0 | 13 | 13 |                                                                                                 |
| GlymaPAV0796 | 0 | 0  | 1  |                                                                                                 |
| GlymaPAV0797 | 0 | 0  | 1  |                                                                                                 |
| GlymaPAV0798 | 0 | 1  | 1  | IPR001584; Integrase, catalytic core                                                            |
| GlymaPAV0799 | 4 | 4  | 1  | IPR002156; Ribonuclease H domain                                                                |

|              |   |    |    |                                                                                                                    |
|--------------|---|----|----|--------------------------------------------------------------------------------------------------------------------|
| GlymaPAV0800 | 3 | 5  | 1  | IPR000477; Reverse transcriptase                                                                                   |
| GlymaPAV0801 | 1 | 7  | 0  |                                                                                                                    |
| GlymaPAV0802 | 4 | 1  | 4  | IPR001584; Integrase, catalytic core                                                                               |
| GlymaPAV0803 | 3 | 1  | 0  | IPR000477; Reverse transcriptase                                                                                   |
| GlymaPAV0804 | 1 | 1  | 4  |                                                                                                                    |
| GlymaPAV0805 | 2 | 0  | 0  |                                                                                                                    |
| GlymaPAV0806 | 0 | 2  | 0  |                                                                                                                    |
| GlymaPAV0807 | 2 | 0  | 1  |                                                                                                                    |
| GlymaPAV0808 | 2 | 2  | 4  |                                                                                                                    |
| GlymaPAV0809 | 0 | 8  | 11 |                                                                                                                    |
| GlymaPAV0810 | 0 | 0  | 3  | IPR000477; Reverse transcriptase IPR015706; RNA-directed DNA polymerase (reverse transcriptase)                    |
| GlymaPAV0811 | 0 | 2  | 0  | IPR013103; Reverse transcriptase, RNA-dependent DNA polymerase                                                     |
| GlymaPAV0812 | 2 | 0  | 0  | IPR010285; DNA helicase PIF1, ATP-dependent                                                                        |
| GlymaPAV0813 | 1 | 7  | 2  |                                                                                                                    |
| GlymaPAV0814 | 5 | 6  | 13 | IPR001584; Integrase, catalytic core                                                                               |
| GlymaPAV0815 | 3 | 0  | 0  | IPR001584; Integrase, catalytic core                                                                               |
| GlymaPAV0816 | 0 | 3  | 0  |                                                                                                                    |
| GlymaPAV0817 | 2 | 0  | 2  | IPR000999; Ribonuclease III                                                                                        |
| GlymaPAV0818 | 1 | 2  | 0  | IPR006564; Zinc finger, PMZ-type IPR007527; Zinc finger, SWIM-type                                                 |
| GlymaPAV0819 | 1 | 1  | 9  | IPR019557; Aminotransferase-like, plant mobile domain                                                              |
| GlymaPAV0820 | 1 | 2  | 2  | IPR001878; Zinc finger, CCHC-type                                                                                  |
| GlymaPAV0821 | 1 | 0  | 2  | IPR000477; Reverse transcriptase                                                                                   |
| GlymaPAV0822 | 0 | 1  | 1  |                                                                                                                    |
| GlymaPAV0823 | 4 | 3  | 1  |                                                                                                                    |
| GlymaPAV0824 | 4 | 8  | 3  | IPR000477; Reverse transcriptase                                                                                   |
| GlymaPAV0825 | 1 | 4  | 10 | IPR015416; Zinc finger, H2C2-type, histone UAS binding                                                             |
| GlymaPAV0826 | 2 | 5  | 4  |                                                                                                                    |
| GlymaPAV0827 | 2 | 0  | 2  |                                                                                                                    |
| GlymaPAV0828 | 1 | 0  | 2  | IPR001584; Integrase, catalytic core                                                                               |
| GlymaPAV0829 | 1 | 2  | 3  | IPR000477; Reverse transcriptase                                                                                   |
| GlymaPAV0830 | 0 | 1  | 0  |                                                                                                                    |
| GlymaPAV0831 | 0 | 1  | 2  |                                                                                                                    |
| GlymaPAV0832 | 0 | 0  | 1  | IPR001128; Cytochrome P450 IPR002401; Cytochrome P450, E-class, group I IPR017972; Cytochrome P450, conserved site |
| GlymaPAV0833 | 5 | 0  | 0  |                                                                                                                    |
| GlymaPAV0834 | 1 | 0  | 2  | IPR001128; Cytochrome P450 IPR002401; Cytochrome P450, E-class, group I IPR017972; Cytochrome P450, conserved site |
| GlymaPAV0835 | 7 | 2  | 5  | IPR001584; Integrase, catalytic core                                                                               |
| GlymaPAV0836 | 4 | 0  | 1  | IPR002761; Domain of unknown function DUF71, ATP-binding domain                                                    |
| GlymaPAV0837 | 1 | 0  | 0  | IPR000477; Reverse transcriptase IPR015706; RNA-directed DNA polymerase (reverse transcriptase)                    |
| GlymaPAV0838 | 1 | 2  | 0  | IPR000477; Reverse transcriptase IPR015706; RNA-directed DNA polymerase (reverse transcriptase)                    |
| GlymaPAV0839 | 0 | 1  | 2  |                                                                                                                    |
| GlymaPAV0840 | 1 | 13 | 3  | IPR000477; Reverse transcriptase IPR015706; RNA-directed DNA polymerase (reverse transcriptase)                    |
| GlymaPAV0841 | 1 | 0  | 0  | IPR005135; Endonuclease/exonuclease/phosphatase                                                                    |
| GlymaPAV0842 | 0 | 1  | 0  |                                                                                                                    |
| GlymaPAV0843 | 1 | 15 | 2  |                                                                                                                    |
| GlymaPAV0844 | 0 | 7  | 4  |                                                                                                                    |
| GlymaPAV0845 | 2 | 2  | 8  |                                                                                                                    |
| GlymaPAV0846 | 1 | 0  | 3  |                                                                                                                    |
| GlymaPAV0847 | 0 | 1  | 0  | IPR002068; Heat shock protein Hsp20                                                                                |
| GlymaPAV0848 | 1 | 2  | 0  | IPR015706; RNA-directed DNA polymerase (reverse transcriptase)                                                     |
| GlymaPAV0849 | 3 | 10 | 1  | IPR000722; RNA polymerase, alpha subunit                                                                           |
| GlymaPAV0850 | 1 | 13 | 8  |                                                                                                                    |
| GlymaPAV0851 | 0 | 0  | 1  | IPR019557; Aminotransferase-like, plant mobile domain                                                              |
| GlymaPAV0852 | 1 | 5  | 2  | IPR013103; Reverse transcriptase, RNA-dependent DNA polymerase                                                     |
| GlymaPAV0853 | 5 | 32 | 31 |                                                                                                                    |
| GlymaPAV0854 | 1 | 2  | 1  |                                                                                                                    |
| GlymaPAV0855 | 1 | 3  | 2  |                                                                                                                    |

|              |   |    |    |                                                                                                                                                                                                             |
|--------------|---|----|----|-------------------------------------------------------------------------------------------------------------------------------------------------------------------------------------------------------------|
| GlymaPAV0856 | 1 | 1  | 9  | IPR001878; Zinc finger, CCHC-type                                                                                                                                                                           |
| GlymaPAV0857 | 1 | 0  | 0  |                                                                                                                                                                                                             |
| GlymaPAV0858 | 0 | 0  | 4  | IPR000719; Protein kinase, catalytic domain IPR017442; Serine/threonine-protein kinase-like domain                                                                                                          |
| GlymaPAV0859 | 0 | 2  | 0  |                                                                                                                                                                                                             |
| GlymaPAV0860 | 2 | 2  | 2  | IPR001878; Zinc finger, CCHC-type                                                                                                                                                                           |
| GlymaPAV0861 | 1 | 0  | 3  | IPR002198; Short-chain dehydrogenase/reductase SDR                                                                                                                                                          |
| GlymaPAV0862 | 1 | 8  | 9  |                                                                                                                                                                                                             |
| GlymaPAV0863 | 5 | 2  | 5  |                                                                                                                                                                                                             |
| GlymaPAV0864 | 2 | 0  | 0  |                                                                                                                                                                                                             |
| GlymaPAV0865 | 0 | 0  | 1  |                                                                                                                                                                                                             |
| GlymaPAV0866 | 0 | 0  | 1  |                                                                                                                                                                                                             |
| GlymaPAV0867 | 1 | 1  | 0  | IPR003377; Cornichon                                                                                                                                                                                        |
| GlymaPAV0868 | 1 | 1  | 0  | IPR001128; Cytochrome P450                                                                                                                                                                                  |
| GlymaPAV0869 | 1 | 2  | 0  |                                                                                                                                                                                                             |
| GlymaPAV0870 | 0 | 2  | 1  |                                                                                                                                                                                                             |
| GlymaPAV0871 | 1 | 0  | 0  |                                                                                                                                                                                                             |
| GlymaPAV0872 | 1 | 4  | 0  |                                                                                                                                                                                                             |
| GlymaPAV0873 | 2 | 2  | 1  |                                                                                                                                                                                                             |
| GlymaPAV0874 | 1 | 20 | 2  | IPR015706; RNA-directed DNA polymerase (reverse transcriptase)                                                                                                                                              |
| GlymaPAV0875 | 0 | 2  | 1  | IPR018289; MULE transposase, conserved domain                                                                                                                                                               |
| GlymaPAV0876 | 0 | 1  | 1  |                                                                                                                                                                                                             |
| GlymaPAV0877 | 0 | 4  | 0  |                                                                                                                                                                                                             |
| GlymaPAV0878 | 1 | 0  | 0  | IPR018289; MULE transposase, conserved domain                                                                                                                                                               |
| GlymaPAV0879 | 1 | 0  | 1  | IPR000719; Protein kinase, catalytic domain IPR017442; Serine/threonine-protein kinase-like domain IPR020636;<br>Calcium/calmodulin-dependent protein kinase-like IPR020660; CBL-interacting protein kinase |
| GlymaPAV0880 | 5 | 3  | 0  |                                                                                                                                                                                                             |
| GlymaPAV0881 | 1 | 0  | 1  |                                                                                                                                                                                                             |
| GlymaPAV0882 | 2 | 1  | 10 |                                                                                                                                                                                                             |
| GlymaPAV0883 | 1 | 0  | 7  |                                                                                                                                                                                                             |
| GlymaPAV0884 | 1 | 2  | 2  |                                                                                                                                                                                                             |
| GlymaPAV0885 | 1 | 0  | 0  |                                                                                                                                                                                                             |
| GlymaPAV0886 | 0 | 1  | 0  |                                                                                                                                                                                                             |
| GlymaPAV0887 | 2 | 1  | 4  | IPR015706; RNA-directed DNA polymerase (reverse transcriptase)                                                                                                                                              |
| GlymaPAV0888 | 2 | 0  | 1  |                                                                                                                                                                                                             |
| GlymaPAV0889 | 0 | 0  | 2  |                                                                                                                                                                                                             |
| GlymaPAV0890 | 1 | 11 | 1  | IPR000477; Reverse transcriptase                                                                                                                                                                            |
| GlymaPAV0891 | 3 | 5  | 1  |                                                                                                                                                                                                             |
| GlymaPAV0892 | 7 | 7  | 35 |                                                                                                                                                                                                             |
| GlymaPAV0893 | 4 | 13 | 13 | IPR001584; Integrase, catalytic core IPR015416; Zinc finger, H2C2-type, histone UAS binding                                                                                                                 |
| GlymaPAV0894 | 0 | 1  | 0  |                                                                                                                                                                                                             |
| GlymaPAV0895 | 0 | 2  | 1  |                                                                                                                                                                                                             |
| GlymaPAV0896 | 0 | 1  | 0  |                                                                                                                                                                                                             |
| GlymaPAV0897 | 1 | 6  | 4  |                                                                                                                                                                                                             |
| GlymaPAV0898 | 1 | 0  | 1  |                                                                                                                                                                                                             |
| GlymaPAV0899 | 2 | 2  | 0  | IPR015706; RNA-directed DNA polymerase (reverse transcriptase)                                                                                                                                              |
| GlymaPAV0900 | 4 | 13 | 14 | IPR005162; Retrotransposon gag protein                                                                                                                                                                      |
| GlymaPAV0901 | 8 | 1  | 0  | IPR000477; Reverse transcriptase                                                                                                                                                                            |
| GlymaPAV0902 | 1 | 4  | 0  | IPR015706; RNA-directed DNA polymerase (reverse transcriptase)                                                                                                                                              |
| GlymaPAV0903 | 0 | 3  | 0  |                                                                                                                                                                                                             |
| GlymaPAV0904 | 0 | 3  | 1  | IPR001584; Integrase, catalytic core                                                                                                                                                                        |
| GlymaPAV0905 | 2 | 0  | 1  | IPR000477; Reverse transcriptase                                                                                                                                                                            |
| GlymaPAV0906 | 5 | 20 | 13 |                                                                                                                                                                                                             |
| GlymaPAV0907 | 0 | 5  | 2  | IPR015706; RNA-directed DNA polymerase (reverse transcriptase)                                                                                                                                              |
| GlymaPAV0908 | 0 | 6  | 2  |                                                                                                                                                                                                             |
| GlymaPAV0909 | 0 | 0  | 1  |                                                                                                                                                                                                             |
| GlymaPAV0910 | 6 | 0  | 1  |                                                                                                                                                                                                             |
| GlymaPAV0911 | 1 | 8  | 6  |                                                                                                                                                                                                             |
| GlymaPAV0912 | 3 | 27 | 29 | IPR001584; Integrase, catalytic core                                                                                                                                                                        |



|              |   |    |    |                                                                                                 |
|--------------|---|----|----|-------------------------------------------------------------------------------------------------|
| GlymaPAV0913 | 0 | 5  | 0  |                                                                                                 |
| GlymaPAV0914 | 0 | 1  | 2  |                                                                                                 |
| GlymaPAV0915 | 4 | 15 | 15 | IPR001584; Integrase, catalytic core                                                            |
| GlymaPAV0916 | 1 | 0  | 0  |                                                                                                 |
| GlymaPAV0917 | 2 | 1  | 0  |                                                                                                 |
| GlymaPAV0918 | 0 | 0  | 5  |                                                                                                 |
| GlymaPAV0919 | 1 | 1  | 0  |                                                                                                 |
| GlymaPAV0920 | 0 | 1  | 4  |                                                                                                 |
| GlymaPAV0921 | 0 | 1  | 2  | IPR010285; DNA helicase PIF1, ATP-dependent                                                     |
| GlymaPAV0922 | 1 | 1  | 0  |                                                                                                 |
| GlymaPAV0923 | 1 | 0  | 0  |                                                                                                 |
| GlymaPAV0924 | 1 | 0  | 0  |                                                                                                 |
| GlymaPAV0925 | 0 | 1  | 2  | IPR000477; Reverse transcriptase IPR015706; RNA-directed DNA polymerase (reverse transcriptase) |
| GlymaPAV0926 | 0 | 0  | 1  | IPR000440; NADH:ubiquinone/plastoquinone oxidoreductase, chain 3                                |
| GlymaPAV0927 | 1 | 0  | 3  | IPR013103; Reverse transcriptase, RNA-dependent DNA polymerase                                  |
| GlymaPAV0928 | 2 | 14 | 6  | IPR001584; Integrase, catalytic core                                                            |
| GlymaPAV0929 | 2 | 6  | 7  |                                                                                                 |
| GlymaPAV0930 | 0 | 0  | 1  | IPR013103; Reverse transcriptase, RNA-dependent DNA polymerase                                  |
| GlymaPAV0931 | 1 | 0  | 0  | IPR001878; Zinc finger, CCHC-type                                                               |
| GlymaPAV0932 | 3 | 25 | 5  |                                                                                                 |
| GlymaPAV0933 | 1 | 0  | 0  | IPR019557; Aminotransferase-like, plant mobile domain                                           |
| GlymaPAV0934 | 1 | 7  | 1  | IPR019557; Aminotransferase-like, plant mobile domain                                           |
| GlymaPAV0935 | 2 | 5  | 7  | IPR002085; Alcohol dehydrogenase superfamily, zinc-containing                                   |
| GlymaPAV0936 | 0 | 0  | 1  |                                                                                                 |
| GlymaPAV0937 | 1 | 1  | 1  | IPR013103; Reverse transcriptase, RNA-dependent DNA polymerase                                  |
| GlymaPAV0938 | 0 | 1  | 1  |                                                                                                 |
| GlymaPAV0939 | 0 | 2  | 4  | IPR013103; Reverse transcriptase, RNA-dependent DNA polymerase                                  |
| GlymaPAV0940 | 1 | 11 | 4  |                                                                                                 |
| GlymaPAV0941 | 1 | 0  | 0  | IPR019557; Aminotransferase-like, plant mobile domain                                           |
| GlymaPAV0942 | 2 | 3  | 6  |                                                                                                 |
| GlymaPAV0943 | 3 | 2  | 2  | IPR019636; Cell wall-associated hydrolase                                                       |
| GlymaPAV0944 | 4 | 11 | 11 | IPR013103; Reverse transcriptase, RNA-dependent DNA polymerase                                  |
| GlymaPAV0945 | 0 | 2  | 1  |                                                                                                 |
| GlymaPAV0946 | 3 | 0  | 0  |                                                                                                 |
| GlymaPAV0947 | 0 | 0  | 3  |                                                                                                 |
| GlymaPAV0948 | 0 | 1  | 0  |                                                                                                 |
| GlymaPAV0949 | 1 | 2  | 6  | IPR005162; Retrotransposon gag protein                                                          |
| GlymaPAV0950 | 0 | 0  | 8  |                                                                                                 |
| GlymaPAV0951 | 0 | 0  | 5  |                                                                                                 |
| GlymaPAV0952 | 0 | 2  | 0  |                                                                                                 |
| GlymaPAV0953 | 0 | 4  | 1  |                                                                                                 |
| GlymaPAV0954 | 0 | 0  | 3  |                                                                                                 |
| GlymaPAV0955 | 1 | 7  | 3  |                                                                                                 |
| GlymaPAV0956 | 0 | 1  | 0  |                                                                                                 |
| GlymaPAV0957 | 0 | 1  | 0  |                                                                                                 |
| GlymaPAV0958 | 5 | 11 | 14 |                                                                                                 |
| GlymaPAV0959 | 1 | 0  | 1  |                                                                                                 |
| GlymaPAV0960 | 1 | 8  | 1  |                                                                                                 |
| GlymaPAV0961 | 1 | 13 | 8  | IPR019557; Aminotransferase-like, plant mobile domain                                           |
| GlymaPAV0962 | 2 | 1  | 7  | IPR005162; Retrotransposon gag protein                                                          |
| GlymaPAV0963 | 0 | 1  | 0  |                                                                                                 |
| GlymaPAV0964 | 1 | 12 | 2  |                                                                                                 |
| GlymaPAV0965 | 0 | 0  | 1  | IPR001750; NADH:ubiquinone/plastoquinone oxidoreductase                                         |
| GlymaPAV0966 | 0 | 3  | 0  |                                                                                                 |
| GlymaPAV0967 | 1 | 22 | 24 | IPR003480; Transferase                                                                          |
| GlymaPAV0968 | 0 | 2  | 0  |                                                                                                 |
| GlymaPAV0969 | 3 | 7  | 10 |                                                                                                 |
| GlymaPAV0970 | 2 | 4  | 3  |                                                                                                 |

|              |      |      |      |                                                         |
|--------------|------|------|------|---------------------------------------------------------|
| GlymaPAV0971 | 3    | 0    | 1    |                                                         |
| GlymaPAV0972 | 0    | 2    | 3    |                                                         |
| GlymaPAV0973 | 1    | 0    | 0    |                                                         |
| GlymaPAV0974 | 2    | 0    | 0    | IPR000767; Disease resistance protein IPR002182; NB-ARC |
| GlymaPAV0975 | 0    | 6    | 1    |                                                         |
| GlymaPAV0976 | 0    | 0    | 3    |                                                         |
| GlymaPAV0977 | 1    | 0    | 0    |                                                         |
| GlymaPAV0978 | 0    | 1    | 6    |                                                         |
| GlymaPAV0979 | 0    | 1    | 0    |                                                         |
| GlymaPAV0980 | 0    | 6    | 12   |                                                         |
| GlymaPAV0981 | 0    | 0    | 1    |                                                         |
| GlymaPAV0982 | 0    | 2    | 1    | IPR006904; Protein of unknown function DUF716, TMEM45   |
| GlymaPAV0983 | 0    | 1    | 0    |                                                         |
| GlymaPAV0984 | 0    | 2    | 0    |                                                         |
| GlymaPAV0985 | 3    | 7    | 9    | IPR005162; Retrotransposon gag protein                  |
| GlymaPAV0986 | 1    | 1    | 5    | IPR013242; Retroviral aspartyl protease                 |
| GlymaPAV0987 | 0    | 20   | 3    |                                                         |
| GlymaPAV0988 | 1    | 1    | 9    |                                                         |
| GlymaPAV0989 | 2    | 3    | 5    | IPR013242; Retroviral aspartyl protease                 |
| GlymaPAV0990 | 0    | 3    | 2    |                                                         |
| GlymaPAV0991 | 1    | 0    | 1    | IPR002902; Domain of unknown function DUF26             |
| GlymaPAV0992 | 2    | 0    | 3    | IPR005162; Retrotransposon gag protein                  |
| GlymaPAV0993 | 1    | 5    | 9    | IPR005162; Retrotransposon gag protein                  |
| Total        | 1579 | 3139 | 3184 |                                                         |

**Supplementary Table 7. Population structure analysis of soybean germplasm**

| Location    | ID    | K=2   |      | K=3  |      |      | K=4  |      |      |      | K=5  |      |      |      | K=6  |      |      |      |      |      |      |      |
|-------------|-------|-------|------|------|------|------|------|------|------|------|------|------|------|------|------|------|------|------|------|------|------|------|
| China       | HN063 | HN063 | 0.18 | 0.82 | 0.27 | 0.73 | 0.00 | 0.00 | 0.75 | 0.00 | 0.25 | 0.31 | 0.29 | 0.00 | 0.41 | 0.00 | 0.00 | 0.27 | 0.43 | 0.30 | 0.00 | 0.00 |
| South Korea | HN052 | HN052 | 0.36 | 0.64 | 0.00 | 1.00 | 0.00 | 0.00 | 1.00 | 0.00 | 0.00 | 1.00 | 0.00 | 0.00 | 0.00 | 0.00 | 0.06 | 0.94 | 0.00 | 0.00 | 0.00 | 0.00 |
| South Korea | HN046 | HN046 | 0.35 | 0.65 | 0.00 | 1.00 | 0.00 | 0.00 | 1.00 | 0.00 | 0.00 | 1.00 | 0.00 | 0.00 | 0.00 | 0.00 | 0.05 | 0.96 | 0.00 | 0.00 | 0.00 | 0.00 |
| South Korea | HN053 | HN053 | 0.34 | 0.66 | 0.00 | 1.00 | 0.00 | 0.00 | 1.00 | 0.00 | 0.00 | 1.00 | 0.00 | 0.00 | 0.00 | 0.00 | 0.00 | 1.00 | 0.00 | 0.00 | 0.00 | 0.00 |
| Japan       | HN040 | HN040 | 0.46 | 0.54 | 0.00 | 0.89 | 0.11 | 0.41 | 0.44 | 0.15 | 0.00 | 0.86 | 0.00 | 0.14 | 0.00 | 0.00 | 0.20 | 0.80 | 0.00 | 0.00 | 0.00 | 0.00 |
| South Korea | HN045 | HN045 | 0.42 | 0.58 | 0.00 | 1.00 | 0.00 | 1.00 | 0.00 | 0.00 | 0.00 | 1.00 | 0.00 | 0.00 | 0.00 | 0.00 | 0.07 | 0.93 | 0.00 | 0.00 | 0.00 | 0.00 |
| Japan       | HN039 | HN039 | 0.47 | 0.53 | 0.00 | 0.80 | 0.20 | 0.80 | 0.00 | 0.20 | 0.00 | 0.79 | 0.00 | 0.19 | 0.00 | 0.02 | 0.27 | 0.73 | 0.00 | 0.00 | 0.00 | 0.00 |
| South Korea | HN051 | HN051 | 0.66 | 0.35 | 0.08 | 0.38 | 0.54 | 0.10 | 0.28 | 0.55 | 0.08 | 0.21 | 0.11 | 0.60 | 0.09 | 0.00 | 0.60 | 0.17 | 0.00 | 0.09 | 0.00 | 0.15 |
| China       | HN031 | HN031 | 0.65 | 0.35 | 0.26 | 0.15 | 0.59 | 0.00 | 0.15 | 0.60 | 0.25 | 0.00 | 0.28 | 0.58 | 0.09 | 0.06 | 0.63 | 0.00 | 0.00 | 0.25 | 0.00 | 0.12 |
| Japan       | HN032 | HN032 | 0.50 | 0.50 | 0.38 | 0.20 | 0.42 | 0.00 | 0.20 | 0.43 | 0.37 | 0.00 | 0.39 | 0.30 | 0.14 | 0.18 | 0.47 | 0.00 | 0.00 | 0.38 | 0.00 | 0.15 |
| China       | HN058 | HN058 | 0.64 | 0.36 | 0.38 | 0.01 | 0.61 | 0.02 | 0.00 | 0.61 | 0.38 | 0.00 | 0.39 | 0.51 | 0.00 | 0.10 | 0.61 | 0.00 | 0.00 | 0.37 | 0.00 | 0.02 |
| China       | HN097 | HN097 | 0.59 | 0.41 | 0.42 | 0.01 | 0.57 | 0.01 | 0.01 | 0.57 | 0.42 | 0.00 | 0.43 | 0.46 | 0.00 | 0.11 | 0.57 | 0.00 | 0.00 | 0.41 | 0.00 | 0.02 |
| South Korea | HN007 | HN007 | 0.73 | 0.27 | 0.28 | 0.02 | 0.70 | 0.02 | 0.00 | 0.70 | 0.28 | 0.00 | 0.29 | 0.63 | 0.00 | 0.08 | 0.69 | 0.00 | 0.00 | 0.28 | 0.00 | 0.03 |
| South Korea | HN023 | HN023 | 0.81 | 0.19 | 0.18 | 0.04 | 0.78 | 0.01 | 0.03 | 0.78 | 0.18 | 0.00 | 0.20 | 0.72 | 0.01 | 0.08 | 0.78 | 0.00 | 0.00 | 0.17 | 0.00 | 0.05 |
| Japan       | HN011 | HN011 | 0.53 | 0.47 | 0.49 | 0.00 | 0.51 | 0.00 | 0.00 | 0.51 | 0.49 | 0.00 | 0.50 | 0.36 | 0.00 | 0.14 | 0.51 | 0.00 | 0.00 | 0.49 | 0.00 | 0.00 |
| China       | HN080 | HN080 | 0.54 | 0.46 | 0.47 | 0.00 | 0.53 | 0.00 | 0.00 | 0.53 | 0.48 | 0.00 | 0.48 | 0.37 | 0.00 | 0.15 | 0.52 | 0.00 | 0.00 | 0.47 | 0.01 | 0.00 |
| China       | HN078 | HN078 | 0.58 | 0.42 | 0.43 | 0.01 | 0.56 | 0.00 | 0.01 | 0.56 | 0.43 | 0.00 | 0.43 | 0.40 | 0.01 | 0.16 | 0.56 | 0.00 | 0.00 | 0.42 | 0.02 | 0.00 |
| China       | HN079 | HN079 | 0.58 | 0.42 | 0.43 | 0.02 | 0.55 | 0.00 | 0.02 | 0.55 | 0.42 | 0.00 | 0.43 | 0.39 | 0.02 | 0.17 | 0.56 | 0.00 | 0.00 | 0.42 | 0.03 | 0.00 |
| Japan       | HN021 | HN021 | 0.46 | 0.54 | 0.54 | 0.04 | 0.42 | 0.05 | 0.00 | 0.41 | 0.54 | 0.01 | 0.55 | 0.33 | 0.02 | 0.10 | 0.42 | 0.00 | 0.00 | 0.54 | 0.00 | 0.04 |
| China       | HN067 | HN067 | 0.47 | 0.53 | 0.55 | 0.00 | 0.45 | 0.00 | 0.00 | 0.45 | 0.55 | 0.00 | 0.55 | 0.26 | 0.00 | 0.19 | 0.45 | 0.00 | 0.00 | 0.55 | 0.00 | 0.00 |
| China       | HN009 | HN009 | 0.51 | 0.49 | 0.51 | 0.00 | 0.49 | 0.00 | 0.00 | 0.49 | 0.51 | 0.00 | 0.52 | 0.31 | 0.00 | 0.17 | 0.49 | 0.00 | 0.00 | 0.51 | 0.00 | 0.00 |
| China       | HN010 | HN010 | 0.17 | 0.83 | 0.83 | 0.00 | 0.17 | 0.00 | 0.00 | 0.17 | 0.83 | 0.00 | 0.83 | 0.10 | 0.00 | 0.07 | 0.17 | 0.00 | 0.00 | 0.83 | 0.00 | 0.00 |
| China       | HN077 | HN077 | 0.23 | 0.77 | 0.75 | 0.04 | 0.21 | 0.00 | 0.04 | 0.21 | 0.75 | 0.00 | 0.75 | 0.17 | 0.03 | 0.05 | 0.22 | 0.00 | 0.00 | 0.75 | 0.04 | 0.00 |
| China       | HN016 | HN016 | 0.00 | 1.00 | 1.00 | 0.00 | 0.00 | 0.00 | 0.00 | 0.00 | 1.00 | 0.00 | 0.98 | 0.00 | 0.01 | 0.01 | 0.02 | 0.00 | 0.00 | 0.98 | 0.00 | 0.00 |
| China       | HN075 | HN075 | 0.00 | 1.00 | 1.00 | 0.00 | 0.00 | 0.00 | 0.00 | 0.00 | 1.00 | 0.00 | 1.00 | 0.00 | 0.00 | 0.00 | 0.00 | 0.00 | 0.00 | 1.00 | 0.00 | 0.00 |
| China       | HN012 | HN012 | 0.00 | 1.00 | 1.00 | 0.00 | 0.00 | 0.00 | 0.00 | 0.00 | 1.00 | 0.00 | 0.99 | 0.00 | 0.01 | 0.00 | 0.02 | 0.00 | 0.00 | 0.98 | 0.00 | 0.00 |
| China       | HN025 | HN025 | 0.00 | 1.00 | 1.00 | 0.00 | 0.00 | 0.00 | 0.00 | 0.00 | 1.00 | 0.00 | 0.99 | 0.00 | 0.01 | 0.00 | 0.01 | 0.00 | 0.01 | 0.99 | 0.00 | 0.00 |
| China       | HN076 | HN076 | 0.00 | 1.00 | 1.00 | 0.00 | 0.00 | 0.00 | 0.00 | 0.00 | 1.00 | 0.00 | 1.00 | 0.00 | 0.00 | 0.00 | 0.00 | 0.00 | 0.00 | 1.00 | 0.00 | 0.00 |
| China       | HN022 | HN022 | 0.00 | 1.00 | 1.00 | 0.00 | 0.00 | 0.00 | 0.00 | 0.00 | 1.00 | 0.00 | 1.00 | 0.00 | 0.00 | 0.00 | 0.00 | 0.00 | 0.00 | 1.00 | 0.00 | 0.00 |
| China       | HN015 | HN015 | 0.00 | 1.00 | 1.00 | 0.00 | 0.00 | 0.00 | 0.00 | 0.00 | 1.00 | 0.00 | 1.00 | 0.00 | 0.00 | 0.00 | 0.00 | 0.00 | 0.00 | 1.00 | 0.00 | 0.00 |
| Japan       | HN106 | HN106 | 0.00 | 1.00 | 1.00 | 0.00 | 0.00 | 0.00 | 0.00 | 0.00 | 1.00 | 0.00 | 1.00 | 0.00 | 0.00 | 0.00 | 0.00 | 0.00 | 0.00 | 1.00 | 0.00 | 0.00 |
| China       | HN008 | HN008 | 0.00 | 1.00 | 1.00 | 0.00 | 0.00 | 0.00 | 0.00 | 0.00 | 1.00 | 0.00 | 1.00 | 0.00 | 0.00 | 0.00 | 0.00 | 0.00 | 0.00 | 1.00 | 0.00 | 0.00 |
| China       | HN024 | HN024 | 0.30 | 0.70 | 0.72 | 0.00 | 0.28 | 0.00 | 0.00 | 0.28 | 0.72 | 0.00 | 0.72 | 0.12 | 0.00 | 0.16 | 0.29 | 0.00 | 0.00 | 0.71 | 0.00 | 0.00 |
| North Korea | HN026 | HN026 | 0.29 | 0.71 | 0.72 | 0.00 | 0.28 | 0.00 | 0.00 | 0.28 | 0.72 | 0.00 | 0.72 | 0.16 | 0.00 | 0.12 | 0.28 | 0.00 | 0.00 | 0.72 | 0.00 | 0.00 |
| N/A         | HN104 | HN104 | 0.20 | 0.80 | 0.80 | 0.00 | 0.20 | 0.00 | 0.00 | 0.20 | 0.80 | 0.00 | 0.80 | 0.13 | 0.00 | 0.06 | 0.21 | 0.00 | 0.00 | 0.80 | 0.00 | 0.00 |
| North Korea | HN068 | HN068 | 0.05 | 0.95 | 0.94 | 0.00 | 0.06 | 0.00 | 0.00 | 0.06 | 0.94 | 0.00 | 0.94 | 0.00 | 0.00 | 0.06 | 0.07 | 0.00 | 0.00 | 0.93 | 0.00 | 0.00 |
| Japan       | HN034 | HN034 | 0.06 | 0.94 | 0.93 | 0.00 | 0.07 | 0.00 | 0.00 | 0.07 | 0.93 | 0.00 | 0.94 | 0.06 | 0.00 | 0.01 | 0.07 | 0.00 | 0.00 | 0.93 | 0.00 | 0.00 |
| China       | HN060 | HN060 | 0.02 | 0.98 | 0.96 | 0.00 | 0.04 | 0.00 | 0.00 | 0.04 | 0.96 | 0.00 | 0.97 | 0.03 | 0.00 | 0.00 | 0.05 | 0.00 | 0.00 | 0.95 | 0.00 | 0.00 |
| China       | HN017 | HN017 | 0.04 | 0.96 | 0.96 | 0.00 | 0.04 | 0.00 | 0.00 | 0.04 | 0.96 | 0.00 | 0.96 | 0.00 | 0.00 | 0.05 | 0.05 | 0.00 | 0.00 | 0.96 | 0.00 | 0.00 |

|                    |       |       |      |      |      |      |      |      |      |      |      |      |      |      |      |      |      |      |      |      |      |      |
|--------------------|-------|-------|------|------|------|------|------|------|------|------|------|------|------|------|------|------|------|------|------|------|------|------|
| China              | HN020 | HN020 | 0.05 | 0.95 | 0.95 | 0.00 | 0.05 | 0.00 | 0.00 | 0.05 | 0.95 | 0.00 | 0.94 | 0.00 | 0.00 | 0.06 | 0.06 | 0.00 | 0.00 | 0.94 | 0.00 | 0.00 |
| China              | HN004 | HN004 | 0.02 | 0.99 | 0.97 | 0.00 | 0.03 | 0.00 | 0.00 | 0.03 | 0.97 | 0.00 | 0.97 | 0.00 | 0.00 | 0.03 | 0.03 | 0.00 | 0.00 | 0.97 | 0.00 | 0.00 |
| China              | HN072 | HN072 | 0.00 | 1.00 | 1.00 | 0.00 | 0.00 | 0.00 | 0.00 | 0.00 | 1.00 | 0.00 | 1.00 | 0.00 | 0.00 | 0.00 | 0.00 | 0.00 | 0.00 | 1.00 | 0.00 | 0.00 |
| China              | HN047 | HN047 | 0.00 | 1.00 | 1.00 | 0.00 | 0.00 | 0.00 | 0.00 | 0.00 | 1.00 | 0.00 | 1.00 | 0.00 | 0.00 | 0.00 | 0.00 | 0.00 | 0.00 | 1.00 | 0.00 | 0.00 |
| China              | HN069 | HN069 | 0.00 | 1.00 | 1.00 | 0.00 | 0.00 | 0.00 | 0.00 | 0.00 | 1.00 | 0.00 | 1.00 | 0.00 | 0.00 | 0.00 | 0.00 | 0.00 | 0.00 | 1.00 | 0.00 | 0.00 |
| China              | HN003 | HN003 | 0.00 | 1.00 | 1.00 | 0.00 | 0.00 | 0.00 | 0.00 | 0.00 | 1.00 | 0.00 | 1.00 | 0.00 | 0.00 | 0.00 | 0.00 | 0.00 | 0.00 | 1.00 | 0.00 | 0.00 |
| China              | HN018 | HN018 | 0.00 | 1.00 | 1.00 | 0.00 | 0.00 | 0.00 | 0.00 | 0.00 | 1.00 | 0.00 | 1.00 | 0.00 | 0.00 | 0.00 | 0.00 | 0.00 | 0.00 | 1.00 | 0.00 | 0.00 |
| China              | HN055 | HN055 | 0.00 | 1.00 | 0.98 | 0.00 | 0.02 | 0.00 | 0.00 | 0.02 | 0.98 | 0.00 | 0.97 | 0.00 | 0.00 | 0.03 | 0.02 | 0.00 | 0.00 | 0.98 | 0.00 | 0.00 |
| China              | HN005 | HN005 | 0.00 | 1.00 | 1.00 | 0.00 | 0.00 | 0.00 | 0.00 | 0.00 | 1.00 | 0.00 | 1.00 | 0.00 | 0.00 | 0.00 | 0.00 | 0.00 | 0.00 | 1.00 | 0.00 | 0.00 |
| China              | HN019 | HN019 | 0.00 | 1.00 | 1.00 | 0.00 | 0.00 | 0.00 | 0.00 | 0.00 | 1.00 | 0.00 | 1.00 | 0.00 | 0.00 | 0.00 | 0.00 | 0.00 | 0.00 | 1.00 | 0.00 | 0.00 |
| China              | HN002 | HN002 | 0.00 | 1.00 | 1.00 | 0.00 | 0.00 | 0.00 | 0.00 | 0.00 | 1.00 | 0.00 | 1.00 | 0.00 | 0.00 | 0.00 | 0.00 | 0.00 | 0.00 | 1.00 | 0.00 | 0.00 |
| China              | HN091 | HN091 | 0.83 | 0.17 | 0.16 | 0.03 | 0.81 | 0.04 | 0.00 | 0.80 | 0.16 | 0.00 | 0.17 | 0.64 | 0.01 | 0.18 | 0.81 | 0.00 | 0.00 | 0.16 | 0.00 | 0.04 |
| China              | HN074 | HN074 | 0.78 | 0.22 | 0.24 | 0.00 | 0.76 | 0.00 | 0.00 | 0.75 | 0.25 | 0.00 | 0.24 | 0.60 | 0.00 | 0.16 | 0.75 | 0.00 | 0.00 | 0.24 | 0.01 | 0.00 |
| China              | HN090 | HN090 | 0.79 | 0.21 | 0.19 | 0.05 | 0.76 | 0.06 | 0.00 | 0.75 | 0.19 | 0.00 | 0.20 | 0.63 | 0.03 | 0.14 | 0.77 | 0.00 | 0.00 | 0.18 | 0.00 | 0.05 |
| Vietnam            | HN098 | HN098 | 0.80 | 0.20 | 0.19 | 0.03 | 0.78 | 0.04 | 0.00 | 0.77 | 0.20 | 0.00 | 0.20 | 0.66 | 0.01 | 0.13 | 0.78 | 0.00 | 0.00 | 0.19 | 0.00 | 0.03 |
| China              | HN083 | HN083 | 0.71 | 0.29 | 0.31 | 0.00 | 0.69 | 0.00 | 0.00 | 0.69 | 0.31 | 0.00 | 0.31 | 0.50 | 0.00 | 0.19 | 0.69 | 0.00 | 0.00 | 0.30 | 0.01 | 0.00 |
| China              | HN082 | HN082 | 0.57 | 0.43 | 0.45 | 0.00 | 0.55 | 0.00 | 0.00 | 0.55 | 0.45 | 0.00 | 0.46 | 0.42 | 0.00 | 0.13 | 0.55 | 0.00 | 0.00 | 0.45 | 0.01 | 0.00 |
| China              | HN085 | HN085 | 0.63 | 0.37 | 0.39 | 0.00 | 0.61 | 0.00 | 0.00 | 0.61 | 0.39 | 0.00 | 0.39 | 0.50 | 0.00 | 0.10 | 0.61 | 0.00 | 0.00 | 0.39 | 0.00 | 0.00 |
| China              | HN084 | HN084 | 0.59 | 0.41 | 0.44 | 0.00 | 0.57 | 0.00 | 0.00 | 0.57 | 0.44 | 0.00 | 0.44 | 0.45 | 0.00 | 0.12 | 0.57 | 0.00 | 0.00 | 0.43 | 0.00 | 0.00 |
| China              | HN086 | HN086 | 0.59 | 0.41 | 0.43 | 0.00 | 0.57 | 0.00 | 0.00 | 0.57 | 0.43 | 0.00 | 0.43 | 0.46 | 0.00 | 0.11 | 0.57 | 0.00 | 0.00 | 0.43 | 0.00 | 0.00 |
| Sweden             | HN105 | HN105 | 0.90 | 0.10 | 0.10 | 0.04 | 0.86 | 0.06 | 0.00 | 0.85 | 0.10 | 0.00 | 0.12 | 0.78 | 0.00 | 0.11 | 0.86 | 0.00 | 0.00 | 0.09 | 0.00 | 0.04 |
| U.S.               | HN103 | HN103 | 1.00 | 0.00 | 0.00 | 0.00 | 1.00 | 0.00 | 0.00 | 1.00 | 0.00 | 0.00 | 0.00 | 0.67 | 0.00 | 0.33 | 1.00 | 0.00 | 0.00 | 0.00 | 0.00 | 0.00 |
| Japan              | HN107 | HN107 | 1.00 | 0.00 | 0.00 | 0.05 | 0.95 | 0.07 | 0.00 | 0.93 | 0.00 | 0.00 | 0.00 | 0.97 | 0.00 | 0.03 | 0.95 | 0.00 | 0.00 | 0.00 | 0.00 | 0.05 |
| Japan              | HN037 | HN037 | 1.00 | 0.00 | 0.00 | 0.06 | 0.94 | 0.08 | 0.00 | 0.92 | 0.00 | 0.02 | 0.00 | 0.94 | 0.00 | 0.04 | 0.95 | 0.00 | 0.00 | 0.00 | 0.00 | 0.06 |
| Japan              | HN050 | HN050 | 1.00 | 0.00 | 0.00 | 0.03 | 0.97 | 0.05 | 0.00 | 0.95 | 0.00 | 0.00 | 0.00 | 0.94 | 0.00 | 0.06 | 0.97 | 0.00 | 0.00 | 0.00 | 0.00 | 0.03 |
| South Korea        | HN089 | HN089 | 1.00 | 0.00 | 0.00 | 0.06 | 0.94 | 0.09 | 0.00 | 0.92 | 0.00 | 0.00 | 0.00 | 0.93 | 0.00 | 0.07 | 0.95 | 0.00 | 0.00 | 0.00 | 0.00 | 0.05 |
| Japan              | HN038 | HN038 | 1.00 | 0.00 | 0.00 | 0.03 | 0.97 | 0.06 | 0.00 | 0.95 | 0.00 | 0.00 | 0.00 | 0.96 | 0.00 | 0.04 | 0.97 | 0.00 | 0.00 | 0.00 | 0.00 | 0.03 |
| North Korea        | HN096 | HN096 | 0.97 | 0.03 | 0.03 | 0.04 | 0.94 | 0.02 | 0.02 | 0.93 | 0.03 | 0.00 | 0.03 | 0.87 | 0.00 | 0.10 | 0.94 | 0.00 | 0.00 | 0.01 | 0.00 | 0.05 |
| North Korea        | HN033 | HN033 | 1.00 | 0.00 | 0.00 | 0.00 | 1.00 | 0.02 | 0.00 | 0.99 | 0.00 | 0.00 | 0.00 | 0.87 | 0.00 | 0.13 | 0.98 | 0.00 | 0.00 | 0.00 | 0.00 | 0.02 |
| South Korea        | HN049 | HN049 | 1.00 | 0.00 | 0.00 | 0.00 | 1.00 | 0.00 | 0.00 | 1.00 | 0.00 | 0.00 | 0.00 | 0.94 | 0.00 | 0.06 | 1.00 | 0.00 | 0.00 | 0.00 | 0.00 | 0.00 |
| South Korea        | HN048 | HN048 | 1.00 | 0.00 | 0.00 | 0.06 | 0.94 | 0.07 | 0.00 | 0.93 | 0.00 | 0.00 | 0.00 | 0.98 | 0.00 | 0.02 | 0.94 | 0.00 | 0.00 | 0.00 | 0.00 | 0.06 |
| North Korea        | HN093 | HN093 | 1.00 | 0.00 | 0.00 | 0.00 | 1.00 | 0.02 | 0.00 | 0.98 | 0.00 | 0.00 | 0.00 | 0.88 | 0.00 | 0.12 | 0.98 | 0.00 | 0.00 | 0.00 | 0.00 | 0.02 |
| South Korea        | HN006 | HN006 | 1.00 | 0.00 | 0.00 | 0.03 | 0.97 | 0.04 | 0.00 | 0.96 | 0.00 | 0.00 | 0.01 | 0.95 | 0.00 | 0.04 | 0.96 | 0.00 | 0.00 | 0.00 | 0.00 | 0.04 |
| South Korea        | HN035 | HN035 | 1.00 | 0.00 | 0.00 | 0.00 | 1.00 | 0.00 | 0.00 | 1.00 | 0.00 | 0.00 | 0.00 | 1.00 | 0.00 | 0.00 | 0.98 | 0.00 | 0.00 | 0.00 | 0.00 | 0.02 |
| North Korea        | HN095 | HN095 | 1.00 | 0.00 | 0.00 | 0.01 | 0.99 | 0.03 | 0.00 | 0.98 | 0.00 | 0.00 | 0.00 | 1.00 | 0.00 | 0.00 | 0.98 | 0.00 | 0.00 | 0.00 | 0.00 | 0.02 |
| North Korea        | HN094 | HN094 | 1.00 | 0.00 | 0.02 | 0.00 | 0.98 | 0.01 | 0.00 | 0.97 | 0.02 | 0.00 | 0.00 | 0.92 | 0.00 | 0.08 | 0.97 | 0.00 | 0.00 | 0.02 | 0.00 | 0.02 |
| South Korea        | HN044 | HN044 | 1.00 | 0.00 | 0.00 | 0.00 | 1.00 | 0.00 | 0.00 | 1.00 | 0.00 | 0.00 | 0.00 | 1.00 | 0.00 | 0.00 | 1.00 | 0.00 | 0.00 | 0.00 | 0.00 | 0.00 |
| South Korea        | HN043 | HN043 | 1.00 | 0.00 | 0.00 | 0.00 | 1.00 | 0.00 | 0.00 | 1.00 | 0.00 | 0.00 | 0.00 | 1.00 | 0.00 | 0.00 | 1.00 | 0.00 | 0.00 | 0.00 | 0.00 | 0.00 |
| South Korea        | HN041 | HN041 | 1.00 | 0.00 | 0.00 | 0.00 | 1.00 | 0.00 | 0.00 | 1.00 | 0.00 | 0.00 | 0.00 | 1.00 | 0.00 | 0.00 | 1.00 | 0.00 | 0.00 | 0.00 | 0.00 | 0.00 |
| South Korea        | HN042 | HN042 | 1.00 | 0.00 | 0.00 | 0.00 | 1.00 | 0.00 | 0.00 | 1.00 | 0.00 | 0.00 | 0.00 | 1.00 | 0.00 | 0.00 | 1.00 | 0.00 | 0.00 | 0.00 | 0.00 | 0.00 |
| China              | HN057 | HN057 | 0.93 | 0.07 | 0.09 | 0.00 | 0.91 | 0.00 | 0.00 | 0.91 | 0.09 | 0.00 | 0.08 | 0.44 | 0.00 | 0.49 | 0.91 | 0.00 | 0.00 | 0.09 | 0.00 | 0.00 |
| Russian Federation | HN054 | HN054 | 0.98 | 0.02 | 0.04 | 0.00 | 0.96 | 0.00 | 0.00 | 0.96 | 0.04 | 0.00 | 0.03 | 0.34 | 0.00 | 0.63 | 0.96 | 0.00 | 0.00 | 0.04 | 0.00 | 0.00 |

|                  |              |       |      |      |      |      |      |      |      |      |      |      |      |      |      |      |      |      |      |      |      |      |
|------------------|--------------|-------|------|------|------|------|------|------|------|------|------|------|------|------|------|------|------|------|------|------|------|------|
| China            | <b>HN056</b> | HN056 | 0.85 | 0.15 | 0.17 | 0.00 | 0.83 | 0.00 | 0.00 | 0.83 | 0.17 | 0.00 | 0.15 | 0.20 | 0.00 | 0.65 | 0.83 | 0.00 | 0.00 | 0.17 | 0.00 | 0.00 |
| China            | <b>HN059</b> | HN059 | 0.86 | 0.14 | 0.16 | 0.00 | 0.84 | 0.00 | 0.00 | 0.84 | 0.16 | 0.00 | 0.15 | 0.36 | 0.00 | 0.50 | 0.84 | 0.00 | 0.00 | 0.16 | 0.00 | 0.00 |
| U.S.             | <b>HN013</b> | HN013 | 0.95 | 0.05 | 0.07 | 0.00 | 0.93 | 0.00 | 0.00 | 0.93 | 0.07 | 0.00 | 0.06 | 0.26 | 0.00 | 0.68 | 0.93 | 0.00 | 0.00 | 0.08 | 0.00 | 0.00 |
| U.S.             | <b>HN027</b> | HN027 | 0.98 | 0.02 | 0.04 | 0.00 | 0.96 | 0.00 | 0.00 | 0.96 | 0.04 | 0.00 | 0.03 | 0.13 | 0.00 | 0.85 | 0.96 | 0.00 | 0.00 | 0.05 | 0.00 | 0.00 |
| Nepal            | <b>HN061</b> | HN061 | 0.98 | 0.02 | 0.04 | 0.00 | 0.96 | 0.00 | 0.00 | 0.96 | 0.04 | 0.00 | 0.03 | 0.47 | 0.00 | 0.50 | 0.96 | 0.00 | 0.00 | 0.04 | 0.00 | 0.00 |
| U.S.             | <b>HN071</b> | HN071 | 0.95 | 0.05 | 0.07 | 0.00 | 0.93 | 0.00 | 0.00 | 0.93 | 0.07 | 0.00 | 0.06 | 0.48 | 0.00 | 0.46 | 0.93 | 0.00 | 0.00 | 0.07 | 0.00 | 0.00 |
| U.S.             | <b>HN014</b> | HN014 | 1.00 | 0.00 | 0.00 | 0.00 | 1.00 | 0.00 | 0.00 | 1.00 | 0.00 | 0.00 | 0.00 | 0.16 | 0.00 | 0.84 | 1.00 | 0.00 | 0.00 | 0.00 | 0.00 | 0.00 |
| U.S.             | <b>HN001</b> | HN001 | 1.00 | 0.01 | 0.03 | 0.00 | 0.97 | 0.00 | 0.00 | 0.97 | 0.03 | 0.00 | 0.00 | 0.25 | 0.00 | 0.75 | 0.97 | 0.00 | 0.00 | 0.03 | 0.00 | 0.00 |
| U.S.             | <b>HN100</b> | HN100 | 1.00 | 0.00 | 0.00 | 0.00 | 1.00 | 0.00 | 0.00 | 1.00 | 0.00 | 0.00 | 0.00 | 0.44 | 0.00 | 0.56 | 1.00 | 0.00 | 0.00 | 0.00 | 0.00 | 0.00 |
| U.S.             | <b>HN028</b> | HN028 | 1.00 | 0.00 | 0.00 | 0.00 | 1.00 | 0.00 | 0.00 | 1.00 | 0.00 | 0.00 | 0.00 | 0.36 | 0.00 | 0.64 | 1.00 | 0.00 | 0.00 | 0.00 | 0.00 | 0.00 |
| Former<br>Serbia | <b>HN064</b> | HN064 | 0.86 | 0.14 | 0.17 | 0.00 | 0.83 | 0.00 | 0.00 | 0.83 | 0.17 | 0.00 | 0.15 | 0.22 | 0.00 | 0.63 | 0.83 | 0.00 | 0.00 | 0.17 | 0.00 | 0.00 |
| U.S.             | <b>HN070</b> | HN070 | 0.97 | 0.03 | 0.05 | 0.00 | 0.95 | 0.00 | 0.00 | 0.95 | 0.05 | 0.00 | 0.03 | 0.20 | 0.00 | 0.77 | 0.95 | 0.00 | 0.00 | 0.05 | 0.00 | 0.00 |
| China            | <b>HN062</b> | HN062 | 0.96 | 0.04 | 0.06 | 0.00 | 0.94 | 0.00 | 0.00 | 0.94 | 0.06 | 0.00 | 0.04 | 0.20 | 0.00 | 0.75 | 0.94 | 0.00 | 0.00 | 0.06 | 0.00 | 0.00 |
| China            | <b>HN081</b> | HN081 | 0.81 | 0.19 | 0.23 | 0.00 | 0.77 | 0.00 | 0.00 | 0.77 | 0.23 | 0.00 | 0.19 | 0.09 | 0.00 | 0.72 | 0.77 | 0.00 | 0.00 | 0.23 | 0.00 | 0.00 |
| U.S.             | <b>HN092</b> | HN092 | 0.96 | 0.04 | 0.07 | 0.00 | 0.93 | 0.00 | 0.00 | 0.93 | 0.07 | 0.00 | 0.03 | 0.00 | 0.00 | 0.97 | 0.93 | 0.00 | 0.00 | 0.07 | 0.00 | 0.00 |
| N/A              | <b>HN101</b> | HN101 | 0.93 | 0.07 | 0.10 | 0.00 | 0.90 | 0.00 | 0.00 | 0.90 | 0.10 | 0.00 | 0.07 | 0.07 | 0.00 | 0.87 | 0.89 | 0.00 | 0.00 | 0.11 | 0.00 | 0.00 |
| U.S.             | <b>HN030</b> | HN030 | 1.00 | 0.00 | 0.01 | 0.00 | 0.99 | 0.00 | 0.00 | 0.99 | 0.01 | 0.00 | 0.00 | 0.00 | 0.00 | 1.00 | 0.99 | 0.00 | 0.00 | 0.02 | 0.00 | 0.00 |
| U.S.             | <b>HN099</b> | HN099 | 0.99 | 0.01 | 0.04 | 0.00 | 0.96 | 0.00 | 0.00 | 0.96 | 0.04 | 0.00 | 0.00 | 0.00 | 0.00 | 1.00 | 0.96 | 0.00 | 0.00 | 0.04 | 0.00 | 0.00 |
| U.S.             | <b>HN073</b> | HN073 | 1.00 | 0.00 | 0.00 | 0.00 | 1.00 | 0.00 | 0.00 | 1.00 | 0.00 | 0.00 | 0.00 | 0.00 | 0.00 | 1.00 | 1.00 | 0.00 | 0.00 | 0.00 | 0.00 | 0.00 |
| N/A              | <b>HN088</b> | HN088 | 1.00 | 0.00 | 0.00 | 0.00 | 1.00 | 0.00 | 0.00 | 1.00 | 0.00 | 0.00 | 0.00 | 0.00 | 0.00 | 1.00 | 1.00 | 0.00 | 0.00 | 0.00 | 0.00 | 0.00 |
| U.S.             | <b>HN102</b> | HN102 | 1.00 | 0.00 | 0.01 | 0.00 | 0.99 | 0.00 | 0.00 | 0.99 | 0.01 | 0.00 | 0.00 | 0.12 | 0.00 | 0.88 | 0.99 | 0.00 | 0.00 | 0.01 | 0.00 | 0.00 |
| U.S.             | <b>HN029</b> | HN029 | 1.00 | 0.00 | 0.00 | 0.00 | 1.00 | 0.00 | 0.00 | 1.00 | 0.00 | 0.00 | 0.00 | 0.00 | 0.00 | 1.00 | 1.00 | 0.00 | 0.00 | 0.00 | 0.00 | 0.00 |
| U.S.             | <b>HN066</b> | HN066 | 1.00 | 0.00 | 0.00 | 0.00 | 1.00 | 0.00 | 0.00 | 1.00 | 0.00 | 0.00 | 0.00 | 0.00 | 0.00 | 1.00 | 1.00 | 0.00 | 0.00 | 0.00 | 0.00 | 0.00 |
| U.S.             | <b>HN087</b> | HN087 | 1.00 | 0.00 | 0.00 | 0.00 | 1.00 | 0.00 | 0.00 | 1.00 | 0.00 | 0.00 | 0.00 | 0.00 | 0.00 | 1.00 | 1.00 | 0.00 | 0.00 | 0.00 | 0.00 | 0.00 |
| U.S.             | <b>HN065</b> | HN065 | 1.00 | 0.00 | 0.00 | 0.00 | 1.00 | 0.00 | 0.00 | 1.00 | 0.00 | 0.00 | 0.00 | 0.00 | 0.00 | 1.00 | 1.00 | 0.00 | 0.00 | 0.00 | 0.00 | 0.00 |

**Supplementary Table 8. Distribution of LD blocks in three soybean gene pools.**

| Distance(bp) | Landrace | Elite  | Wild   | Distance(bp) | Landrace | Elite  | Wild   |
|--------------|----------|--------|--------|--------------|----------|--------|--------|
| 3            | 0.4371   | 0.4594 | 0.4017 | 124110       | 0.2086   | 0.2039 | 0.1644 |
| 4            | 0.4168   | 0.4369 | 0.3862 | 124310       | 0.2083   | 0.2036 | 0.1642 |
| 5            | 0.4196   | 0.4358 | 0.3809 | 124510       | 0.2082   | 0.2037 | 0.1641 |
| 6            | 0.4098   | 0.4259 | 0.3752 | 124710       | 0.2085   | 0.2037 | 0.1642 |
| 7            | 0.4106   | 0.4286 | 0.3720 | 124910       | 0.2080   | 0.2032 | 0.1642 |
| 8            | 0.4072   | 0.4236 | 0.3684 | 125110       | 0.2080   | 0.2031 | 0.1641 |
| 9            | 0.4076   | 0.4238 | 0.3677 | 125310       | 0.2080   | 0.2035 | 0.1641 |
| 10           | 0.4051   | 0.4207 | 0.3653 | 125510       | 0.2081   | 0.2030 | 0.1642 |
| 110          | 0.3981   | 0.4163 | 0.3489 | 125710       | 0.2080   | 0.2032 | 0.1642 |
| 310          | 0.3867   | 0.4040 | 0.3335 | 125910       | 0.2077   | 0.2031 | 0.1640 |
| 510          | 0.3809   | 0.3979 | 0.3264 | 126110       | 0.2077   | 0.2030 | 0.1642 |
| 710          | 0.3763   | 0.3929 | 0.3206 | 126310       | 0.2076   | 0.2029 | 0.1640 |
| 910          | 0.3734   | 0.3897 | 0.3164 | 126510       | 0.2073   | 0.2031 | 0.1639 |
| 1110         | 0.3703   | 0.3859 | 0.3125 | 126710       | 0.2073   | 0.2031 | 0.1640 |
| 1310         | 0.3676   | 0.3829 | 0.3084 | 126910       | 0.2074   | 0.2029 | 0.1638 |
| 1510         | 0.3653   | 0.3802 | 0.3053 | 127110       | 0.2071   | 0.2030 | 0.1638 |
| 1710         | 0.3628   | 0.3774 | 0.3022 | 127310       | 0.2072   | 0.2024 | 0.1637 |
| 1910         | 0.3605   | 0.3745 | 0.2991 | 127510       | 0.2069   | 0.2025 | 0.1637 |
| 2110         | 0.3590   | 0.3725 | 0.2966 | 127710       | 0.2070   | 0.2024 | 0.1636 |
| 2310         | 0.3568   | 0.3704 | 0.2940 | 127910       | 0.2070   | 0.2024 | 0.1636 |
| 2510         | 0.3548   | 0.3683 | 0.2914 | 128110       | 0.2068   | 0.2022 | 0.1637 |
| 2710         | 0.3527   | 0.3660 | 0.2890 | 128310       | 0.2068   | 0.2022 | 0.1636 |
| 2910         | 0.3514   | 0.3641 | 0.2868 | 128510       | 0.2066   | 0.2021 | 0.1636 |
| 3110         | 0.3494   | 0.3620 | 0.2844 | 128710       | 0.2065   | 0.2021 | 0.1635 |
| 3310         | 0.3478   | 0.3601 | 0.2823 | 128910       | 0.2066   | 0.2021 | 0.1635 |
| 3510         | 0.3461   | 0.3582 | 0.2803 | 129110       | 0.2063   | 0.2017 | 0.1634 |
| 3710         | 0.3445   | 0.3564 | 0.2782 | 129310       | 0.2063   | 0.2018 | 0.1634 |
| 3910         | 0.3435   | 0.3552 | 0.2763 | 129510       | 0.2065   | 0.2018 | 0.1634 |
| 4110         | 0.3420   | 0.3534 | 0.2746 | 129710       | 0.2062   | 0.2017 | 0.1634 |
| 4310         | 0.3405   | 0.3514 | 0.2727 | 129910       | 0.2062   | 0.2015 | 0.1632 |
| 4510         | 0.3391   | 0.3499 | 0.2710 | 130110       | 0.2061   | 0.2016 | 0.1631 |
| 4710         | 0.3375   | 0.3480 | 0.2692 | 130310       | 0.2061   | 0.2014 | 0.1631 |
| 4910         | 0.3363   | 0.3469 | 0.2677 | 130510       | 0.2061   | 0.2011 | 0.1630 |
| 5110         | 0.3350   | 0.3455 | 0.2661 | 130710       | 0.2059   | 0.2014 | 0.1630 |
| 5310         | 0.3338   | 0.3437 | 0.2646 | 130910       | 0.2057   | 0.2012 | 0.1629 |
| 5510         | 0.3329   | 0.3427 | 0.2632 | 131110       | 0.2055   | 0.2010 | 0.1629 |
| 5710         | 0.3317   | 0.3412 | 0.2617 | 131310       | 0.2056   | 0.2010 | 0.1629 |
| 5910         | 0.3303   | 0.3395 | 0.2602 | 131510       | 0.2057   | 0.2010 | 0.1629 |
| 6110         | 0.3292   | 0.3387 | 0.2588 | 131710       | 0.2054   | 0.2009 | 0.1628 |
| 6310         | 0.3283   | 0.3371 | 0.2577 | 131910       | 0.2054   | 0.2009 | 0.1627 |
| 6510         | 0.3272   | 0.3358 | 0.2562 | 132110       | 0.2051   | 0.2005 | 0.1627 |
| 6710         | 0.3259   | 0.3346 | 0.2550 | 132310       | 0.2050   | 0.2004 | 0.1626 |
| 6910         | 0.3254   | 0.3335 | 0.2540 | 132510       | 0.2053   | 0.2004 | 0.1626 |
| 7110         | 0.3240   | 0.3325 | 0.2527 | 132710       | 0.2048   | 0.2004 | 0.1626 |
| 7310         | 0.3231   | 0.3313 | 0.2517 | 132910       | 0.2051   | 0.2004 | 0.1627 |
| 7510         | 0.3223   | 0.3303 | 0.2506 | 133110       | 0.2050   | 0.2002 | 0.1625 |
| 7710         | 0.3214   | 0.3292 | 0.2494 | 133310       | 0.2046   | 0.2001 | 0.1626 |
| 7910         | 0.3204   | 0.3282 | 0.2482 | 133510       | 0.2046   | 0.2001 | 0.1624 |
| 8110         | 0.3198   | 0.3271 | 0.2472 | 133710       | 0.2044   | 0.2001 | 0.1624 |
| 8310         | 0.3187   | 0.3261 | 0.2462 | 133910       | 0.2045   | 0.2002 | 0.1625 |
| 8510         | 0.3179   | 0.3248 | 0.2450 | 134110       | 0.2046   | 0.2002 | 0.1625 |

|       |        |        |        |        |        |        |        |
|-------|--------|--------|--------|--------|--------|--------|--------|
| 8710  | 0.3167 | 0.3237 | 0.2439 | 134310 | 0.2047 | 0.1999 | 0.1623 |
| 8910  | 0.3160 | 0.3229 | 0.2431 | 134510 | 0.2048 | 0.1999 | 0.1622 |
| 9110  | 0.3151 | 0.3220 | 0.2422 | 134710 | 0.2044 | 0.1997 | 0.1623 |
| 9310  | 0.3143 | 0.3211 | 0.2413 | 134910 | 0.2043 | 0.1997 | 0.1623 |
| 9510  | 0.3136 | 0.3202 | 0.2405 | 135110 | 0.2044 | 0.1997 | 0.1623 |
| 9710  | 0.3132 | 0.3194 | 0.2394 | 135310 | 0.2041 | 0.1995 | 0.1622 |
| 9910  | 0.3122 | 0.3187 | 0.2388 | 135510 | 0.2040 | 0.1992 | 0.1622 |
| 10110 | 0.3116 | 0.3177 | 0.2379 | 135710 | 0.2039 | 0.1992 | 0.1620 |
| 10310 | 0.3105 | 0.3165 | 0.2367 | 135910 | 0.2040 | 0.1991 | 0.1621 |
| 10510 | 0.3099 | 0.3160 | 0.2359 | 136110 | 0.2039 | 0.1990 | 0.1622 |
| 10710 | 0.3093 | 0.3150 | 0.2351 | 136310 | 0.2037 | 0.1987 | 0.1620 |
| 10910 | 0.3084 | 0.3144 | 0.2345 | 136510 | 0.2039 | 0.1989 | 0.1620 |
| 11110 | 0.3078 | 0.3137 | 0.2340 | 136710 | 0.2039 | 0.1988 | 0.1620 |
| 11310 | 0.3072 | 0.3127 | 0.2331 | 136910 | 0.2038 | 0.1988 | 0.1620 |
| 11510 | 0.3064 | 0.3121 | 0.2324 | 137110 | 0.2036 | 0.1986 | 0.1618 |
| 11710 | 0.3058 | 0.3112 | 0.2317 | 137310 | 0.2037 | 0.1985 | 0.1618 |
| 11910 | 0.3052 | 0.3106 | 0.2309 | 137510 | 0.2035 | 0.1985 | 0.1618 |
| 12110 | 0.3044 | 0.3098 | 0.2304 | 137710 | 0.2033 | 0.1984 | 0.1617 |
| 12310 | 0.3040 | 0.3091 | 0.2297 | 137910 | 0.2033 | 0.1981 | 0.1618 |
| 12510 | 0.3035 | 0.3082 | 0.2290 | 138110 | 0.2033 | 0.1981 | 0.1616 |
| 12710 | 0.3027 | 0.3078 | 0.2287 | 138310 | 0.2032 | 0.1981 | 0.1617 |
| 12910 | 0.3023 | 0.3074 | 0.2280 | 138510 | 0.2030 | 0.1980 | 0.1616 |
| 13110 | 0.3020 | 0.3065 | 0.2275 | 138710 | 0.2031 | 0.1982 | 0.1617 |
| 13310 | 0.3012 | 0.3060 | 0.2267 | 138910 | 0.2028 | 0.1983 | 0.1617 |
| 13510 | 0.3006 | 0.3051 | 0.2261 | 139110 | 0.2029 | 0.1982 | 0.1617 |
| 13710 | 0.3003 | 0.3043 | 0.2256 | 139310 | 0.2029 | 0.1984 | 0.1618 |
| 13910 | 0.2993 | 0.3038 | 0.2248 | 139510 | 0.2032 | 0.1982 | 0.1617 |
| 14110 | 0.2988 | 0.3032 | 0.2244 | 139710 | 0.2026 | 0.1978 | 0.1616 |
| 14310 | 0.2982 | 0.3025 | 0.2239 | 139910 | 0.2023 | 0.1977 | 0.1616 |
| 14510 | 0.2979 | 0.3019 | 0.2234 | 140110 | 0.2025 | 0.1978 | 0.1615 |
| 14710 | 0.2974 | 0.3013 | 0.2226 | 140310 | 0.2027 | 0.1980 | 0.1615 |
| 14910 | 0.2967 | 0.3007 | 0.2219 | 140510 | 0.2023 | 0.1975 | 0.1615 |
| 15110 | 0.2961 | 0.3001 | 0.2214 | 140710 | 0.2023 | 0.1976 | 0.1614 |
| 15310 | 0.2957 | 0.2994 | 0.2209 | 140910 | 0.2022 | 0.1974 | 0.1615 |
| 15510 | 0.2952 | 0.2994 | 0.2204 | 141110 | 0.2019 | 0.1972 | 0.1612 |
| 15710 | 0.2949 | 0.2987 | 0.2199 | 141310 | 0.2019 | 0.1975 | 0.1612 |
| 15910 | 0.2944 | 0.2981 | 0.2194 | 141510 | 0.2018 | 0.1970 | 0.1610 |
| 16110 | 0.2939 | 0.2977 | 0.2191 | 141710 | 0.2016 | 0.1970 | 0.1611 |
| 16310 | 0.2937 | 0.2972 | 0.2185 | 141910 | 0.2017 | 0.1969 | 0.1612 |
| 16510 | 0.2935 | 0.2965 | 0.2180 | 142110 | 0.2016 | 0.1969 | 0.1611 |
| 16710 | 0.2930 | 0.2959 | 0.2176 | 142310 | 0.2015 | 0.1968 | 0.1611 |
| 16910 | 0.2923 | 0.2950 | 0.2169 | 142510 | 0.2015 | 0.1970 | 0.1611 |
| 17110 | 0.2919 | 0.2946 | 0.2166 | 142710 | 0.2016 | 0.1971 | 0.1611 |
| 17310 | 0.2913 | 0.2940 | 0.2163 | 142910 | 0.2014 | 0.1966 | 0.1610 |
| 17510 | 0.2908 | 0.2935 | 0.2159 | 143110 | 0.2016 | 0.1965 | 0.1610 |
| 17710 | 0.2903 | 0.2928 | 0.2152 | 143310 | 0.2013 | 0.1964 | 0.1609 |
| 17910 | 0.2901 | 0.2925 | 0.2147 | 143510 | 0.2014 | 0.1964 | 0.1607 |
| 18110 | 0.2896 | 0.2919 | 0.2144 | 143710 | 0.2013 | 0.1964 | 0.1609 |
| 18310 | 0.2891 | 0.2914 | 0.2141 | 143910 | 0.2012 | 0.1965 | 0.1608 |
| 18510 | 0.2888 | 0.2908 | 0.2136 | 144110 | 0.2014 | 0.1964 | 0.1610 |
| 18710 | 0.2883 | 0.2903 | 0.2130 | 144310 | 0.2012 | 0.1961 | 0.1609 |
| 18910 | 0.2879 | 0.2900 | 0.2127 | 144510 | 0.2012 | 0.1961 | 0.1609 |
| 19110 | 0.2875 | 0.2893 | 0.2126 | 144710 | 0.2011 | 0.1959 | 0.1608 |
| 19310 | 0.2869 | 0.2888 | 0.2118 | 144910 | 0.2015 | 0.1962 | 0.1609 |

|       |        |        |        |        |        |        |        |
|-------|--------|--------|--------|--------|--------|--------|--------|
| 19510 | 0.2867 | 0.2888 | 0.2115 | 145110 | 0.2012 | 0.1959 | 0.1608 |
| 19710 | 0.2861 | 0.2880 | 0.2112 | 145310 | 0.2010 | 0.1959 | 0.1607 |
| 19910 | 0.2857 | 0.2876 | 0.2108 | 145510 | 0.2009 | 0.1958 | 0.1607 |
| 20110 | 0.2855 | 0.2872 | 0.2102 | 145710 | 0.2007 | 0.1956 | 0.1606 |
| 20310 | 0.2854 | 0.2867 | 0.2101 | 145910 | 0.2009 | 0.1957 | 0.1607 |
| 20510 | 0.2847 | 0.2866 | 0.2097 | 146110 | 0.2008 | 0.1957 | 0.1606 |
| 20710 | 0.2844 | 0.2859 | 0.2095 | 146310 | 0.2008 | 0.1954 | 0.1605 |
| 20910 | 0.2837 | 0.2854 | 0.2093 | 146510 | 0.2008 | 0.1957 | 0.1607 |
| 21110 | 0.2837 | 0.2853 | 0.2090 | 146710 | 0.2003 | 0.1952 | 0.1605 |
| 21310 | 0.2832 | 0.2848 | 0.2087 | 146910 | 0.2004 | 0.1954 | 0.1604 |
| 21510 | 0.2832 | 0.2844 | 0.2084 | 147110 | 0.2003 | 0.1953 | 0.1604 |
| 21710 | 0.2827 | 0.2839 | 0.2080 | 147310 | 0.2003 | 0.1954 | 0.1605 |
| 21910 | 0.2821 | 0.2835 | 0.2075 | 147510 | 0.2004 | 0.1951 | 0.1604 |
| 22110 | 0.2821 | 0.2833 | 0.2073 | 147710 | 0.2003 | 0.1950 | 0.1603 |
| 22310 | 0.2819 | 0.2830 | 0.2071 | 147910 | 0.2000 | 0.1945 | 0.1603 |
| 22510 | 0.2814 | 0.2828 | 0.2069 | 148110 | 0.1998 | 0.1945 | 0.1602 |
| 22710 | 0.2811 | 0.2823 | 0.2066 | 148310 | 0.1998 | 0.1947 | 0.1601 |
| 22910 | 0.2808 | 0.2820 | 0.2061 | 148510 | 0.1999 | 0.1948 | 0.1602 |
| 23110 | 0.2804 | 0.2812 | 0.2059 | 148710 | 0.1998 | 0.1950 | 0.1602 |
| 23310 | 0.2798 | 0.2810 | 0.2056 | 148910 | 0.1997 | 0.1947 | 0.1601 |
| 23510 | 0.2798 | 0.2810 | 0.2054 | 149110 | 0.1995 | 0.1944 | 0.1602 |
| 23710 | 0.2796 | 0.2807 | 0.2051 | 149310 | 0.1997 | 0.1947 | 0.1603 |
| 23910 | 0.2791 | 0.2802 | 0.2047 | 149510 | 0.1994 | 0.1945 | 0.1602 |
| 24110 | 0.2791 | 0.2798 | 0.2046 | 149710 | 0.1994 | 0.1944 | 0.1602 |
| 24310 | 0.2786 | 0.2796 | 0.2041 | 149910 | 0.1995 | 0.1945 | 0.1600 |
| 24510 | 0.2779 | 0.2789 | 0.2040 | 150110 | 0.1995 | 0.1944 | 0.1600 |
| 24710 | 0.2781 | 0.2786 | 0.2036 | 150310 | 0.1995 | 0.1944 | 0.1600 |
| 24910 | 0.2777 | 0.2781 | 0.2034 | 150510 | 0.1991 | 0.1941 | 0.1599 |
| 25110 | 0.2773 | 0.2778 | 0.2029 | 150710 | 0.1990 | 0.1940 | 0.1599 |
| 25310 | 0.2775 | 0.2775 | 0.2028 | 150910 | 0.1991 | 0.1939 | 0.1599 |
| 25510 | 0.2770 | 0.2774 | 0.2026 | 151110 | 0.1986 | 0.1939 | 0.1598 |
| 25710 | 0.2766 | 0.2765 | 0.2021 | 151310 | 0.1986 | 0.1937 | 0.1597 |
| 25910 | 0.2762 | 0.2764 | 0.2021 | 151510 | 0.1985 | 0.1937 | 0.1597 |
| 26110 | 0.2759 | 0.2762 | 0.2017 | 151710 | 0.1987 | 0.1938 | 0.1599 |
| 26310 | 0.2754 | 0.2758 | 0.2014 | 151910 | 0.1985 | 0.1937 | 0.1598 |
| 26510 | 0.2751 | 0.2753 | 0.2010 | 152110 | 0.1985 | 0.1934 | 0.1598 |
| 26710 | 0.2748 | 0.2750 | 0.2011 | 152310 | 0.1986 | 0.1935 | 0.1598 |
| 26910 | 0.2746 | 0.2747 | 0.2008 | 152510 | 0.1985 | 0.1935 | 0.1597 |
| 27110 | 0.2743 | 0.2745 | 0.2007 | 152710 | 0.1983 | 0.1935 | 0.1600 |
| 27310 | 0.2745 | 0.2744 | 0.2003 | 152910 | 0.1983 | 0.1934 | 0.1597 |
| 27510 | 0.2742 | 0.2742 | 0.2001 | 153110 | 0.1980 | 0.1931 | 0.1598 |
| 27710 | 0.2738 | 0.2735 | 0.1999 | 153310 | 0.1981 | 0.1931 | 0.1599 |
| 27910 | 0.2734 | 0.2731 | 0.1996 | 153510 | 0.1978 | 0.1931 | 0.1598 |
| 28110 | 0.2732 | 0.2732 | 0.1995 | 153710 | 0.1980 | 0.1932 | 0.1597 |
| 28310 | 0.2730 | 0.2728 | 0.1992 | 153910 | 0.1981 | 0.1932 | 0.1598 |
| 28510 | 0.2722 | 0.2720 | 0.1990 | 154110 | 0.1978 | 0.1929 | 0.1597 |
| 28710 | 0.2723 | 0.2717 | 0.1985 | 154310 | 0.1977 | 0.1927 | 0.1597 |
| 28910 | 0.2719 | 0.2716 | 0.1986 | 154510 | 0.1979 | 0.1928 | 0.1597 |
| 29110 | 0.2715 | 0.2711 | 0.1982 | 154710 | 0.1976 | 0.1927 | 0.1597 |
| 29310 | 0.2715 | 0.2710 | 0.1980 | 154910 | 0.1979 | 0.1928 | 0.1596 |
| 29510 | 0.2714 | 0.2709 | 0.1980 | 155110 | 0.1978 | 0.1926 | 0.1598 |
| 29710 | 0.2712 | 0.2704 | 0.1977 | 155310 | 0.1978 | 0.1928 | 0.1596 |
| 29910 | 0.2709 | 0.2700 | 0.1975 | 155510 | 0.1974 | 0.1927 | 0.1596 |
| 30110 | 0.2708 | 0.2700 | 0.1974 | 155710 | 0.1975 | 0.1925 | 0.1596 |



|       |        |        |        |        |        |        |        |
|-------|--------|--------|--------|--------|--------|--------|--------|
| 30310 | 0.2702 | 0.2696 | 0.1971 | 155910 | 0.1975 | 0.1925 | 0.1598 |
| 30510 | 0.2700 | 0.2693 | 0.1969 | 156110 | 0.1971 | 0.1921 | 0.1595 |
| 30710 | 0.2697 | 0.2693 | 0.1968 | 156310 | 0.1975 | 0.1922 | 0.1597 |
| 30910 | 0.2691 | 0.2687 | 0.1965 | 156510 | 0.1970 | 0.1923 | 0.1597 |
| 31110 | 0.2691 | 0.2685 | 0.1964 | 156710 | 0.1972 | 0.1924 | 0.1595 |
| 31310 | 0.2689 | 0.2681 | 0.1963 | 156910 | 0.1975 | 0.1923 | 0.1595 |
| 31510 | 0.2686 | 0.2678 | 0.1961 | 157110 | 0.1972 | 0.1921 | 0.1595 |
| 31710 | 0.2686 | 0.2675 | 0.1958 | 157310 | 0.1970 | 0.1919 | 0.1594 |
| 31910 | 0.2682 | 0.2674 | 0.1957 | 157510 | 0.1969 | 0.1920 | 0.1595 |
| 32110 | 0.2676 | 0.2669 | 0.1953 | 157710 | 0.1966 | 0.1916 | 0.1594 |
| 32310 | 0.2677 | 0.2671 | 0.1953 | 157910 | 0.1969 | 0.1916 | 0.1595 |
| 32510 | 0.2674 | 0.2666 | 0.1952 | 158110 | 0.1966 | 0.1915 | 0.1595 |
| 32710 | 0.2673 | 0.2666 | 0.1949 | 158310 | 0.1968 | 0.1917 | 0.1594 |
| 32910 | 0.2672 | 0.2664 | 0.1948 | 158510 | 0.1966 | 0.1915 | 0.1593 |
| 33110 | 0.2670 | 0.2661 | 0.1947 | 158710 | 0.1967 | 0.1914 | 0.1593 |
| 33310 | 0.2664 | 0.2655 | 0.1944 | 158910 | 0.1964 | 0.1911 | 0.1592 |
| 33510 | 0.2661 | 0.2654 | 0.1942 | 159110 | 0.1966 | 0.1914 | 0.1593 |
| 33710 | 0.2659 | 0.2653 | 0.1942 | 159310 | 0.1965 | 0.1914 | 0.1594 |
| 33910 | 0.2660 | 0.2649 | 0.1939 | 159510 | 0.1964 | 0.1913 | 0.1594 |
| 34110 | 0.2655 | 0.2648 | 0.1938 | 159710 | 0.1963 | 0.1912 | 0.1593 |
| 34310 | 0.2653 | 0.2645 | 0.1935 | 159910 | 0.1965 | 0.1913 | 0.1593 |
| 34510 | 0.2652 | 0.2642 | 0.1934 | 160110 | 0.1963 | 0.1913 | 0.1593 |
| 34710 | 0.2649 | 0.2640 | 0.1932 | 160310 | 0.1960 | 0.1912 | 0.1593 |
| 34910 | 0.2650 | 0.2636 | 0.1934 | 160510 | 0.1960 | 0.1910 | 0.1592 |
| 35110 | 0.2645 | 0.2634 | 0.1931 | 160710 | 0.1963 | 0.1910 | 0.1592 |
| 35310 | 0.2643 | 0.2635 | 0.1927 | 160910 | 0.1962 | 0.1911 | 0.1592 |
| 35510 | 0.2643 | 0.2630 | 0.1928 | 161110 | 0.1962 | 0.1910 | 0.1592 |
| 35710 | 0.2639 | 0.2626 | 0.1926 | 161310 | 0.1960 | 0.1909 | 0.1591 |
| 35910 | 0.2637 | 0.2622 | 0.1926 | 161510 | 0.1961 | 0.1911 | 0.1590 |
| 36110 | 0.2634 | 0.2618 | 0.1922 | 161710 | 0.1960 | 0.1907 | 0.1590 |
| 36310 | 0.2630 | 0.2614 | 0.1920 | 161910 | 0.1959 | 0.1905 | 0.1589 |
| 36510 | 0.2631 | 0.2615 | 0.1920 | 162110 | 0.1957 | 0.1907 | 0.1589 |
| 36710 | 0.2628 | 0.2614 | 0.1917 | 162310 | 0.1960 | 0.1907 | 0.1589 |
| 36910 | 0.2626 | 0.2611 | 0.1916 | 162510 | 0.1958 | 0.1905 | 0.1590 |
| 37110 | 0.2623 | 0.2607 | 0.1914 | 162710 | 0.1958 | 0.1906 | 0.1589 |
| 37310 | 0.2621 | 0.2607 | 0.1912 | 162910 | 0.1953 | 0.1904 | 0.1588 |
| 37510 | 0.2619 | 0.2604 | 0.1911 | 163110 | 0.1955 | 0.1903 | 0.1588 |
| 37710 | 0.2617 | 0.2600 | 0.1911 | 163310 | 0.1954 | 0.1902 | 0.1588 |
| 37910 | 0.2615 | 0.2598 | 0.1908 | 163510 | 0.1955 | 0.1904 | 0.1587 |
| 38110 | 0.2611 | 0.2595 | 0.1907 | 163710 | 0.1955 | 0.1903 | 0.1589 |
| 38310 | 0.2610 | 0.2594 | 0.1905 | 163910 | 0.1955 | 0.1903 | 0.1587 |
| 38510 | 0.2605 | 0.2589 | 0.1902 | 164110 | 0.1954 | 0.1904 | 0.1587 |
| 38710 | 0.2605 | 0.2588 | 0.1899 | 164310 | 0.1954 | 0.1903 | 0.1587 |
| 38910 | 0.2605 | 0.2583 | 0.1897 | 164510 | 0.1951 | 0.1902 | 0.1586 |
| 39110 | 0.2605 | 0.2586 | 0.1899 | 164710 | 0.1953 | 0.1900 | 0.1586 |
| 39310 | 0.2598 | 0.2578 | 0.1896 | 164910 | 0.1953 | 0.1901 | 0.1586 |
| 39510 | 0.2597 | 0.2575 | 0.1894 | 165110 | 0.1951 | 0.1900 | 0.1585 |
| 39710 | 0.2596 | 0.2575 | 0.1894 | 165310 | 0.1949 | 0.1896 | 0.1585 |
| 39910 | 0.2592 | 0.2570 | 0.1893 | 165510 | 0.1948 | 0.1897 | 0.1586 |
| 40110 | 0.2593 | 0.2570 | 0.1891 | 165710 | 0.1948 | 0.1895 | 0.1585 |
| 40310 | 0.2588 | 0.2565 | 0.1888 | 165910 | 0.1945 | 0.1894 | 0.1585 |
| 40510 | 0.2586 | 0.2562 | 0.1887 | 166110 | 0.1948 | 0.1896 | 0.1586 |
| 40710 | 0.2584 | 0.2560 | 0.1886 | 166310 | 0.1944 | 0.1894 | 0.1584 |
| 40910 | 0.2581 | 0.2559 | 0.1885 | 166510 | 0.1945 | 0.1895 | 0.1585 |

|       |        |        |        |        |        |        |        |
|-------|--------|--------|--------|--------|--------|--------|--------|
| 41110 | 0.2579 | 0.2555 | 0.1882 | 166710 | 0.1946 | 0.1892 | 0.1584 |
| 41310 | 0.2582 | 0.2557 | 0.1883 | 166910 | 0.1945 | 0.1892 | 0.1584 |
| 41510 | 0.2579 | 0.2553 | 0.1882 | 167110 | 0.1942 | 0.1889 | 0.1585 |
| 41710 | 0.2574 | 0.2550 | 0.1878 | 167310 | 0.1943 | 0.1892 | 0.1583 |
| 41910 | 0.2577 | 0.2551 | 0.1878 | 167510 | 0.1943 | 0.1891 | 0.1585 |
| 42110 | 0.2573 | 0.2545 | 0.1876 | 167710 | 0.1939 | 0.1887 | 0.1583 |
| 42310 | 0.2569 | 0.2545 | 0.1876 | 167910 | 0.1938 | 0.1888 | 0.1583 |
| 42510 | 0.2567 | 0.2544 | 0.1874 | 168110 | 0.1937 | 0.1888 | 0.1583 |
| 42710 | 0.2563 | 0.2540 | 0.1871 | 168310 | 0.1938 | 0.1889 | 0.1584 |
| 42910 | 0.2562 | 0.2535 | 0.1870 | 168510 | 0.1936 | 0.1888 | 0.1583 |
| 43110 | 0.2562 | 0.2534 | 0.1871 | 168710 | 0.1938 | 0.1888 | 0.1584 |
| 43310 | 0.2558 | 0.2531 | 0.1868 | 168910 | 0.1936 | 0.1887 | 0.1582 |
| 43510 | 0.2559 | 0.2529 | 0.1866 | 169110 | 0.1936 | 0.1889 | 0.1582 |
| 43710 | 0.2556 | 0.2528 | 0.1867 | 169310 | 0.1933 | 0.1884 | 0.1581 |
| 43910 | 0.2555 | 0.2527 | 0.1865 | 169510 | 0.1935 | 0.1886 | 0.1581 |
| 44110 | 0.2553 | 0.2524 | 0.1864 | 169710 | 0.1938 | 0.1886 | 0.1582 |
| 44310 | 0.2552 | 0.2520 | 0.1865 | 169910 | 0.1934 | 0.1885 | 0.1583 |
| 44510 | 0.2551 | 0.2520 | 0.1864 | 170110 | 0.1934 | 0.1883 | 0.1582 |
| 44710 | 0.2548 | 0.2520 | 0.1863 | 170310 | 0.1934 | 0.1881 | 0.1583 |
| 44910 | 0.2548 | 0.2517 | 0.1861 | 170510 | 0.1934 | 0.1883 | 0.1581 |
| 45110 | 0.2543 | 0.2514 | 0.1859 | 170710 | 0.1931 | 0.1881 | 0.1580 |
| 45310 | 0.2543 | 0.2514 | 0.1859 | 170910 | 0.1932 | 0.1882 | 0.1579 |
| 45510 | 0.2542 | 0.2510 | 0.1858 | 171110 | 0.1932 | 0.1878 | 0.1578 |
| 45710 | 0.2541 | 0.2509 | 0.1856 | 171310 | 0.1931 | 0.1880 | 0.1579 |
| 45910 | 0.2537 | 0.2505 | 0.1854 | 171510 | 0.1931 | 0.1879 | 0.1579 |
| 46110 | 0.2534 | 0.2503 | 0.1853 | 171710 | 0.1929 | 0.1880 | 0.1579 |
| 46310 | 0.2535 | 0.2502 | 0.1854 | 171910 | 0.1930 | 0.1879 | 0.1577 |
| 46510 | 0.2529 | 0.2500 | 0.1851 | 172110 | 0.1928 | 0.1876 | 0.1579 |
| 46710 | 0.2527 | 0.2497 | 0.1850 | 172310 | 0.1925 | 0.1875 | 0.1578 |
| 46910 | 0.2525 | 0.2495 | 0.1850 | 172510 | 0.1925 | 0.1875 | 0.1579 |
| 47110 | 0.2522 | 0.2492 | 0.1850 | 172710 | 0.1925 | 0.1877 | 0.1580 |
| 47310 | 0.2524 | 0.2492 | 0.1847 | 172910 | 0.1925 | 0.1875 | 0.1579 |
| 47510 | 0.2522 | 0.2489 | 0.1847 | 173110 | 0.1923 | 0.1874 | 0.1578 |
| 47710 | 0.2520 | 0.2490 | 0.1845 | 173310 | 0.1922 | 0.1874 | 0.1580 |
| 47910 | 0.2519 | 0.2488 | 0.1844 | 173510 | 0.1919 | 0.1870 | 0.1578 |
| 48110 | 0.2518 | 0.2486 | 0.1843 | 173710 | 0.1920 | 0.1872 | 0.1578 |
| 48310 | 0.2517 | 0.2484 | 0.1842 | 173910 | 0.1918 | 0.1871 | 0.1576 |
| 48510 | 0.2516 | 0.2480 | 0.1841 | 174110 | 0.1920 | 0.1872 | 0.1578 |
| 48710 | 0.2514 | 0.2477 | 0.1840 | 174310 | 0.1917 | 0.1868 | 0.1577 |
| 48910 | 0.2510 | 0.2476 | 0.1840 | 174510 | 0.1917 | 0.1870 | 0.1577 |
| 49110 | 0.2511 | 0.2474 | 0.1839 | 174710 | 0.1917 | 0.1869 | 0.1576 |
| 49310 | 0.2506 | 0.2471 | 0.1838 | 174910 | 0.1915 | 0.1865 | 0.1577 |
| 49510 | 0.2508 | 0.2471 | 0.1836 | 175110 | 0.1914 | 0.1868 | 0.1575 |
| 49710 | 0.2505 | 0.2471 | 0.1835 | 175310 | 0.1915 | 0.1870 | 0.1576 |
| 49910 | 0.2503 | 0.2468 | 0.1835 | 175510 | 0.1916 | 0.1869 | 0.1577 |
| 50110 | 0.2502 | 0.2466 | 0.1834 | 175710 | 0.1914 | 0.1867 | 0.1578 |
| 50310 | 0.2500 | 0.2465 | 0.1833 | 175910 | 0.1916 | 0.1866 | 0.1578 |
| 50510 | 0.2499 | 0.2461 | 0.1832 | 176110 | 0.1914 | 0.1867 | 0.1578 |
| 50710 | 0.2498 | 0.2460 | 0.1830 | 176310 | 0.1916 | 0.1866 | 0.1577 |
| 50910 | 0.2495 | 0.2459 | 0.1830 | 176510 | 0.1914 | 0.1863 | 0.1578 |
| 51110 | 0.2492 | 0.2453 | 0.1829 | 176710 | 0.1912 | 0.1865 | 0.1576 |
| 51310 | 0.2490 | 0.2454 | 0.1830 | 176910 | 0.1911 | 0.1865 | 0.1575 |
| 51510 | 0.2491 | 0.2455 | 0.1826 | 177110 | 0.1911 | 0.1863 | 0.1577 |
| 51710 | 0.2494 | 0.2457 | 0.1828 | 177310 | 0.1910 | 0.1863 | 0.1575 |

|       |        |        |        |        |        |        |        |
|-------|--------|--------|--------|--------|--------|--------|--------|
| 51910 | 0.2489 | 0.2450 | 0.1825 | 177510 | 0.1911 | 0.1866 | 0.1577 |
| 52110 | 0.2491 | 0.2450 | 0.1827 | 177710 | 0.1910 | 0.1863 | 0.1577 |
| 52310 | 0.2489 | 0.2451 | 0.1824 | 177910 | 0.1909 | 0.1862 | 0.1576 |
| 52510 | 0.2487 | 0.2450 | 0.1824 | 178110 | 0.1909 | 0.1863 | 0.1576 |
| 52710 | 0.2483 | 0.2443 | 0.1823 | 178310 | 0.1907 | 0.1860 | 0.1577 |
| 52910 | 0.2481 | 0.2440 | 0.1820 | 178510 | 0.1908 | 0.1860 | 0.1576 |
| 53110 | 0.2479 | 0.2436 | 0.1818 | 178710 | 0.1907 | 0.1859 | 0.1574 |
| 53310 | 0.2479 | 0.2438 | 0.1819 | 178910 | 0.1906 | 0.1858 | 0.1575 |
| 53510 | 0.2479 | 0.2436 | 0.1819 | 179110 | 0.1905 | 0.1858 | 0.1575 |
| 53710 | 0.2478 | 0.2435 | 0.1818 | 179310 | 0.1902 | 0.1856 | 0.1573 |
| 53910 | 0.2474 | 0.2431 | 0.1816 | 179510 | 0.1902 | 0.1857 | 0.1574 |
| 54110 | 0.2472 | 0.2430 | 0.1815 | 179710 | 0.1903 | 0.1856 | 0.1573 |
| 54310 | 0.2468 | 0.2427 | 0.1813 | 179910 | 0.1903 | 0.1854 | 0.1573 |
| 54510 | 0.2468 | 0.2425 | 0.1813 | 180110 | 0.1900 | 0.1853 | 0.1572 |
| 54710 | 0.2469 | 0.2423 | 0.1813 | 180310 | 0.1900 | 0.1853 | 0.1572 |
| 54910 | 0.2465 | 0.2422 | 0.1812 | 180510 | 0.1901 | 0.1852 | 0.1573 |
| 55110 | 0.2464 | 0.2422 | 0.1813 | 180710 | 0.1899 | 0.1853 | 0.1573 |
| 55310 | 0.2464 | 0.2421 | 0.1812 | 180910 | 0.1899 | 0.1852 | 0.1572 |
| 55510 | 0.2459 | 0.2416 | 0.1809 | 181110 | 0.1898 | 0.1851 | 0.1572 |
| 55710 | 0.2461 | 0.2417 | 0.1810 | 181310 | 0.1897 | 0.1852 | 0.1571 |
| 55910 | 0.2458 | 0.2415 | 0.1807 | 181510 | 0.1899 | 0.1851 | 0.1572 |
| 56110 | 0.2457 | 0.2412 | 0.1807 | 181710 | 0.1895 | 0.1847 | 0.1569 |
| 56310 | 0.2456 | 0.2412 | 0.1806 | 181910 | 0.1896 | 0.1846 | 0.1570 |
| 56510 | 0.2452 | 0.2409 | 0.1805 | 182110 | 0.1896 | 0.1847 | 0.1572 |
| 56710 | 0.2450 | 0.2405 | 0.1807 | 182310 | 0.1892 | 0.1848 | 0.1570 |
| 56910 | 0.2449 | 0.2405 | 0.1803 | 182510 | 0.1893 | 0.1846 | 0.1570 |
| 57110 | 0.2446 | 0.2402 | 0.1804 | 182710 | 0.1896 | 0.1846 | 0.1570 |
| 57310 | 0.2446 | 0.2401 | 0.1802 | 182910 | 0.1892 | 0.1845 | 0.1570 |
| 57510 | 0.2447 | 0.2402 | 0.1801 | 183110 | 0.1891 | 0.1842 | 0.1569 |
| 57710 | 0.2445 | 0.2401 | 0.1802 | 183310 | 0.1890 | 0.1843 | 0.1568 |
| 57910 | 0.2444 | 0.2399 | 0.1800 | 183510 | 0.1892 | 0.1845 | 0.1568 |
| 58110 | 0.2439 | 0.2394 | 0.1799 | 183710 | 0.1891 | 0.1842 | 0.1568 |
| 58310 | 0.2440 | 0.2396 | 0.1799 | 183910 | 0.1892 | 0.1841 | 0.1567 |
| 58510 | 0.2434 | 0.2393 | 0.1797 | 184110 | 0.1889 | 0.1841 | 0.1567 |
| 58710 | 0.2433 | 0.2393 | 0.1796 | 184310 | 0.1888 | 0.1839 | 0.1566 |
| 58910 | 0.2432 | 0.2391 | 0.1796 | 184510 | 0.1891 | 0.1840 | 0.1568 |
| 59110 | 0.2432 | 0.2390 | 0.1797 | 184710 | 0.1888 | 0.1839 | 0.1566 |
| 59310 | 0.2428 | 0.2392 | 0.1793 | 184910 | 0.1887 | 0.1838 | 0.1566 |
| 59510 | 0.2428 | 0.2385 | 0.1792 | 185110 | 0.1887 | 0.1837 | 0.1564 |
| 59710 | 0.2427 | 0.2385 | 0.1791 | 185310 | 0.1886 | 0.1838 | 0.1567 |
| 59910 | 0.2427 | 0.2384 | 0.1791 | 185510 | 0.1886 | 0.1839 | 0.1568 |
| 60110 | 0.2424 | 0.2381 | 0.1791 | 185710 | 0.1886 | 0.1838 | 0.1567 |
| 60310 | 0.2420 | 0.2380 | 0.1788 | 185910 | 0.1886 | 0.1835 | 0.1564 |
| 60510 | 0.2421 | 0.2378 | 0.1788 | 186110 | 0.1881 | 0.1833 | 0.1565 |
| 60710 | 0.2420 | 0.2377 | 0.1786 | 186310 | 0.1883 | 0.1833 | 0.1565 |
| 60910 | 0.2417 | 0.2377 | 0.1787 | 186510 | 0.1879 | 0.1830 | 0.1565 |
| 61110 | 0.2415 | 0.2376 | 0.1787 | 186710 | 0.1883 | 0.1831 | 0.1565 |
| 61310 | 0.2415 | 0.2374 | 0.1786 | 186910 | 0.1881 | 0.1833 | 0.1565 |
| 61510 | 0.2411 | 0.2370 | 0.1784 | 187110 | 0.1880 | 0.1832 | 0.1565 |
| 61710 | 0.2413 | 0.2371 | 0.1785 | 187310 | 0.1879 | 0.1830 | 0.1565 |
| 61910 | 0.2411 | 0.2369 | 0.1783 | 187510 | 0.1879 | 0.1830 | 0.1567 |
| 62110 | 0.2413 | 0.2371 | 0.1785 | 187710 | 0.1882 | 0.1832 | 0.1566 |
| 62310 | 0.2412 | 0.2366 | 0.1784 | 187910 | 0.1879 | 0.1828 | 0.1565 |
| 62510 | 0.2407 | 0.2366 | 0.1782 | 188110 | 0.1879 | 0.1829 | 0.1564 |

|       |        |        |        |        |        |        |        |
|-------|--------|--------|--------|--------|--------|--------|--------|
| 62710 | 0.2405 | 0.2362 | 0.1779 | 188310 | 0.1879 | 0.1831 | 0.1564 |
| 62910 | 0.2405 | 0.2362 | 0.1780 | 188510 | 0.1879 | 0.1831 | 0.1564 |
| 63110 | 0.2407 | 0.2362 | 0.1781 | 188710 | 0.1878 | 0.1829 | 0.1565 |
| 63310 | 0.2403 | 0.2362 | 0.1778 | 188910 | 0.1880 | 0.1830 | 0.1566 |
| 63510 | 0.2404 | 0.2361 | 0.1776 | 189110 | 0.1880 | 0.1829 | 0.1565 |
| 63710 | 0.2401 | 0.2356 | 0.1777 | 189310 | 0.1881 | 0.1830 | 0.1564 |
| 63910 | 0.2400 | 0.2355 | 0.1776 | 189510 | 0.1879 | 0.1829 | 0.1564 |
| 64110 | 0.2399 | 0.2354 | 0.1776 | 189710 | 0.1881 | 0.1830 | 0.1565 |
| 64310 | 0.2397 | 0.2351 | 0.1776 | 189910 | 0.1879 | 0.1829 | 0.1564 |
| 64510 | 0.2402 | 0.2353 | 0.1775 | 190110 | 0.1877 | 0.1828 | 0.1564 |
| 64710 | 0.2400 | 0.2351 | 0.1776 | 190310 | 0.1878 | 0.1825 | 0.1564 |
| 64910 | 0.2397 | 0.2348 | 0.1775 | 190510 | 0.1876 | 0.1823 | 0.1563 |
| 65110 | 0.2393 | 0.2345 | 0.1774 | 190710 | 0.1876 | 0.1823 | 0.1562 |
| 65310 | 0.2392 | 0.2345 | 0.1771 | 190910 | 0.1875 | 0.1824 | 0.1562 |
| 65510 | 0.2390 | 0.2343 | 0.1772 | 191110 | 0.1873 | 0.1822 | 0.1562 |
| 65710 | 0.2391 | 0.2340 | 0.1771 | 191310 | 0.1875 | 0.1822 | 0.1563 |
| 65910 | 0.2391 | 0.2343 | 0.1771 | 191510 | 0.1874 | 0.1821 | 0.1563 |
| 66110 | 0.2388 | 0.2340 | 0.1769 | 191710 | 0.1874 | 0.1823 | 0.1563 |
| 66310 | 0.2384 | 0.2336 | 0.1768 | 191910 | 0.1876 | 0.1822 | 0.1562 |
| 66510 | 0.2384 | 0.2333 | 0.1768 | 192110 | 0.1875 | 0.1819 | 0.1565 |
| 66710 | 0.2382 | 0.2332 | 0.1768 | 192310 | 0.1874 | 0.1821 | 0.1564 |
| 66910 | 0.2380 | 0.2333 | 0.1767 | 192510 | 0.1873 | 0.1820 | 0.1562 |
| 67110 | 0.2380 | 0.2331 | 0.1767 | 192710 | 0.1871 | 0.1818 | 0.1561 |
| 67310 | 0.2378 | 0.2331 | 0.1767 | 192910 | 0.1871 | 0.1817 | 0.1562 |
| 67510 | 0.2375 | 0.2330 | 0.1766 | 193110 | 0.1868 | 0.1816 | 0.1560 |
| 67710 | 0.2375 | 0.2327 | 0.1767 | 193310 | 0.1868 | 0.1816 | 0.1561 |
| 67910 | 0.2372 | 0.2324 | 0.1764 | 193510 | 0.1871 | 0.1817 | 0.1560 |
| 68110 | 0.2370 | 0.2322 | 0.1763 | 193710 | 0.1868 | 0.1818 | 0.1560 |
| 68310 | 0.2368 | 0.2319 | 0.1763 | 193910 | 0.1864 | 0.1815 | 0.1560 |
| 68510 | 0.2370 | 0.2321 | 0.1763 | 194110 | 0.1865 | 0.1814 | 0.1560 |
| 68710 | 0.2367 | 0.2320 | 0.1761 | 194310 | 0.1863 | 0.1813 | 0.1560 |
| 68910 | 0.2365 | 0.2318 | 0.1760 | 194510 | 0.1864 | 0.1812 | 0.1562 |
| 69110 | 0.2366 | 0.2316 | 0.1760 | 194710 | 0.1864 | 0.1815 | 0.1560 |
| 69310 | 0.2366 | 0.2317 | 0.1760 | 194910 | 0.1864 | 0.1814 | 0.1560 |
| 69510 | 0.2366 | 0.2315 | 0.1758 | 195110 | 0.1863 | 0.1815 | 0.1560 |
| 69710 | 0.2364 | 0.2311 | 0.1759 | 195310 | 0.1863 | 0.1812 | 0.1560 |
| 69910 | 0.2366 | 0.2314 | 0.1757 | 195510 | 0.1863 | 0.1813 | 0.1559 |
| 70110 | 0.2362 | 0.2310 | 0.1757 | 195710 | 0.1863 | 0.1816 | 0.1559 |
| 70310 | 0.2362 | 0.2309 | 0.1757 | 195910 | 0.1863 | 0.1816 | 0.1560 |
| 70510 | 0.2359 | 0.2307 | 0.1755 | 196110 | 0.1865 | 0.1815 | 0.1561 |
| 70710 | 0.2359 | 0.2308 | 0.1755 | 196310 | 0.1862 | 0.1810 | 0.1559 |
| 70910 | 0.2355 | 0.2304 | 0.1753 | 196510 | 0.1861 | 0.1811 | 0.1560 |
| 71110 | 0.2354 | 0.2306 | 0.1754 | 196710 | 0.1858 | 0.1812 | 0.1559 |
| 71310 | 0.2352 | 0.2303 | 0.1753 | 196910 | 0.1860 | 0.1812 | 0.1560 |
| 71510 | 0.2352 | 0.2301 | 0.1752 | 197110 | 0.1858 | 0.1813 | 0.1559 |
| 71710 | 0.2347 | 0.2297 | 0.1753 | 197310 | 0.1855 | 0.1812 | 0.1559 |
| 71910 | 0.2346 | 0.2299 | 0.1753 | 197510 | 0.1856 | 0.1810 | 0.1560 |
| 72110 | 0.2348 | 0.2298 | 0.1752 | 197710 | 0.1855 | 0.1811 | 0.1561 |
| 72310 | 0.2346 | 0.2295 | 0.1749 | 197910 | 0.1856 | 0.1808 | 0.1558 |
| 72510 | 0.2346 | 0.2296 | 0.1749 | 198110 | 0.1857 | 0.1808 | 0.1559 |
| 72710 | 0.2346 | 0.2294 | 0.1748 | 198310 | 0.1856 | 0.1806 | 0.1558 |
| 72910 | 0.2344 | 0.2294 | 0.1748 | 198510 | 0.1854 | 0.1808 | 0.1560 |
| 73110 | 0.2341 | 0.2288 | 0.1748 | 198710 | 0.1853 | 0.1806 | 0.1559 |
| 73310 | 0.2345 | 0.2290 | 0.1746 | 198910 | 0.1854 | 0.1806 | 0.1558 |

|       |        |        |        |        |        |        |        |
|-------|--------|--------|--------|--------|--------|--------|--------|
| 73510 | 0.2339 | 0.2286 | 0.1744 | 199110 | 0.1853 | 0.1807 | 0.1557 |
| 73710 | 0.2336 | 0.2284 | 0.1742 | 199310 | 0.1851 | 0.1803 | 0.1558 |
| 73910 | 0.2337 | 0.2284 | 0.1743 | 199510 | 0.1851 | 0.1806 | 0.1557 |
| 74110 | 0.2335 | 0.2284 | 0.1744 | 199710 | 0.1850 | 0.1805 | 0.1558 |
| 74310 | 0.2336 | 0.2282 | 0.1743 | 199910 | 0.1852 | 0.1805 | 0.1559 |
| 74510 | 0.2333 | 0.2281 | 0.1742 | 200110 | 0.1852 | 0.1806 | 0.1557 |
| 74710 | 0.2332 | 0.2281 | 0.1741 | 200310 | 0.1853 | 0.1807 | 0.1558 |
| 74910 | 0.2330 | 0.2278 | 0.1741 | 200510 | 0.1853 | 0.1805 | 0.1557 |
| 75110 | 0.2330 | 0.2277 | 0.1740 | 200710 | 0.1852 | 0.1807 | 0.1556 |
| 75310 | 0.2330 | 0.2278 | 0.1740 | 200910 | 0.1850 | 0.1805 | 0.1557 |
| 75510 | 0.2327 | 0.2276 | 0.1740 | 201110 | 0.1852 | 0.1804 | 0.1555 |
| 75710 | 0.2329 | 0.2278 | 0.1739 | 201310 | 0.1851 | 0.1805 | 0.1555 |
| 75910 | 0.2327 | 0.2274 | 0.1739 | 201510 | 0.1850 | 0.1803 | 0.1557 |
| 76110 | 0.2324 | 0.2273 | 0.1738 | 201710 | 0.1848 | 0.1801 | 0.1554 |
| 76310 | 0.2323 | 0.2273 | 0.1738 | 201910 | 0.1850 | 0.1801 | 0.1556 |
| 76510 | 0.2323 | 0.2272 | 0.1736 | 202110 | 0.1848 | 0.1800 | 0.1555 |
| 76710 | 0.2323 | 0.2270 | 0.1737 | 202310 | 0.1850 | 0.1802 | 0.1556 |
| 76910 | 0.2322 | 0.2269 | 0.1736 | 202510 | 0.1850 | 0.1803 | 0.1557 |
| 77110 | 0.2320 | 0.2268 | 0.1735 | 202710 | 0.1848 | 0.1803 | 0.1559 |
| 77310 | 0.2316 | 0.2263 | 0.1734 | 202910 | 0.1847 | 0.1800 | 0.1556 |
| 77510 | 0.2319 | 0.2262 | 0.1735 | 203110 | 0.1847 | 0.1801 | 0.1556 |
| 77710 | 0.2316 | 0.2263 | 0.1735 | 203310 | 0.1846 | 0.1798 | 0.1555 |
| 77910 | 0.2313 | 0.2260 | 0.1735 | 203510 | 0.1848 | 0.1797 | 0.1556 |
| 78110 | 0.2311 | 0.2257 | 0.1735 | 203710 | 0.1844 | 0.1796 | 0.1554 |
| 78310 | 0.2311 | 0.2255 | 0.1734 | 203910 | 0.1843 | 0.1797 | 0.1556 |
| 78510 | 0.2307 | 0.2255 | 0.1733 | 204110 | 0.1842 | 0.1796 | 0.1555 |
| 78710 | 0.2305 | 0.2258 | 0.1733 | 204310 | 0.1843 | 0.1795 | 0.1555 |
| 78910 | 0.2305 | 0.2252 | 0.1730 | 204510 | 0.1844 | 0.1796 | 0.1556 |
| 79110 | 0.2304 | 0.2252 | 0.1731 | 204710 | 0.1843 | 0.1796 | 0.1555 |
| 79310 | 0.2303 | 0.2252 | 0.1730 | 204910 | 0.1845 | 0.1796 | 0.1554 |
| 79510 | 0.2299 | 0.2248 | 0.1728 | 205110 | 0.1838 | 0.1792 | 0.1553 |
| 79710 | 0.2301 | 0.2247 | 0.1727 | 205310 | 0.1841 | 0.1794 | 0.1554 |
| 79910 | 0.2300 | 0.2244 | 0.1728 | 205510 | 0.1841 | 0.1796 | 0.1554 |
| 80110 | 0.2302 | 0.2245 | 0.1727 | 205710 | 0.1842 | 0.1794 | 0.1555 |
| 80310 | 0.2299 | 0.2244 | 0.1727 | 205910 | 0.1842 | 0.1794 | 0.1555 |
| 80510 | 0.2299 | 0.2245 | 0.1727 | 206110 | 0.1837 | 0.1792 | 0.1553 |
| 80710 | 0.2298 | 0.2244 | 0.1727 | 206310 | 0.1839 | 0.1793 | 0.1554 |
| 80910 | 0.2297 | 0.2243 | 0.1726 | 206510 | 0.1836 | 0.1791 | 0.1551 |
| 81110 | 0.2293 | 0.2241 | 0.1727 | 206710 | 0.1837 | 0.1790 | 0.1554 |
| 81310 | 0.2294 | 0.2241 | 0.1727 | 206910 | 0.1839 | 0.1793 | 0.1553 |
| 81510 | 0.2291 | 0.2239 | 0.1725 | 207110 | 0.1840 | 0.1789 | 0.1553 |
| 81710 | 0.2291 | 0.2236 | 0.1725 | 207310 | 0.1836 | 0.1788 | 0.1553 |
| 81910 | 0.2289 | 0.2235 | 0.1724 | 207510 | 0.1837 | 0.1788 | 0.1550 |
| 82110 | 0.2288 | 0.2235 | 0.1725 | 207710 | 0.1834 | 0.1787 | 0.1552 |
| 82310 | 0.2283 | 0.2232 | 0.1723 | 207910 | 0.1838 | 0.1790 | 0.1551 |
| 82510 | 0.2288 | 0.2232 | 0.1723 | 208110 | 0.1838 | 0.1787 | 0.1549 |
| 82710 | 0.2283 | 0.2230 | 0.1722 | 208310 | 0.1835 | 0.1784 | 0.1549 |
| 82910 | 0.2283 | 0.2227 | 0.1724 | 208510 | 0.1835 | 0.1786 | 0.1550 |
| 83110 | 0.2281 | 0.2226 | 0.1724 | 208710 | 0.1834 | 0.1786 | 0.1550 |
| 83310 | 0.2279 | 0.2226 | 0.1721 | 208910 | 0.1836 | 0.1787 | 0.1550 |
| 83510 | 0.2280 | 0.2226 | 0.1722 | 209110 | 0.1835 | 0.1785 | 0.1551 |
| 83710 | 0.2276 | 0.2224 | 0.1720 | 209310 | 0.1832 | 0.1786 | 0.1549 |
| 83910 | 0.2276 | 0.2219 | 0.1720 | 209510 | 0.1833 | 0.1781 | 0.1549 |
| 84110 | 0.2275 | 0.2221 | 0.1721 | 209710 | 0.1833 | 0.1782 | 0.1550 |

|       |        |        |        |        |        |        |        |
|-------|--------|--------|--------|--------|--------|--------|--------|
| 84310 | 0.2277 | 0.2220 | 0.1720 | 209910 | 0.1832 | 0.1785 | 0.1550 |
| 84510 | 0.2274 | 0.2218 | 0.1718 | 210110 | 0.1832 | 0.1781 | 0.1550 |
| 84710 | 0.2275 | 0.2217 | 0.1720 | 210310 | 0.1835 | 0.1783 | 0.1551 |
| 84910 | 0.2272 | 0.2217 | 0.1719 | 210510 | 0.1833 | 0.1781 | 0.1551 |
| 85110 | 0.2274 | 0.2217 | 0.1718 | 210710 | 0.1830 | 0.1781 | 0.1549 |
| 85310 | 0.2272 | 0.2215 | 0.1717 | 210910 | 0.1831 | 0.1781 | 0.1551 |
| 85510 | 0.2272 | 0.2215 | 0.1716 | 211110 | 0.1829 | 0.1780 | 0.1549 |
| 85710 | 0.2266 | 0.2212 | 0.1717 | 211310 | 0.1827 | 0.1779 | 0.1548 |
| 85910 | 0.2268 | 0.2214 | 0.1716 | 211510 | 0.1829 | 0.1781 | 0.1550 |
| 86110 | 0.2266 | 0.2213 | 0.1716 | 211710 | 0.1829 | 0.1779 | 0.1549 |
| 86310 | 0.2267 | 0.2212 | 0.1715 | 211910 | 0.1831 | 0.1780 | 0.1551 |
| 86510 | 0.2262 | 0.2211 | 0.1715 | 212110 | 0.1830 | 0.1779 | 0.1549 |
| 86710 | 0.2261 | 0.2209 | 0.1715 | 212310 | 0.1829 | 0.1778 | 0.1549 |
| 86910 | 0.2261 | 0.2208 | 0.1713 | 212510 | 0.1830 | 0.1779 | 0.1550 |
| 87110 | 0.2258 | 0.2208 | 0.1714 | 212710 | 0.1827 | 0.1775 | 0.1549 |
| 87310 | 0.2257 | 0.2204 | 0.1713 | 212910 | 0.1831 | 0.1780 | 0.1550 |
| 87510 | 0.2258 | 0.2205 | 0.1714 | 213110 | 0.1829 | 0.1779 | 0.1550 |
| 87710 | 0.2258 | 0.2206 | 0.1714 | 213310 | 0.1827 | 0.1776 | 0.1548 |
| 87910 | 0.2255 | 0.2203 | 0.1712 | 213510 | 0.1827 | 0.1777 | 0.1550 |
| 88110 | 0.2254 | 0.2203 | 0.1712 | 213710 | 0.1828 | 0.1778 | 0.1549 |
| 88310 | 0.2254 | 0.2204 | 0.1711 | 213910 | 0.1825 | 0.1777 | 0.1548 |
| 88510 | 0.2254 | 0.2204 | 0.1711 | 214110 | 0.1828 | 0.1776 | 0.1549 |
| 88710 | 0.2252 | 0.2200 | 0.1708 | 214310 | 0.1828 | 0.1777 | 0.1548 |
| 88910 | 0.2254 | 0.2204 | 0.1710 | 214510 | 0.1825 | 0.1776 | 0.1548 |
| 89110 | 0.2253 | 0.2202 | 0.1709 | 214710 | 0.1827 | 0.1774 | 0.1548 |
| 89310 | 0.2252 | 0.2199 | 0.1707 | 214910 | 0.1827 | 0.1775 | 0.1547 |
| 89510 | 0.2250 | 0.2198 | 0.1708 | 215110 | 0.1825 | 0.1775 | 0.1548 |
| 89710 | 0.2249 | 0.2195 | 0.1707 | 215310 | 0.1827 | 0.1775 | 0.1546 |
| 89910 | 0.2248 | 0.2192 | 0.1706 | 215510 | 0.1826 | 0.1773 | 0.1547 |
| 90110 | 0.2245 | 0.2194 | 0.1706 | 215710 | 0.1827 | 0.1776 | 0.1546 |
| 90310 | 0.2247 | 0.2192 | 0.1706 | 215910 | 0.1827 | 0.1777 | 0.1547 |
| 90510 | 0.2246 | 0.2192 | 0.1705 | 216110 | 0.1829 | 0.1778 | 0.1547 |
| 90710 | 0.2246 | 0.2191 | 0.1705 | 216310 | 0.1828 | 0.1776 | 0.1547 |
| 90910 | 0.2242 | 0.2190 | 0.1705 | 216510 | 0.1824 | 0.1774 | 0.1547 |
| 91110 | 0.2241 | 0.2191 | 0.1704 | 216710 | 0.1824 | 0.1774 | 0.1546 |
| 91310 | 0.2244 | 0.2190 | 0.1706 | 216910 | 0.1823 | 0.1774 | 0.1546 |
| 91510 | 0.2242 | 0.2187 | 0.1705 | 217110 | 0.1825 | 0.1774 | 0.1546 |
| 91710 | 0.2239 | 0.2188 | 0.1703 | 217310 | 0.1825 | 0.1772 | 0.1546 |
| 91910 | 0.2241 | 0.2188 | 0.1704 | 217510 | 0.1823 | 0.1770 | 0.1544 |
| 92110 | 0.2240 | 0.2188 | 0.1702 | 217710 | 0.1823 | 0.1771 | 0.1546 |
| 92310 | 0.2237 | 0.2185 | 0.1701 | 217910 | 0.1822 | 0.1771 | 0.1546 |
| 92510 | 0.2236 | 0.2182 | 0.1702 | 218110 | 0.1823 | 0.1771 | 0.1546 |
| 92710 | 0.2236 | 0.2182 | 0.1701 | 218310 | 0.1821 | 0.1767 | 0.1546 |
| 92910 | 0.2231 | 0.2180 | 0.1700 | 218510 | 0.1822 | 0.1770 | 0.1546 |
| 93110 | 0.2230 | 0.2179 | 0.1700 | 218710 | 0.1822 | 0.1771 | 0.1547 |
| 93310 | 0.2231 | 0.2178 | 0.1700 | 218910 | 0.1821 | 0.1768 | 0.1545 |
| 93510 | 0.2232 | 0.2179 | 0.1700 | 219110 | 0.1820 | 0.1770 | 0.1546 |
| 93710 | 0.2229 | 0.2176 | 0.1699 | 219310 | 0.1820 | 0.1769 | 0.1545 |
| 93910 | 0.2228 | 0.2175 | 0.1699 | 219510 | 0.1819 | 0.1770 | 0.1546 |
| 94110 | 0.2229 | 0.2174 | 0.1698 | 219710 | 0.1817 | 0.1766 | 0.1544 |
| 94310 | 0.2224 | 0.2171 | 0.1696 | 219910 | 0.1819 | 0.1768 | 0.1544 |
| 94510 | 0.2225 | 0.2169 | 0.1696 | 220110 | 0.1817 | 0.1766 | 0.1543 |
| 94710 | 0.2222 | 0.2169 | 0.1696 | 220310 | 0.1817 | 0.1762 | 0.1543 |
| 94910 | 0.2224 | 0.2168 | 0.1695 | 220510 | 0.1818 | 0.1767 | 0.1543 |

|        |        |        |        |        |        |        |        |
|--------|--------|--------|--------|--------|--------|--------|--------|
| 95110  | 0.2220 | 0.2165 | 0.1694 | 220710 | 0.1819 | 0.1766 | 0.1543 |
| 95310  | 0.2217 | 0.2164 | 0.1693 | 220910 | 0.1817 | 0.1764 | 0.1543 |
| 95510  | 0.2219 | 0.2162 | 0.1693 | 221110 | 0.1817 | 0.1763 | 0.1545 |
| 95710  | 0.2217 | 0.2161 | 0.1691 | 221310 | 0.1818 | 0.1763 | 0.1542 |
| 95910  | 0.2215 | 0.2161 | 0.1693 | 221510 | 0.1817 | 0.1764 | 0.1543 |
| 96110  | 0.2216 | 0.2164 | 0.1693 | 221710 | 0.1816 | 0.1762 | 0.1542 |
| 96310  | 0.2214 | 0.2161 | 0.1691 | 221910 | 0.1817 | 0.1763 | 0.1541 |
| 96510  | 0.2213 | 0.2160 | 0.1691 | 222110 | 0.1817 | 0.1763 | 0.1542 |
| 96710  | 0.2211 | 0.2158 | 0.1691 | 222310 | 0.1815 | 0.1763 | 0.1541 |
| 96910  | 0.2213 | 0.2159 | 0.1690 | 222510 | 0.1816 | 0.1761 | 0.1541 |
| 97110  | 0.2209 | 0.2157 | 0.1690 | 222710 | 0.1818 | 0.1763 | 0.1541 |
| 97310  | 0.2210 | 0.2156 | 0.1689 | 222910 | 0.1815 | 0.1762 | 0.1541 |
| 97510  | 0.2209 | 0.2158 | 0.1691 | 223110 | 0.1813 | 0.1763 | 0.1543 |
| 97710  | 0.2204 | 0.2151 | 0.1690 | 223310 | 0.1816 | 0.1764 | 0.1542 |
| 97910  | 0.2205 | 0.2151 | 0.1691 | 223510 | 0.1816 | 0.1762 | 0.1542 |
| 98110  | 0.2203 | 0.2149 | 0.1688 | 223710 | 0.1814 | 0.1762 | 0.1541 |
| 98310  | 0.2199 | 0.2146 | 0.1688 | 223910 | 0.1815 | 0.1764 | 0.1540 |
| 98510  | 0.2200 | 0.2146 | 0.1687 | 224110 | 0.1811 | 0.1759 | 0.1541 |
| 98710  | 0.2198 | 0.2145 | 0.1686 | 224310 | 0.1814 | 0.1759 | 0.1540 |
| 98910  | 0.2195 | 0.2144 | 0.1686 | 224510 | 0.1808 | 0.1756 | 0.1541 |
| 99110  | 0.2195 | 0.2144 | 0.1685 | 224710 | 0.1807 | 0.1755 | 0.1538 |
| 99310  | 0.2197 | 0.2143 | 0.1686 | 224910 | 0.1811 | 0.1757 | 0.1539 |
| 99510  | 0.2194 | 0.2144 | 0.1687 | 225110 | 0.1809 | 0.1758 | 0.1540 |
| 99710  | 0.2196 | 0.2141 | 0.1686 | 225310 | 0.1809 | 0.1757 | 0.1538 |
| 99910  | 0.2197 | 0.2141 | 0.1686 | 225510 | 0.1807 | 0.1756 | 0.1540 |
| 100110 | 0.2193 | 0.2138 | 0.1685 | 225710 | 0.1809 | 0.1756 | 0.1539 |
| 100310 | 0.2193 | 0.2138 | 0.1684 | 225910 | 0.1809 | 0.1758 | 0.1538 |
| 100510 | 0.2191 | 0.2137 | 0.1685 | 226110 | 0.1810 | 0.1756 | 0.1538 |
| 100710 | 0.2189 | 0.2132 | 0.1683 | 226310 | 0.1807 | 0.1758 | 0.1538 |
| 100910 | 0.2191 | 0.2135 | 0.1684 | 226510 | 0.1808 | 0.1757 | 0.1537 |
| 101110 | 0.2189 | 0.2132 | 0.1683 | 226710 | 0.1807 | 0.1756 | 0.1538 |
| 101310 | 0.2188 | 0.2129 | 0.1682 | 226910 | 0.1804 | 0.1753 | 0.1537 |
| 101510 | 0.2186 | 0.2132 | 0.1682 | 227110 | 0.1805 | 0.1757 | 0.1537 |
| 101710 | 0.2186 | 0.2129 | 0.1680 | 227310 | 0.1805 | 0.1756 | 0.1537 |
| 101910 | 0.2184 | 0.2130 | 0.1682 | 227510 | 0.1805 | 0.1756 | 0.1537 |
| 102110 | 0.2183 | 0.2129 | 0.1683 | 227710 | 0.1804 | 0.1753 | 0.1535 |
| 102310 | 0.2182 | 0.2129 | 0.1682 | 227910 | 0.1807 | 0.1754 | 0.1537 |
| 102510 | 0.2183 | 0.2126 | 0.1680 | 228110 | 0.1802 | 0.1752 | 0.1535 |
| 102710 | 0.2183 | 0.2129 | 0.1680 | 228310 | 0.1802 | 0.1752 | 0.1537 |
| 102910 | 0.2181 | 0.2126 | 0.1682 | 228510 | 0.1803 | 0.1753 | 0.1536 |
| 103110 | 0.2181 | 0.2125 | 0.1680 | 228710 | 0.1801 | 0.1752 | 0.1535 |
| 103310 | 0.2180 | 0.2123 | 0.1680 | 228910 | 0.1800 | 0.1749 | 0.1534 |
| 103510 | 0.2179 | 0.2127 | 0.1678 | 229110 | 0.1800 | 0.1751 | 0.1535 |
| 103710 | 0.2179 | 0.2126 | 0.1677 | 229310 | 0.1798 | 0.1749 | 0.1534 |
| 103910 | 0.2178 | 0.2124 | 0.1677 | 229510 | 0.1799 | 0.1751 | 0.1533 |
| 104110 | 0.2174 | 0.2122 | 0.1677 | 229710 | 0.1796 | 0.1749 | 0.1534 |
| 104310 | 0.2175 | 0.2121 | 0.1676 | 229910 | 0.1796 | 0.1749 | 0.1533 |
| 104510 | 0.2173 | 0.2118 | 0.1675 | 230110 | 0.1796 | 0.1749 | 0.1534 |
| 104710 | 0.2176 | 0.2121 | 0.1675 | 230310 | 0.1796 | 0.1749 | 0.1533 |
| 104910 | 0.2174 | 0.2120 | 0.1674 | 230510 | 0.1798 | 0.1748 | 0.1533 |
| 105110 | 0.2173 | 0.2121 | 0.1673 | 230710 | 0.1797 | 0.1750 | 0.1533 |
| 105310 | 0.2171 | 0.2117 | 0.1674 | 230910 | 0.1797 | 0.1750 | 0.1532 |
| 105510 | 0.2170 | 0.2117 | 0.1673 | 231110 | 0.1796 | 0.1748 | 0.1533 |
| 105710 | 0.2170 | 0.2118 | 0.1672 | 231310 | 0.1794 | 0.1747 | 0.1534 |

|        |        |        |        |        |        |        |        |
|--------|--------|--------|--------|--------|--------|--------|--------|
| 105910 | 0.2170 | 0.2117 | 0.1672 | 231510 | 0.1796 | 0.1748 | 0.1534 |
| 106110 | 0.2168 | 0.2115 | 0.1671 | 231710 | 0.1796 | 0.1745 | 0.1533 |
| 106310 | 0.2167 | 0.2113 | 0.1671 | 231910 | 0.1794 | 0.1744 | 0.1533 |
| 106510 | 0.2162 | 0.2111 | 0.1671 | 232110 | 0.1792 | 0.1742 | 0.1532 |
| 106710 | 0.2161 | 0.2111 | 0.1670 | 232310 | 0.1792 | 0.1744 | 0.1532 |
| 106910 | 0.2163 | 0.2111 | 0.1670 | 232510 | 0.1790 | 0.1743 | 0.1532 |
| 107110 | 0.2162 | 0.2112 | 0.1668 | 232710 | 0.1791 | 0.1742 | 0.1531 |
| 107310 | 0.2160 | 0.2108 | 0.1668 | 232910 | 0.1794 | 0.1744 | 0.1533 |
| 107510 | 0.2159 | 0.2108 | 0.1667 | 233110 | 0.1791 | 0.1741 | 0.1532 |
| 107710 | 0.2158 | 0.2107 | 0.1668 | 233310 | 0.1787 | 0.1740 | 0.1530 |
| 107910 | 0.2155 | 0.2105 | 0.1668 | 233510 | 0.1791 | 0.1741 | 0.1530 |
| 108110 | 0.2156 | 0.2105 | 0.1667 | 233710 | 0.1791 | 0.1739 | 0.1531 |
| 108310 | 0.2154 | 0.2103 | 0.1666 | 233910 | 0.1789 | 0.1740 | 0.1531 |
| 108510 | 0.2152 | 0.2101 | 0.1666 | 234110 | 0.1787 | 0.1739 | 0.1532 |
| 108710 | 0.2150 | 0.2101 | 0.1664 | 234310 | 0.1788 | 0.1739 | 0.1532 |
| 108910 | 0.2149 | 0.2101 | 0.1665 | 234510 | 0.1784 | 0.1737 | 0.1530 |
| 109110 | 0.2150 | 0.2102 | 0.1666 | 234710 | 0.1785 | 0.1737 | 0.1530 |
| 109310 | 0.2151 | 0.2101 | 0.1666 | 234910 | 0.1785 | 0.1736 | 0.1530 |
| 109510 | 0.2148 | 0.2100 | 0.1664 | 235110 | 0.1786 | 0.1736 | 0.1530 |
| 109710 | 0.2148 | 0.2097 | 0.1664 | 235310 | 0.1783 | 0.1735 | 0.1529 |
| 109910 | 0.2148 | 0.2098 | 0.1664 | 235510 | 0.1784 | 0.1737 | 0.1530 |
| 110110 | 0.2146 | 0.2098 | 0.1665 | 235710 | 0.1784 | 0.1735 | 0.1531 |
| 110310 | 0.2145 | 0.2095 | 0.1663 | 235910 | 0.1786 | 0.1736 | 0.1531 |
| 110510 | 0.2145 | 0.2098 | 0.1663 | 236110 | 0.1785 | 0.1736 | 0.1530 |
| 110710 | 0.2144 | 0.2096 | 0.1663 | 236310 | 0.1783 | 0.1732 | 0.1530 |
| 110910 | 0.2143 | 0.2092 | 0.1662 | 236510 | 0.1786 | 0.1736 | 0.1530 |
| 111110 | 0.2143 | 0.2093 | 0.1661 | 236710 | 0.1785 | 0.1735 | 0.1531 |
| 111310 | 0.2142 | 0.2094 | 0.1660 | 236910 | 0.1785 | 0.1735 | 0.1529 |
| 111510 | 0.2138 | 0.2092 | 0.1660 | 237110 | 0.1783 | 0.1734 | 0.1529 |
| 111710 | 0.2137 | 0.2090 | 0.1661 | 237310 | 0.1784 | 0.1734 | 0.1529 |
| 111910 | 0.2136 | 0.2090 | 0.1658 | 237510 | 0.1781 | 0.1733 | 0.1529 |
| 112110 | 0.2136 | 0.2087 | 0.1659 | 237710 | 0.1783 | 0.1733 | 0.1530 |
| 112310 | 0.2134 | 0.2086 | 0.1658 | 237910 | 0.1781 | 0.1733 | 0.1528 |
| 112510 | 0.2135 | 0.2087 | 0.1659 | 238110 | 0.1778 | 0.1731 | 0.1528 |
| 112710 | 0.2133 | 0.2086 | 0.1660 | 238310 | 0.1780 | 0.1731 | 0.1528 |
| 112910 | 0.2132 | 0.2085 | 0.1658 | 238510 | 0.1780 | 0.1732 | 0.1529 |
| 113110 | 0.2130 | 0.2083 | 0.1657 | 238710 | 0.1781 | 0.1731 | 0.1530 |
| 113310 | 0.2129 | 0.2083 | 0.1656 | 238910 | 0.1777 | 0.1729 | 0.1528 |
| 113510 | 0.2129 | 0.2080 | 0.1656 | 239110 | 0.1779 | 0.1731 | 0.1529 |
| 113710 | 0.2127 | 0.2079 | 0.1657 | 239310 | 0.1778 | 0.1728 | 0.1528 |
| 113910 | 0.2125 | 0.2077 | 0.1655 | 239510 | 0.1777 | 0.1728 | 0.1529 |
| 114110 | 0.2129 | 0.2080 | 0.1655 | 239710 | 0.1776 | 0.1726 | 0.1527 |
| 114310 | 0.2125 | 0.2077 | 0.1654 | 239910 | 0.1777 | 0.1726 | 0.1527 |
| 114510 | 0.2126 | 0.2078 | 0.1656 | 240110 | 0.1776 | 0.1727 | 0.1528 |
| 114710 | 0.2127 | 0.2075 | 0.1656 | 240310 | 0.1779 | 0.1726 | 0.1529 |
| 114910 | 0.2125 | 0.2076 | 0.1655 | 240510 | 0.1778 | 0.1726 | 0.1527 |
| 115110 | 0.2124 | 0.2074 | 0.1654 | 240710 | 0.1777 | 0.1725 | 0.1527 |
| 115310 | 0.2124 | 0.2072 | 0.1654 | 240910 | 0.1774 | 0.1723 | 0.1527 |
| 115510 | 0.2123 | 0.2071 | 0.1655 | 241110 | 0.1772 | 0.1721 | 0.1526 |
| 115710 | 0.2124 | 0.2071 | 0.1653 | 241310 | 0.1775 | 0.1723 | 0.1527 |
| 115910 | 0.2123 | 0.2073 | 0.1654 | 241510 | 0.1775 | 0.1721 | 0.1529 |
| 116110 | 0.2123 | 0.2072 | 0.1654 | 241710 | 0.1775 | 0.1723 | 0.1528 |
| 116310 | 0.2118 | 0.2069 | 0.1653 | 241910 | 0.1773 | 0.1723 | 0.1527 |
| 116510 | 0.2118 | 0.2068 | 0.1652 | 242110 | 0.1773 | 0.1720 | 0.1527 |



|        |        |        |        |        |          |         |          |
|--------|--------|--------|--------|--------|----------|---------|----------|
| 116710 | 0.2116 | 0.2066 | 0.1651 | 242310 | 0.1771   | 0.1720  | 0.1527   |
| 116910 | 0.2115 | 0.2066 | 0.1653 | 242510 | 0.1773   | 0.1719  | 0.1527   |
| 117110 | 0.2113 | 0.2064 | 0.1650 | 242710 | 0.1773   | 0.1722  | 0.1527   |
| 117310 | 0.2113 | 0.2063 | 0.1651 | 242910 | 0.1770   | 0.1717  | 0.1528   |
| 117510 | 0.2114 | 0.2060 | 0.1651 | 243110 | 0.1770   | 0.1717  | 0.1525   |
| 117710 | 0.2114 | 0.2061 | 0.1651 | 243310 | 0.1769   | 0.1716  | 0.1525   |
| 117910 | 0.2112 | 0.2060 | 0.1651 | 243510 | 0.1767   | 0.1717  | 0.1526   |
| 118110 | 0.2110 | 0.2058 | 0.1650 | 243710 | 0.1765   | 0.1713  | 0.1525   |
| 118310 | 0.2110 | 0.2058 | 0.1650 | 243910 | 0.1766   | 0.1715  | 0.1527   |
| 118510 | 0.2107 | 0.2058 | 0.1650 | 244110 | 0.1765   | 0.1712  | 0.1525   |
| 118710 | 0.2110 | 0.2061 | 0.1650 | 244310 | 0.1768   | 0.1715  | 0.1526   |
| 118910 | 0.2110 | 0.2057 | 0.1650 | 244510 | 0.1763   | 0.1715  | 0.1526   |
| 119110 | 0.2109 | 0.2058 | 0.1649 | 244710 | 0.1766   | 0.1714  | 0.1525   |
| 119310 | 0.2109 | 0.2058 | 0.1649 | 244910 | 0.1766   | 0.1715  | 0.1525   |
| 119510 | 0.2107 | 0.2057 | 0.1650 | 245110 | 0.1762   | 0.1711  | 0.1525   |
| 119710 | 0.2104 | 0.2055 | 0.1650 | 245310 | 0.1762   | 0.1712  | 0.1524   |
| 119910 | 0.2105 | 0.2056 | 0.1650 | 245510 | 0.1762   | 0.1711  | 0.1524   |
| 120110 | 0.2103 | 0.2054 | 0.1650 | 245710 | 0.1763   | 0.1713  | 0.1525   |
| 120310 | 0.2100 | 0.2051 | 0.1648 | 245910 | 0.1761   | 0.1709  | 0.1524   |
| 120510 | 0.2101 | 0.2053 | 0.1647 | 246110 | 0.1761   | 0.1709  | 0.1525   |
| 120710 | 0.2101 | 0.2051 | 0.1648 | 246310 | 0.1761   | 0.1710  | 0.1525   |
| 120910 | 0.2100 | 0.2048 | 0.1648 | 246510 | 0.1760   | 0.1712  | 0.1524   |
| 121110 | 0.2100 | 0.2050 | 0.1648 | 246710 | 0.1760   | 0.1708  | 0.1525   |
| 121310 | 0.2101 | 0.2049 | 0.1648 | 246910 | 0.1761   | 0.1708  | 0.1523   |
| 121510 | 0.2102 | 0.2050 | 0.1645 | 247110 | 0.1758   | 0.1708  | 0.1524   |
| 121710 | 0.2098 | 0.2048 | 0.1646 | 247310 | 0.1757   | 0.1706  | 0.1523   |
| 121910 | 0.2097 | 0.2048 | 0.1647 | 247510 | 0.1757   | 0.1704  | 0.1523   |
| 122110 | 0.2096 | 0.2049 | 0.1645 | 247710 | 0.1756   | 0.1704  | 0.1526   |
| 122310 | 0.2095 | 0.2049 | 0.1646 | 247910 | 0.1758   | 0.1705  | 0.1524   |
| 122510 | 0.2094 | 0.2046 | 0.1646 | 248110 | 0.1758   | 0.1706  | 0.1523   |
| 122710 | 0.2093 | 0.2047 | 0.1646 | 248310 | 0.1755   | 0.1704  | 0.1524   |
| 122910 | 0.2093 | 0.2044 | 0.1645 | 248510 | 0.1753   | 0.1703  | 0.1522   |
| 123110 | 0.2092 | 0.2042 | 0.1645 | 248710 | 0.1756   | 0.1705  | 0.1523   |
| 123310 | 0.2088 | 0.2038 | 0.1645 | 248910 | 0.1755   | 0.1702  | 0.1522   |
| 123510 | 0.2088 | 0.2043 | 0.1643 | 249110 | 0.1751   | 0.1701  | 0.1523   |
| 123710 | 0.2090 | 0.2044 | 0.1643 | 249310 | 0.1751   | 0.1704  | 0.1522   |
| 123910 | 0.2087 | 0.2041 | 0.1644 | 249510 | 0.1753   | 0.1706  | 0.1523   |
|        |        |        |        | 249710 | 0.175114 | 0.17045 | 0.152187 |

---

**Supplementary Table 9. Gene list (496 genes) from the sweep region harboring the QTL associated with major traits.**

| No | Gene          | Start : End      | Size    | Trait       | QTLs           | Annotation                                                                                                                                                                                                      |
|----|---------------|------------------|---------|-------------|----------------|-----------------------------------------------------------------------------------------------------------------------------------------------------------------------------------------------------------------|
| 1  | Glyma02g10630 | 7939100:11465400 | 3526300 | YIELD       | Q_COLYLDIR_2-1 | PTHR21726:SF16,PTHR21726 AT2G39435.1 Phosphatidylinositol N-acetylglucosaminyltransferase subunit P-related                                                                                                     |
| 2  | Glyma02g10630 | 7939100:11465400 | 3526300 | YIELD       | Q_COLYLDIR_2-1 | PTHR21726:SF16,PTHR21726 AT2G39435.1 Phosphatidylinositol N-acetylglucosaminyltransferase subunit P-related                                                                                                     |
| 3  | Glyma02g10640 | 7939100:11465400 | 3526300 | YIELD       | Q_COLYLDIR_2-1 | PF01423 PTHR23338:SF18,PTHR23338 KOG3428 AT4G02840.1 Small nuclear ribonucleoprotein family protein                                                                                                             |
| 4  | Glyma02g10660 | 7939100:11465400 | 3526300 | YIELD       | Q_COLYLDIR_2-1 | PF00462 PTHR10168 KOG1752 GO:0009055,GO:0015035,GO:0045454 AT5G14070.1 ROXY2 Thioredoxin superfamily protein                                                                                                    |
| 5  | Glyma02g10690 | 7939100:11465400 | 3526300 | YIELD       | Q_COLYLDIR_2-1 | PF01842 PTHR13734,PTHR13734:SF23 GO:0016597,GO:0008152 AT1G69040.2 ACR4 ACT domain repeat 4                                                                                                                     |
| 6  | Glyma02g10710 | 7939100:11465400 | 3526300 | YIELD       | Q_COLYLDIR_2-1 | PF02781,PF00479 PTHR23429 KOG0563 1.1.1.49 K00036 GO:0004345,GO:0050661,GO:0006006,GO:0055114 AT5G13110.1 G6PD2 glucose-6-phosphate dehydrogenase 2                                                             |
| 7  | Glyma02g10720 | 7939100:11465400 | 3526300 | YIELD       | Q_COLYLDIR_2-1 |                                                                                                                                                                                                                 |
| 8  | Glyma03g26060 | 3699336:4200251  | 500915  | YIELD       | Q_COLYLDIR_5-2 | PF02298 GO:0005507,GO:0009055 AT2G32300.1 UCC1 uclacyanin 1                                                                                                                                                     |
| 9  | Glyma03g26080 | 3699336:4200251  | 500915  | YIELD       | Q_COLYLDIR_5-2 | PF00573 PTHR10746 KOG1624 GO:0003735,GO:0006412,GO:0005840 AT1G07320.1 RPL4 ribosomal protein L4                                                                                                                |
| 10 | Glyma03g26540 | 3699336:4200251  | 500915  | YIELD       | Q_COLYLDIR_5-2 | AT4G37930.1 SHM1,SHMT1,STM serine transhydroxymethyltransferase 1                                                                                                                                               |
| 11 | Glyma03g26550 | 3699336:4200251  | 500915  | YIELD       | Q_COLYLDIR_5-2 | AT3G20810.2 2-oxoglutarate (2OG) and Fe(II)-dependent oxygenase superfamily protein                                                                                                                             |
| 12 | Glyma03g26580 | 3699336:4200251  | 500915  | YIELD       | Q_COLYLDIR_5-2 | PF00179 PTHR24067:SF8,PTHR24067 KOG0896 GO:0016881 AT3G52560.1 MMZ4,UEV1D,UEV1D-4 ubiquitin E2 variant 1D-4                                                                                                     |
| 13 | Glyma03g26590 | 3699336:4200251  | 500915  | YIELD       | Q_COLYLDIR_5-2 | PF00106 PTHR24322 KOG0725 GO:0016491,GO:0008152 AT3G51680.1 NAD(P)-binding Rossmann-fold superfamily protein                                                                                                    |
| 14 | Glyma03g30640 | 3699336:4200251  | 500915  | YIELD       | Q_COLYLDIR_5-2 | PF03171 KOG4176 GO:0016491,GO:0016706,GO:0055114 AT4G02940.1 oxidoreductase, 2OG-Fe(II) oxygenase family protein                                                                                                |
| 15 | Glyma03g30650 | 3699336:4200251  | 500915  | YIELD       | Q_COLYLDIR_5-2 |                                                                                                                                                                                                                 |
| 16 | Glyma03g30660 | 3699336:4200251  | 500915  | YIELD       | Q_COLYLDIR_5-2 | AT2G48090.1                                                                                                                                                                                                     |
| 17 | Glyma03g30673 | 3699336:4200251  | 500915  | YIELD       | Q_COLYLDIR_5-2 | AT2G42190.1                                                                                                                                                                                                     |
| 18 | Glyma03g30686 | 3699336:4200251  | 500915  | YIELD       | Q_COLYLDIR_5-2 | PF00225 PTHR24115:SF176,PTHR24115 GO:0003777,GO:0005524,GO:0007018 AT2G21380.1 Kinesin motor family protein                                                                                                     |
| 19 | Glyma03g30700 | 3699336:4200251  | 500915  | YIELD       | Q_COLYLDIR_5-2 |                                                                                                                                                                                                                 |
| 20 | Glyma05g04250 | 3183520:4168520  | 985000  | WHOLE-PLANT | PI ht 24-3     | PF02365 GO:0003677,GO:0006355 AT1G12260.1 ANAC007,EMB2749,NAC007,VND4 NAC 7                                                                                                                                     |
| 21 | Glyma05g04260 | 3183520:4168520  | 985000  | WHOLE-PLANT | PI ht 24-3     | PF04690 AT2G45190.1 AFO,FIL,YAB1 Plant-specific transcription factor YABBY family protein                                                                                                                       |
| 22 | Glyma05g04270 | 3183520:4168520  | 985000  | WHOLE-PLANT | PI ht 24-3     | PF07732,PF00394,PF07731 PTHR11709,PTHR11709:SF18 KOG1263 GO:0016491,GO:0055114,GO:0005507 AT4G12420.1 SKU5 Cupredoxin superfamily protein                                                                       |
| 23 | Glyma05g04610 | 3183520:4168520  | 985000  | WHOLE-PLANT | PI ht 24-3     |                                                                                                                                                                                                                 |
| 24 | Glyma05g04630 | 3183520:4168520  | 985000  | WHOLE-PLANT | PI ht 24-3     | PF01501 PTHR11183:SF5,PTHR11183 GO:0016757 AT4G16600.1 Nucleotide-diphospho-sugar transferases superfamily protein                                                                                              |
| 25 | Glyma05g04650 | 3183520:4168520  | 985000  | WHOLE-PLANT | PI ht 24-3     | PF04614 PTHR12774 KOG3133 K13337 GO:0005777 AT5G17550.1 AtPEX19-2,PEX19-2 peroxin 19-2                                                                                                                          |
| 26 | Glyma05g04660 | 3183520:4168520  | 985000  | WHOLE-PLANT | PI ht 24-3     | PF00152 PTHR22594:SF6,PTHR22594 KOG0554 6.1.1.22 K01893 GO:0000166,GO:0004812,GO:0005524,GO:0006418,GO:0005737,GO:0006412 AT4G17300.1 ATNS1,NS1,OVA8 Class II aminoacyl-tRNA and biotin synthetases superfamily |
| 27 | Glyma05g04670 | 3183520:4168520  | 985000  | WHOLE-PLANT | PI ht 24-3     | PF04758 PTHR12650 KOG0009 K02983 GO:0003735,GO:0006412,GO:0005622,GO:0005840 AT5G56670.1 Ribosomal protein S30 family protein                                                                                   |

|    |               |                   |         |             |              |                                                                                                                                                                                                                                                      |
|----|---------------|-------------------|---------|-------------|--------------|------------------------------------------------------------------------------------------------------------------------------------------------------------------------------------------------------------------------------------------------------|
| 28 | Glyma05g04680 | 3183520:4168520   | 985000  | WHOLE-PLANT | PI ht 24-3   |                                                                                                                                                                                                                                                      |
| 29 | Glyma05g04690 | 3183520:4168520   | 985000  | WHOLE-PLANT | PI ht 24-3   | PTHR11389,PTHR11389:SF378 AT3G60580.1 C2H2-like zinc finger protein                                                                                                                                                                                  |
| 30 | Glyma05g04700 | 3183520:4168520   | 985000  | WHOLE-PLANT | PI ht 24-3   | PF00892 GO:0016020 AT5G47470.1 Nodulin MtN21 /EamA-like transporter family protein                                                                                                                                                                   |
| 31 | Glyma05g04720 | 3183520:4168520   | 985000  | WHOLE-PLANT | PI ht 24-3   | PF10250 AT4G16650.1 O-fucosyltransferase family protein                                                                                                                                                                                              |
| 32 | Glyma05g04740 | 3183520:4168520   | 985000  | WHOLE-PLANT | PI ht 24-3   | PF04784 PTHR23054 AT5G47380.1 Protein of unknown function, DUF547                                                                                                                                                                                    |
| 33 | Glyma05g04750 | 3183520:4168520   | 985000  | WHOLE-PLANT | PI ht 24-3   | PF00551 PTHR10520,PTHR10520:SF7 KOG3076 3.5.1.10 K01433                                                                                                                                                                                              |
| 34 | Glyma05g04760 | 3183520:4168520   | 985000  | WHOLE-PLANT | PI ht 24-3   | GO:0016742,GO:0009058,GO:0008864,GO:0006189 AT5G47435.1 formyltetrahydrofolate deformylase, putative<br>PF05703,PF08458 PTHR24730:SF7,PTHR24730 AT4G17350.1 Plant protein of unknown function (DUF828) with<br>plant pleckstrin homology-like region |
| 35 | Glyma05g04770 | 3183520:4168520   | 985000  | WHOLE-PLANT | PI ht 24-3   | PF01501 PTHR11183:SF7,PTHR11183 KOG1950 GO:0016757 AT3G18660.2 GUX1,PGSIP1 plant glycogenin-like<br>starch initiation protein 1                                                                                                                      |
| 36 | Glyma05g04840 | 3183520:4168520   | 985000  | WHOLE-PLANT | PI ht 24-3   | AT4G16695.1                                                                                                                                                                                                                                          |
| 37 | Glyma05g04860 | 3183520:4168520   | 985000  | WHOLE-PLANT | PI ht 24-3   | PF02894,PF01408 PTHR22604:SF14,PTHR22604 KOG2741 GO:0016491,GO:0008152,GO:0055114 AT4G17370.1<br>Oxidoreductase family protein                                                                                                                       |
| 38 | Glyma05g04870 | 3183520:4168520   | 985000  | WHOLE-PLANT | PI ht 24-3   | PF00827 PTHR11847 KOG1678 K02877 GO:0003735,GO:0006412,GO:0005840,GO:0005622 AT4G16720.1<br>Ribosomal protein L23/L15e family protein                                                                                                                |
| 39 | Glyma05g04880 | 3183520:4168520   | 985000  | WHOLE-PLANT | PI ht 24-3   | PF08783 PTHR15439 KOG0314 GO:0008270,GO:0005634 AT5G47430.1 DWNN domain, a CCHC-type zinc finger                                                                                                                                                     |
| 40 | Glyma05g04900 | 3183520:4168520   | 985000  | WHOLE-PLANT | PI ht 24-3   | PF00249 PTHR10641 KOG0048 GO:0003677 AT3G13540.1 ATMYB5,MYB5 myb domain protein 5                                                                                                                                                                    |
| 41 | Glyma05g04910 | 3183520:4168520   | 985000  | WHOLE-PLANT | PI ht 24-3   | AT5G47400.1                                                                                                                                                                                                                                          |
| 42 | Glyma05g04920 | 3183520:4168520   | 985000  | WHOLE-PLANT | PI ht 24-3   | PF00847 GO:0003700,GO:0006355 AT2G44940.1 Integrase-type DNA-binding superfamily protein                                                                                                                                                             |
| 43 | Glyma05g04940 | 3183520:4168520   | 985000  | WHOLE-PLANT | PI ht 24-3   | PF01756,PF02770,PF00441 PTHR10909:SF11,PTHR10909 KOG0136 1.3.3.6 K00232<br>GO:0016627,GO:0055114,GO:0003997,GO:0006635,GO:0005777,GO:0003995 AT4G16760.1 ACX1,ATACX1 acyl-<br>CoA oxidase 1                                                          |
| 44 | Glyma05g04950 | 3183520:4168520   | 985000  | WHOLE-PLANT | PI ht 24-3   | PF00249 PTHR12374 GO:0003677 AT5G47390.1 myb-like transcription factor family protein                                                                                                                                                                |
| 45 | Glyma05g05520 | 4925000:5122000   | 197000  | POD         | Pod mat 16-1 | PF00244 PTHR18860 GO:0019904 AT4G09000.1 GF14 CHI,GRF1 general regulatory factor 1                                                                                                                                                                   |
| 46 | Glyma05g05540 | 4925000:5122000   | 197000  | POD         | Pod mat 16-1 | PF00069 PTHR24343:SF58,PTHR24343 KOG0583 GO:0004672,GO:0005524,GO:0006468 AT4G33950.1<br>ATOST1,OST1,P44,SNRK2-6,SNRK2.6,SRK2E Protein kinase superfamily protein                                                                                    |
| 47 | Glyma05g05580 | 4925000:5122000   | 197000  | POD         | Pod mat 16-1 | PTHR23056,PTHR23056:SF16 KOG0034 K06268 AT5G47100.1 ATCBL9,CBL9 calcineurin B-like protein 9                                                                                                                                                         |
| 48 | Glyma05g05610 | 4925000:5122000   | 197000  | POD         | Pod mat 16-1 | PF09747 KOG3044 AT5G47090.1                                                                                                                                                                                                                          |
| 49 | Glyma05g05620 | 4925000:5122000   | 197000  | POD         | Pod mat 16-1 | PF01214 PTHR11740 KOG3092 GO:0019887,GO:0005956 AT5G47080.1 CKB1 casein kinase II beta chain 1                                                                                                                                                       |
| 50 | Glyma05g05650 | 4925000:5122000   | 197000  | POD         | Pod mat 16-1 | PF01214 PTHR11740 KOG3092 K03115 GO:0019887,GO:0005956 AT2G44680.1 CKB4 casein kinase II beta subunit 4                                                                                                                                              |
| 51 | Glyma05g05660 | 4925000:5122000   | 197000  | POD         | Pod mat 16-1 | ATMG00030.1                                                                                                                                                                                                                                          |
| 52 | Glyma05g14740 | 14775000:19109000 | 4334000 | WHOLE-PLANT | CWP 1-1      | PF01165 GO:0003735,GO:0006412,GO:0005622,GO:0005840 AT3G27160.1 GHS1 Ribosomal protein S21 family<br>protein                                                                                                                                         |
| 53 | Glyma05g14760 | 14775000:19109000 | 4334000 | WHOLE-PLANT | CWP 1-1      | PF00654,PF00571 PTHR11689:SF11,PTHR11689 KOG0474<br>GO:0005515,GO:0005247,GO:0006821,GO:0055085,GO:0016020 AT3G27170.1 ATCLC-B,CLC-B chloride channel B                                                                                              |
| 54 | Glyma05g14770 | 14775000:19109000 | 4334000 | WHOLE-PLANT | CWP 1-1      | PF00675 PTHR11851,PTHR11851:SF34 GO:0004222,GO:0006508 AT5G42390.1 Insulinase (Peptidase family M16)<br>family protein                                                                                                                               |
| 55 | Glyma05g14780 | 14775000:19109000 | 4334000 | WHOLE-PLANT | CWP 1-1      | PF05617 AT1G57775.1 Protein of unknown function (DUF784)                                                                                                                                                                                             |

|    |               |                   |         |             |             |                                                                                                                                                                                |
|----|---------------|-------------------|---------|-------------|-------------|--------------------------------------------------------------------------------------------------------------------------------------------------------------------------------|
| 56 | Glyma05g14800 | 14775000:19109000 | 4334000 | WHOLE-PLANT | CWP 1-1     | PF02298 GO:0005507,GO:0009055 AT3G27200.1 Cupredoxin superfamily protein                                                                                                       |
| 57 | Glyma05g14810 | 14775000:19109000 | 4334000 | WHOLE-PLANT | CWP 1-1     |                                                                                                                                                                                |
| 58 | Glyma05g14820 | 14775000:19109000 | 4334000 | WHOLE-PLANT | CWP 1-1     | PF03140 AT3G50180.1 Plant protein of unknown function (DUF247)                                                                                                                 |
| 59 | Glyma05g14850 | 14775000:19109000 | 4334000 | WHOLE-PLANT | CWP 1-1     | PF00011 PTHR11527,PTHR11527:SF14 AT1G53540.1 HSP20-like chaperones superfamily protein                                                                                         |
| 60 | Glyma05g14860 | 14775000:19109000 | 4334000 | WHOLE-PLANT | CWP 1-1     | PF03140 AT3G50120.1 Plant protein of unknown function (DUF247)                                                                                                                 |
| 61 | Glyma05g14870 | 14775000:19109000 | 4334000 | WHOLE-PLANT | CWP 1-1     | AT3G01860.1                                                                                                                                                                    |
| 62 | Glyma05g15100 | 14775000:19109000 | 4334000 | WHOLE-PLANT | CWP 1-1     | PF04935 PTHR14369 KOG2885 AT5G05210.1 Surfeit locus protein 6                                                                                                                  |
| 63 | Glyma05g15130 | 14775000:19109000 | 4334000 | WHOLE-PLANT | CWP 1-1     | PF00012 PTHR19375:SF1,PTHR19375 GO:0005524 AT5G28540.1 BIP1 heat shock protein 70 (Hsp 70) family protein                                                                      |
| 64 | Glyma05g15150 | 14775000:19109000 | 4334000 | WHOLE-PLANT | CWP 1-1     | PF00560,PF07714 PTHR24420,PTHR24420:SF465 KOG1187 GO:0004672,GO:0005524,GO:0006468,GO:0005515 AT5G14210.1 Leucine-rich repeat protein kinase family protein                    |
| 65 | Glyma05g15170 | 14775000:19109000 | 4334000 | WHOLE-PLANT | CWP 1-1     | PF02536 PTHR13068 KOG1267 AT4G14605.1 Mitochondrial transcription termination factor family protein                                                                            |
| 66 | Glyma05g21411 | 14775000:19109000 | 4334000 | WHOLE-PLANT | CWP 1-2     |                                                                                                                                                                                |
| 67 | Glyma07g12180 | 7683000:11623000  | 3940000 | WHOLE-PLANT | Cnpy ht 2-1 | PF01554 PTHR11206:SF38,PTHR11206 KOG1347 GO:0015238,GO:0015297,GO:0006855,GO:0055085,GO:0016020 AT4G29140.1 MATE efflux family protein                                         |
| 68 | Glyma07g12190 | 7683000:11623000  | 3940000 | WHOLE-PLANT | Cnpy ht 2-1 | PF03727,PF00349 PTHR19443 KOG1369 2.7.1.1 K00844 GO:0005524,GO:0016773,GO:0005975 AT4G29130.1 ATHXK1,GIN2,HXK1 hexokinase 1                                                    |
| 69 | Glyma07g12210 | 7683000:11623000  | 3940000 | WHOLE-PLANT | Cnpy ht 2-1 | PF03171 PTHR10209,PTHR10209:SF55 KOG0143 GO:0016491,GO:0016706,GO:0055114 AT3G13610.1 2-oxoglutarate (2OG) and Fe(II)-dependent oxygenase superfamily protein                  |
| 70 | Glyma07g12250 | 7683000:11623000  | 3940000 | WHOLE-PLANT | Cnpy ht 2-1 | AT1G05350.1 NAD(P)-binding Rossmann-fold superfamily protein                                                                                                                   |
| 71 | Glyma07g12280 | 7683000:11623000  | 3940000 | WHOLE-PLANT | Cnpy ht 2-1 | PF03987 PTHR12866 KOG4741 AT3G07525.1 ATATG10,ATG10 autophagocytosis-associated family protein                                                                                 |
| 72 | Glyma07g12340 | 7683000:11623000  | 3940000 | WHOLE-PLANT | Cnpy ht 2-1 | PF00749 PTHR10119:SF1,PTHR10119 KOG1149 6.1.1.17 K01885 GO:0000166,GO:0005524,GO:0016876,GO:0043039,GO:0005737,GO:0006412 AT5G64050.1 ATERS,ERS,OVA3 glutamate tRNA synthetase |
| 73 | Glyma07g12380 | 7683000:11623000  | 3940000 | WHOLE-PLANT | Cnpy ht 2-1 | AT5G17610.1                                                                                                                                                                    |
| 74 | Glyma07g12400 | 7683000:11623000  | 3940000 | WHOLE-PLANT | Cnpy ht 2-1 | PTHR11639,PTHR11639:SF43 AT1G64850.1 Calcium-binding EF hand family protein                                                                                                    |
| 75 | Glyma07g12960 | 7683000:11623000  | 3940000 | WHOLE-PLANT | Cnpy ht 2-1 | PF10536 AT1G17930.1 Aminotransferase-like, plant mobile domain family protein                                                                                                  |
| 76 | Glyma07g12970 | 7683000:11623000  | 3940000 | WHOLE-PLANT | Cnpy ht 2-1 | PF12600 AT2G44640.1                                                                                                                                                            |
| 77 | Glyma07g12980 | 7683000:11623000  | 3940000 | WHOLE-PLANT | Cnpy ht 2-1 | PF00166 PTHR10772:SF0,PTHR10772 KOG1641 GO:0006457,GO:0005737 AT3G60210.1 GroES-like family protein                                                                            |
| 78 | Glyma07g12990 | 7683000:11623000  | 3940000 | WHOLE-PLANT | Cnpy ht 2-1 | PTHR14155:SF2,PTHR14155 AT3G60220.1 AT4,TL4 TOXICOS EN LEVADURA 4                                                                                                              |
| 79 | Glyma07g13005 | 7683000:11623000  | 3940000 | WHOLE-PLANT | Cnpy ht 2-1 | PF03153 PTHR12694:SF2,PTHR12694 GO:0006367,GO:0005672,GO:0003702 AT1G07480.1 Transcription factor IIA, alpha/beta subunit                                                      |
| 80 | Glyma07g13020 | 7683000:11623000  | 3940000 | WHOLE-PLANT | Cnpy ht 2-1 | AT4G26760.1 MAP65-2 microtubule-associated protein 65-2                                                                                                                        |
| 81 | Glyma07g13040 | 7683000:11623000  | 3940000 | WHOLE-PLANT | Cnpy ht 2-1 | PF00637,PF10367,PF10366,PF00780 PTHR12894:SF4,PTHR12894 KOG2063 GO:0006886,GO:0016192,GO:0005083 AT1G22860.1 Vacuolar sorting protein 39                                       |

|     |               |                   |          |             |                |                                                                                                                                                                                       |
|-----|---------------|-------------------|----------|-------------|----------------|---------------------------------------------------------------------------------------------------------------------------------------------------------------------------------------|
| 82  | Glyma07g13070 | 7683000:11623000  | 3940000  | WHOLE-PLANT | Cnpy ht 2-1    | AT1G02180.1 ferredoxin-related                                                                                                                                                        |
| 83  | Glyma07g13100 | 7683000:11623000  | 3940000  | WHOLE-PLANT | Cnpy ht 2-1    | PF03171 PTHR10209,PTHR10209:SF55 KOG0143 GO:0016491,GO:0016706,GO:0055114 AT5G59540.1 2-oxoglutarate (2OG) and Fe(II)-dependent oxygenase superfamily protein                         |
| 84  | Glyma07g13120 | 7683000:11623000  | 3940000  | WHOLE-PLANT | Cnpy ht 2-1    | PF00637,PF12451 PTHR23323:SF24,PTHR23323 KOG2114 GO:0006886,GO:0016192 AT2G05170.1 ATVPS11,VPS11 vacuolar protein sorting 11                                                          |
| 85  | Glyma07g13130 | 7683000:11623000  | 3940000  | WHOLE-PLANT | Cnpy ht 2-1    | PF00201 PTHR11926:SF15,PTHR11926 KOG1192 GO:0016758,GO:0008152 AT4G01070.1 GT72B1,UGT72B1 UDP-Glycosyltransferase superfamily protein                                                 |
| 86  | Glyma09g08070 | 3370670:8049420   | 4678750  | OTHER-SEED  | Sd cadmium 1-1 | PF00583 PTHR23091:SF22,PTHR23091 GO:0008080,GO:0016747,GO:0008152 AT2G06025.1 Acyl-CoA N-acyltransferases (NAT) superfamily protein                                                   |
| 87  | Glyma09g08080 | 3370670:8049420   | 4678750  | OTHER-SEED  | Sd cadmium 1-1 | PF03133 PTHR12241:SF13,PTHR12241 GO:0004835,GO:0006464 AT1G77550.1 tubulin-tyrosine ligases;tubulin-tyrosine ligases                                                                  |
| 88  | Glyma09g08090 | 3370670:8049420   | 4678750  | OTHER-SEED  | Sd cadmium 1-1 | AT2G06005.1 FIP1 FRIGIDA interacting protein 1                                                                                                                                        |
| 89  | Glyma09g08100 | 3370670:8049420   | 4678750  | OTHER-SEED  | Sd cadmium 1-1 | PF08246,PF00112 PTHR12411:SF50,PTHR12411 KOG1543 3.4.22.16 K01366 GO:0008234,GO:0006508,GO:0004197 AT3G45310.1 Cysteine proteinases superfamily protein                               |
| 90  | Glyma09g15980 | 17336000:20094000 | 2758000  | OTHER-SEED  | Glycitein 2-4  | PF03372 PTHR12121,PTHR12121:SF20 KOG0620 3.1.-.- K12603 AT3G58580.1 DNase I-like superfamily protein                                                                                  |
| 91  | Glyma10g24430 | 19798500:39380300 | 19581800 | YIELD       | Q_COLYLDIR_10  | PF00957 PTHR21136,PTHR21136:SF46 KOG0859 K08511 GO:0016192,GO:0016021 AT1G04760.1 ATVAMP726,VAMP726 vesicle-associated membrane protein 726                                           |
| 92  | Glyma10g28500 | 19798500:39380300 | 19581800 | YIELD       | Q_COLYLDIR_10  | PF02773,PF00438,PF02772 PTHR11964 KOG1506 2.5.1.6 K00789 GO:0004478,GO:0006556,GO:0005524 AT4G01850.1 AtSAM2,MAT2,SAM-2,SAM2 S-adenosylmethionine synthetase 2                        |
| 93  | Glyma10g28530 | 19798500:39380300 | 19581800 | YIELD       | Q_COLYLDIR_10  | PF00069 PTHR24057 KOG0658 2.7.1.- K00924 GO:0004672,GO:0005524,GO:0006468 AT5G26751.1 ATSK11,SK 11 shaggy-related kinase 11                                                           |
| 94  | Glyma10g28540 | 19798500:39380300 | 19581800 | YIELD       | Q_COLYLDIR_10  | PF00642,PF06220 PTHR16465 GO:0003676,GO:0008270 AT5G26749.1 C2H2 and C2HC zinc fingers superfamily protein                                                                            |
| 95  | Glyma10g28560 | 19798500:39380300 | 19581800 | YIELD       | Q_COLYLDIR_10  | PF01470 PTHR23402 KOG4755 GO:0006508 AT1G56700.1 Peptidase C15, pyroglutamyl peptidase I-like                                                                                         |
| 96  | Glyma10g28600 | 19798500:39380300 | 19581800 | YIELD       | Q_COLYLDIR_10  | PTHR12847 KOG2355 K12608 AT5G02270.1 ATNAP9,NAP9 non-intrinsic ABC protein 9                                                                                                          |
| 97  | Glyma10g28610 | 19798500:39380300 | 19581800 | YIELD       | Q_COLYLDIR_10  | PF01501 PTHR11183,PTHR11183:SF2 GO:0016757 AT2G47180.1 AtGolS1,GolS1 galactinol synthase 1                                                                                            |
| 98  | Glyma10g28620 | 19798500:39380300 | 19581800 | YIELD       | Q_COLYLDIR_10  | PF05832 PTHR13019 KOG3195 GO:0016021 AT1G09330.1                                                                                                                                      |
| 99  | Glyma10g28640 | 19798500:39380300 | 19581800 | YIELD       | Q_COLYLDIR_10  | PF04853 AT1G56560.1 Plant neutral invertase family protein                                                                                                                            |
| 100 | Glyma10g28650 | 19798500:39380300 | 19581800 | YIELD       | Q_COLYLDIR_10  | PTHR10870 GO:0008853,GO:0006281,GO:0005634,GO:0003684 AT4G17760.1 damaged DNA binding;exodeoxyribonuclease IIIs                                                                       |
| 101 | Glyma10g28680 | 19798500:39380300 | 19581800 | YIELD       | Q_COLYLDIR_10  | PF04398 AT1G09310.1 Protein of unknown function, DUF538                                                                                                                               |
| 102 | Glyma10g28690 | 19798500:39380300 | 19581800 | YIELD       | Q_COLYLDIR_10  | PF00557,PF05195 PTHR10804,PTHR10804:SF8 KOG2414 3.4.11.9 K01262 GO:0009987,GO:0004177,GO:0030145 AT1G09300.1 Metallopeptidase M24 family protein                                      |
| 103 | Glyma10g28700 | 19798500:39380300 | 19581800 | YIELD       | Q_COLYLDIR_10  | PF03959 PTHR18838,PTHR18838:SF15 KOG2551 GO:0016787 AT1G09280.1                                                                                                                       |
| 104 | Glyma10g28710 | 19798500:39380300 | 19581800 | YIELD       | Q_COLYLDIR_10  |                                                                                                                                                                                       |
| 105 | Glyma10g28730 | 19798500:39380300 | 19581800 | YIELD       | Q_COLYLDIR_10  | PF09597 AT5G26800.1                                                                                                                                                                   |
| 106 | Glyma10g28740 | 19798500:39380300 | 19581800 | YIELD       | Q_COLYLDIR_10  | AT1G09250.1 basic helix-loop-helix (bHLH) DNA-binding superfamily protein                                                                                                             |
| 107 | Glyma10g28760 | 19798500:39380300 | 19581800 | YIELD       | Q_COLYLDIR_10  | PF06963 PTHR11660:SF1,PTHR11660 KOG2601 GO:0005381,GO:0034755,GO:0016021 AT5G26820.1 ATIREG3,IREG3,MAR1,RTS3 iron-regulated protein 3                                                 |
| 108 | Glyma10g28800 | 19798500:39380300 | 19581800 | YIELD       | Q_COLYLDIR_10  | PF00515 PTHR22904:SF95,PTHR22904 GO:0005515 AT1G56440.1 Tetratricopeptide repeat (TPR)-like superfamily protein                                                                       |
| 109 | Glyma10g28810 | 19798500:39380300 | 19581800 | YIELD       | Q_COLYLDIR_10  | PTHR12444 KOG1877 AT5G26850.1 Uncharacterized protein                                                                                                                                 |
| 110 | Glyma10g28820 | 19798500:39380300 | 19581800 | YIELD       | Q_COLYLDIR_10  | PF03790,PF00046,PF03789,PF03791 PTHR11850:SF45,PTHR11850 KOG0773 GO:0003700,GO:0043565,GO:0006355,GO:0003677,GO:0005634 AT1G23380.1 KNAT6,KNAT6L,KNAT6S KNOTTED1-like homeobox gene 6 |
| 111 | Glyma10g28830 | 19798500:39380300 | 19581800 | YIELD       | Q_COLYLDIR_10  | AT1G56423.1                                                                                                                                                                           |

|     |               |                   |          |       |                 |                                                                                                                                                                                                                    |
|-----|---------------|-------------------|----------|-------|-----------------|--------------------------------------------------------------------------------------------------------------------------------------------------------------------------------------------------------------------|
| 112 | Glyma10g28840 | 19798500:39380300 | 19581800 | YIELD | Q_COLYLDIR_10   | PF00004,PF02190,PF05362 PTHR10046,PTHR10046:SF23 KOG2004 3.4.21.- K08675<br>GO:0005524,GO:0004176,GO:0006508,GO:0004252,GO:0009378,GO:0006281,GO:0006310,GO:0016887<br>AT5G26860.1 LON1,LON_ARA_ARA lon protease 1 |
| 113 | Glyma10g29050 | 19798500:39380300 | 19581800 | YIELD | Q_COLYLDIR_10   | PF00225,PF00307 PTHR24115,PTHR24115:SF135 KOG0239 GO:0003777,GO:0005524,GO:0007018,GO:0005515<br>AT5G27000.1 ATK4,KATD kinesin 4                                                                                   |
| 114 | Glyma10g29060 | 19798500:39380300 | 19581800 | YIELD | Q_COLYLDIR_10   | PF00481 PTHR13832:SF148,PTHR13832 KOG0698 GO:0003824 AT1G09160.1 Protein phosphatase 2C family<br>protein                                                                                                          |
| 115 | Glyma10g29070 | 19798500:39380300 | 19581800 | YIELD | Q_COLYLDIR_10   | PF00436 PTHR10302 KOG1653 GO:0003697,GO:0006260 AT4G11060.1 MTSSB mitochondrially targeted single-<br>stranded DNA binding protein                                                                                 |
| 116 | Glyma10g29080 | 19798500:39380300 | 19581800 | YIELD | Q_COLYLDIR_10   | PF03371 PTHR23142 KOG2889 AT2G40650.1 PRP38 family protein                                                                                                                                                         |
| 117 | Glyma10g29090 | 19798500:39380300 | 19581800 | YIELD | Q_COLYLDIR_10   | PF00400 PTHR22847,PTHR22847:SF52 KOG0266 GO:0005515 AT5G27030.1 TPR3 TOPLESS-related 3                                                                                                                             |
| 118 | Glyma10g29580 | 19798500:39380300 | 19581800 | YIELD | Q_COLYLDIR_10   | PF08356,PF08477,PF08355 PTHR24072,PTHR24072:SF12 KOG1707 GO:0005525,GO:0007264,GO:0005622<br>AT5G27540.1 emb2473,MIRO1 MIRO-related GTP-ase 1                                                                      |
| 119 | Glyma10g29590 | 19798500:39380300 | 19581800 | YIELD | Q_COLYLDIR_10   | PF04893 PTHR12822 KOG3114 GO:0016020 AT5G27490.1 Integral membrane Yip1 family protein                                                                                                                             |
| 120 | Glyma10g29600 | 19798500:39380300 | 19581800 | YIELD | Q_COLYLDIR_10   | PF00587,PF02403 PTHR11778 KOG2509 6.1.1.11 K01875<br>GO:0000166,GO:0004812,GO:0005524,GO:0006418,GO:0005737,GO:0004828,GO:0006434,GO:0006412<br>AT5G27470.1 seryl-tRNA synthetase / serine-tRNA ligase             |
| 121 | Glyma10g29610 | 19798500:39380300 | 19581800 | YIELD | Q_COLYLDIR_10   | AT1G54920.2                                                                                                                                                                                                        |
| 122 | Glyma10g29620 | 19798500:39380300 | 19581800 | YIELD | Q_COLYLDIR_10   | AT3G06035.1 Glycoprotein membrane precursor GPI-anchored                                                                                                                                                           |
| 123 | Glyma10g29630 | 19798500:39380300 | 19581800 | YIELD | Q_COLYLDIR_10   | PF00106 PTHR24315,PTHR24315:SF77 KOG0725 GO:0016491,GO:0008152 AT1G54870.1 NAD(P)-binding<br>Rossmann-fold superfamily protein                                                                                     |
| 124 | Glyma10g29640 | 19798500:39380300 | 19581800 | YIELD | Q_COLYLDIR_10   | PF01425 PTHR11895:SF6,PTHR11895 KOG1211 GO:0016884 AT1G08980.1 AMI1,ATAMI1,ATTOC64-I,TOC64-I<br>amidase 1                                                                                                          |
| 125 | Glyma10g29650 | 19798500:39380300 | 19581800 | YIELD | Q_COLYLDIR_10   | PF00097 PTHR12456,PTHR12456:SF2 AT3G05250.1 RING/U-box superfamily protein                                                                                                                                         |
| 126 | Glyma10g31970 | 19798500:39380300 | 19581800 | YIELD | Q_COLYLDIR_10   | PF00856 PTHR13271 KOG1337 GO:0005515 AT3G56570.1 SET domain-containing protein                                                                                                                                     |
| 127 | Glyma10g37100 | 44778100:59592500 | 14814400 | YIELD | Q_CLAYLDRF_10-1 | PF00076 PTHR24011,PTHR24011:SF180 GO:0003676 AT1G21320.2 nucleotide binding;nucleic acid binding                                                                                                                   |
| 128 | Glyma10g37110 | 44778100:59592500 | 14814400 | YIELD | Q_CLAYLDRF_10-1 | PF00415,PF01363,PF08381 PTHR22870,PTHR22870:SF25 KOG1427 GO:0046872 AT5G42140.1 Regulator of<br>chromosome condensation (RCC1) family with FYVE zinc finger                                                        |
| 129 | Glyma10g37120 | 44778100:59592500 | 14814400 | YIELD | Q_CLAYLDRF_10-1 | PF00069,PF00139 PTHR24420,PTHR24420:SF261 KOG1187 GO:0004672,GO:0005524,GO:0006468,GO:0005488<br>AT5G42120.1 Concanavalin A-like lectin protein kinase family protein                                              |
| 130 | Glyma10g37130 | 44778100:59592500 | 14814400 | YIELD | Q_CLAYLDRF_10-1 | AT1G43770.2 RING/FYVE/PHD zinc finger superfamily protein                                                                                                                                                          |
| 131 | Glyma10g37140 | 44778100:59592500 | 14814400 | YIELD | Q_CLAYLDRF_10-1 | AT1G43770.2 RING/FYVE/PHD zinc finger superfamily protein                                                                                                                                                          |
| 132 | Glyma10g37150 | 44778100:59592500 | 14814400 | YIELD | Q_CLAYLDRF_10-1 | PF00005,PF00664 PTHR24223:SF21,PTHR24223 KOG0054<br>GO:0005524,GO:0016887,GO:0042626,GO:0006810,GO:0005085,GO:0016021 AT3G59140.1 ATM RP14,MRP14<br>multidrug resistance-associated protein 14                     |
| 133 | Glyma10g37160 | 44778100:59592500 | 14814400 | YIELD | Q_CLAYLDRF_10-1 | PF00664,PF00005 PTHR24223:SF21,PTHR24223 KOG0054<br>GO:0005524,GO:0016887,GO:0042626,GO:0006810,GO:0005085,GO:0016021 AT3G59140.1 ATM RP14,MRP14<br>multidrug resistance-associated protein 14                     |
| 134 | Glyma10g37180 | 44778100:59592500 | 14814400 | YIELD | Q_CLAYLDRF_10-1 | PF00282 PTHR11999,PTHR11999:SF4 KOG0629 GO:0016831,GO:0030170,GO:0019752 AT1G43710.1 emb1075<br>Pyridoxal phosphate (PLP)-dependent transferases superfamily protein                                               |
| 135 | Glyma10g37200 | 44778100:59592500 | 14814400 | YIELD | Q_CLAYLDRF_10-1 | PF00704 3.2.1.14 K01183 GO:0004553,GO:0005975 AT5G24090.1 ATCHIA,CHIA chitinase A                                                                                                                                  |
| 136 | Glyma10g37210 | 44778100:59592500 | 14814400 | YIELD | Q_CLAYLDRF_10-1 | PF00224,PF02887 PTHR11817 KOG2323 GO:0000287,GO:0004743,GO:0030955,GO:0006096 AT5G52920.1 PKP-<br>BETA1,PKP1,PKP2 plastidic pyruvate kinase beta subunit 1                                                         |
| 137 | Glyma10g37220 | 44778100:59592500 | 14814400 | YIELD | Q_CLAYLDRF_10-1 | PF04821,PF05029 PTHR22940,PTHR22940:SF4 KOG1974 K03155 AT5G52910.1 ATIM timeless family protein                                                                                                                    |
| 138 | Glyma10g37230 | 44778100:59592500 | 14814400 | YIELD | Q_CLAYLDRF_10-1 | PF08263,PF00560 PTHR24420:SF474,PTHR24420 KOG0472 GO:0005515 AT2G34930.1 disease resistance family<br>protein / LRR family protein                                                                                 |
| 139 | Glyma10g37250 | 44778100:59592500 | 14814400 | YIELD | Q_CLAYLDRF_10-1 | PF00560,PF08263 PTHR24420 KOG0472 GO:0005515 AT2G34930.1 disease resistance family protein / LRR family<br>protein                                                                                                 |

|     |               |                   |          |       |                 |                                                                                                                                                                                   |
|-----|---------------|-------------------|----------|-------|-----------------|-----------------------------------------------------------------------------------------------------------------------------------------------------------------------------------|
| 140 | Glyma10g37260 | 44778100:59592500 | 14814400 | YIELD | Q_CLAYLDRF_10-1 | PF00560,PF08263 PTHR24420,PTHR24420:SF473 KOG0472 GO:0005515 AT2G34930.1 disease resistance family protein / LRR family protein                                                   |
| 141 | Glyma10g37290 | 44778100:59592500 | 14814400 | YIELD | Q_CLAYLDRF_10-1 | PF00560,PF08263 PTHR24420 KOG0472 GO:0005515 AT2G34930.1 disease resistance family protein / LRR family protein                                                                   |
| 142 | Glyma10g37300 | 44778100:59592500 | 14814400 | YIELD | Q_CLAYLDRF_10-1 | PF00560,PF08263 PTHR24420,PTHR24420:SF473 KOG4237 GO:0005515 AT2G34930.1 disease resistance family protein / LRR family protein                                                   |
| 143 | Glyma10g37310 | 44778100:59592500 | 14814400 | YIELD | Q_CLAYLDRF_10-1 | PF00400 PTHR13083 KOG1333 GO:0005515 AT3G49660.1 Transducin/WD40 repeat-like superfamily protein                                                                                  |
| 144 | Glyma10g37320 | 44778100:59592500 | 14814400 | YIELD | Q_CLAYLDRF_10-1 | PF08263,PF00560 PTHR24420,PTHR24420:SF473 KOG0472 GO:0005515 AT2G34930.1 disease resistance family protein / LRR family protein                                                   |
| 145 | Glyma10g37350 | 44778100:59592500 | 14814400 | YIELD | Q_CLAYLDRF_10-1 | PF02517 GO:0016020 AT5G60750.1 CAAX amino terminal protease family protein                                                                                                        |
| 146 | Glyma10g37360 | 44778100:59592500 | 14814400 | YIELD | Q_CLAYLDRF_10-1 | AT5G52900.1                                                                                                                                                                       |
| 147 | Glyma10g37370 | 44778100:59592500 | 14814400 | YIELD | Q_CLAYLDRF_10-1 | PF03595 GO:0055085,GO:0016021 AT5G24030.1 SLAH3 SLAC1 homologue 3                                                                                                                 |
| 148 | Glyma10g37380 | 44778100:59592500 | 14814400 | YIELD | Q_CLAYLDRF_10-1 | PF00004 PTHR23074:SF20,PTHR23074 KOG0737 GO:0005524,GO:0009378,GO:0006281,GO:0006310 AT5G52882.1 P-loop containing nucleoside triphosphate hydrolases superfamily protein         |
| 149 | Glyma10g37390 | 44778100:59592500 | 14814400 | YIELD | Q_CLAYLDRF_10-1 | PF00646 GO:0005515 AT5G52880.1 F-box family protein                                                                                                                               |
| 150 | Glyma10g37400 | 44778100:59592500 | 14814400 | YIELD | Q_CLAYLDRF_10-1 | PF02453 PTHR10994:SF27,PTHR10994 KOG1792 GO:0005783 AT4G23630.1 BT1,RTNLB1 VIRB2-interacting protein 1                                                                            |
| 151 | Glyma10g37410 | 44778100:59592500 | 14814400 | YIELD | Q_CLAYLDRF_10-1 | AT5G52870.1                                                                                                                                                                       |
| 152 | Glyma10g37420 | 44778100:59592500 | 14814400 | YIELD | Q_CLAYLDRF_10-1 | PF00005,PF01061 PTHR19241:SF103,PTHR19241 KOG0061 GO:0005524,GO:0016887,GO:0016020 AT5G52860.1 ABC-2 type transporter family protein                                              |
| 153 | Glyma10g37430 | 44778100:59592500 | 14814400 | YIELD | Q_CLAYLDRF_10-1 | PF07690,PF03105 PTHR24003,PTHR24003:SF230 KOG2325 GO:0022857,GO:0055085,GO:0016021 AT4G22990.2 Major Facilitator Superfamily with SPX (SYG1/Pho81/XPR1) domain-containing protein |
| 154 | Glyma10g37450 | 44778100:59592500 | 14814400 | YIELD | Q_CLAYLDRF_10-1 | PF01535 PTHR24015,PTHR24015:SF131 AT5G52850.1 Pentatricopeptide repeat (PPR) superfamily protein                                                                                  |
| 155 | Glyma10g37460 | 44778100:59592500 | 14814400 | YIELD | Q_CLAYLDRF_10-1 | PF03106 GO:0003700,GO:0043565,GO:0006355 AT5G52830.1 ATWRKY27,WRKY27 WRKY DNA-binding protein 27                                                                                  |
| 156 | Glyma10g37470 | 44778100:59592500 | 14814400 | YIELD | Q_CLAYLDRF_10-1 | PF02423 PTHR13812:SF2,PTHR13812 KOG3007 AT5G52810.1 NAD(P)-binding Rossmann-fold superfamily protein                                                                              |
| 157 | Glyma10g37480 | 44778100:59592500 | 14814400 | YIELD | Q_CLAYLDRF_10-1 | AT3G61920.1                                                                                                                                                                       |
| 158 | Glyma10g37490 | 44778100:59592500 | 14814400 | YIELD | Q_CLAYLDRF_10-1 | PF00403 PTHR22814 KOG1603 GO:0046872,GO:0030001 AT1G01490.1 Heavy metal transport/detoxification superfamily protein                                                              |
| 159 | Glyma10g37500 | 44778100:59592500 | 14814400 | YIELD | Q_CLAYLDRF_10-1 | PF00403 PTHR22814 KOG1603 GO:0046872,GO:0030001 AT1G01490.1 Heavy metal transport/detoxification superfamily protein                                                              |
| 160 | Glyma10g37510 | 44778100:59592500 | 14814400 | YIELD | Q_CLAYLDRF_10-1 | PF00403 PTHR22814:SF56,PTHR22814 KOG1603 GO:0046872,GO:0030001 AT1G01490.1 Heavy metal transport/detoxification superfamily protein                                               |
| 161 | Glyma10g37520 | 44778100:59592500 | 14814400 | YIELD | Q_CLAYLDRF_10-1 | PF00249 PTHR12802:SF30,PTHR12802 KOG0724 GO:0003677 AT5G52660.1 Homeodomain-like superfamily protein                                                                              |
| 162 | Glyma10g37530 | 44778100:59592500 | 14814400 | YIELD | Q_CLAYLDRF_10-1 | PF00295 GO:0004650,GO:0005975 AT3G61490.1 Pectin lyase-like superfamily protein                                                                                                   |
| 163 | Glyma10g37540 | 44778100:59592500 | 14814400 | YIELD | Q_CLAYLDRF_10-1 | PF00295 GO:0004650,GO:0005975 AT3G48950.1 Pectin lyase-like superfamily protein                                                                                                   |
| 164 | Glyma10g37560 | 44778100:59592500 | 14814400 | YIELD | Q_CLAYLDRF_10-1 | PF04116 GO:0005506,GO:0016491,GO:0006633,GO:0055114 AT4G25700.1 B1,BCH1,BETA-OHASE 1,chy1 beta-hydroxylase 1                                                                      |
| 165 | Glyma10g37571 | 44778100:59592500 | 14814400 | YIELD | Q_CLAYLDRF_10-1 | AT4G25670.1                                                                                                                                                                       |
| 166 | Glyma10g37580 | 44778100:59592500 | 14814400 | YIELD | Q_CLAYLDRF_10-1 | PF05903 PTHR12378 KOG0324 AT4G25680.1 PPPDE putative thiol peptidase family protein                                                                                               |
| 167 | Glyma10g37590 | 44778100:59592500 | 14814400 | YIELD | Q_CLAYLDRF_10-1 | PF11721,PF00069 PTHR24420:SF550,PTHR24420 KOG1187 GO:0004672,GO:0005524,GO:0006468 AT5G24010.1 Protein kinase superfamily protein                                                 |
| 168 | Glyma10g37600 | 44778100:59592500 | 14814400 | YIELD | Q_CLAYLDRF_10-1 | PF01794,PF08022,PF08030 PTHR11972,PTHR11972:SF3 KOG0039<br>GO:0005506,GO:0009055,GO:0016491,GO:0050660,GO:0016021,GO:0055114 AT5G23980.1 ATFRO4,FRO4 ferric reduction oxidase 4   |
| 169 | Glyma10g37610 | 44778100:59592500 | 14814400 | YIELD | Q_CLAYLDRF_10-1 | PF01794,PF08030,PF08022 PTHR11972:SF3,PTHR11972<br>GO:0005506,GO:0009055,GO:0016491,GO:0050660,GO:0016021,GO:0055114 AT1G01580.1 ATFRO2,FRD1,FRO2 ferric reduction oxidase 2      |

|     |               |                   |          |       |                 |                                                                                                                                                                                         |
|-----|---------------|-------------------|----------|-------|-----------------|-----------------------------------------------------------------------------------------------------------------------------------------------------------------------------------------|
| 170 | Glyma10g37620 | 44778100:59592500 | 14814400 | YIELD | Q_CLAYLDRF_10-1 |                                                                                                                                                                                         |
| 171 | Glyma10g37630 | 44778100:59592500 | 14814400 | YIELD | Q_CLAYLDRF_10-1 |                                                                                                                                                                                         |
| 172 | Glyma10g37640 | 44778100:59592500 | 14814400 | YIELD | Q_CLAYLDRF_10-1 | PF03514 AT5G52510.1 SCL8 SCARECROW-like 8                                                                                                                                               |
| 173 | Glyma10g37660 | 44778100:59592500 | 14814400 | YIELD | Q_CLAYLDRF_10-1 | PF01554 PTHR11206:SF49,PTHR11206 KOG1347 GO:0015238,GO:0015297,GO:0006855,GO:0055085,GO:0016020 AT4G25640.2 ATDTX35,DTX35,FFT detoxifying efflux carrier 35                             |
| 174 | Glyma10g37690 | 44778100:59592500 | 14814400 | YIELD | Q_CLAYLDRF_10-1 | PF02416 GO:0008565,GO:0015031 AT5G52440.1 HCF106 Bacterial sec-independent translocation protein mttA/Hcf106                                                                            |
| 175 | Glyma10g37700 | 44778100:59592500 | 14814400 | YIELD | Q_CLAYLDRF_10-1 | AT5G52430.1 hydroxyproline-rich glycoprotein family protein                                                                                                                             |
| 176 | Glyma10g37710 | 44778100:59592500 | 14814400 | YIELD | Q_CLAYLDRF_10-1 | PF03600 PTHR10283:SF40,PTHR10283 KOG2639<br>GO:0015105,GO:0016021,GO:0015137,GO:0015746,GO:0055085,GO:0015385,GO:0006814 AT1G02260.1 Divalent ion symporter                             |
| 177 | Glyma10g37720 | 44778100:59592500 | 14814400 | YIELD | Q_CLAYLDRF_10-1 | PF01479,PF00163 PTHR11831,PTHR11831:SF1 KOG4655 K14560 GO:0019843,GO:0005622,GO:0003723 AT5G15750.1 Alpha-L RNA-binding motif/Ribosomal protein S4 family protein                       |
| 178 | Glyma10g37730 | 44778100:59592500 | 14814400 | YIELD | Q_CLAYLDRF_10-1 | PF00069 PTHR24361:SF208,PTHR24361 KOG0198 GO:0004672,GO:0005524,GO:0006468 AT1G63700.1 EMB71,MAPKKK4,YDA Protein kinase superfamily protein                                             |
| 179 | Glyma10g37740 | 44778100:59592500 | 14814400 | YIELD | Q_CLAYLDRF_10-1 |                                                                                                                                                                                         |
| 180 | Glyma10g37750 | 44778100:59592500 | 14814400 | YIELD | Q_CLAYLDRF_10-1 | PF00106 PTHR24320 KOG1208 GO:0016491,GO:0008152,GO:0003824,GO:0050662,GO:0044237 AT4G23430.2 NAD(P)-binding Rossmann-fold superfamily protein                                           |
| 181 | Glyma10g37760 | 44778100:59592500 | 14814400 | YIELD | Q_CLAYLDRF_10-1 | PF00106 PTHR24320 KOG1208 GO:0016491,GO:0008152,GO:0003824,GO:0050662,GO:0044237 AT4G23420.1 NAD(P)-binding Rossmann-fold superfamily protein                                           |
| 182 | Glyma10g37770 | 44778100:59592500 | 14814400 | YIELD | Q_CLAYLDRF_10-1 | AT5G52420.1                                                                                                                                                                             |
| 183 | Glyma10g37780 | 44778100:59592500 | 14814400 | YIELD | Q_CLAYLDRF_10-1 | AT4G25610.1 C2H2-like zinc finger protein                                                                                                                                               |
| 184 | Glyma10g37810 | 44778100:59592500 | 14814400 | YIELD | Q_CLAYLDRF_10-1 | AT3G49055.1                                                                                                                                                                             |
| 185 | Glyma10g37820 | 44778100:59592500 | 14814400 | YIELD | Q_CLAYLDRF_10-1 | PF03893,PF01764 PTHR21493,PTHR21493:SF1 KOG2088 GO:0004806,GO:0006629,GO:0004091,GO:0016042 AT3G49050.1 alpha/beta-Hydrolases superfamily protein                                       |
| 186 | Glyma10g37840 | 44778100:59592500 | 14814400 | YIELD | Q_CLAYLDRF_10-1 | PF01158 PTHR10114 KOG3452 K02920 GO:0003735,GO:0006412,GO:0005622,GO:0005840 AT5G02450.1 Ribosomal protein L36e family protein                                                          |
| 187 | Glyma10g37860 | 44778100:59592500 | 14814400 | YIELD | Q_CLAYLDRF_10-1 | PF02042,PF00564 GO:0005515 AT1G64530.1 Plant regulator RWP-RK family protein                                                                                                            |
| 188 | Glyma10g37870 | 44778100:59592500 | 14814400 | YIELD | Q_CLAYLDRF_10-1 | PF04258 PTHR12174:SF22,PTHR12174 KOG2443 3.4.23.- K09598 GO:0004190,GO:0016021 AT4G33410.1 ATSPPL1,SPPL1 SIGNAL PEPTIDE PEPTIDASE-LIKE 1                                                |
| 189 | Glyma10g37890 | 44778100:59592500 | 14814400 | YIELD | Q_CLAYLDRF_10-1 | PF03283 PTHR21562,PTHR21562:SF1 KOG4287 AT5G23870.3 Pectinacetyltransferase family protein                                                                                              |
| 190 | Glyma10g37900 | 44778100:59592500 | 14814400 | YIELD | Q_CLAYLDRF_10-1 | PF00082,PF12580 PTHR10795:SF2,PTHR10795 KOG1114 3.4.14.10 K01280 GO:0004252,GO:0006508 AT4G20850.1 TPP2 tripeptidyl peptidase ii                                                        |
| 191 | Glyma10g37910 | 44778100:59592500 | 14814400 | YIELD | Q_CLAYLDRF_10-1 | PF00067 PTHR24282,PTHR24282:SF174 KOG0157 GO:0005506,GO:0009055,GO:0016705,GO:0020037,GO:0055114 AT5G52400.1 CYP715A1 cytochrome P450, family 715, subfamily A, polypeptide 1           |
| 192 | Glyma10g37920 | 44778100:59592500 | 14814400 | YIELD | Q_CLAYLDRF_10-1 | PF00067 PTHR24282,PTHR24282:SF174 KOG0157 GO:0005506,GO:0009055,GO:0016705,GO:0020037,GO:0055114 AT5G52400.1 CYP715A1 cytochrome P450, family 715, subfamily A, polypeptide 1           |
| 193 | Glyma10g38770 | 44778100:59592500 | 14814400 | YIELD | Q_CLAYLDRF_10-1 | PF02170,PF08699,PF02171 PTHR22891 KOG1041 K11596 GO:0005515 AT5G43810.1 AGO10,PNH,ZLL Stabilizer of iron transporter SufD / Polynucleotidyl transferase                                 |
| 194 | Glyma10g38790 | 44778100:59592500 | 14814400 | YIELD | Q_CLAYLDRF_10-1 | AT1G02205.3 CER1 Fatty acid hydroxylase superfamily                                                                                                                                     |
| 195 | Glyma10g38810 | 44778100:59592500 | 14814400 | YIELD | Q_CLAYLDRF_10-1 | PF00069,PF00560 PTHR24359,PTHR24359:SF89 KOG0192 GO:0004672,GO:0005524,GO:0006468,GO:0005515 AT1G04210.1 Leucine-rich repeat protein kinase family protein                              |
| 196 | Glyma10g38820 | 44778100:59592500 | 14814400 | YIELD | Q_CLAYLDRF_10-1 | AT2G32980.1                                                                                                                                                                             |
| 197 | Glyma10g38830 | 44778100:59592500 | 14814400 | YIELD | Q_CLAYLDRF_10-1 | PF08423 PTHR22942,PTHR22942:SF13 KOG1434 K10872 GO:0003697,GO:0005524,GO:0006281,GO:0009432 AT3G22880.1 ARLIM15,ATDMC1,DMC1 DNA repair (Rad51) family protein                           |
| 198 | Glyma10g38840 | 44778100:59592500 | 14814400 | YIELD | Q_CLAYLDRF_10-1 | PF12504,PF12481 PTHR11772 AT3G22850.1 Aluminium induced protein with YGL and LRDR motifs                                                                                                |
| 199 | Glyma10g38861 | 44778100:59592500 | 14814400 | YIELD | Q_CLAYLDRF_10-1 | PF00069,PF02138,PF00400 PTHR13743 KOG1786 GO:0004672,GO:0005524,GO:0006468,GO:0005515 AT5G18525.1 protein serine/threonine kinases;protein tyrosine kinases;ATP binding;protein kinases |



|     |               |                   |          |       |                 |                                                                                                                                                      |
|-----|---------------|-------------------|----------|-------|-----------------|------------------------------------------------------------------------------------------------------------------------------------------------------|
| 200 | Glyma10g38880 | 44778100:59592500 | 14814400 | YIELD | Q_CLAYLDRF_10-1 | PF01105 PTHR22811:SF32,PTHR22811 KOG1692 GO:0006810,GO:0016021 AT3G22845.1 emp24/gp25L/p24 family/GOLD family protein                                |
| 201 | Glyma10g38890 | 44778100:59592500 | 14814400 | YIELD | Q_CLAYLDRF_10-1 | PF00248 PTHR11732:SF12,PTHR11732 KOG1575 GO:0055114,GO:0016491 AT1G60710.1 ATB2 NAD(P)-linked oxidoreductase superfamily protein                     |
| 202 | Glyma10g38900 | 44778100:59592500 | 14814400 | YIELD | Q_CLAYLDRF_10-1 | PF00248 PTHR11732:SF12,PTHR11732 KOG1575 GO:0055114,GO:0016491 AT1G60710.1 ATB2 NAD(P)-linked oxidoreductase superfamily protein                     |
| 203 | Glyma10g38910 | 44778100:59592500 | 14814400 | YIELD | Q_CLAYLDRF_10-1 | PF00504 PTHR14154,PTHR14154:SF1 AT3G22840.1 ELIP,ELIP1 Chlorophyll A-B binding family protein                                                        |
| 204 | Glyma10g38920 | 44778100:59592500 | 14814400 | YIELD | Q_CLAYLDRF_10-1 | PF09742 PTHR12895,PTHR12895:SF1 KOG2225 AT1G04200.1                                                                                                  |
| 205 | Glyma10g38930 | 44778100:59592500 | 14814400 | YIELD | Q_CLAYLDRF_10-1 | PF00447 PTHR10015,PTHR10015:SF7 KOG0627 GO:0003700,GO:0043565,GO:0006355,GO:0005634 AT3G22830.1 AT-HSFA6B,HSFA6B heat shock transcription factor A6B |
| 206 | Glyma10g38940 | 44778100:59592500 | 14814400 | YIELD | Q_CLAYLDRF_10-1 | PF03079 PTHR23418 KOG2107 1.13.11.53,1.13.11.54 K08967 GO:0010309,GO:0055114 AT4G14710.1 ATARD2 RmlC-like cupins superfamily protein                 |
| 207 | Glyma10g38950 | 44778100:59592500 | 14814400 | YIELD | Q_CLAYLDRF_10-1 | PF12204 AT4G38225.3                                                                                                                                  |
| 208 | Glyma10g38960 | 44778100:59592500 | 14814400 | YIELD | Q_CLAYLDRF_10-1 | PF03079 PTHR23418 KOG2107 GO:0006355,GO:0010309,GO:0055114 AT5G43850.1 ARD4,ATARD4 RmlC-like cupins superfamily protein                              |
| 209 | Glyma10g38970 | 44778100:59592500 | 14814400 | YIELD | Q_CLAYLDRF_10-1 | PF09425,PF06200 GO:0005515 AT4G14720.1 PPD2,TIFY4B TIFY domain/Divergent CCT motif family protein                                                    |
| 210 | Glyma10g38980 | 44778100:59592500 | 14814400 | YIELD | Q_CLAYLDRF_10-1 | AT4G14723.1                                                                                                                                          |
| 211 | Glyma10g38990 | 44778100:59592500 | 14814400 | YIELD | Q_CLAYLDRF_10-1 | PF05703,PF08458 PTHR24730:SF7,PTHR24730 AT3G22810.1 Plant protein of unknown function (DUF828) with plant pleckstrin homology-like region            |
| 212 | Glyma10g39010 | 44778100:59592500 | 14814400 | YIELD | Q_CLAYLDRF_10-1 | AT4G14746.1                                                                                                                                          |
| 213 | Glyma10g39020 | 44778100:59592500 | 14814400 | YIELD | Q_CLAYLDRF_10-1 | PF00097 AT2G15580.1 RING/U-box superfamily protein                                                                                                   |
| 214 | Glyma10g39030 | 44778100:59592500 | 14814400 | YIELD | Q_CLAYLDRF_10-1 | PF00612 PTHR10699,PTHR10699:SF9 GO:0005515 AT4G14750.1 IQD19 IQ-domain 19                                                                            |
| 215 | Glyma10g39050 | 44778100:59592500 | 14814400 | YIELD | Q_CLAYLDRF_10-1 | PF01015 PTHR11830 KOG1628 K02984 GO:0003735,GO:0006412,GO:0005622,GO:0005840 AT3G04840.1 Ribosomal protein S3Ae                                      |
| 216 | Glyma10g39060 | 44778100:59592500 | 14814400 | YIELD | Q_CLAYLDRF_10-1 | PF00583 GO:0008080,GO:0008152 AT2G32020.1 Acyl-CoA N-acyltransferases (NAT) superfamily protein                                                      |
| 217 | Glyma10g39070 | 44778100:59592500 | 14814400 | YIELD | Q_CLAYLDRF_10-1 | PF07765 PTHR13140:SF97,PTHR13140 KOG0962 AT3G22790.1 Kinase interacting (KIP1-like) family protein                                                   |
| 218 | Glyma10g39080 | 44778100:59592500 | 14814400 | YIELD | Q_CLAYLDRF_10-1 | PF03638 PTHR12446:SF4,PTHR12446 KOG1171 AT4G14770.1 ATTCX2,TCX2 TESMIN/TSO1-like CXC 2                                                               |
| 219 | Glyma10g39100 | 44778100:59592500 | 14814400 | YIELD | Q_CLAYLDRF_10-1 | PF07540,PF03914 PTHR14428:SF5,PTHR14428 KOG2153 AT1G79150.1 binding                                                                                  |
| 220 | Glyma10g39110 | 44778100:59592500 | 14814400 | YIELD | Q_CLAYLDRF_10-1 | PF02469 PTHR10900:SF23,PTHR10900 AT5G60490.1 FLA12 FASCICLIN-like arabinogalactan-protein 12                                                         |
| 221 | Glyma10g39121 | 44778100:59592500 | 14814400 | YIELD | Q_CLAYLDRF_10-1 | PF01301 PTHR23421,PTHR23421:SF31 GO:0004553,GO:0005975,GO:0004565,GO:0009341 AT4G26140.1 BGAL12 beta-galactosidase 12                                |
| 222 | Glyma10g39130 | 44778100:59592500 | 14814400 | YIELD | Q_CLAYLDRF_10-1 | PF03372 PTHR11200:SF29,PTHR11200 KOG0565 AT2G32010.1 CVL1 CVP2 like 1                                                                                |
| 223 | Glyma10g39150 | 44778100:59592500 | 14814400 | YIELD | Q_CLAYLDRF_10-1 | PF00190 GO:0045735 AT3G22640.1 PAP85 cupin family protein                                                                                            |
| 224 | Glyma10g39170 | 44778100:59592500 | 14814400 | YIELD | Q_CLAYLDRF_10-1 | PF00190 GO:0045735 AT3G22640.1 PAP85 cupin family protein                                                                                            |
| 225 | Glyma10g39190 | 44778100:59592500 | 14814400 | YIELD | Q_CLAYLDRF_10-1 | PF00234 AT3G22620.1 Bifunctional inhibitor/lipid-transfer protein/seed storage 2S albumin superfamily protein                                        |
| 226 | Glyma10g39200 | 44778100:59592500 | 14814400 | YIELD | Q_CLAYLDRF_10-1 | AT3G22600.1 Bifunctional inhibitor/lipid-transfer protein/seed storage 2S albumin superfamily protein                                                |
| 227 | Glyma10g39210 | 44778100:59592500 | 14814400 | YIELD | Q_CLAYLDRF_10-1 | PF04570 AT3G22550.1 Protein of unknown function (DUF581)                                                                                             |
| 228 | Glyma10g39220 | 44778100:59592500 | 14814400 | YIELD | Q_CLAYLDRF_10-1 | PF03092 PTHR24003:SF372,PTHR24003 KOG3574 GO:0055085,GO:0016021 AT2G32040.1 Major facilitator superfamily protein                                    |
| 229 | Glyma10g39230 | 44778100:59592500 | 14814400 | YIELD | Q_CLAYLDRF_10-1 | PF07911 AT3G22540.1 Protein of unknown function (DUF1677)                                                                                            |
| 230 | Glyma10g39240 | 44778100:59592500 | 14814400 | YIELD | Q_CLAYLDRF_10-1 | PF04622 GO:0000247,GO:0006696,GO:0005783 AT1G05440.1 C-8 sterol isomerases                                                                           |
| 231 | Glyma10g39250 | 44778100:59592500 | 14814400 | YIELD | Q_CLAYLDRF_10-1 | AT3G22530.1                                                                                                                                          |
| 232 | Glyma10g39270 | 44778100:59592500 | 14814400 | YIELD | Q_CLAYLDRF_10-1 | PF04927 AT3G22490.1 Seed maturation protein                                                                                                          |

|     |               |                   |          |             |                 |                                                                                                                                                                                                      |
|-----|---------------|-------------------|----------|-------------|-----------------|------------------------------------------------------------------------------------------------------------------------------------------------------------------------------------------------------|
| 233 | Glyma10g39290 | 44778100:59592500 | 14814400 | YIELD       | Q_CLAYLDRF_10-1 | PF01535 PTHR24015:SF62,PTHR24015 AT4G14850.1 LOI1,MEF11 Pentatricopeptide repeat (PPR) superfamily protein                                                                                           |
| 234 | Glyma10g39320 | 44778100:59592500 | 14814400 | YIELD       | Q_CLAYLDRF_10-1 | PF00291 PTHR10314,PTHR10314:SF8 KOG1252 GO:0003824,GO:0030170,GO:0008152 AT4G14880.1 ATCYS-3A,CYTACS1,OASA1,OLD3 O-acetylserine (thiol) lyase (OAS-TL) isoform A1                                    |
| 235 | Glyma10g39330 | 44778100:59592500 | 14814400 | YIELD       | Q_CLAYLDRF_10-1 | PF07899 AT3G22440.1 FRIGIDA-like protein                                                                                                                                                             |
| 236 | Glyma10g39350 | 44778100:59592500 | 14814400 | YIELD       | Q_CLAYLDRF_10-1 |                                                                                                                                                                                                      |
| 237 | Glyma10g39370 | 44778100:59592500 | 14814400 | YIELD       | Q_CLAYLDRF_10-1 | PF00475 PTHR23133,PTHR23133:SF2 GO:0004424,GO:0000105 AT3G22425.2 HISN5A,IGPD imidazoleglycerol-phosphate dehydratase                                                                                |
| 238 | Glyma10g39390 | 44778100:59592500 | 14814400 | YIELD       | Q_CLAYLDRF_10-1 | PF00069 PTHR13902:SF38,PTHR13902 KOG0584 GO:0004672,GO:0005524,GO:0006468 AT3G04910.1 ATWNK1,WNK1,ZIK4 with no lysine (K) kinase 1                                                                   |
| 239 | Glyma11g13800 | 9136860:11605270  | 2468410  | WHOLE-PLANT | PI ht 20-1      | PF00232 PTHR10353 KOG0626 3.2.1.21 K01188 GO:0004553,GO:0005975 AT5G44640.1 BGLU13 beta glucosidase 13                                                                                               |
| 240 | Glyma11g13810 | 9136860:11605270  | 2468410  | WHOLE-PLANT | PI ht 20-1      | PF00232 PTHR10353 KOG0626 GO:0004553,GO:0005975 AT2G44480.1 BGLU17 beta glucosidase 17                                                                                                               |
| 241 | Glyma11g13820 | 9136860:11605270  | 2468410  | WHOLE-PLANT | PI ht 20-1      | PF00232 PTHR10353 KOG0626 GO:0004553,GO:0005975 AT5G44640.1 BGLU13 beta glucosidase 13                                                                                                               |
| 242 | Glyma11g13830 | 9136860:11605270  | 2468410  | WHOLE-PLANT | PI ht 20-1      | PF00232 PTHR10353 KOG0626 GO:0004553,GO:0005975 AT5G44640.1 BGLU13 beta glucosidase 13                                                                                                               |
| 243 | Glyma11g13850 | 9136860:11605270  | 2468410  | WHOLE-PLANT | PI ht 20-1      | PF00232 PTHR10353 KOG0626 GO:0004553,GO:0005975 AT2G44480.1 BGLU17 beta glucosidase 17                                                                                                               |
| 244 | Glyma11g13870 | 9136860:11605270  | 2468410  | WHOLE-PLANT | PI ht 20-1      | PF00305,PF01477 PTHR11771:SF2,PTHR11771 GO:0016702,GO:0046872,GO:0055114,GO:0005515 AT3G45140.1 ATLOX2,LOX2 lipoxigenase 2                                                                           |
| 245 | Glyma11g13880 | 9136860:11605270  | 2468410  | WHOLE-PLANT | PI ht 20-1      | PF01477,PF00305 PTHR11771:SF2,PTHR11771 1.13.11.12 K00454 GO:0016702,GO:0046872,GO:0055114,GO:0005515 AT3G45140.1 ATLOX2,LOX2 lipoxigenase 2                                                         |
| 246 | Glyma11g13890 | 9136860:11605270  | 2468410  | WHOLE-PLANT | PI ht 20-1      | PF00168,PF08372 PTHR10024:SF97,PTHR10024 GO:0005515 AT3G57880.1 Calcium-dependent lipid-binding (CaLB domain) plant phosphoribosyltransferase family protein                                         |
| 247 | Glyma11g13920 | 9136860:11605270  | 2468410  | WHOLE-PLANT | PI ht 20-1      | AT5G12900.1                                                                                                                                                                                          |
| 248 | Glyma12g17360 | 16548000:17927000 | 1379000  | OTHER-SEED  | Daidzein 2-2    | PF00954,PF01453,PF07714,PF08276 PTHR24420,PTHR24420:SF703 KOG1187 GO:0004672,GO:0005524,GO:0006468,GO:0048544,GO:0005529 AT4G27290.1 S-locus lectin protein kinase family protein                    |
| 249 | Glyma12g17390 | 16548000:17927000 | 1379000  | OTHER-SEED  | Daidzein 2-2    | PF01397,PF03936 GO:0010333,GO:0016829,GO:0008152,GO:0000287 AT5G23960.2 ATTPS21,TPS21 terpene synthase 21                                                                                            |
| 250 | Glyma12g17450 | 16548000:17927000 | 1379000  | OTHER-SEED  | Daidzein 2-2    | PF00954,PF07714,PF08276,PF01453 PTHR24420:SF703,PTHR24420 KOG1187 GO:0004672,GO:0005524,GO:0006468,GO:0048544,GO:0005529 AT4G27290.1 S-locus lectin protein kinase family protein                    |
| 251 | Glyma12g20890 | 22379200:25629700 | 3250500  | YIELD       | Q_COLYLDRF_12   | PF07714,PF00954,PF08276,PF01453 PTHR24420:SF703,PTHR24420 KOG1187 GO:0004672,GO:0005524,GO:0006468,GO:0048544,GO:0005529 AT4G27290.1 S-locus lectin protein kinase family protein                    |
| 252 | Glyma12g20960 | 22379200:25629700 | 3250500  | YIELD       | Q_COLYLDRF_12   | PTHR10366:SF35,PTHR10366 AT3G53520.4 ATUXS1,UXS1 UDP-glucuronic acid decarboxylase 1                                                                                                                 |
| 253 | Glyma12g21030 | 22379200:25629700 | 3250500  | YIELD       | Q_COLYLDRF_12   | PF00954,PF08276,PF01453,PF07714 PTHR24420,PTHR24420:SF703 KOG1187 GO:0004672,GO:0005524,GO:0006468,GO:0048544,GO:0005529 AT4G27290.1 S-locus lectin protein kinase family protein                    |
| 254 | Glyma12g21040 | 22379200:25629700 | 3250500  | YIELD       | Q_COLYLDRF_12   | PF00954,PF00069,PF08276 PTHR24420,PTHR24420:SF703 KOG1187 GO:0004672,GO:0005524,GO:0006468,GO:0048544 AT4G27290.1 S-locus lectin protein kinase family protein                                       |
| 255 | Glyma12g21070 | 22379200:25629700 | 3250500  | YIELD       | Q_COLYLDRF_12   | PTHR10782:SF4,PTHR10782 AT5G60410.2 ATSI21,SIZ1 DNA-binding protein with MIZ/SP-RING zinc finger, PHD-finger and SAP domain                                                                          |
| 256 | Glyma12g21090 | 22379200:25629700 | 3250500  | YIELD       | Q_COLYLDRF_12   | PF00954,PF00069,PF11883,PF08276,PF01453 PTHR24420,PTHR24420:SF703 KOG1187 GO:0004672,GO:0005524,GO:0006468,GO:0048544,GO:0005529,GO:0004674 AT4G27290.1 S-locus lectin protein kinase family protein |
| 257 | Glyma12g21110 | 22379200:25629700 | 3250500  | YIELD       | Q_COLYLDRF_12   | PF08276,PF01453,PF00954,PF07714 PTHR24420,PTHR24420:SF703 KOG1187 GO:0004672,GO:0005524,GO:0006468,GO:0048544,GO:0005529 AT4G27290.1 S-locus lectin protein kinase family protein                    |

|     |               |                   |         |             |               |                                                                                                                                                                                                                                                     |
|-----|---------------|-------------------|---------|-------------|---------------|-----------------------------------------------------------------------------------------------------------------------------------------------------------------------------------------------------------------------------------------------------|
| 258 | Glyma12g21130 | 22379200:25629700 | 3250500 | YIELD       | Q_COLYLDRF_12 | PF01612 PTHR13620 GO:0003676,GO:0008408,GO:0006139,GO:0005622 AT2G36110.1 Polynucleotidyl transferase, ribonuclease H-like superfamily protein                                                                                                      |
| 259 | Glyma12g21140 | 22379200:25629700 | 3250500 | YIELD       | Q_COLYLDRF_12 | PF00954,PF07714,PF08276,PF01453 PTHR24420,PTHR24420:SF703 KOG1187<br>GO:0004672,GO:0005524,GO:0006468,GO:0048544,GO:0005529 AT4G27290.1 S-locus lectin protein kinase family protein                                                                |
| 260 | Glyma12g21150 | 22379200:25629700 | 3250500 | YIELD       | Q_COLYLDRF_12 | PTHR24093:SF73,PTHR24093 AT5G57110.1 ACA8,AT-ACA8 autoinhibited Ca2+ -ATPase, isoform 8                                                                                                                                                             |
| 261 | Glyma12g21640 | 22379200:25629700 | 3250500 | YIELD       | Q_COLYLDRF_12 | PF00954,PF08276,PF01453,PF07714 PTHR24420,PTHR24420:SF432 KOG1187<br>GO:0004672,GO:0005524,GO:0006468,GO:0048544,GO:0005529 AT1G65790.1 ARK1,RK1 receptor kinase 1                                                                                  |
| 262 | Glyma12g21920 | 22379200:25629700 | 3250500 | YIELD       | Q_COLYLDRF_12 | PTHR10891,PTHR10891:SF148 AT4G27280.1 Calcium-binding EF-hand family protein                                                                                                                                                                        |
| 263 | Glyma12g22160 | 22379200:25629700 | 3250500 | YIELD       | Q_COLYLDRF_12 | PF00582 GO:0006950 AT1G11360.1 Adenine nucleotide alpha hydrolases-like superfamily protein                                                                                                                                                         |
| 264 | Glyma12g22220 | 22379200:25629700 | 3250500 | YIELD       | Q_COLYLDRF_12 | AT1G49430.1 LACS2,LRD2 long-chain acyl-CoA synthetase 2                                                                                                                                                                                             |
| 265 | Glyma12g22230 | 22379200:25629700 | 3250500 | YIELD       | Q_COLYLDRF_12 | PF00067 PTHR24286,PTHR24286:SF25 GO:0005506,GO:0009055,GO:0016705,GO:0020037,GO:0055114<br>AT3G19270.1 CYP707A4 cytochrome P450, family 707, subfamily A, polypeptide 4<br>PF02148,PF00443,PF00627 PTHR24006,PTHR24006:SF36 KOG0944 3.1.2.15 K11836 |
| 266 | Glyma12g22240 | 22379200:25629700 | 3250500 | YIELD       | Q_COLYLDRF_12 | GO:0004221,GO:0006511,GO:0005515,GO:0008270 AT3G20630.1 ATUBP14,PER1,TTN6,UBP14 ubiquitin-specific protease 14                                                                                                                                      |
| 267 | Glyma12g22280 | 22379200:25629700 | 3250500 | YIELD       | Q_COLYLDRF_12 | PF00609,PF00781 PTHR11255,PTHR11255:SF1 GO:0004143,GO:0007205 AT2G20900.2 ATDGK5,DGK5 diacylglycerol kinase 5                                                                                                                                       |
| 268 | Glyma12g22290 | 22379200:25629700 | 3250500 | YIELD       | Q_COLYLDRF_12 | PF01535 PTHR24015 AT1G16480.1 Tetratricopeptide repeat (TPR)-like superfamily protein                                                                                                                                                               |
| 269 | Glyma12g22300 | 22379200:25629700 | 3250500 | YIELD       | Q_COLYLDRF_12 | PF00612,PF00063 PTHR13140,PTHR13140:SF37 KOG0160 GO:0003774,GO:0005524,GO:0016459,GO:0005515<br>AT5G54280.2 ATM2,ATM4,ATMYOS1 myosin 2                                                                                                              |
| 270 | Glyma12g22880 | 22379200:25629700 | 3250500 | YIELD       | Q_COLYLDRF_12 | PF02365 GO:0003677,GO:0006355 AT4G27410.2 ANAC072,RD26 NAC (No Apical Meristem) domain transcriptional regulator superfamily protein                                                                                                                |
| 271 | Glyma12g22960 | 22379200:25629700 | 3250500 | YIELD       | Q_COLYLDRF_12 | PF03398 PTHR12161:SF9,PTHR12161 AT2G14830.1 Regulator of Vps4 activity in the MVB pathway protein                                                                                                                                                   |
| 272 | Glyma12g23000 | 22379200:25629700 | 3250500 | YIELD       | Q_COLYLDRF_12 | PF03358 KOG3135 AT4G27270.1 Quinone reductase family protein                                                                                                                                                                                        |
| 273 | Glyma12g23010 | 22379200:25629700 | 3250500 | YIELD       | Q_COLYLDRF_12 | AT5G49570.1 AtPNG1,PNG1 peptide-N-glycanase 1                                                                                                                                                                                                       |
| 274 | Glyma12g23080 | 22379200:25629700 | 3250500 | YIELD       | Q_COLYLDRF_12 | PF03018 PTHR21495:SF10,PTHR21495 AT4G13580.1 Disease resistance-responsive (dirigent-like protein) family protein                                                                                                                                   |
| 275 | Glyma12g23110 | 22379200:25629700 | 3250500 | YIELD       | Q_COLYLDRF_12 | PF00400 PTHR14221 KOG0283 GO:0005515 AT5G54200.1 Transducin/WD40 repeat-like superfamily protein                                                                                                                                                    |
| 276 | Glyma12g23150 | 22379200:25629700 | 3250500 | YIELD       | Q_COLYLDRF_12 | PF12481,PF12504 PTHR11772 AT4G27450.1 Aluminium induced protein with YGL and LRDR motifs                                                                                                                                                            |
| 277 | Glyma12g23180 | 22379200:25629700 | 3250500 | YIELD       | Q_COLYLDRF_12 | PF04515 PTHR12385,PTHR12385:SF5 KOG1362 AT3G15380.1 Plasma-membrane choline transporter family protein                                                                                                                                              |
| 278 | Glyma12g23200 | 22379200:25629700 | 3250500 | YIELD       | Q_COLYLDRF_12 | PF01357,PF03330 AT3G15370.1 ATEXP12,ATEXPA12,ATHEXP ALPHA 1.24,EXP12,EXPA12 expansin 12                                                                                                                                                             |
| 279 | Glyma12g23220 | 22379200:25629700 | 3250500 | YIELD       | Q_COLYLDRF_12 | PF04389 PTHR10404 GO:0008233,GO:0006508 AT3G54720.1 AMP1,COP2,HPT,MFO1,PT Peptidase M28 family protein                                                                                                                                              |
| 280 | Glyma12g23230 | 22379200:25629700 | 3250500 | YIELD       | Q_COLYLDRF_12 | PF01805,PF04818 PTHR12323 GO:0003723,GO:0006396 AT4G31200.1 SWAP (Suppressor-of-White-APricot)/surp RNA-binding domain-containing protein                                                                                                           |
| 281 | Glyma13g00780 | 0:2239890         | 2239890 | WHOLE-PLANT | Node num 1-5  | PF01263 PTHR11122 KOG1594 GO:0016853,GO:0005975 AT5G57330.1 Galactose mutarotase-like superfamily protein                                                                                                                                           |
| 282 | Glyma13g00790 | 0:2239890         | 2239890 | WHOLE-PLANT | Node num 1-5  | PF00141 1.11.1.7 K00430 GO:0004601,GO:0020037,GO:0006979,GO:0055114 AT2G18980.1 Peroxidase superfamily protein                                                                                                                                      |
| 283 | Glyma13g00800 | 0:2239890         | 2239890 | WHOLE-PLANT | Node num 1-5  | AT5G57340.1                                                                                                                                                                                                                                         |
| 284 | Glyma13g00820 | 0:2239890         | 2239890 | WHOLE-PLANT | Node num 1-5  | PF07466 AT5G57345.1                                                                                                                                                                                                                                 |
| 285 | Glyma13g00840 | 0:2239890         | 2239890 | WHOLE-PLANT | Node num 1-5  | PF00690,PF00122,PF00702 PTHR24093,PTHR24093:SF61 KOG0205 3.6.3.6 K01535<br>GO:0000166,GO:0046872,GO:0003824,GO:0008152,GO:0016020,GO:0015662,GO:0006812,GO:0006754<br>AT4G30190.1 AHA2,HA2,PMA2 H(+)-ATPase 2                                       |
| 286 | Glyma13g00850 | 0:2239890         | 2239890 | WHOLE-PLANT | Node num 1-5  | PF01040 PTHR11048,PTHR11048:SF1 GO:0004659,GO:0016021 AT2G18950.1 ATHPT,HPT1,TPT1,VTE2 homogenisate phytyltransferase 1                                                                                                                             |

|     |               |           |         |             |              |                                                                                                                                                                                                             |
|-----|---------------|-----------|---------|-------------|--------------|-------------------------------------------------------------------------------------------------------------------------------------------------------------------------------------------------------------|
| 287 | Glyma13g00860 | 0:2239890 | 2239890 | WHOLE-PLANT | Node num 1-5 | PF00646,PF07646,PF00989,PF01344 PTHR23244,PTHR23244:SF9 KOG4693 K12115 GO:0005515,GO:0006355 AT5G57360.1 ADO1,FKL2,LKP1,ZTL Galactose oxidase/kelch repeat superfamily protein                              |
| 288 | Glyma13g00870 | 0:2239890 | 2239890 | WHOLE-PLANT | Node num 1-5 | AT2G18910.1 hydroxyproline-rich glycoprotein family protein                                                                                                                                                 |
| 289 | Glyma13g00880 | 0:2239890 | 2239890 | WHOLE-PLANT | Node num 1-5 | PF00400 PTHR22847:SF195,PTHR22847 KOG1963 GO:0005515 AT2G18900.1 Transducin/WD40 repeat-like superfamily protein                                                                                            |
| 290 | Glyma13g00890 | 0:2239890 | 2239890 | WHOLE-PLANT | Node num 1-5 | PF00069 PTHR24420:SF548,PTHR24420 KOG1187 GO:0004672,GO:0005524,GO:0006468 AT2G18890.1 Protein kinase superfamily protein                                                                                   |
| 291 | Glyma13g00900 | 0:2239890 | 2239890 | WHOLE-PLANT | Node num 1-5 | PF08648 KOG3263 K12846 AT5G57370.1                                                                                                                                                                          |
| 292 | Glyma13g00910 | 0:2239890 | 2239890 | WHOLE-PLANT | Node num 1-5 | PF00101 GO:0016984,GO:0015977 AT5G38420.1 Ribulose bisphosphate carboxylase (small chain) family protein                                                                                                    |
| 293 | Glyma13g00920 | 0:2239890 | 2239890 | WHOLE-PLANT | Node num 1-5 | PF00041,PF07227 PTHR21736:SF13,PTHR21736 GO:0005515 AT4G30200.3 VEL1 vernalization5/VIN3-like                                                                                                               |
| 294 | Glyma13g00950 | 0:2239890 | 2239890 | WHOLE-PLANT | Node num 1-5 | PF00847 PTHR11795:SF332,PTHR11795 K09285 GO:0003700,GO:0006355 AT5G57390.1 AIL5,CHO1,EMK AINTEGUMENTA-like 5                                                                                                |
| 295 | Glyma13g00960 | 0:2239890 | 2239890 | WHOLE-PLANT | Node num 1-5 | PF01336,PF08784 PTHR13989,PTHR13989:SF7 KOG3108 K10739 GO:0003676 AT3G02920.1 ATRPA32B,RPA32B Replication protein A, subunit RPA32                                                                          |
| 296 | Glyma13g00970 | 0:2239890 | 2239890 | WHOLE-PLANT | Node num 1-5 | AT4G25850.2 ORP4B OSBP(oxysterol binding protein)-related protein 4B                                                                                                                                        |
| 297 | Glyma13g00980 | 0:2239890 | 2239890 | WHOLE-PLANT | Node num 1-5 | PF11559 PTHR21736:SF19,PTHR21736 AT5G57410.3 Afadin/alpha-actinin-binding protein                                                                                                                           |
| 298 | Glyma13g00990 | 0:2239890 | 2239890 | WHOLE-PLANT | Node num 1-5 | PF00667,PF00175,PF00258 PTHR19384:SF17,PTHR19384 KOG1158 1.6.2.4 K00327 GO:0016491,GO:0055114,GO:0010181 AT4G30210.2 AR2,ATR2 P450 reductase 2                                                              |
| 299 | Glyma13g01000 | 0:2239890 | 2239890 | WHOLE-PLANT | Node num 1-5 | PF00702 PTHR18901 KOG2914 GO:0003824,GO:0008152 AT5G57440.1 GPP2,GS1 Haloacid dehalogenase-like hydrolase (HAD) superfamily protein                                                                         |
| 300 | Glyma13g01020 | 0:2239890 | 2239890 | WHOLE-PLANT | Node num 1-5 | PF00004 PTHR23070:SF1,PTHR23070 KOG0743 GO:0005524 AT5G57480.1 P-loop containing nucleoside triphosphate hydrolases superfamily protein                                                                     |
| 301 | Glyma13g01030 | 0:2239890 | 2239890 | WHOLE-PLANT | Node num 1-5 | PF04893 PTHR21236,PTHR21236:SF1 KOG2946 GO:0016020 AT2G18840.1 Integral membrane Yip1 family protein                                                                                                        |
| 302 | Glyma13g01040 | 0:2239890 | 2239890 | WHOLE-PLANT | Node num 1-5 | PF01459 PTHR11743,PTHR11743:SF14 KOG3126 GO:0008308,GO:0006820,GO:0044070,GO:0055085,GO:0005741 AT5G57490.1 ATVDAC4,VDAC4 voltage dependent anion channel 4                                                 |
| 303 | Glyma13g01050 | 0:2239890 | 2239890 | WHOLE-PLANT | Node num 1-5 | PF03807,PF02153 GO:0004665,GO:0008977,GO:0006571,GO:0055114,GO:0004616,GO:0006098,GO:0016491 AT5G34930.1 arogenate dehydrogenase                                                                            |
| 304 | Glyma13g01060 | 0:2239890 | 2239890 | WHOLE-PLANT | Node num 1-5 | PF01762 PTHR11214,PTHR11214:SF3 KOG2287 GO:0008378,GO:0006486,GO:0016020 AT5G57500.1 Galactosyltransferase family protein                                                                                   |
| 305 | Glyma13g01070 | 0:2239890 | 2239890 | WHOLE-PLANT | Node num 1-5 | AT5G57510.1                                                                                                                                                                                                 |
| 306 | Glyma13g01080 | 0:2239890 | 2239890 | WHOLE-PLANT | Node num 1-5 | PF00501 PTHR24096,PTHR24096:SF43 KOG1176 GO:0003824,GO:0008152 AT3G21240.1 4CL2,AT4CL2 4-coumarate:CoA ligase 2                                                                                             |
| 307 | Glyma13g01090 | 0:2239890 | 2239890 | WHOLE-PLANT | Node num 1-5 | PTHR10042:SF14,PTHR10042 AT5G57520.1 ATZFP2,ZFP2 zinc finger protein 2                                                                                                                                      |
| 308 | Glyma13g01100 | 0:2239890 | 2239890 | WHOLE-PLANT | Node num 1-5 | PF04535 PTHR11615:SF33,PTHR11615 AT4G25830.1 Uncharacterised protein family (UPF0497)                                                                                                                       |
| 309 | Glyma13g01110 | 0:2239890 | 2239890 | WHOLE-PLANT | Node num 1-5 | PF06955,PF00722 PTHR10963:SF14,PTHR10963 2.4.1.207 K08235 GO:0004553,GO:0005975,GO:0016762,GO:0006073,GO:0005618,GO:0048046 AT4G25810.1 XTH23,XTR6 xyloglucan endotransglycosylase 6                        |
| 310 | Glyma13g01120 | 0:2239890 | 2239890 | WHOLE-PLANT | Node num 1-5 | PF06955,PF00722 PTHR10963,PTHR10963:SF14 2.4.1.207 K08235 GO:0004553,GO:0005975,GO:0016762,GO:0006073,GO:0005618,GO:0048046 AT4G25810.1 XTH23,XTR6 xyloglucan endotransglycosylase 6                        |
| 311 | Glyma13g01140 | 0:2239890 | 2239890 | WHOLE-PLANT | Node num 1-5 | PF00722,PF06955 PTHR10963:SF14,PTHR10963 2.4.1.207 K08235 GO:0004553,GO:0005975,GO:0016762,GO:0006073,GO:0005618,GO:0048046 AT5G57560.1 TCH4,XTH22 Xyloglucan endotransglucosylase/hydrolase family protein |

|     |               |                   |         |             |               |                                                                                                                                                                                                                   |
|-----|---------------|-------------------|---------|-------------|---------------|-------------------------------------------------------------------------------------------------------------------------------------------------------------------------------------------------------------------|
| 312 | Glyma13g01150 | 0:2239890         | 2239890 | WHOLE-PLANT | Node num 1-5  | PF00722,PF06955 PTHR10963,PTHR10963:SF14 2.4.1.207 K14504<br>GO:0004553,GO:0005975,GO:0016762,GO:0006073,GO:0005618,GO:0048046 AT5G57560.1 TCH4,XTH22<br>Xyloglucan endotransglucosylase/hydrolase family protein |
| 313 | Glyma13g01160 | 0:2239890         | 2239890 | WHOLE-PLANT | Node num 1-5  | PF07887 K02183 AT5G57580.1 Calmodulin-binding protein                                                                                                                                                             |
| 314 | Glyma13g01170 | 0:2239890         | 2239890 | WHOLE-PLANT | Node num 1-5  | PF00202 PTHR11986:SF4,PTHR11986 KOG1401 2.6.1.62 K00833 GO:0008483,GO:0030170 AT5G57590.1 BIO1<br>adenosylmethionine-8-amino-7-oxononanoate transaminases                                                         |
| 315 | Glyma13g01180 | 0:2239890         | 2239890 | WHOLE-PLANT | Node num 1-5  | PF00370,PF02782 PTHR10196:SF8,PTHR10196 KOG2517 GO:0016773,GO:0005975 AT4G30310.2 FGGY family of<br>carbohydrate kinase                                                                                           |
| 316 | Glyma13g01190 | 0:2239890         | 2239890 | WHOLE-PLANT | Node num 1-5  | PF07714,PF00564 PTHR23257,PTHR23257:SF68 KOG0192 GO:0004672,GO:0005524,GO:0006468,GO:0005515<br>AT5G57610.1 Protein kinase superfamily protein with octicosapeptide/Phox/Bem1p domain                             |
| 317 | Glyma13g01200 | 0:2239890         | 2239890 | WHOLE-PLANT | Node num 1-5  | PF00249 PTHR10641 KOG0048 K09422 GO:0003677 AT5G57620.1 AtMYB36,MYB36 myb domain protein 36                                                                                                                       |
| 318 | Glyma13g01220 | 0:2239890         | 2239890 | WHOLE-PLANT | Node num 1-5  | PF00201 PTHR11926,PTHR11926:SF15 KOG1192 2.4.1.91 K10757 GO:0016758,GO:0008152 AT5G17050.1 UGT78D2<br>UDP-glucosyl transferase 78D2                                                                               |
| 319 | Glyma13g01230 | 0:2239890         | 2239890 | WHOLE-PLANT | Node num 1-5  | PF00188 PTHR10334,PTHR10334:SF7 KOG3017 AT4G30320.1 CAP (Cysteine-rich secretory proteins, Antigen 5, and<br>Pathogenesis-related 1 protein) superfamily                                                          |
| 320 | Glyma13g01250 | 0:2239890         | 2239890 | WHOLE-PLANT | Node num 1-5  | PF00188 PTHR10334:SF7,PTHR10334 AT4G25780.1 CAP (Cysteine-rich secretory proteins, Antigen 5, and<br>Pathogenesis-related 1 protein) superfamily protein                                                          |
| 321 | Glyma13g01260 | 0:2239890         | 2239890 | WHOLE-PLANT | Node num 1-5  | AT5G57655.2 xylose isomerase family protein                                                                                                                                                                       |
| 322 | Glyma13g01270 | 0:2239890         | 2239890 | WHOLE-PLANT | Node num 1-5  | PF00025 PTHR11711 KOG0070 K07942<br>GO:0005525,GO:0007264,GO:0004871,GO:0019001,GO:0007186,GO:0005634,GO:0005737,GO:0005622<br>AT2G24765.1 ARF3,ARL1,ATARL1 ADP-ribosylation factor 3                             |
| 323 | Glyma13g01280 | 0:2239890         | 2239890 | WHOLE-PLANT | Node num 1-5  | PF02779,PF02780 PTHR11624,PTHR11624:SF20 KOG0524 GO:0003824,GO:0008152 AT4G15560.1<br>CLA,CLA1,DEF,DXPS2,DXS Deoxyxylulose-5-phosphate synthase                                                                   |
| 324 | Glyma13g01290 | 0:2239890         | 2239890 | WHOLE-PLANT | Node num 1-5  | PF00643,PF06203 KOG1601 GO:0008270,GO:0005622,GO:0005515 AT5G57660.1 ATCOL5,COL5 CONSTANS-like 5                                                                                                                  |
| 325 | Glyma13g01300 | 0:2239890         | 2239890 | WHOLE-PLANT | Node num 1-5  | PF00069,PF00582 PTHR24420:SF791,PTHR24420 KOG1187 GO:0004672,GO:0005524,GO:0006468,GO:0006950<br>AT5G57670.2 Protein kinase superfamily protein                                                                   |
| 326 | Glyma13g01320 | 0:2239890         | 2239890 | WHOLE-PLANT | Node num 1-5  | PF01423 PTHR11193 KOG1774 K11097 AT2G18740.1 Small nuclear ribonucleoprotein family protein                                                                                                                       |
| 327 | Glyma13g01330 | 0:2239890         | 2239890 | WHOLE-PLANT | Node num 1-5  | PF00060,PF00497 PTHR18966,PTHR18966:SF6<br>GO:0004970,GO:0005234,GO:0016020,GO:0005215,GO:0006810,GO:0030288 AT5G11210.1 ATGLR2.5,GLR2.5<br>glutamate receptor 2.5                                                |
| 328 | Glyma13g01360 | 0:2239890         | 2239890 | WHOLE-PLANT | Node num 1-5  | PF00609,PF00781 PTHR11255:SF32,PTHR11255 GO:0004143,GO:0007205 AT4G30340.1 ATDGK7, DGK7<br>diacylglycerol kinase 7                                                                                                |
| 329 | Glyma13g01370 | 0:2239890         | 2239890 | WHOLE-PLANT | Node num 1-5  | PF01980 PTHR12818 KOG2942 AT4G28020.1                                                                                                                                                                             |
| 330 | Glyma13g01380 | 0:2239890         | 2239890 | WHOLE-PLANT | Node num 1-5  | PF02012 AT5G57700.1 BNR/Asp-box repeat family protein                                                                                                                                                             |
| 331 | Glyma13g01390 | 0:2239890         | 2239890 | WHOLE-PLANT | Node num 1-5  | AT5G57700.3 BNR/Asp-box repeat family protein                                                                                                                                                                     |
| 332 | Glyma13g01400 | 0:2239890         | 2239890 | WHOLE-PLANT | Node num 1-5  | PTHR11638,PTHR11638:SF63 KOG1051 AT5G57710.1 Double Clp-N motif-containing P-loop nucleoside<br>triphosphate hydrolases superfamily protein                                                                       |
| 333 | Glyma13g17100 | 15523600:22497400 | 6973800 | YIELD       | Q_COLYLDRF_13 | PF07911 AT5G20670.1 Protein of unknown function (DUF1677)                                                                                                                                                         |
| 334 | Glyma13g17130 | 15523600:22497400 | 6973800 | YIELD       | Q_COLYLDRF_13 | PF00092 PTHR10338,PTHR10338:SF8 GO:0005515 AT1G19110.1 inter-alpha-trypsin inhibitor heavy chain-related                                                                                                          |
| 335 | Glyma13g17140 | 15523600:22497400 | 6973800 | YIELD       | Q_COLYLDRF_13 | PF06172 K09705 AT1G19130.1                                                                                                                                                                                        |
| 336 | Glyma13g17150 | 15523600:22497400 | 6973800 | YIELD       | Q_COLYLDRF_13 | PF08511 PTHR21427,PTHR21427:SF2 KOG2969 AT1G19140.1                                                                                                                                                               |
| 337 | Glyma13g17160 | 15523600:22497400 | 6973800 | YIELD       | Q_COLYLDRF_13 | PF00069,PF00560,PF08263 PTHR24420,PTHR24420:SF823 KOG1187<br>GO:0004672,GO:0005524,GO:0006468,GO:0005515 AT3G42880.1 Leucine-rich repeat protein kinase family protein                                            |
| 338 | Glyma13g17170 | 15523600:22497400 | 6973800 | YIELD       | Q_COLYLDRF_13 | PF00295 GO:0004650,GO:0005975 AT1G19170.1 Pectin lyase-like superfamily protein                                                                                                                                   |

|     |               |                   |         |       |               |                                                                                                                                                                                                                                |
|-----|---------------|-------------------|---------|-------|---------------|--------------------------------------------------------------------------------------------------------------------------------------------------------------------------------------------------------------------------------|
| 339 | Glyma13g17180 | 15523600:22497400 | 6973800 | YIELD | Q_COLYLDRF_13 | PF09425,PF06200 K13464 GO:0005515 AT1G19180.1 JAZ1,TIFY10A jasmonate-zim-domain protein 1                                                                                                                                      |
| 340 | Glyma13g17190 | 15523600:22497400 | 6973800 | YIELD | Q_COLYLDRF_13 |                                                                                                                                                                                                                                |
| 341 | Glyma13g17200 | 15523600:22497400 | 6973800 | YIELD | Q_COLYLDRF_13 | PF00076 PTHR24012,PTHR24012:SF210 KOG0148 GO:0003676 AT1G17370.1 UBP1B oligouridylylate binding protein 1B                                                                                                                     |
| 342 | Glyma13g17220 | 15523600:22497400 | 6973800 | YIELD | Q_COLYLDRF_13 | PF04570 AT1G74940.1 Protein of unknown function (DUF581)                                                                                                                                                                       |
| 343 | Glyma13g17240 | 15523600:22497400 | 6973800 | YIELD | Q_COLYLDRF_13 | PF02140,PF01301,PF02837 PTHR23421,PTHR23421:SF35 KOG0496<br>GO:0004553,GO:0005975,GO:0005529,GO:0004565,GO:0009341 AT5G20710.1 BGAL7 beta-galactosidase 7                                                                      |
| 344 | Glyma13g17250 | 15523600:22497400 | 6973800 | YIELD | Q_COLYLDRF_13 | PF00847 GO:0003700,GO:0006355 AT1G19210.1 Integrase-type DNA-binding superfamily protein                                                                                                                                       |
| 345 | Glyma13g17260 | 15523600:22497400 | 6973800 | YIELD | Q_COLYLDRF_13 | PF00166 PTHR10772,PTHR10772:SF0 KOG1641 GO:0006457,GO:0005737 AT5G20720.1<br>ATCPN21,CHCPN10,CPN10,CPN20,CPN21 chaperonin 20                                                                                                   |
| 346 | Glyma13g17270 | 15523600:22497400 | 6973800 | YIELD | Q_COLYLDRF_13 | PF06507,PF02362,PF02309 KOG4725 K14486 GO:0006355,GO:0005634,GO:0003677,GO:0009725 AT5G20730.2<br>ARF7,BIP,IAA21,IAA23,IAA25,MSG1,NPH4,TIR5 Transcriptional factor B3 family protein / auxin-responsive factor AUX/IAA-related |
| 347 | Glyma13g17290 | 15523600:22497400 | 6973800 | YIELD | Q_COLYLDRF_13 | PF00109,PF02801 PTHR11712:SF52,PTHR11712 KOG1394 2.3.1.179 K09458 GO:0009058,GO:0003824<br>AT1G74960.1 ATKAS2,FAB1,KAS2 fatty acid biosynthesis 1                                                                              |
| 348 | Glyma13g17300 | 15523600:22497400 | 6973800 | YIELD | Q_COLYLDRF_13 | PF08161 PTHR21576,PTHR21576:SF2 KOG1248 AT2G34357.1 ARM repeat superfamily protein                                                                                                                                             |
| 349 | Glyma13g17320 | 15523600:22497400 | 6973800 | YIELD | Q_COLYLDRF_13 | PF00005 PTHR24221 GO:0005524,GO:0016887 AT3G28390.1 PGP18 P-glycoprotein 18                                                                                                                                                    |
| 350 | Glyma13g17330 | 15523600:22497400 | 6973800 | YIELD | Q_COLYLDRF_13 | AT5G20790.1                                                                                                                                                                                                                    |
| 351 | Glyma13g17340 | 15523600:22497400 | 6973800 | YIELD | Q_COLYLDRF_13 | PF00743 PTHR23023,PTHR23023:SF18 KOG1399 GO:0004499,GO:0050660,GO:0050661,GO:0055114,GO:0016491<br>AT1G19250.1 FMO1 flavin-dependent monooxygenase 1                                                                           |
| 352 | Glyma13g17350 | 15523600:22497400 | 6973800 | YIELD | Q_COLYLDRF_13 | PF00578 PTHR10681:SF5,PTHR10681 KOG0855 1.11.1.15 K03564 GO:0016209,GO:0016491,GO:0055114<br>AT3G26060.1 ATPRX Q Thioredoxin superfamily protein                                                                               |
| 353 | Glyma13g17360 | 15523600:22497400 | 6973800 | YIELD | Q_COLYLDRF_13 | AT1G19240.1                                                                                                                                                                                                                    |
| 354 | Glyma13g17370 | 15523600:22497400 | 6973800 | YIELD | Q_COLYLDRF_13 | PF00111 PTHR23426:SF1,PTHR23426 KOG3309 GO:0009055,GO:0051536 AT4G21090.1 ATMFDX2,MFDX2<br>MITOCHONDRIAL FERREDOXIN 2                                                                                                          |
| 355 | Glyma13g17380 | 15523600:22497400 | 6973800 | YIELD | Q_COLYLDRF_13 | PF02519 K14488 AT3G43120.1 SAUR-like auxin-responsive protein family                                                                                                                                                           |
| 356 | Glyma13g17390 | 15523600:22497400 | 6973800 | YIELD | Q_COLYLDRF_13 | PF01095 PTHR22931,PTHR22931:SF5 GO:0030599,GO:0042545,GO:0005618 AT5G61680.1 Pectin lyase-like<br>superfamily protein                                                                                                          |
| 357 | Glyma13g17400 | 15523600:22497400 | 6973800 | YIELD | Q_COLYLDRF_13 | PF02519 AT5G20820.1 SAUR-like auxin-responsive protein family                                                                                                                                                                  |
| 358 | Glyma13g17421 | 15523600:22497400 | 6973800 | YIELD | Q_COLYLDRF_13 | PF00862,PF00534 PTHR12526,PTHR12526:SF27 KOG0853 2.4.1.13 K00695 GO:0009058,GO:0005985 AT3G43190.1<br>ATSUS4,SUS4 sucrose synthase 4                                                                                           |
| 359 | Glyma13g17440 | 15523600:22497400 | 6973800 | YIELD | Q_COLYLDRF_13 | PF00225,PF11995 PTHR24115,PTHR24115:SF323 KOG0242 GO:0003777,GO:0005524,GO:0007018 AT3G43210.1<br>ATNACK2,NACK2,TES ATP binding microtubule motor family protein                                                               |
| 360 | Glyma13g17450 | 15523600:22497400 | 6973800 | YIELD | Q_COLYLDRF_13 | PF03399 PTHR13022 KOG3252 GO:0006413,GO:0005634,GO:0003743 AT4G33250.1 ATTIF3K1,EIF3K,TIF3K1<br>eukaryotic translation initiation factor 3K                                                                                    |
| 361 | Glyma13g17490 | 15523600:22497400 | 6973800 | YIELD | Q_COLYLDRF_13 | PF02383 PTHR11200,PTHR11200:SF9 KOG1888 GO:0042578 AT3G43220.1 Phosphoinositide phosphatase family<br>protein                                                                                                                  |
| 362 | Glyma13g17500 | 15523600:22497400 | 6973800 | YIELD | Q_COLYLDRF_13 | PF04366,PF01363 PTHR15629 KOG1843 GO:0046872 AT3G43230.1 RING/FYVE/PHD-type zinc finger family protein                                                                                                                         |
| 363 | Glyma13g17510 | 15523600:22497400 | 6973800 | YIELD | Q_COLYLDRF_13 | PF01504,PF00118,PF01363 PTHR11353:SF14,PTHR11353 KOG0230 2.7.1.150 K00921<br>GO:0005524,GO:0044267,GO:0046872,GO:0016307,GO:0046488 AT3G14270.1 FAB1B phosphatidylinositol-4-<br>phosphate 5-kinase family protein             |
| 364 | Glyma13g17530 | 15523600:22497400 | 6973800 | YIELD | Q_COLYLDRF_13 | PF08423 PTHR22942:SF12,PTHR22942 KOG1433 K04482 GO:0003697,GO:0005524,GO:0006281,GO:0009432<br>AT5G20850.1 ATRAD51,RAD51 RAS associated with diabetes protein 51                                                               |
| 365 | Glyma13g17540 | 15523600:22497400 | 6973800 | YIELD | Q_COLYLDRF_13 | PF04043 GO:0004857,GO:0030599 AT2G47340.1 Plant invertase/pectin methylesterase inhibitor superfamily<br>protein                                                                                                               |
| 366 | Glyma13g17550 | 15523600:22497400 | 6973800 | YIELD | Q_COLYLDRF_13 | PF04043,PF01095 PTHR22931:SF5,PTHR22931 GO:0030599,GO:0042545,GO:0005618,GO:0004857 AT2G26450.1<br>Plant invertase/pectin methylesterase inhibitor superfamily                                                                 |

|     |               |                   |         |           |                |                                                                                                                                                                                                 |
|-----|---------------|-------------------|---------|-----------|----------------|-------------------------------------------------------------------------------------------------------------------------------------------------------------------------------------------------|
| 367 | Glyma13g17570 | 15523600:22497400 | 6973800 | YIELD     | Q_COLYLDRLF_13 | PF01095,PF04043 PTHR22931:SF5,PTHR22931 3.1.1.11 K01051<br>GO:0030599,GO:0042545,GO:0005618,GO:0004857 AT3G43270.1 Plant invertase/pectin methylesterase inhibitor superfamily                  |
| 368 | Glyma13g17580 | 15523600:22497400 | 6973800 | YIELD     | Q_COLYLDRLF_13 | PF04455,PF05222,PF03435,PF01262 PTHR11133:SF3,PTHR11133 KOG0172 GO:0016491,GO:0055114 AT4G33150.1 LKR,LKR/SDH,SDH lysine-ketoglutarate reductase/saccharopine dehydrogenase bifunctional enzyme |
| 369 | Glyma13g17600 | 15523600:22497400 | 6973800 | YIELD     | Q_COLYLDRLF_13 | PF07983,PF00332 PTHR16631 GO:0004553,GO:0005975 AT5G20870.1 O-Glycosyl hydrolases family 17 protein                                                                                             |
| 370 | Glyma13g17610 | 15523600:22497400 | 6973800 | YIELD     | Q_COLYLDRLF_13 | PF09324,PF01369 PTHR10663,PTHR10663:SF56 KOG0929 K13462 GO:0005086,GO:0032012,GO:0005622 AT3G43300.1 ATMIN7,BEN1 HOPM interactor 7                                                              |
| 371 | Glyma13g17620 | 15523600:22497400 | 6973800 | YIELD     | Q_COLYLDRLF_13 | PF00097 PTHR22764,PTHR22764:SF31 AT3G43430.1 RING/U-box superfamily protein                                                                                                                     |
| 372 | Glyma13g17630 | 15523600:22497400 | 6973800 | YIELD     | Q_COLYLDRLF_13 | PF01363 PTHR13856:SF64,PTHR13856 GO:0046872 AT2G26210.1 Ankyrin repeat family protein                                                                                                           |
| 373 | Glyma13g17640 | 15523600:22497400 | 6973800 | YIELD     | Q_COLYLDRLF_13 | PF09425,PF06200 GO:0005515 AT5G20900.1 JAZ12,TIFY3B jasmonate-zim-domain protein 12                                                                                                             |
| 374 | Glyma13g17650 | 15523600:22497400 | 6973800 | YIELD     | Q_COLYLDRLF_13 | PTHR13343 KOG3374 AT2G04690.1 Pyridoxamine 5'-phosphate oxidase family protein                                                                                                                  |
| 375 | Glyma13g17660 | 15523600:22497400 | 6973800 | YIELD     | Q_COLYLDRLF_13 | PF03647 PTHR12668 KOG4267 GO:0016020 AT3G43520.1 Transmembrane proteins 14C                                                                                                                     |
| 376 | Glyma13g17670 | 15523600:22497400 | 6973800 | YIELD     | Q_COLYLDRLF_13 | PF00999 PTHR16254 KOG1650 GO:0015299,GO:0006812,GO:0055085,GO:0016021 AT3G17630.1 ATCHX19,CHX19 cation/H+ exchanger 19                                                                          |
| 377 | Glyma13g37040 | 15523600:22497400 | 6973800 | YIELD     | Q_COLYLDRLF_14 | AT2G20585.3 NFD6 nuclear fusion defective 6                                                                                                                                                     |
| 378 | Glyma14g14220 | 10874400:14120960 | 3246560 | LEAF-STEM | Lf lgth 10-4   | PF00234 AT2G45180.1 Bifunctional inhibitor/lipid-transfer protein/seed storage 2S albumin superfamily protein                                                                                   |
| 379 | Glyma14g14230 | 10874400:14120960 | 3246560 | LEAF-STEM | Lf lgth 10-4   |                                                                                                                                                                                                 |
| 380 | Glyma14g14260 | 10874400:14120960 | 3246560 | LEAF-STEM | Lf lgth 10-4   | PF10536 PTHR11668:SF94,PTHR11668 AT2G25010.1 Aminotransferase-like, plant mobile domain family protein                                                                                          |
| 381 | Glyma14g14270 | 10874400:14120960 | 3246560 | LEAF-STEM | Lf lgth 10-4   | PF00156 PTHR11776 KOG1712 2.4.2.7 K00759 GO:0009116 AT5G11160.1 APT5 adenine phosphoribosyltransferase 5                                                                                        |
| 382 | Glyma14g14290 | 10874400:14120960 | 3246560 | LEAF-STEM | Lf lgth 10-4   | AT4G32190.1 Myosin heavy chain-related protein                                                                                                                                                  |
| 383 | Glyma14g14320 | 12692710:14485410 | 1792700 | LEAF-STEM | Stm str 1-3    | PF07714 PTHR22967,PTHR22967:SF2 KOG0198 GO:0004672,GO:0005524,GO:0006468 AT4G32250.1 Protein kinase superfamily protein                                                                         |
| 384 | Glyma14g14350 | 12692710:14485410 | 1792700 | LEAF-STEM | Stm str 1-3    | PTHR14942 AT4G32270.1 Ubiquitin-like superfamily protein                                                                                                                                        |
| 385 | Glyma14g14360 | 12692710:14485410 | 1792700 | LEAF-STEM | Stm str 1-3    | PF03151 PTHR11132 KOG1444 GO:0055085 AT4G32272.1 Nucleotide/sugar transporter family protein                                                                                                    |
| 386 | Glyma14g14370 | 12692710:14485410 | 1792700 | LEAF-STEM | Stm str 1-3    | PF02485 GO:0008375,GO:0016020 AT5G25330.1 Core-2/l-branching beta-1,6-N-acetylglucosaminyltransferase family protein                                                                            |
| 387 | Glyma14g14380 | 12692710:14485410 | 1792700 | LEAF-STEM | Stm str 1-3    | AT3G11760.1                                                                                                                                                                                     |
| 388 | Glyma14g14390 | 12692710:14485410 | 1792700 | LEAF-STEM | Stm str 1-3    | PF00069,PF01453 PTHR24420,PTHR24420:SF926 KOG1187 GO:0004672,GO:0005524,GO:0006468,GO:0005529 AT4G32300.1 SD2-5 S-domain-2 5                                                                    |
| 389 | Glyma14g14400 | 12692710:14485410 | 1792700 | LEAF-STEM | Stm str 1-3    | PF06886 AT4G32330.1 TPX2 (targeting protein for Xklp2) protein family                                                                                                                           |
| 390 | Glyma14g14410 | 12692710:14485410 | 1792700 | LEAF-STEM | Stm str 1-3    | PF00560,PF00646 PTHR23125,PTHR23125:SF106 KOG1947 K14515 GO:0005515 AT2G25490.1 EBF1,FBL6 EIN3-binding F box protein 1                                                                          |
| 391 | Glyma14g14750 | 14223400:21906400 | 7683000 | LEAF-STEM | Lf lgth 10-3   | PF03638 PTHR12446:SF4,PTHR12446 AT3G22780.1 ATTSO1,TSO1 Tesmin/TSO1-like CXC domain-containing protein                                                                                          |
| 392 | Glyma14g14970 | 14223400:21906400 | 7683000 | LEAF-STEM | Lf lgth 10-3   | PF00160 PTHR11071 KOG0879 GO:0003755,GO:0006457 AT3G63400.1 Cyclophilin-like peptidyl-prolyl cis-trans isomerase family protein                                                                 |
| 393 | Glyma14g14990 | 14223400:21906400 | 7683000 | LEAF-STEM | Lf lgth 10-3   | PF02770 PTHR10909,PTHR10909:SF11 GO:0003995,GO:0055114 AT2G35690.1 ACX5 acyl-CoA oxidase 5                                                                                                      |
| 394 | Glyma14g15040 | 14223400:21906400 | 7683000 | LEAF-STEM | Lf lgth 10-3   | PF08698 PTHR21686:SF3,PTHR21686 KOG3100 AT5G30495.1 Fcf2 pre-rRNA processing protein                                                                                                            |
| 395 | Glyma14g15070 | 14223400:21906400 | 7683000 | LEAF-STEM | Lf lgth 10-3   | PF01490 PTHR22950,PTHR22950:SF9 KOG1303 AT2G41190.1 Transmembrane amino acid transporter family protein                                                                                         |
| 396 | Glyma14g15080 | 14223400:21906400 | 7683000 | LEAF-STEM | Lf lgth 10-3   | PF08698 PTHR21686,PTHR21686:SF3 AT1G54770.1 Fcf2 pre-rRNA processing protein                                                                                                                    |
| 397 | Glyma14g15120 | 14223400:21906400 | 7683000 | LEAF-STEM | Lf lgth 10-3   | PF04862 AT5G11420.1 Protein of unknown function, DUF642                                                                                                                                         |
| 398 | Glyma14g17190 | 14223400:21906400 | 7683000 | LEAF-STEM | Lf lgth 10-3   | AT4G31360.1 selenium binding                                                                                                                                                                    |

|     |               |                   |         |           |              |                                                                                                                                                                    |
|-----|---------------|-------------------|---------|-----------|--------------|--------------------------------------------------------------------------------------------------------------------------------------------------------------------|
| 399 | Glyma14g17200 | 14223400:21906400 | 7683000 | LEAF-STEM | Lf lgth 10-3 | PF02469 AT2G24450.1 FLA3 FASCICLIN-like arabinogalactan protein 3 precursor                                                                                        |
| 400 | Glyma15g06360 | 3124420:6737400   | 3612980 | YIELD     | Flr num 1-7  | PF00013 PTHR10288,PTHR10288:SF53 KOG2190 GO:0003723 AT5G64390.1 HEN4 RNA-binding KH domain-containing protein                                                      |
| 401 | Glyma15g06380 | 3124420:6737400   | 3612980 | YIELD     | Flr num 1-7  | PF01031,PF00350,PF02212 PTHR11566:SF12,PTHR11566 KOG0446 3.6.5.5 K01528 GO:0003924,GO:0005525 AT4G33650.1 ADL2,DRP3A dynamin-related protein 3A                    |
| 402 | Glyma15g06390 | 3124420:6737400   | 3612980 | YIELD     | Flr num 1-7  | PF00201 PTHR11926:SF71,PTHR11926 KOG1192 GO:0016758,GO:0008152 AT5G17030.1 UGT78D3 UDP-glucosyl transferase 78D3                                                   |
| 403 | Glyma15g06400 | 3124420:6737400   | 3612980 | YIELD     | Flr num 1-7  | PF00171 PTHR11699,PTHR11699:SF27 KOG2450 1.2.1.27 K00140 GO:0016491,GO:0008152,GO:0055114,GO:0004491 AT2G14170.1 ALDH6B2 aldehyde dehydrogenase 6B2                |
| 404 | Glyma15g06410 | 3124420:6737400   | 3612980 | YIELD     | Flr num 1-7  | PF01535 PTHR24015,PTHR24015:SF182 AT4G31070.1 Tetratricopeptide repeat (TPR)-like superfamily protein                                                              |
| 405 | Glyma15g06420 | 3124420:6737400   | 3612980 | YIELD     | Flr num 1-7  | PF04576 AT1G18265.1 Protein of unknown function, DUF593                                                                                                            |
| 406 | Glyma15g06430 | 3124420:6737400   | 3612980 | YIELD     | Flr num 1-7  | PF00139,PF00069 PTHR24420,PTHR24420:SF438 KOG1187 GO:0004672,GO:0005524,GO:0006468,GO:0005488 AT5G10530.1 Concanavalin A-like lectin protein kinase family protein |
| 407 | Glyma15g06450 | 3124420:6737400   | 3612980 | YIELD     | Flr num 1-7  | PF00400 PTHR18359 KOG2055 K14553 GO:0005515 AT5G14050.1 Transducin/WD40 repeat-like superfamily protein                                                            |
| 408 | Glyma15g06460 | 3124420:6737400   | 3612980 | YIELD     | Flr num 1-7  | PF08240,PF00107 PTHR11695:SF285,PTHR11695 KOG0023 GO:0008270,GO:0016491,GO:0055114 AT1G72680.1 ATCAD1,CAD1 cinnamyl-alcohol dehydrogenase                          |
| 409 | Glyma15g06470 | 3124420:6737400   | 3612980 | YIELD     | Flr num 1-7  | PF00319 PTHR11945:SF19,PTHR11945 GO:0003677,GO:0046983,GO:0043565,GO:0006355,GO:0005634,GO:0003700 AT2G14210.1 AGL44,ANR1 AGAMOUS-like 44                          |
| 410 | Glyma15g06491 | 3124420:6737400   | 3612980 | YIELD     | Flr num 1-7  | PF01486 PTHR11945:SF96,PTHR11945 GO:0003700,GO:0006355,GO:0005634 AT4G37940.1 AGL21 AGAMOUS-like 21                                                                |
| 411 | Glyma15g06510 | 3124420:6737400   | 3612980 | YIELD     | Flr num 1-7  | PF03169 PTHR22601 KOG2262 GO:0055085 AT5G64410.1 ATOPT4,OPT4 oligopeptide transporter 4                                                                            |
| 412 | Glyma15g06520 | 3124420:6737400   | 3612980 | YIELD     | Flr num 1-7  | PF03169 PTHR22601 KOG2262 GO:0055085 AT5G64410.1 ATOPT4,OPT4 oligopeptide transporter 4                                                                            |
| 413 | Glyma15g06530 | 3124420:6737400   | 3612980 | YIELD     | Flr num 1-7  | PF00012 PTHR19375:SF1,PTHR19375 KOG0102 K03283 GO:0000902,GO:0005524 AT5G09590.1 HSC70-5,MTHSC70-2 mitochondrial HSC70 2                                           |
| 414 | Glyma15g06540 | 3124420:6737400   | 3612980 | YIELD     | Flr num 1-7  | PF01544 PTHR21535:SF5,PTHR21535 GO:0046873,GO:0030001,GO:0055085,GO:0016020 AT2G04305.1 Magnesium transporter CorA-like family protein                             |
| 415 | Glyma15g06550 | 3124420:6737400   | 3612980 | YIELD     | Flr num 1-7  | PF04931 PTHR13213,PTHR13213:SF1 KOG1926 GO:0003677,GO:0003887,GO:0006351 AT5G64420.1 DNA polymerase V family                                                       |
| 416 | Glyma15g06560 | 3124420:6737400   | 3612980 | YIELD     | Flr num 1-7  | PF00439 PTHR22880:SF31,PTHR22880 KOG1474 GO:0005515 AT5G65630.1 GTE7 global transcription factor group E7                                                          |
| 417 | Glyma15g06570 | 3124420:6737400   | 3612980 | YIELD     | Flr num 1-7  | PF00439 PTHR22880:SF31,PTHR22880 KOG1474 GO:0005515 AT1G06230.1 GTE4 global transcription factor group E4                                                          |
| 418 | Glyma15g06590 | 3124420:6737400   | 3612980 | YIELD     | Flr num 1-7  | PF00564 GO:0005515 AT5G64430.1 Octicosapeptide/Phox/Bem1p family protein                                                                                           |
| 419 | Glyma15g06600 | 3124420:6737400   | 3612980 | YIELD     | Flr num 1-7  | PF01425 PTHR11895,PTHR11895:SF7 KOG1211 GO:0016884 AT5G64440.1 AtFAAH,FAAH fatty acid amide hydrolase                                                              |
| 420 | Glyma15g06611 | 3124420:6737400   | 3612980 | YIELD     | Flr num 1-7  | AT5G64460.1 Phosphoglycerate mutase family protein                                                                                                                 |
| 421 | Glyma15g06620 | 3124420:6737400   | 3612980 | YIELD     | Flr num 1-7  | AT5G64480.1                                                                                                                                                        |
| 422 | Glyma15g06630 | 3124420:6737400   | 3612980 | YIELD     | Flr num 1-7  | PTHR12170,PTHR12170:SF3 KOG2817 AT4G37880.1 LisH/CRA/RING-U-box domains-containing protein                                                                         |
| 423 | Glyma15g06650 | 3124420:6737400   | 3612980 | YIELD     | Flr num 1-7  | PF01641 PTHR10173:SF0,PTHR10173 KOG0856 GO:0008113,GO:0055114 AT4G21860.1 MSR2 methionine sulfoxide reductase B 2                                                  |
| 424 | Glyma15g06670 | 3124420:6737400   | 3612980 | YIELD     | Flr num 1-7  | PF00719 PTHR10286:SF0,PTHR10286 KOG1626 3.6.1.1 K01507 GO:0000287,GO:0004427,GO:0006796,GO:0005737 AT5G09650.1 AtPpa6,PPa6 pyrophosphorylase 6                     |
| 425 | Glyma15g06680 | 3124420:6737400   | 3612980 | YIELD     | Flr num 1-7  | PF00010 PTHR12565 GO:0030528,GO:0006355 AT4G37850.1 basic helix-loop-helix (bHLH) DNA-binding superfamily protein                                                  |
| 426 | Glyma15g06710 | 3124420:6737400   | 3612980 | YIELD     | Flr num 1-7  | PF00561 PTHR10992:SF12,PTHR10992 KOG1454 3.4.11.5 K01259 AT2G14260.1 PIP proline iminopeptidase                                                                    |
| 427 | Glyma15g06721 | 3124420:6737400   | 3612980 | YIELD     | Flr num 1-7  | AT4G17000.1                                                                                                                                                        |



|     |               |                  |          |           |                |                                                                                                                                                                                                             |
|-----|---------------|------------------|----------|-----------|----------------|-------------------------------------------------------------------------------------------------------------------------------------------------------------------------------------------------------------|
| 428 | Glyma15g06730 | 3124420:6737400  | 3612980  | YIELD     | Flr num 1-7    | PF01266,PF08491 PTHR10835 KOG1298 1.14.99.7 K00511<br>GO:0009055,GO:0016491,GO:0055114,GO:0050660,GO:0008033,GO:0004506,GO:0016021 AT1G58440.1<br>SQE1,XF1 FAD/NAD(P)-binding oxidoreductase family protein |
| 429 | Glyma15g06740 | 3124420:6737400  | 3612980  | YIELD     | Flr num 1-7    | AT4G33690.1                                                                                                                                                                                                 |
| 430 | Glyma15g06750 | 3124420:6737400  | 3612980  | YIELD     | Flr num 1-7    | PF01595 PTHR12064 KOG2118 AT4G33700.1 CBS domain-containing protein with a domain of unknown function<br>(DUF21)                                                                                            |
| 431 | Glyma15g06760 | 3124420:6737400  | 3612980  | YIELD     | Flr num 1-7    | PF07021 AT3G49720.1                                                                                                                                                                                         |
| 432 | Glyma15g06770 | 3124420:6737400  | 3612980  | YIELD     | Flr num 1-7    | PF00188 PTHR10334 KOG3017 AT2G19990.1 PR-1-LIKE pathogenesis-related protein-1-like                                                                                                                         |
| 433 | Glyma15g06780 | 3124420:6737400  | 3612980  | YIELD     | Flr num 1-7    | PF00188 PTHR10334 KOG3017 AT2G14580.1 ATPRB1,PRB1 basic pathogenesis-related protein 1                                                                                                                      |
| 434 | Glyma15g06790 | 3124420:6737400  | 3612980  | YIELD     | Flr num 1-7    | PF00188 PTHR10334 KOG3017 AT2G14580.1 ATPRB1,PRB1 basic pathogenesis-related protein 1                                                                                                                      |
| 435 | Glyma15g06830 | 3124420:6737400  | 3612980  | YIELD     | Flr num 1-7    | PF00188 PTHR10334 AT3G19690.1 CAP (Cysteine-rich secretory proteins, Antigen 5, and Pathogenesis-related 1<br>protein) superfamily protein                                                                  |
| 436 | Glyma15g06840 | 3124420:6737400  | 3612980  | YIELD     | Flr num 1-7    | PF00188 PTHR10334 AT3G19690.1 CAP (Cysteine-rich secretory proteins, Antigen 5, and Pathogenesis-related 1<br>protein) superfamily protein                                                                  |
| 437 | Glyma15g06860 | 3124420:6737400  | 3612980  | YIELD     | Flr num 1-7    | PF00010 PTHR23042,PTHR23042:SF20 GO:0030528,GO:0006355 AT5G54680.1 bHLH105,ILR3 basic helix-loop-helix<br>(bHLH) DNA-binding superfamily protein                                                            |
| 438 | Glyma15g06870 | 3124420:6737400  | 3612980  | YIELD     | Flr num 1-7    | PF00085 PTHR10438:SF12,PTHR10438 KOG0907 GO:0045454,GO:0015035,GO:0009055,GO:0006662 AT1G11530.1<br>ATCXS1,CXS1 C-terminal cysteine residue is changed to a serine 1                                        |
| 439 | Glyma15g06880 | 3124420:6737400  | 3612980  | YIELD     | Flr num 1-7    | PF00225 PTHR24115,PTHR24115:SF170 KOG0239 K10405 GO:0003777,GO:0005524,GO:0007018 AT4G21270.1<br>ATK1,KATA,KATAP kinesin 1                                                                                  |
| 440 | Glyma15g06890 | 3124420:6737400  | 3612980  | YIELD     | Flr num 1-7    | PF04504 AT1G11510.1 DNA-binding storekeeper protein-related transcriptional regulator                                                                                                                       |
| 441 | Glyma15g06900 | 3124420:6737400  | 3612980  | YIELD     | Flr num 1-7    | PF03737 K02553 AT5G56260.1 Ribonuclease E inhibitor RraA/Dimethylmenaquinone methyltransferase                                                                                                              |
| 442 | Glyma15g06910 | 3124420:6737400  | 3612980  | YIELD     | Flr num 1-7    | PF06749 AT4G21310.1 Protein of unknown function (DUF1218)                                                                                                                                                   |
| 443 | Glyma15g06920 | 3124420:6737400  | 3612980  | YIELD     | Flr num 1-7    | AT4G27240.1 zinc finger (C2H2 type) family protein                                                                                                                                                          |
| 444 | Glyma15g06930 | 3124420:6737400  | 3612980  | YIELD     | Flr num 1-7    | AT1G79660.1                                                                                                                                                                                                 |
| 445 | Glyma15g06941 | 3124420:6737400  | 3612980  | YIELD     | Flr num 1-7    | PF03000 GO:0004871,GO:0009416 AT3G22104.1 Phototropic-responsive NPH3 family protein                                                                                                                        |
| 446 | Glyma15g06950 | 3124420:6737400  | 3612980  | YIELD     | Flr num 1-7    | PF00010 PTHR11514,PTHR11514:SF7 GO:0030528,GO:0006355 AT4G21330.1 DYT1 basic helix-loop-helix (bHLH)<br>DNA-binding superfamily protein                                                                     |
| 447 | Glyma15g11260 | 6107000:22655000 | 16548000 | LEAF-STEM | Lflt shape 8-8 | PTHR22764:SF49,PTHR22764 AT5G22000.1 RHF2A RING-H2 group F2A                                                                                                                                                |
| 448 | Glyma15g11270 | 6107000:22655000 | 16548000 | LEAF-STEM | Lflt shape 8-8 | PF00892,PF03151 PTHR11132 KOG1441 GO:0016020,GO:0055085 AT1G61800.1 ATGPT2,GPT2 glucose-6-<br>phosphate/phosphate translocator 2                                                                            |
| 449 | Glyma15g11290 | 6107000:22655000 | 16548000 | LEAF-STEM | Lflt shape 8-8 | PF00232 PTHR10353 KOG0626 3.2.1.21 K05350 GO:0004553,GO:0005975 AT4G21760.1 BGLU47 beta-glucosidase<br>47                                                                                                   |
| 450 | Glyma15g11300 | 6107000:22655000 | 16548000 | LEAF-STEM | Lflt shape 8-8 | PF00849 PTHR10436:SF42,PTHR10436 KOG1919 GO:0003723,GO:0009982,GO:0001522,GO:0009451 AT4G21770.1<br>Pseudouridine synthase family protein                                                                   |
| 451 | Glyma15g11310 | 6107000:22655000 | 16548000 | LEAF-STEM | Lflt shape 8-8 | PF00962 PTHR11409,PTHR11409:SF21 KOG1097 3.5.4.4 K01488 GO:0019239,GO:0009168 AT4G04880.1<br>adenosine/AMP deaminase family protein                                                                         |
| 452 | Glyma15g11320 | 6107000:22655000 | 16548000 | LEAF-STEM | Lflt shape 8-8 |                                                                                                                                                                                                             |
| 453 | Glyma15g11330 | 6107000:22655000 | 16548000 | LEAF-STEM | Lflt shape 8-8 | PF00069 PTHR24420:SF700,PTHR24420 KOG1187 GO:0004672,GO:0005524,GO:0006468 AT3G20530.1 Protein<br>kinase superfamily protein                                                                                |
| 454 | Glyma15g11340 | 6107000:22655000 | 16548000 | LEAF-STEM | Lflt shape 8-8 | PF01535 PTHR24015:SF20,PTHR24015 AT1G61870.1 PPR336 pentatricopeptide repeat 336                                                                                                                            |
| 455 | Glyma15g11350 | 6107000:22655000 | 16548000 | LEAF-STEM | Lflt shape 8-8 | PF04511 PTHR11009 KOG0858 K13989 AT4G04860.1 DER2.2 DERLIN-2.2                                                                                                                                              |
| 456 | Glyma15g11360 | 6107000:22655000 | 16548000 | LEAF-STEM | Lflt shape 8-8 | PF00011 PTHR11527,PTHR11527:SF14 AT4G21870.1 HSP20-like chaperones superfamily protein                                                                                                                      |
| 457 | Glyma15g11370 | 6107000:22655000 | 16548000 | LEAF-STEM | Lflt shape 8-8 | PF01753 GO:0008270 AT4G21890.1                                                                                                                                                                              |
| 458 | Glyma15g11380 | 6107000:22655000 | 16548000 | LEAF-STEM | Lflt shape 8-8 | PF00076 PTHR24012:SF67,PTHR24012 KOG0148 GO:0003676 AT1G11650.2 ATRBP45B,RBP45B RNA-binding<br>(RRM/RBD/RNP motifs) family protein                                                                          |

|     |               |                  |          |               |                |                                                                                                                                                                                                                   |
|-----|---------------|------------------|----------|---------------|----------------|-------------------------------------------------------------------------------------------------------------------------------------------------------------------------------------------------------------------|
| 459 | Glyma15g14890 | 6107000:22655000 | 16548000 | LEAF-STEM     | Lflt shape 8-8 | AT3G17100.1 sequence-specific DNA binding transcription factors                                                                                                                                                   |
| 460 | Glyma15g14900 | 6107000:22655000 | 16548000 | LEAF-STEM     | Lflt shape 8-8 | PF00481 PTHR13832:SF97,PTHR13832 KOG0700 GO:0003824 AT3G17090.1 Protein phosphatase 2C family protein                                                                                                             |
| 461 | Glyma15g14930 | 6107000:22655000 | 16548000 | LEAF-STEM     | Lflt shape 8-8 | PF00657 PTHR22835,PTHR22835:SF39 GO:0016788,GO:0006629 AT2G23540.1 GDSL-like Lipase/Acylhydrolase superfamily protein                                                                                             |
| 462 | Glyma15g14950 | 6107000:22655000 | 16548000 | LEAF-STEM     | Lflt shape 8-8 | PF00657 PTHR22835:SF39,PTHR22835 GO:0016788,GO:0006629 AT2G23540.1 GDSL-like Lipase/Acylhydrolase superfamily protein                                                                                             |
| 463 | Glyma15g14970 | 6107000:22655000 | 16548000 | LEAF-STEM     | Lflt shape 8-8 | KOG3450 AT3G06610.1 DNA-binding enhancer protein-related                                                                                                                                                          |
| 464 | Glyma15g14980 | 6107000:22655000 | 16548000 | LEAF-STEM     | Lflt shape 8-8 | PF01590,PF00989,PF00360,PF00512,PF08446,PF02518 PTHR24423 K12121<br>GO:0008020,GO:0006355,GO:0009584,GO:0018298,GO:0000155,GO:0007165,GO:0016020,GO:0005515,GO:0005524 AT2G18790.1 HY3,OOP1,PHYB phytochrome B    |
| 465 | Glyma15g15010 | 6107000:22655000 | 16548000 | LEAF-STEM     | Lflt shape 8-8 | PF00285,PF00549 PTHR26330 KOG1254 GO:0046912,GO:0044262,GO:0003824,GO:0008152 AT5G49460.1 ACLB-2 ATP citrate lyase subunit B 2                                                                                    |
| 466 | Glyma15g15020 | 6107000:22655000 | 16548000 | LEAF-STEM     | Lflt shape 8-8 | PF00285,PF00549 PTHR26330 KOG1254 2.3.3.8 K01648 GO:0046912,GO:0044262,GO:0003824,GO:0008152 AT3G06650.1 ACLB-1 ATP-citrate lyase B-1                                                                             |
| 467 | Glyma16g09930 | 8471000:12411000 | 3940000  | REPROD-PERIOD | Fflr 9-3       | PF04564 PTHR26224,PTHR26224:SF27 KOG4642 GO:0004842,GO:0016567,GO:0000151 AT3G07370.1 ATCHIP,CHIP carboxyl terminus of HSC70-interacting protein                                                                  |
| 468 | Glyma16g10340 | 8471000:12411000 | 3940000  | REPROD-PERIOD | Fflr 9-3       | PF01582,PF00931 PTHR11017,PTHR11017:SF130<br>GO:0043531,GO:0005515,GO:0007165,GO:0005622,GO:0045087,GO:0031224,GO:0004888,GO:0006915,GO:0005524 AT5G36930.2 Disease resistance protein (TIR-NBS-LRR class) family |
| 469 | Glyma19g02430 | 0:21124310       | 21124310 | YIELD         | Pod num 1-9    | PF07847 PTHR22966 KOG4281 GO:0047800,GO:0055114 AT5G39890.1 Protein of unknown function (DUF1637)                                                                                                                 |
| 470 | Glyma19g02440 | 0:21124310       | 21124310 | YIELD         | Pod num 1-9    | PF03106 GO:0003700,GO:0043565,GO:0006355 AT5G15130.1 ATWRKY72,WRKY72 WRKY DNA-binding protein 72                                                                                                                  |
| 471 | Glyma19g02450 | 0:21124310       | 21124310 | YIELD         | Pod num 1-9    | PF01263 PTHR10091 KOG1604 GO:0016853,GO:0005975,GO:0019318 AT3G47800.1 Galactose mutarotase-like superfamily protein                                                                                              |
| 472 | Glyma19g02790 | 0:21124310       | 21124310 | YIELD         | Pod num 1-9    | PF08574 AT2G30280.1 DMS4,RDM4 RNA-directed DNA methylation 4                                                                                                                                                      |
| 473 | Glyma19g02810 | 0:21124310       | 21124310 | YIELD         | Pod num 1-9    | PF03330,PF01357 AT2G03090.1 ATEXP15,ATEXPA15,ATHEXP ALPHA 1.3,EXP15,EXPA15 expansin A15                                                                                                                           |
| 474 | Glyma19g02840 | 0:21124310       | 21124310 | YIELD         | Pod num 1-9    | PF00013 PTHR10288:SF53,PTHR10288 KOG2190 GO:0003723 AT5G15270.1 RNA-binding KH domain-containing protein                                                                                                          |
| 475 | Glyma19g04340 | 0:21124310       | 21124310 | YIELD         | Pod num 1-9    | PF00097 PTHR22766,PTHR22766:SF20 KOG3039 AT5G15790.1 RING/U-box superfamily protein                                                                                                                               |
| 476 | Glyma19g04390 | 0:21124310       | 21124310 | YIELD         | Pod num 1-9    | PF00005 PTHR19241:SF95,PTHR19241 GO:0005524,GO:0016887 AT1G15520.1 ABCG40,ATABCG40,ATPDR12,PDR12 pleiotropic drug resistance 12                                                                                   |
| 477 | Glyma19g04410 | 0:21124310       | 21124310 | YIELD         | Pod num 1-9    | PF01190 AT5G15780.1 Pollen Ole e 1 allergen and extensin family protein                                                                                                                                           |
| 478 | Glyma19g04430 | 0:21124310       | 21124310 | YIELD         | Pod num 1-9    | PF01190 AT5G15780.1 Pollen Ole e 1 allergen and extensin family protein                                                                                                                                           |
| 479 | Glyma19g04450 | 0:21124310       | 21124310 | YIELD         | Pod num 1-9    | PF00230 PTHR19139,PTHR19139:SF30 KOG0223 GO:0005215,GO:0006810,GO:0016020 AT3G16240.1 AQP1,ATTIP2;1,DELTA-TIP,DELTA-TIP1,TIP2;1 delta tonoplast integral protein                                                  |
| 480 | Glyma19g04470 | 0:21124310       | 21124310 | YIELD         | Pod num 1-9    | PF01190 AT5G15780.1 Pollen Ole e 1 allergen and extensin family protein                                                                                                                                           |
| 481 | Glyma19g04540 | 0:21124310       | 21124310 | YIELD         | Pod num 1-9    | PF01190 AT5G15780.1 Pollen Ole e 1 allergen and extensin family protein                                                                                                                                           |
| 482 | Glyma19g04570 | 0:21124310       | 21124310 | YIELD         | Pod num 1-9    | PF00201 PTHR11926:SF15,PTHR11926 KOG1192 GO:0016758,GO:0008152 AT1G22340.1 AtUGT85A7,UGT85A7 UDP-glucosyl transferase 85A7                                                                                        |
| 483 | Glyma19g04610 | 0:21124310       | 21124310 | YIELD         | Pod num 1-9    | PF00201 PTHR11926:SF15,PTHR11926 KOG1192 GO:0016758,GO:0008152 AT1G22340.1 AtUGT85A7,UGT85A7 UDP-glucosyl transferase 85A7<br>PF01612,PF00476 PTHR10133                                                           |
| 484 | Glyma19g04810 | 0:21124310       | 21124310 | YIELD         | Pod num 1-9    | GO:0003677,GO:0003887,GO:0006260,GO:0003676,GO:0008408,GO:0006139,GO:0005622 AT1G50840.1 POLGAMMA2 polymerase gamma 2                                                                                             |
| 485 | Glyma19g04820 | 0:21124310       | 21124310 | YIELD         | Pod num 1-9    | PF10250 AT5G15740.1 O-fucosyltransferase family protein                                                                                                                                                           |
| 486 | Glyma19g04853 | 0:21124310       | 21124310 | YIELD         | Pod num 1-9    | PF00153 PTHR24089:SF45,PTHR24089 AT5G42130.1 Mitochondrial substrate carrier family protein                                                                                                                       |
| 487 | Glyma19g04870 | 0:21124310       | 21124310 | YIELD         | Pod num 1-9    | PF00069 PTHR24420,PTHR24420:SF741 KOG1187 GO:0004672,GO:0005524,GO:0006468 AT5G15730.1 Protein kinase superfamily protein                                                                                         |

|     |               |                   |          |             |              |                                                                                                                                           |
|-----|---------------|-------------------|----------|-------------|--------------|-------------------------------------------------------------------------------------------------------------------------------------------|
| 488 | Glyma19g04890 | 0:21124310        | 21124310 | YIELD       | Pod num 1-9  | PF00657 PTHR22835:SF39,PTHR22835 GO:0016788,GO:0006629 AT5G15720.1 GLIP7 GDSL-motif lipase 7                                              |
| 489 | Glyma19g04900 | 0:21124310        | 21124310 | YIELD       | Pod num 1-9  | PF00326 PTHR12277,PTHR12277:SF8 KOG1552 GO:0008236,GO:0006508 AT3G30380.2 alpha/beta-Hydrolases superfamily protein                       |
| 490 | Glyma19g05700 | 6081390:7517520   | 1436130  | WHOLE-PLANT | Pl ht 22-1   | PF03005 PTHR13533:SF3,PTHR13533 AT5G15900.1 TBL19 TRICHOME BIREFRINGENCE-LIKE 19                                                          |
| 491 | Glyma19g05740 | 6081390:7517520   | 1436130  | WHOLE-PLANT | Pl ht 22-1   | PF03005 PTHR13533,PTHR13533:SF3 AT5G15900.1 TBL19 TRICHOME BIREFRINGENCE-LIKE 19                                                          |
| 492 | Glyma19g05760 | 6081390:7517520   | 1436130  | WHOLE-PLANT | Pl ht 22-1   | PF03005 PTHR13533:SF3,PTHR13533 AT5G15900.1 TBL19 TRICHOME BIREFRINGENCE-LIKE 19                                                          |
| 493 | Glyma20g10920 | 15332510:16035800 | 703290   | YIELD       | Flr num 1-12 | PF07714 PTHR24420:SF897,PTHR24420 KOG1187 GO:0004672,GO:0005524,GO:0006468 AT1G14370.1 APK2A,PBL2 protein kinase 2A                       |
| 494 | Glyma20g10960 | 15332510:16035800 | 703290   | YIELD       | Flr num 1-12 | PF00069 PTHR24056,PTHR24056:SF77 KOG0600 2.7.11.22 K08819 GO:0004672,GO:0005524,GO:0006468 AT5G10270.1 CDKC;1 cyclin-dependent kinase C;1 |
| 495 | Glyma20g11040 | 15332510:16035800 | 703290   | YIELD       | Flr num 1-12 | PF00249 PTHR10641,PTHR10641:SF30 KOG0048 GO:0003677 AT5G06100.2 ATMYB33,MYB33 myb domain protein 33                                       |
| 496 | Glyma20g11150 | 15332510:16035800 | 703290   | YIELD       | Flr num 1-12 | PF05221 GO:0004013,GO:0006730 AT4G13940.4 ATSAHH1,EMB1395,HOG1,MEE58,SAHH1 S-adenosyl-L-homocysteine hydrolase                            |

**Supplementary Table 10. Gene list (270 genes) of the artificial selection region harboring QTL associated with major traits.**

| No | Gene          | Start:End              | Size    | Trait       | QTLs           | Annotation                                                                                                                                                                                                                                                 |
|----|---------------|------------------------|---------|-------------|----------------|------------------------------------------------------------------------------------------------------------------------------------------------------------------------------------------------------------------------------------------------------------|
| 1  | Glyma03g26060 | <b>3699336:4200251</b> | 500915  | YIELD       | Q_COLYLDIR_5-2 | PF02298 GO:0005507,GO:0009055 AT2G32300.1 UCC1 uclacyanin 1                                                                                                                                                                                                |
| 2  | Glyma03g26060 | <b>3699336:4200251</b> | 500915  | YIELD       | Q_COLYLDIR_5-2 | PF02298 GO:0005507,GO:0009055 AT1G72230.1 Cupredoxin superfamily protein                                                                                                                                                                                   |
| 3  | Glyma03g26080 | <b>3699336:4200251</b> | 500915  | YIELD       | Q_COLYLDIR_5-2 | PF00573 PTHR10746 KOG1624 GO:0003735,GO:0006412,GO:0005840 AT1G07320.1 RPL4 ribosomal protein L4                                                                                                                                                           |
| 4  | Glyma03g26540 | <b>3699336:4200251</b> | 500915  | YIELD       | Q_COLYLDIR_5-2 | AT4G37930.1 SHM1,SHMT1,STM serine transhydroxymethyltransferase 1                                                                                                                                                                                          |
| 5  | Glyma03g26550 | <b>3699336:4200251</b> | 500915  | YIELD       | Q_COLYLDIR_5-2 | AT3G20810.2 2-oxoglutarate (2OG) and Fe(II)-dependent oxygenase superfamily protein                                                                                                                                                                        |
| 6  | Glyma03g26580 | <b>3699336:4200251</b> | 500915  | YIELD       | Q_COLYLDIR_5-2 | PF00179 PTHR24067:SF8,PTHR24067 KOG0896 GO:0016881 AT3G52560.1 MMZ4,UEV1D,UEV1D-4 ubiquitin E2 variant 1D-4                                                                                                                                                |
| 7  | Glyma03g26590 | <b>3699336:4200251</b> | 500915  | YIELD       | Q_COLYLDIR_5-2 | PF00106 PTHR24322 KOG0725 GO:0016491,GO:0008152 AT3G51680.1 NAD(P)-binding Rossmann-fold superfamily protein                                                                                                                                               |
| 8  | Glyma03g30640 | <b>3699336:4200251</b> | 500915  | YIELD       | Q_COLYLDIR_5-2 | PF03171 KOG4176 GO:0016491,GO:0016706,GO:0055114 AT4G02940.1 oxidoreductase, 2OG-Fe(II) oxygenase family protein                                                                                                                                           |
| 9  | Glyma03g30650 | <b>3699336:4200251</b> | 500915  | YIELD       | Q_COLYLDIR_5-2 |                                                                                                                                                                                                                                                            |
| 10 | Glyma03g30660 | <b>3699336:4200251</b> | 500915  | YIELD       | Q_COLYLDIR_5-2 | AT2G48090.1                                                                                                                                                                                                                                                |
| 11 | Glyma03g30673 | <b>3699336:4200251</b> | 500915  | YIELD       | Q_COLYLDIR_5-2 | AT2G42190.1                                                                                                                                                                                                                                                |
| 12 | Glyma03g30686 | <b>3699336:4200251</b> | 500915  | YIELD       | Q_COLYLDIR_5-2 | PF00225 PTHR24115:SF176,PTHR24115 GO:0003777,GO:0005524,GO:0007018 AT2G21380.1 Kinesin motor family protein                                                                                                                                                |
| 13 | Glyma03g30700 | <b>3699336:4200251</b> | 500915  | YIELD       | Q_COLYLDIR_5-2 |                                                                                                                                                                                                                                                            |
| 14 | Glyma05g04580 | <b>3183520:4168520</b> | 985000  | WHOLE-PLANT | PI ht 24-3     | PF00635 PTHR10809,PTHR10809:SF6 KOG0439 GO:0005198 AT2G45140.1 PVA12 plant VAP homolog 12                                                                                                                                                                  |
| 15 | Glyma05g04590 | <b>3183520:4168520</b> | 985000  | WHOLE-PLANT | PI ht 24-3     | PF00026 PTHR13683:SF98,PTHR13683 KOG1339 GO:0004190,GO:0006508 AT4G16563.1 Eukaryotic aspartyl protease family protein                                                                                                                                     |
| 16 | Glyma05g04600 | <b>3183520:4168520</b> | 985000  | WHOLE-PLANT | PI ht 24-3     | PF01596 PTHR11006:SF2,PTHR11006 KOG1501 2.1.1.- K11438 GO:0008171,GO:0008168 AT4G16570.1 ATPRMT7,PRMT7 protein arginine methyltransferase 7                                                                                                                |
| 17 | Glyma07g04090 | <b>2758000:4925000</b> | 2167000 | OTHER-SEED  | Daidzein 2-3   | PF08381 PTHR22870:SF36,PTHR22870 AT3G14000.1 ATBRXL2,BRX-LIKE2 DZC (Disease resistance/zinc finger/chromosome condensation-like region) domain containing protein                                                                                          |
| 18 | Glyma07g04100 | <b>2758000:4925000</b> | 2167000 | OTHER-SEED  | Daidzein 2-3   | PF06972 PTHR12758,PTHR12758:SF13 AT3G13990.2 Kinase-related protein of unknown function (DUF1296)                                                                                                                                                          |
| 19 | Glyma07g11470 | <b>6698000:9850000</b> | 3152000 | WHOLE-PLANT | PI ht 19-6     | PF00069 PTHR24055,PTHR24055:SF69 KOG0660<br>GO:0004672,GO:0005524,GO:0006468,GO:0016773,GO:0009103,GO:0016020 AT3G18040.1 MPK9 MAP kinase 9                                                                                                                |
| 20 | Glyma07g11495 | <b>6698000:9850000</b> | 3152000 | WHOLE-PLANT | PI ht 19-6     | PF00641 PTHR23111,PTHR23111:SF11 KOG4198 GO:0008270,GO:0005622 AT1G48570.1 zinc finger (Ran-binding) family protein                                                                                                                                        |
| 21 | Glyma07g11520 | <b>6698000:9850000</b> | 3152000 | WHOLE-PLANT | PI ht 19-6     | PF00043,PF00462 PTHR12782 KOG3029 GO:0009055,GO:0015035,GO:0045454 AT5G42150.1 Glutathione S-transferase family protein                                                                                                                                    |
| 22 | Glyma07g11540 | <b>6698000:9850000</b> | 3152000 | WHOLE-PLANT | PI ht 19-6     | PF00168 PTHR26357,PTHR26357:SF5 KOG1030 GO:0005515 AT3G17980.1 Calcium-dependent lipid-binding (CaLB domain) family protein                                                                                                                                |
| 23 | Glyma07g11550 | <b>6698000:9850000</b> | 3152000 | WHOLE-PLANT | PI ht 19-6     | PF03547 K13947 GO:0055085,GO:0016021 AT1G73590.1 ATPIN1,PIN1 Auxin efflux carrier family protein                                                                                                                                                           |
| 24 | Glyma07g11560 | <b>6698000:9850000</b> | 3152000 | WHOLE-PLANT | PI ht 19-6     | PF08060,PF08156,PF01798 PTHR10894 KOG2573 K14564 AT1G56110.1 NOP56 homolog of nucleolar protein NOP56                                                                                                                                                      |
| 25 | Glyma07g11580 | <b>6698000:9850000</b> | 3152000 | WHOLE-PLANT | PI ht 19-6     | PF08241 PTHR10108,PTHR10108:SF328 KOG1269 2.1.1.103 K05929<br>GO:0004719,GO:0006464,GO:0008168,GO:0008610,GO:0008757,GO:0009312,GO:0009877,GO:0008152 AT3G18000.1 NMT1,PEAMT,XPL1 S-adenosyl-L-methionine-dependent methyltransferases superfamily protein |

|    |               |                         |         |             |                |                                                                                                                                                                                                                                  |
|----|---------------|-------------------------|---------|-------------|----------------|----------------------------------------------------------------------------------------------------------------------------------------------------------------------------------------------------------------------------------|
| 26 | Glyma07g11590 | <b>6698000:9850000</b>  | 3152000 | WHOLE-PLANT | PI ht 19-6     | PF03643 PTHR12233,PTHR12233:SF2 KOG2717 GO:0007034,GO:0030904 AT1G48550.1 Vacuolar protein sorting-associated protein 26                                                                                                         |
| 27 | Glyma07g11600 | <b>6698000:9850000</b>  | 3152000 | WHOLE-PLANT | PI ht 19-6     | PF01263 PTHR10091 KOG1604 GO:0016853,GO:0005975,GO:0019318 AT3G17940.1 Galactose mutarotase-like superfamily protein                                                                                                             |
| 28 | Glyma07g11630 | <b>6698000:9850000</b>  | 3152000 | WHOLE-PLANT | PI ht 19-6     | AT3G17950.1                                                                                                                                                                                                                      |
| 29 | Glyma07g11650 | <b>7683000:11623000</b> | 3940000 | WHOLE-PLANT | Cnpy ht 2-1    | PF02104 PTHR23427,PTHR23427:SF2 KOG1563 GO:0016020 AT3G17910.1 SURF1 Surfeit locus 1 cytochrome c oxidase biogenesis                                                                                                             |
| 30 | Glyma07g11660 | <b>7683000:11623000</b> | 3940000 | WHOLE-PLANT | Cnpy ht 2-1    | PF00234 AT1G73550.1 Bifunctional inhibitor/lipid-transfer protein/seed storage 2S albumin superfamily protein                                                                                                                    |
| 31 | Glyma07g11670 | <b>7683000:11623000</b> | 3940000 | WHOLE-PLANT | Cnpy ht 2-1    | PF00069 PTHR24356:SF87,PTHR24356 KOG0606 GO:0004672,GO:0005524,GO:0006468 AT3G17850.1 Protein kinase superfamily protein                                                                                                         |
| 32 | Glyma07g11680 | <b>7683000:11623000</b> | 3940000 | WHOLE-PLANT | Cnpy ht 2-1    | PF00560,PF08263,PF00069 PTHR24420,PTHR24420:SF537 KOG1187<br>GO:0004672,GO:0005524,GO:0006468,GO:0005515 AT1G48480.1 RKL1 receptor-like kinase 1                                                                                 |
| 33 | Glyma07g11690 | <b>7683000:11623000</b> | 3940000 | WHOLE-PLANT | Cnpy ht 2-1    | PF00684,PF00226,PF01556 PTHR24076:SF80,PTHR24076 KOG0715<br>GO:0031072,GO:0051082,GO:0006457 AT3G17830.1 Molecular chaperone Hsp40/DnaJ family protein                                                                           |
| 34 | Glyma07g11700 | <b>7683000:11623000</b> | 3940000 | WHOLE-PLANT | Cnpy ht 2-1    | PF03168 PTHR19957:SF11,PTHR19957 AT2G35980.1 ATNHL10,NHL10, YLS9 Late embryogenesis abundant (LEA) hydroxyproline-rich glycoprotein family                                                                                       |
| 35 | Glyma07g11710 | <b>7683000:11623000</b> | 3940000 | WHOLE-PLANT | Cnpy ht 2-1    | PF03168 PTHR19957:SF11,PTHR19957 AT2G35980.1 ATNHL10,NHL10, YLS9 Late embryogenesis abundant (LEA) hydroxyproline-rich glycoprotein family                                                                                       |
| 36 | Glyma07g11720 | <b>7683000:11623000</b> | 3940000 | WHOLE-PLANT | Cnpy ht 2-1    | PF03168 PTHR19957:SF11,PTHR19957 AT2G35980.1 ATNHL10,NHL10, YLS9 Late embryogenesis abundant (LEA) hydroxyproline-rich glycoprotein family                                                                                       |
| 37 | Glyma09g06250 | <b>3370670:8049420</b>  | 4678750 | OTHER-SEED  | Sd cadmium 1-1 | PF00702,PF00690,PF00122 PTHR24093:SF61,PTHR24093 KOG0205 3.6.3.6 K01535<br>GO:0000166,GO:0046872,GO:0003824,GO:0008152,GO:0016020,GO:0015662,GO:0006812,GO:0006754 AT4G30190.1 AHA2,HA2,PMA2 H(-)-ATPase 2                       |
| 38 | Glyma09g06260 | <b>3370670:8049420</b>  | 4678750 | OTHER-SEED  | Sd cadmium 1-1 | PF01582,PF00931 PTHR11017:SF20,PTHR11017 KOG4658<br>GO:0043531,GO:0005515,GO:0007165,GO:0005622,GO:0045087,GO:0031224,GO:0004888,GO:0006915,GO:0005524 AT5G17680.1 disease resistance protein (TIR-NBS-LRR class), putative      |
| 39 | Glyma09g06290 | <b>3370670:8049420</b>  | 4678750 | OTHER-SEED  | Sd cadmium 1-1 | AT4G30180.1 sequence-specific DNA binding transcription factors;transcription regulators                                                                                                                                         |
| 40 | Glyma09g06300 | <b>3370670:8049420</b>  | 4678750 | OTHER-SEED  | Sd cadmium 1-1 | PF01106 PTHR11178 KOG2358 GO:0005506,GO:0051536,GO:0016226 AT4G25910.1 ATCNFU3,NFU3 NFU domain protein 3                                                                                                                         |
| 41 | Glyma09g06310 | <b>3370670:8049420</b>  | 4678750 | OTHER-SEED  | Sd cadmium 1-1 | AT5G57340.1                                                                                                                                                                                                                      |
| 42 | Glyma09g06320 | <b>3370670:8049420</b>  | 4678750 | OTHER-SEED  | Sd cadmium 1-1 | PTHR23303:SF5,PTHR23303 AT3G62360.1 Carbohydrate-binding-like fold                                                                                                                                                               |
| 43 | Glyma09g06330 | <b>3370670:8049420</b>  | 4678750 | OTHER-SEED  | Sd cadmium 1-1 | PF07725,PF01582,PF00931 PTHR11017:SF20,PTHR11017 KOG4658<br>GO:0043531,GO:0005515,GO:0007165,GO:0005622,GO:0045087,GO:0031224,GO:0004888,GO:0006915,GO:0005524 AT5G41540.1 Disease resistance protein (TIR-NBS-LRR class) family |
| 44 | Glyma09g07240 | <b>3370670:8049420</b>  | 4678750 | OTHER-SEED  | Sd cadmium 1-1 | AT1G22770.1 FB,GI gigantea protein (GI)                                                                                                                                                                                          |
| 45 | Glyma09g07250 | <b>3370670:8049420</b>  | 4678750 | OTHER-SEED  | Sd cadmium 1-1 | PF01535 PTHR24015 AT1G12700.1 ATP binding;nucleic acid binding;helicases                                                                                                                                                         |
| 46 | Glyma09g07270 | <b>3370670:8049420</b>  | 4678750 | OTHER-SEED  | Sd cadmium 1-1 |                                                                                                                                                                                                                                  |
| 47 | Glyma09g07290 | <b>3370670:8049420</b>  | 4678750 | OTHER-SEED  | Sd cadmium 1-1 | PF01535 PTHR24015 AT1G12700.1 ATP binding;nucleic acid binding;helicases                                                                                                                                                         |
| 48 | Glyma09g07310 | <b>3370670:8049420</b>  | 4678750 | OTHER-SEED  | Sd cadmium 1-1 | PF00504 PTHR21649 GO:0016020,GO:0009765 AT1G29930.1 AB140,CAB1,CAB140,LHCB1.3 chlorophyll A/B binding protein 1                                                                                                                  |
| 49 | Glyma09g07320 | <b>3370670:8049420</b>  | 4678750 | OTHER-SEED  | Sd cadmium 1-1 | PF04864,PF04863 PTHR11751,PTHR11751:SF162 GO:0016740,GO:0030170,GO:0009058,GO:0016846 AT1G34060.1 Pyridoxal phosphate (PLP)-dependent transferases superfamily protein                                                           |
| 50 | Glyma09g07330 | <b>3370670:8049420</b>  | 4678750 | OTHER-SEED  | Sd cadmium 1-1 | PF04863,PF04864 PTHR11751,PTHR11751:SF162 GO:0016846 AT1G34060.1 Pyridoxal phosphate (PLP)-dependent transferases superfamily protein                                                                                            |
| 51 | Glyma09g07340 | <b>3370670:8049420</b>  | 4678750 | OTHER-SEED  | Sd cadmium 1-1 | PF04864,PF04863 PTHR11751,PTHR11751:SF162 GO:0016740,GO:0030170,GO:0009058,GO:0016846 AT1G34060.1 Pyridoxal phosphate (PLP)-dependent transferases superfamily protein                                                           |
| 52 | Glyma09g07360 | <b>3370670:8049420</b>  | 4678750 | OTHER-SEED  | Sd cadmium 1-1 | PF01565,PF09265 PTHR13878,PTHR13878:SF19 KOG1231 1.5.99.12 K00279<br>GO:0008762,GO:0016491,GO:0050660,GO:0055114,GO:0019139,GO:0009690 AT5G56970.1 ATCKX3,CKX3 cytokinin oxidase 3                                               |

|    |               |                          |          |            |                |                                                                                                                                                                                                                               |
|----|---------------|--------------------------|----------|------------|----------------|-------------------------------------------------------------------------------------------------------------------------------------------------------------------------------------------------------------------------------|
| 53 | Glyma09g07400 | <b>3370670:8049420</b>   | 4678750  | OTHER-SEED | Sd cadmium 1-1 | PF00154 PTHR22942,PTHR22942:SF1 KOG1433 K03553<br>GO:0003697,GO:0005524,GO:0006281,GO:0009432 AT2G19490.1 recA DNA recombination family protein                                                                               |
| 54 | Glyma09g07410 | <b>3370670:8049420</b>   | 4678750  | OTHER-SEED | Sd cadmium 1-1 | PF00956 PTHR11875:SF7,PTHR11875 KOG1507 GO:0006334,GO:0005634 AT5G56950.1 NAP1;3,NFA03,NFA3 nucleosome assembly protein 1;3                                                                                                   |
| 55 | Glyma09g07420 | <b>3370670:8049420</b>   | 4678750  | OTHER-SEED | Sd cadmium 1-1 | PF00886 PTHR12919:SF5,PTHR12919 KOG3419 GO:0003735,GO:0006412,GO:0005622,GO:0005840 AT5G56940.1 Ribosomal protein S16 family protein                                                                                          |
| 56 | Glyma09g07430 | <b>3370670:8049420</b>   | 4678750  | OTHER-SEED | Sd cadmium 1-1 | PF01975 GO:0016787 AT1G72880.1 Survival protein SurE-like phosphatase/nucleotidase                                                                                                                                            |
| 57 | Glyma09g07440 | <b>3370670:8049420</b>   | 4678750  | OTHER-SEED | Sd cadmium 1-1 | PF12313,PF11900,PF00651 K14508 GO:0005515 AT1G64280.1 ATNPR1,NIM1,NPR1,SAI1 regulatory protein (NPR1)<br>AT1G72690.1                                                                                                          |
| 58 | Glyma09g07450 | <b>3370670:8049420</b>   | 4678750  | OTHER-SEED | Sd cadmium 1-1 | AT4G33050.3 EDA39 calmodulin-binding family protein                                                                                                                                                                           |
| 59 | Glyma09g07470 | <b>3370670:8049420</b>   | 4678750  | OTHER-SEED | Sd cadmium 1-1 | PF00069 PTHR11909:SF18,PTHR11909 KOG1163 2.7.11.1 K02218<br>GO:0004672,GO:0005524,GO:0006468 AT4G26100.1 CK1,CKL1 casein kinase 1                                                                                             |
| 60 | Glyma09g07490 | <b>3370670:8049420</b>   | 4678750  | OTHER-SEED | Sd cadmium 1-1 | PF03062 PTHR10408 KOG0380 2.3.1.20,2.3.1.75,2.3.1.76 K11155 AT2G19450.1<br>ABX45,AS11,ATDGAT,DGAT1,RDS1,TAG1 membrane bound O-acyl transferase (MBOAT) family                                                                 |
| 61 | Glyma09g07520 | <b>3370670:8049420</b>   | 4678750  | OTHER-SEED | Sd cadmium 1-1 | PF00924 KOG4629 GO:0055085,GO:0016020 AT5G12080.1 ATMSL10,MSL10 mechanosensitive channel of small conductance-like 10                                                                                                         |
| 62 | Glyma09g07900 | <b>3370670:8049420</b>   | 4678750  | OTHER-SEED | Sd cadmium 1-1 | PF03357 PTHR10476:SF4,PTHR10476 KOG3230 K12191 GO:0015031 AT2G06530.1 VPS2.1 SNF7 family protein                                                                                                                              |
| 63 | Glyma09g07920 | <b>3370670:8049420</b>   | 4678750  | OTHER-SEED | Sd cadmium 1-1 | PF08381 PTHR22870:SF36,PTHR22870 AT5G20540.1 ATBRXL4,BRX-LIKE4,BRXL4 BREVIS RADIX-like 4                                                                                                                                      |
| 64 | Glyma09g07930 | <b>3370670:8049420</b>   | 4678750  | OTHER-SEED | Sd cadmium 1-1 | PF01241 GO:0015979,GO:0009522,GO:0016020 AT1G30380.1 PSAK photosystem I subunit K                                                                                                                                             |
| 65 | Glyma09g11460 | <b>10047000:11623000</b> | 1576000  | POD        | Pod mat 5-3    | PF04050,PF02854 PTHR12839 KOG2051 K14327 GO:0005515,GO:0016070 AT2G39260.1 binding;RNA binding                                                                                                                                |
| 66 | Glyma09g11480 | <b>10047000:11623000</b> | 1576000  | POD        | Pod mat 5-3    |                                                                                                                                                                                                                               |
| 67 | Glyma09g11500 | <b>10047000:11623000</b> | 1576000  | POD        | Pod mat 5-3    |                                                                                                                                                                                                                               |
| 68 | Glyma09g11510 | <b>10047000:11623000</b> | 1576000  | POD        | Pod mat 5-3    | PF01535 PTHR24015:SF145,PTHR24015 AT4G21300.1 Tetratricopeptide repeat (TPR)-like superfamily protein                                                                                                                         |
| 69 | Glyma10g15910 | <b>11504800:20885940</b> | 9381140  | POD        | Pod num 2-2    | PF00756 PTHR10061 KOG3101 3.1.2.12 K01070<br>GO:0008236,GO:0006508,GO:0018738,GO:0016023,GO:0004091 AT2G41530.1 ATSFHG,SFGH S-formylglutathione hydrolase                                                                     |
| 70 | Glyma10g15950 | <b>11504800:20885940</b> | 9381140  | POD        | Pod num 2-2    | PF00011 PTHR11527,PTHR11527:SF44 AT2G27140.1 HSP20-like chaperones superfamily protein                                                                                                                                        |
| 71 | Glyma10g28060 | <b>19798500:39380300</b> | 19581800 | YIELD      | Q_COLYLDIR_10  | AT5G03050.1                                                                                                                                                                                                                   |
| 72 | Glyma10g28070 | <b>19798500:39380300</b> | 19581800 | YIELD      | Q_COLYLDIR_10  | AT3G62010.1                                                                                                                                                                                                                   |
| 73 | Glyma10g28080 | <b>19798500:39380300</b> | 19581800 | YIELD      | Q_COLYLDIR_10  | PF01399 PTHR15350,PTHR15350:SF2 KOG2753 GO:0005515 AT5G15610.2 Proteasome component (PCI) domain protein                                                                                                                      |
| 74 | Glyma10g28100 | <b>19798500:39380300</b> | 19581800 | YIELD      | Q_COLYLDIR_10  | PF00098,PF00271,PF08152,PF00270 PTHR24031:SF161,PTHR24031 KOG0331<br>GO:0003676,GO:0008270,GO:0005524,GO:0008026,GO:0004386,GO:0003723,GO:0005634 AT5G26742.1 emb1138 DEAD box RNA helicase (RH3)                             |
| 75 | Glyma10g28110 | <b>19798500:39380300</b> | 19581800 | YIELD      | Q_COLYLDIR_10  | PF03619 PTHR23423:SF2,PTHR23423 KOG2641 AT3G05940.1 Protein of unknown function (DUF300)                                                                                                                                      |
| 76 | Glyma10g28130 | <b>19798500:39380300</b> | 19581800 | YIELD      | Q_COLYLDIR_10  | AT5G26731.1                                                                                                                                                                                                                   |
| 77 | Glyma10g28140 | <b>19798500:39380300</b> | 19581800 | YIELD      | Q_COLYLDIR_10  | AT5G64860.1 DPE1 disproportionating enzyme                                                                                                                                                                                    |
| 78 | Glyma10g28150 | <b>19798500:39380300</b> | 19581800 | YIELD      | Q_COLYLDIR_10  |                                                                                                                                                                                                                               |
| 79 | Glyma10g28170 | <b>19798500:39380300</b> | 19581800 | YIELD      | Q_COLYLDIR_10  | PF01590,PF00512,PF08446,PF02518,PF00989,PF00360 K12120<br>GO:0008020,GO:0006355,GO:0009584,GO:0018298,GO:0000155,GO:0007165,GO:0016020,GO:0005515,GO:0005524 AT1G09570.1 FHY2,FRE1,HY8,PHYA phytochrome A                     |
| 80 | Glyma10g28180 | <b>19798500:39380300</b> | 19581800 | YIELD      | Q_COLYLDIR_10  | PF03950,PF00749,PF00043 PTHR10119:SF16,PTHR10119 KOG1147 6.1.1.17 K01885<br>GO:0000166,GO:0005524,GO:0016876,GO:0043039,GO:0005737,GO:0004812,GO:0006418,GO:0006412 AT5G26710.1 Glutaryl/glutaminyI-tRNA synthetase, class Ic |

|     |               |                          |          |       |               |                                                                                                                                                                                                                     |
|-----|---------------|--------------------------|----------|-------|---------------|---------------------------------------------------------------------------------------------------------------------------------------------------------------------------------------------------------------------|
| 81  | Glyma10g28190 | <b>19798500:39380300</b> | 19581800 | YIELD | Q_COLYLDIR_10 | PF00190 GO:0045735 AT3G62020.1 GLP10 germin-like protein 10                                                                                                                                                         |
| 82  | Glyma10g28530 | <b>19798500:39380300</b> | 19581800 | YIELD | Q_COLYLDIR_10 | PF00069 PTHR24057 KOG0658 2.7.1.- K00924 GO:0004672,GO:0005524,GO:0006468 AT5G26751.1 ATSK11,SK 11 shaggy-related kinase 11                                                                                         |
| 83  | Glyma10g28540 | <b>19798500:39380300</b> | 19581800 | YIELD | Q_COLYLDIR_10 | PF00642,PF06220 PTHR16465 GO:0003676,GO:0008270 AT5G26749.1 C2H2 and C2HC zinc fingers superfamily protein                                                                                                          |
| 84  | Glyma10g28560 | <b>19798500:39380300</b> | 19581800 | YIELD | Q_COLYLDIR_10 | PF01470 PTHR23402 KOG4755 GO:0006508 AT1G56700.1 Peptidase C15, pyroglutamyl peptidase I-like                                                                                                                       |
| 85  | Glyma10g28600 | <b>19798500:39380300</b> | 19581800 | YIELD | Q_COLYLDIR_10 | PTHR12847 KOG2355 K12608 AT5G02270.1 ATNAP9,NAP9 non-intrinsic ABC protein 9                                                                                                                                        |
| 86  | Glyma10g28610 | <b>19798500:39380300</b> | 19581800 | YIELD | Q_COLYLDIR_10 | PF01501 PTHR11183,PTHR11183:SF2 GO:0016757 AT2G47180.1 AtGolS1,GolS1 galactinol synthase 1                                                                                                                          |
| 87  | Glyma10g28620 | <b>19798500:39380300</b> | 19581800 | YIELD | Q_COLYLDIR_10 | PF05832 PTHR13019 KOG3195 GO:0016021 AT1G09330.1                                                                                                                                                                    |
| 88  | Glyma10g28640 | <b>19798500:39380300</b> | 19581800 | YIELD | Q_COLYLDIR_10 | PF04853 AT1G56560.1 Plant neutral invertase family protein                                                                                                                                                          |
| 89  | Glyma10g28650 | <b>19798500:39380300</b> | 19581800 | YIELD | Q_COLYLDIR_10 | PTHR10870 GO:0008853,GO:0006281,GO:0005634,GO:0003684 AT4G17760.1 damaged DNA binding;exodeoxyribonuclease IIIs                                                                                                     |
| 90  | Glyma10g28680 | <b>19798500:39380300</b> | 19581800 | YIELD | Q_COLYLDIR_10 | PF04398 AT1G09310.1 Protein of unknown function, DUF538                                                                                                                                                             |
| 91  | Glyma10g28690 | <b>19798500:39380300</b> | 19581800 | YIELD | Q_COLYLDIR_10 | PF00557,PF05195 PTHR10804,PTHR10804:SF8 KOG2414 3.4.11.9 K01262 GO:0009987,GO:0004177,GO:0030145 AT1G09300.1 Metallopeptidase M24 family protein                                                                    |
| 92  | Glyma10g28700 | <b>19798500:39380300</b> | 19581800 | YIELD | Q_COLYLDIR_10 | PF03959 PTHR18838,PTHR18838:SF15 KOG2551 GO:0016787 AT1G09280.1                                                                                                                                                     |
| 93  | Glyma10g28710 | <b>19798500:39380300</b> | 19581800 | YIELD | Q_COLYLDIR_10 |                                                                                                                                                                                                                     |
| 94  | Glyma10g28730 | <b>19798500:39380300</b> | 19581800 | YIELD | Q_COLYLDIR_10 | PF09597 AT5G26800.1                                                                                                                                                                                                 |
| 95  | Glyma10g28740 | <b>19798500:39380300</b> | 19581800 | YIELD | Q_COLYLDIR_10 | AT1G09250.1 basic helix-loop-helix (bHLH) DNA-binding superfamily protein                                                                                                                                           |
| 96  | Glyma10g28760 | <b>19798500:39380300</b> | 19581800 | YIELD | Q_COLYLDIR_10 | PF06963 PTHR11660:SF1,PTHR11660 KOG2601 GO:0005381,GO:0034755,GO:0016021 AT5G26820.1 ATIREG3,IREG3,MAR1,RTS3 iron-regulated protein 3                                                                               |
| 97  | Glyma10g28800 | <b>19798500:39380300</b> | 19581800 | YIELD | Q_COLYLDIR_10 | PF00515 PTHR22904:SF95,PTHR22904 GO:0005515 AT1G56440.1 Tetratricopeptide repeat (TPR)-like superfamily protein                                                                                                     |
| 98  | Glyma10g28810 | <b>19798500:39380300</b> | 19581800 | YIELD | Q_COLYLDIR_10 | PTHR12444 KOG1877 AT5G26850.1 Uncharacterized protein                                                                                                                                                               |
| 99  | Glyma10g28820 | <b>19798500:39380300</b> | 19581800 | YIELD | Q_COLYLDIR_10 | PF03790,PF00046,PF03789,PF03791 PTHR11850:SF45,PTHR11850 KOG0773 GO:0003700,GO:0043565,GO:0006355,GO:0003677,GO:0005634 AT1G23380.1 KNAT6,KNAT6L,KNAT6S KNOTTED1-like homeobox gene 6                               |
| 100 | Glyma10g28830 | <b>19798500:39380300</b> | 19581800 | YIELD | Q_COLYLDIR_10 | AT1G56423.1                                                                                                                                                                                                         |
| 101 | Glyma10g28840 | <b>19798500:39380300</b> | 19581800 | YIELD | Q_COLYLDIR_10 | PF00004,PF02190,PF05362 PTHR10046,PTHR10046:SF23 KOG2004 3.4.21.- K08675 GO:0005524,GO:0004176,GO:0006508,GO:0004252,GO:0009378,GO:0006281,GO:0006310,GO:0016887 AT5G26860.1 LON1,LON_ARA_ARA lon protease 1        |
| 102 | Glyma10g28850 | <b>19798500:39380300</b> | 19581800 | YIELD | Q_COLYLDIR_10 | AT2G24100.1                                                                                                                                                                                                         |
| 103 | Glyma10g28860 | <b>19798500:39380300</b> | 19581800 | YIELD | Q_COLYLDIR_10 | AT1G56420.1                                                                                                                                                                                                         |
| 104 | Glyma10g28880 | <b>19798500:39380300</b> | 19581800 | YIELD | Q_COLYLDIR_10 | PF03030 GO:0004427,GO:0009678,GO:0015992,GO:0016020 AT1G15690.1 ATAVP3,AtVHP1;1,AVP-3,AVP1 Inorganic H pyrophosphatase family protein                                                                               |
| 105 | Glyma10g28890 | <b>19798500:39380300</b> | 19581800 | YIELD | Q_COLYLDIR_10 | PF00262 PTHR11073 KOG0674 K08057 GO:0005509 AT1G09210.1 AtCRT1b,CRT1b calreticulin 1b                                                                                                                               |
| 106 | Glyma10g28900 | <b>19798500:39380300</b> | 19581800 | YIELD | Q_COLYLDIR_10 | PF00582 GO:0006950 AT3G62550.1 Adenine nucleotide alpha hydrolases-like superfamily protein                                                                                                                         |
| 107 | Glyma10g28910 | <b>19798500:39380300</b> | 19581800 | YIELD | Q_COLYLDIR_10 | PF00025 PTHR11711,PTHR11711:SF12 KOG0077 3.6.5.- K07953 GO:0005525,GO:0007264,GO:0004871,GO:0019001,GO:0007186,GO:0005622,GO:0006886 AT4G02080.1 ASAR1,ATSAR2,ATSARA1C,SAR2 secretion-associated RAS super family 2 |
| 108 | Glyma10g28930 | <b>19798500:39380300</b> | 19581800 | YIELD | Q_COLYLDIR_10 | PF01535 PTHR24015,PTHR24015:SF76 AT1G09190.1 Tetratricopeptide repeat (TPR)-like superfamily protein                                                                                                                |
| 109 | Glyma10g28950 | <b>19798500:39380300</b> | 19581800 | YIELD | Q_COLYLDIR_10 | PTHR21726,PTHR21726:SF12 AT5G26910.1                                                                                                                                                                                |
| 110 | Glyma10g28960 | <b>19798500:39380300</b> | 19581800 | YIELD | Q_COLYLDIR_10 | PF00270 PTHR13710:SF13,PTHR13710 KOG0331 GO:0003676,GO:0005524,GO:0008026,GO:0006310 AT3G05740.1 RECQ1 RECQ helicase I1                                                                                             |

|     |               |                          |          |       |               |                                                                                                                                                                                                              |
|-----|---------------|--------------------------|----------|-------|---------------|--------------------------------------------------------------------------------------------------------------------------------------------------------------------------------------------------------------|
| 111 | Glyma10g28970 | <b>19798500:39380300</b> | 19581800 | YIELD | Q_COLYLDIR_10 | PF12023 AT3G05725.1 Protein of unknown function (DUF3511)                                                                                                                                                    |
| 112 | Glyma10g28980 | <b>19798500:39380300</b> | 19581800 | YIELD | Q_COLYLDIR_10 | PF01612 PTHR13620 KOG2207 GO:0003676,GO:0008408,GO:0006139,GO:0005622 AT1G56310.1 Polynucleotidyl transferase, ribonuclease H-like superfamily protein                                                       |
| 113 | Glyma10g28990 | <b>19798500:39380300</b> | 19581800 | YIELD | Q_COLYLDIR_10 | PF07887 AT4G25800.1 Calmodulin-binding protein                                                                                                                                                               |
| 114 | Glyma10g29000 | <b>19798500:39380300</b> | 19581800 | YIELD | Q_COLYLDIR_10 | PF00514,PF01749 PTHR23316 KOG0166<br>GO:0005515,GO:0008565,GO:0006606,GO:0005634,GO:0005737,GO:0044183,GO:0006886,GO:0005643 AT3G06720.1 AIMP ALPHA,AT-IMP,ATKAP ALPHA,IMPA-1,IMPA1 importin alpha isoform 1 |
| 115 | Glyma10g29010 | <b>19798500:39380300</b> | 19581800 | YIELD | Q_COLYLDIR_10 | PF00929 PTHR13058,PTHR13058:SF10 KOG4793 AT5G26940.1 Polynucleotidyl transferase, ribonuclease H-like superfamily protein                                                                                    |
| 116 | Glyma10g29020 | <b>19798500:39380300</b> | 19581800 | YIELD | Q_COLYLDIR_10 | PF00804,PF05739 PTHR19957,PTHR19957:SF57 KOG0809 GO:0016020,GO:0005515 AT3G05710.2 AT5YP43,SYP43 syntaxin of plants 43                                                                                       |
| 117 | Glyma10g29030 | <b>19798500:39380300</b> | 19581800 | YIELD | Q_COLYLDIR_10 | PF05605 AT3G05700.1 Drought-responsive family protein                                                                                                                                                        |
| 118 | Glyma10g29040 | <b>19798500:39380300</b> | 19581800 | YIELD | Q_COLYLDIR_10 | PF00628 PTHR15242 KOG1493 GO:0005515 AT3G05670.1 RING/U-box protein                                                                                                                                          |
| 119 | Glyma10g29050 | <b>19798500:39380300</b> | 19581800 | YIELD | Q_COLYLDIR_10 | PF00225,PF00307 PTHR24115,PTHR24115:SF135 KOG0239<br>GO:0003777,GO:0005524,GO:0007018,GO:0005515 AT5G27000.1 ATK4,KATD kinesin 4                                                                             |
| 120 | Glyma10g29060 | <b>19798500:39380300</b> | 19581800 | YIELD | Q_COLYLDIR_10 | PF00481 PTHR13832:SF148,PTHR13832 KOG0698 GO:0003824 AT1G09160.1 Protein phosphatase 2C family protein                                                                                                       |
| 121 | Glyma10g29070 | <b>19798500:39380300</b> | 19581800 | YIELD | Q_COLYLDIR_10 | PF00436 PTHR10302 KOG1653 GO:0003697,GO:0006260 AT4G11060.1 MTSSB mitochondrially targeted single-stranded DNA binding protein                                                                               |
| 122 | Glyma10g29080 | <b>19798500:39380300</b> | 19581800 | YIELD | Q_COLYLDIR_10 | PF03371 PTHR23142 KOG2889 AT2G40650.1 PRP38 family protein                                                                                                                                                   |
| 123 | Glyma10g29090 | <b>19798500:39380300</b> | 19581800 | YIELD | Q_COLYLDIR_10 | PF00400 PTHR22847,PTHR22847:SF52 KOG0266 GO:0005515 AT5G27030.1 TPR3 TOPLESS-related 3                                                                                                                       |
| 124 | Glyma10g29100 | <b>19798500:39380300</b> | 19581800 | YIELD | Q_COLYLDIR_10 | PF00481 PTHR13832:SF94,PTHR13832 KOG0698 GO:0003824 AT5G27930.1 Protein phosphatase 2C family protein                                                                                                        |
| 125 | Glyma10g29110 | <b>19798500:39380300</b> | 19581800 | YIELD | Q_COLYLDIR_10 | PTHR18896,PTHR18896:SF2 AT3G05630.1 PDLZ2,PLDP2,PLDZETA2 phospholipase D P2                                                                                                                                  |
| 126 | Glyma10g29120 | <b>19798500:39380300</b> | 19581800 | YIELD | Q_COLYLDIR_10 | PTHR23083,PTHR23083:SF219 AT3G05625.1 Tetratricopeptide repeat (TPR)-like superfamily protein                                                                                                                |
| 127 | Glyma10g29130 | <b>19798500:39380300</b> | 19581800 | YIELD | Q_COLYLDIR_10 | PF00646 GO:0005515 AT1G09155.1 AtPP2-B15,PP2-B15 phloem protein 2-B15                                                                                                                                        |
| 128 | Glyma10g29140 | <b>19798500:39380300</b> | 19581800 | YIELD | Q_COLYLDIR_10 | PF07173 AT1G56230.1 Protein of unknown function (DUF1399)                                                                                                                                                    |
| 129 | Glyma10g29150 | <b>19798500:39380300</b> | 19581800 | YIELD | Q_COLYLDIR_10 | PF04043,PF01095 PTHR22931,PTHR22931:SF5 GO:0030599,GO:0042545,GO:0005618,GO:0004857 AT4G02330.1 ATPMEPCRB Plant invertase/pectin methylesterase inhibitor superfamily                                        |
| 130 | Glyma10g29160 | <b>19798500:39380300</b> | 19581800 | YIELD | Q_COLYLDIR_10 | PF01095,PF04043 PTHR22931,PTHR22931:SF5 GO:0030599,GO:0042545,GO:0005618,GO:0004857 AT3G05610.1 Plant invertase/pectin methylesterase inhibitor superfamily                                                  |
| 131 | Glyma10g29170 | <b>19798500:39380300</b> | 19581800 | YIELD | Q_COLYLDIR_10 | PF00828 PTHR10934 KOG1714 GO:0006412,GO:0005840,GO:0005622,GO:0003735 AT3G05590.1 RPL18 ribosomal protein L18                                                                                                |
| 132 | Glyma10g29180 | <b>19798500:39380300</b> | 19581800 | YIELD | Q_COLYLDIR_10 | PF03024 AT5G27830.1                                                                                                                                                                                          |
| 133 | Glyma10g29730 | <b>19798500:39380300</b> | 19581800 | YIELD | Q_COLYLDIR_10 | PF03834 PTHR12749 KOG2841 K10849 GO:0003684,GO:0004519,GO:0006281,GO:0005634 AT3G05210.1 ERCC1,UVR7 nucleotide repair protein, putative                                                                      |
| 134 | Glyma10g29750 | <b>19798500:39380300</b> | 19581800 | YIELD | Q_COLYLDIR_10 | PF00097 PTHR22764,PTHR22764:SF21 AT3G05200.1 AT16 RING/U-box superfamily protein                                                                                                                             |
| 135 | Glyma10g29760 | <b>19798500:39380300</b> | 19581800 | YIELD | Q_COLYLDIR_10 | PF00010 PTHR11534:SF7,PTHR11534 KOG4029 GO:0030528,GO:0006355 AT1G72210.1 basic helix-loop-helix (bHLH) DNA-binding superfamily protein                                                                      |
| 136 | Glyma10g29770 | <b>19798500:39380300</b> | 19581800 | YIELD | Q_COLYLDIR_10 | PF01063 PTHR11825,PTHR11825:SF13 KOG0975 GO:0003824,GO:0008152 AT5G27410.2 D-amino acid aminotransferase-like PLP-dependent enzymes superfamily protein                                                      |
| 137 | Glyma10g30220 | <b>19798500:39380300</b> | 19581800 | YIELD | Q_COLYLDIR_10 | PF01593 PTHR10742,PTHR10742:SF6 KOG0029 1.14.99.30 K00514 GO:0016491,GO:0055114 AT3G04870.1 PDE181,SPC1,ZDS zeta-carotene desaturase                                                                         |
| 138 | Glyma10g30230 | <b>19798500:39380300</b> | 19581800 | YIELD | Q_COLYLDIR_10 | PF10184 AT3G04890.1 Uncharacterized conserved protein (DUF2358)                                                                                                                                              |
| 139 | Glyma10g30240 | <b>19798500:39380300</b> | 19581800 | YIELD | Q_COLYLDIR_10 | PF05910 AT5G11000.1 Plant protein of unknown function (DUF868)                                                                                                                                               |
| 140 | Glyma10g30250 | <b>19798500:39380300</b> | 19581800 | YIELD | Q_COLYLDIR_10 | PF00036 AT1G54530.1 Calcium-binding EF hand family protein                                                                                                                                                   |
| 141 | Glyma10g30260 | <b>19798500:39380300</b> | 19581800 | YIELD | Q_COLYLDIR_10 | PF05910 AT5G28150.1 Plant protein of unknown function (DUF868)                                                                                                                                               |



|     |               |                          |          |             |                 |                                                                                                                                                                                      |
|-----|---------------|--------------------------|----------|-------------|-----------------|--------------------------------------------------------------------------------------------------------------------------------------------------------------------------------------|
| 142 | Glyma10g30270 | <b>19798500:39380300</b> | 19581800 | YIELD       | Q_COLYLDIR_10   | PF03096 PTHR11034,PTHR11034:SF3 KOG2931 AT5G56750.1 NDL1 N-MYC downregulated-like 1                                                                                                  |
| 143 | Glyma10g38170 | <b>44778100:59592500</b> | 14814400 | YIELD       | Q_CLAYLDRF_10-1 |                                                                                                                                                                                      |
| 144 | Glyma10g38190 | <b>44778100:59592500</b> | 14814400 | YIELD       | Q_CLAYLDRF_10-1 | PF04979 PTHR12398:SF5,PTHR12398 GO:0004864,GO:0009966,GO:0043666 AT5G52200.1 phosphoprotein phosphatase inhibitors                                                                   |
| 145 | Glyma10g38200 | <b>44778100:59592500</b> | 14814400 | YIELD       | Q_CLAYLDRF_10-1 | AT5G52190.1 Sugar isomerase (SIS) family protein                                                                                                                                     |
| 146 | Glyma10g38220 | <b>44778100:59592500</b> | 14814400 | YIELD       | Q_CLAYLDRF_10-1 |                                                                                                                                                                                      |
| 147 | Glyma10g38230 | <b>44778100:59592500</b> | 14814400 | YIELD       | Q_CLAYLDRF_10-1 | PF10268 AT5G52180.1                                                                                                                                                                  |
| 148 | Glyma10g38240 | <b>44778100:59592500</b> | 14814400 | YIELD       | Q_CLAYLDRF_10-1 | PF00447 PTHR10015,PTHR10015:SF7 GO:0003700,GO:0043565,GO:0006355,GO:0005634 AT5G62020.1 AT-HSFB2A,HSFB2A heat shock transcription factor B2A                                         |
| 149 | Glyma10g38270 | <b>44778100:59592500</b> | 14814400 | YIELD       | Q_CLAYLDRF_10-1 | PF00023 PTHR24136,PTHR24136:SF158 KOG0502 GO:0005515 AT5G07270.1 XBAT33 XB3 ortholog 3 in Arabidopsis thaliana                                                                       |
| 150 | Glyma12g16940 | <b>16548000:17927000</b> | 1379000  | OTHER-SEED  | Daidzein 2-2    | PF01397,PF03936 GO:0010333,GO:0016829,GO:0008152,GO:0000287 AT2G24210.1 TPS10 terpene synthase 10                                                                                    |
| 151 | Glyma12g17240 | <b>16548000:17927000</b> | 1379000  | OTHER-SEED  | Daidzein 2-2    | PF02542 GO:0008685,GO:0016114 AT1G63970.1 ISPF,MECPS isoprenoid F                                                                                                                    |
| 152 | Glyma12g17510 | <b>16548000:17927000</b> | 1379000  | OTHER-SEED  | Daidzein 2-2    | PF03321 K14487 AT5G54510.1 DFL1,GH3.6 Auxin-responsive GH3 family protein                                                                                                            |
| 153 | Glyma12g17550 | <b>16548000:17927000</b> | 1379000  | OTHER-SEED  | Daidzein 2-2    | PF05207,PF00226 GO:0031072 AT4G10130.1 DNAJ heat shock N-terminal domain-containing protein                                                                                          |
| 154 | Glyma12g17560 | <b>16548000:17927000</b> | 1379000  | OTHER-SEED  | Daidzein 2-2    | PF05093 PTHR13273,PTHR13273:SF5 KOG4020 AT5G18400.2 Cytokine-induced anti-apoptosis inhibitor 1, Fe-S biogenesis                                                                     |
| 155 | Glyma12g17580 | <b>16548000:17927000</b> | 1379000  | OTHER-SEED  | Daidzein 2-2    |                                                                                                                                                                                      |
| 156 | Glyma12g17630 | <b>16548000:17927000</b> | 1379000  | OTHER-SEED  | Daidzein 2-2    | AT3G20640.1 basic helix-loop-helix (bHLH) DNA-binding superfamily protein                                                                                                            |
| 157 | Glyma12g17660 | <b>16548000:17927000</b> | 1379000  | OTHER-SEED  | Daidzein 2-2    | PF00810 PTHR10585,PTHR10585:SF10 GO:0046923,GO:0006621,GO:0016021 AT1G19970.1 ER lumen protein retaining receptor family protein                                                     |
| 158 | Glyma12g17680 | <b>16548000:17927000</b> | 1379000  | OTHER-SEED  | Daidzein 2-2    | PF03358 KOG3135 GO:0010181,GO:0016491,GO:0009055,GO:0050662 AT5G54500.1 FQR1 flavodoxin-like quinone reductase 1                                                                     |
| 159 | Glyma13g00200 | <b>0:2239890</b>         | 2239890  | WHOLE-PLANT | Node num 1-5    | PF00320 PTHR10071 GO:0003700,GO:0008270,GO:0043565,GO:0006355 AT5G56860.1 GATA21,GNC GATA type zinc finger transcription factor family protein                                       |
| 160 | Glyma13g00230 | <b>0:2239890</b>         | 2239890  | WHOLE-PLANT | Node num 1-5    | PF01399 PTHR12732 KOG2688 GO:0005515 AT2G19560.1 EER5 proteasome family protein                                                                                                      |
| 161 | Glyma13g00240 | <b>0:2239890</b>         | 2239890  | WHOLE-PLANT | Node num 1-5    |                                                                                                                                                                                      |
| 162 | Glyma13g00280 | <b>0:2239890</b>         | 2239890  | WHOLE-PLANT | Node num 1-5    | PF00722,PF06955 PTHR10963,PTHR10963:SF14 2.4.1.207 K08235 GO:0004553,GO:0005975,GO:0016762,GO:0006073,GO:0005618,GO:0048046 AT4G25810.1 XTH23,XTR6 xyloglucan endotransglycosylase 6 |
| 163 | Glyma13g00300 | <b>0:2239890</b>         | 2239890  | WHOLE-PLANT | Node num 1-5    | PF03005 PTHR13533,PTHR13533:SF3 AT5G20590.1 TBL5 TRICHOME BIREFRINGENCE-LIKE 5                                                                                                       |
| 164 | Glyma13g00310 | <b>0:2239890</b>         | 2239890  | WHOLE-PLANT | Node num 1-5    | PF02183,PF00046 PTHR24326,PTHR24326:SF218 GO:0003700,GO:0043565,GO:0006355,GO:0003677,GO:0005634 AT5G06710.1 HAT14 homeobox from Arabidopsis thaliana                                |
| 165 | Glyma13g00320 | <b>0:2239890</b>         | 2239890  | WHOLE-PLANT | Node num 1-5    |                                                                                                                                                                                      |
| 166 | Glyma13g00350 | <b>0:2239890</b>         | 2239890  | WHOLE-PLANT | Node num 1-5    | PF05915 PTHR15664 KOG4753 AT4G29850.1 Eukaryotic protein of unknown function (DUF872)                                                                                                |
| 167 | Glyma13g00360 | <b>0:2239890</b>         | 2239890  | WHOLE-PLANT | Node num 1-5    | PF09753 AT3G55600.1 Membrane fusion protein Use1                                                                                                                                     |
| 168 | Glyma13g00370 | <b>0:2239890</b>         | 2239890  | WHOLE-PLANT | Node num 1-5    | PF00069 PTHR24420:SF531,PTHR24420 KOG1187 GO:0004672,GO:0005524,GO:0006468 AT2G17220.1 Protein kinase superfamily protein                                                            |
| 169 | Glyma13g00380 | <b>0:2239890</b>         | 2239890  | WHOLE-PLANT | Node num 1-5    | PF10533,PF03106 GO:0003700,GO:0043565,GO:0006355 AT4G31550.1 ATWRKY11,WRKY11 WRKY DNA-binding protein 11                                                                             |
| 170 | Glyma13g00390 | <b>0:2239890</b>         | 2239890  | WHOLE-PLANT | Node num 1-5    | PF03547 K13947 GO:0055085,GO:0016021 AT5G57090.1 AGR,AGR1,ATPIN2,EIR1,PIN2,WAV6 Auxin efflux carrier family protein                                                                  |
| 171 | Glyma13g00430 | <b>0:2239890</b>         | 2239890  | WHOLE-PLANT | Node num 1-5    | PF05022 PTHR23216 AT5G57120.1                                                                                                                                                        |
| 172 | Glyma13g00440 | <b>0:2239890</b>         | 2239890  | WHOLE-PLANT | Node num 1-5    | AT5G57123.1                                                                                                                                                                          |

|     |               |                         |         |             |               |                                                                                                                                                                                              |
|-----|---------------|-------------------------|---------|-------------|---------------|----------------------------------------------------------------------------------------------------------------------------------------------------------------------------------------------|
| 173 | Glyma13g00450 | <b>0:2239890</b>        | 2239890 | WHOLE-PLANT | Node num 1-5  | PF12146 PTHR11614,PTHR11614:SF20 KOG1455 AT1G52760.1 LysoPL2 lysophospholipase 2                                                                                                             |
| 174 | Glyma13g00460 | <b>0:2239890</b>        | 2239890 | WHOLE-PLANT | Node num 1-5  | PF02861 PTHR11638:SF2,PTHR11638 KOG1051 GO:0019538 AT4G29920.1 Double Clp-N motif-containing P-loop nucleoside triphosphate hydrolases superfamily                                           |
| 175 | Glyma13g00470 | <b>0:2239890</b>        | 2239890 | WHOLE-PLANT | Node num 1-5  | PF01532 PTHR11742:SF6,PTHR11742 KOG2204 GO:0004571,GO:0005509,GO:0016020 AT1G51590.1 MANIB,MNS1 alpha-mannosidase 1                                                                          |
| 176 | Glyma13g00480 | <b>0:2239890</b>        | 2239890 | WHOLE-PLANT | Node num 1-5  | PF00010 PTHR11514:SF7,PTHR11514 GO:0030528,GO:0006355 AT5G57150.2 basic helix-loop-helix (bHLH) DNA-binding superfamily protein                                                              |
| 177 | Glyma13g00490 | <b>0:2239890</b>        | 2239890 | WHOLE-PLANT | Node num 1-5  | PF10253 PTHR13621:SF3,PTHR13621 KOG3903 AT2G19270.1                                                                                                                                          |
| 178 | Glyma13g00500 | <b>0:2239890</b>        | 2239890 | WHOLE-PLANT | Node num 1-5  | PF01187 PTHR11954:SF3,PTHR11954 KOG1759 AT5G57170.1 Tautomerase/MIF superfamily protein                                                                                                      |
| 179 | Glyma13g00510 | <b>0:2239890</b>        | 2239890 | WHOLE-PLANT | Node num 1-5  | PF00013 PTHR10288,PTHR10288:SF53 KOG2190 GO:0003723 AT4G26000.1 PEP RNA-binding KH domain-containing protein                                                                                 |
| 180 | Glyma13g00520 | <b>0:2239890</b>        | 2239890 | WHOLE-PLANT | Node num 1-5  | PF06203 GO:0005515 AT5G57180.2 CIA2 chloroplast import apparatus 2                                                                                                                           |
| 181 | Glyma13g00530 | <b>0:2239890</b>        | 2239890 | WHOLE-PLANT | Node num 1-5  | PF00383 PTHR11079 KOG1018 GO:0008270,GO:0016787 AT1G48175.1 emb2191 Cytidine/deoxycytidylate deaminase family protein                                                                        |
| 182 | Glyma13g00540 | <b>0:2239890</b>        | 2239890 | WHOLE-PLANT | Node num 1-5  | PF00628,PF00046 PTHR12628:SF11,PTHR12628 GO:0003700,GO:0043565,GO:0006355,GO:0005515 AT4G29940.1 PRHA pathogenesis related homeodomain protein A                                             |
| 183 | Glyma13g00550 | <b>0:2239890</b>        | 2239890 | WHOLE-PLANT | Node num 1-5  | PF07651 PTHR22951,PTHR22951:SF1 KOG0251 GO:0005543 AT4G25940.1 ENTH/ANTH/VHS superfamily protein                                                                                             |
| 184 | Glyma13g00560 | <b>0:2239890</b>        | 2239890 | WHOLE-PLANT | Node num 1-5  | AT1G78890.1                                                                                                                                                                                  |
| 185 | Glyma13g00570 | <b>0:2239890</b>        | 2239890 | WHOLE-PLANT | Node num 1-5  | PF00566 PTHR22957:SF24,PTHR22957 KOG1091 GO:0005097,GO:0032313,GO:0005622 AT4G29950.1 Ypt/Rab-GAP domain of gyp1p superfamily protein                                                        |
| 186 | Glyma13g00580 | <b>0:2239890</b>        | 2239890 | WHOLE-PLANT | Node num 1-5  | PF05922,PF00082,PF06280,PF02225 PTHR10795,PTHR10795:SF17 KOG1153 GO:0004252,GO:0006508,GO:0042802,GO:0043086,GO:0005618,GO:0016020 AT4G30020.1 PA-domain containing subtilase family protein |
| 187 | Glyma13g00590 | <b>0:2239890</b>        | 2239890 | WHOLE-PLANT | Node num 1-5  | PF01237 PTHR10972:SF27,PTHR10972 KOG2210 AT4G25850.1 ORP4B OSBP(oxysterol binding protein)-related protein 4B                                                                                |
| 188 | Glyma13g00595 | <b>0:2239890</b>        | 2239890 | WHOLE-PLANT | Node num 1-5  | PF01237 PTHR10972 KOG2210 AT4G25850.2 ORP4B OSBP(oxysterol binding protein)-related protein 4B                                                                                               |
| 189 | Glyma13g00600 | <b>0:2239890</b>        | 2239890 | WHOLE-PLANT | Node num 1-5  | AT5G66580.1                                                                                                                                                                                  |
| 190 | Glyma13g00610 | <b>0:2239890</b>        | 2239890 | WHOLE-PLANT | Node num 1-5  | PF02485 GO:0008375,GO:0016020 AT2G19160.1 Core-2/l-branching beta-1,6-N-acetylglucosaminyltransferase family protein                                                                         |
| 191 | Glyma13g00630 | <b>0:2239890</b>        | 2239890 | WHOLE-PLANT | Node num 1-5  | PF00702,PF00122 PTHR24093,PTHR24093:SF31 KOG0207 3.6.3.3,3.6.3.5 K01534 GO:0000166,GO:0046872,GO:0003824,GO:0008152 AT4G30110.1 ATHMA2,HMA2 heavy metal atpase 2                             |
| 192 | Glyma13g00640 | <b>0:2239890</b>        | 2239890 | WHOLE-PLANT | Node num 1-5  | PTHR11132 AT3G11320.1 Nucleotide-sugar transporter family protein                                                                                                                            |
| 193 | Glyma13g08460 | <b>8668000:10441000</b> | 1773000 | OTHER-SEED  | Glycitein 2-3 | PF06017 GO:0003774,GO:0016459 AT5G53310.1 myosin heavy chain-related                                                                                                                         |
| 194 | Glyma14g03490 | <b>1544480:2474320</b>  | 929840  | YIELD       | Flr num 1-6   | PF02458 GO:0016747 AT1G32910.1 HXXXD-type acyl-transferase family protein                                                                                                                    |
| 195 | Glyma14g03500 | <b>1544480:2474320</b>  | 929840  | YIELD       | Flr num 1-6   | PF00494 KOG1459 GO:0016740,GO:0009058 AT5G17230.1 PSY PHYTOENE SYNTHASE                                                                                                                      |
| 196 | Glyma14g03510 | <b>1544480:2474320</b>  | 929840  | YIELD       | Flr num 1-6   | PF11900,PF00651,PF12313 KOG0512 GO:0005515 AT5G45110.1 ATNPR3,NPR3 NPR1-like protein 3                                                                                                       |
| 197 | Glyma14g03520 | <b>1544480:2474320</b>  | 929840  | YIELD       | Flr num 1-6   | PF03798 PTHR13439 KOG4561 GO:0016021 AT4G19645.1 TRAM, LAG1 and CLN8 (TLC) lipid-sensing domain containing                                                                                   |
| 198 | Glyma14g03550 | <b>1544480:2474320</b>  | 929840  | YIELD       | Flr num 1-6   | PF00400 PTHR22838 KOG0293 GO:0005515 AT5G08560.1 transducin family protein / WD-40 repeat family protein                                                                                     |
| 199 | Glyma14g03560 | <b>1544480:2474320</b>  | 929840  | YIELD       | Flr num 1-6   | PF01789 GO:0005509,GO:0015979,GO:0009523,GO:0009654,GO:0019898 AT1G06680.1 OE23,OEE2,PSBP-1,PSII-P photosystem II subunit P-1                                                                |
| 200 | Glyma14g03570 | <b>1544480:2474320</b>  | 929840  | YIELD       | Flr num 1-6   | PF02453 PTHR10994:SF27,PTHR10994 KOG1792 GO:0005783 AT3G10260.3 Reticulon family protein                                                                                                     |
| 201 | Glyma14g03580 | <b>1544480:2474320</b>  | 929840  | YIELD       | Flr num 1-6   |                                                                                                                                                                                              |
| 202 | Glyma14g03590 | <b>1544480:2474320</b>  | 929840  | YIELD       | Flr num 1-6   | PF09753 KOG2678 AT3G55600.1 Membrane fusion protein Use1                                                                                                                                     |

|     |               |                          |          |           |                |                                                                                                                                                                                          |
|-----|---------------|--------------------------|----------|-----------|----------------|------------------------------------------------------------------------------------------------------------------------------------------------------------------------------------------|
| 203 | Glyma14g03600 | <b>1544480:2474320</b>   | 929840   | YIELD     | Flr num 1-6    | PF00010 PTHR12565,PTHR12565:SF7 GO:0030528,GO:0006355 AT2G43010.2 PIF4,SRL2 phytochrome interacting factor 4                                                                             |
| 204 | Glyma14g03610 | <b>1544480:2474320</b>   | 929840   | YIELD     | Flr num 1-6    | PF01593 PTHR10742:SF30,PTHR10742 KOG0029<br>GO:0009055,GO:0016491,GO:0055114,GO:0050660,GO:0008033 AT2G43020.1 ATPAO2,PAO2 polyamine oxidase 2                                           |
| 205 | Glyma14g03620 | <b>1544480:2474320</b>   | 929840   | YIELD     | Flr num 1-6    | PF01554 PTHR11206:SF47,PTHR11206 KOG1347<br>GO:0015238,GO:0015297,GO:0006855,GO:0055085,GO:0016020 AT3G59030.1 ATTT12,TT12 MATE efflux family protein                                    |
| 206 | Glyma14g03630 | <b>1544480:2474320</b>   | 929840   | YIELD     | Flr num 1-6    | KOG0978 AT2G34780.1 EMB1611,MEE22 maternal effect embryo arrest 22                                                                                                                       |
| 207 | Glyma14g03640 | <b>1544480:2474320</b>   | 929840   | YIELD     | Flr num 1-6    | PF01535 PTHR24015 AT5G64320.1 Pentatricopeptide repeat (PPR) superfamily protein                                                                                                         |
| 208 | Glyma14g03650 | <b>1544480:2474320</b>   | 929840   | YIELD     | Flr num 1-6    | PF02309,PF06507,PF02362 GO:0006355,GO:0005634,GO:0003677,GO:0009725 AT1G30330.2 ARF6 auxin response factor 6                                                                             |
| 209 | Glyma14g03660 | <b>1544480:2474320</b>   | 929840   | YIELD     | Flr num 1-6    | PF00234 AT4G33355.1 Bifunctional inhibitor/lipid-transfer protein/seed storage 2S albumin superfamily protein                                                                            |
| 210 | Glyma14g03710 | <b>1544480:2474320</b>   | 929840   | YIELD     | Flr num 1-6    | PF00295 GO:0004650,GO:0005975 AT4G23820.1 Pectin lyase-like superfamily protein                                                                                                          |
| 211 | Glyma14g03730 | <b>1544480:2474320</b>   | 929840   | YIELD     | Flr num 1-6    | AT4G33355.1 Bifunctional inhibitor/lipid-transfer protein/seed storage 2S albumin superfamily protein                                                                                    |
| 212 | Glyma14g03740 | <b>1544480:2474320</b>   | 929840   | YIELD     | Flr num 1-6    | PTHR24015:SF11,PTHR24015 AT3G59300.1 Pentatricopeptide repeat (PPR) superfamily protein                                                                                                  |
| 213 | Glyma14g13480 | <b>10874400:14120960</b> | 3246560  | LEAF-STEM | Lf lgth 10-4   | PF00155 PTHR11879 GO:0016740,GO:0030170,GO:0009058,GO:0016769,GO:0008483,GO:0006520 AT4G31990.3 AAT3,ASP5,ATAAT1 aspartate aminotransferase 5                                            |
| 214 | Glyma14g13490 | <b>10874400:14120960</b> | 3246560  | LEAF-STEM | Lf lgth 10-4   | PF00069 PTHR24420:SF449,PTHR24420 KOG1187 GO:0004672,GO:0005524,GO:0006468 AT2G25220.1 Protein kinase superfamily protein                                                                |
| 215 | Glyma14g13520 | <b>10874400:14120960</b> | 3246560  | LEAF-STEM | Lf lgth 10-4   | PF08626 PTHR21512,PTHR21512:SF5 AT5G11040.1 AtTRS120,TRS120 TRS120                                                                                                                       |
| 216 | Glyma14g13780 | <b>10874400:14120960</b> | 3246560  | LEAF-STEM | Lf lgth 10-4   | AT5G25265.1                                                                                                                                                                              |
| 217 | Glyma14g14140 | <b>10874400:14120960</b> | 3246560  | LEAF-STEM | Lf lgth 10-4   |                                                                                                                                                                                          |
| 218 | Glyma14g14210 | <b>10874400:14120960</b> | 3246560  | LEAF-STEM | Lf lgth 10-4   |                                                                                                                                                                                          |
| 219 | Glyma14g17640 | <b>14223400:21906400</b> | 7683000  | LEAF-STEM | Lf lgth 10-3   | AT5G39380.1 Plant calmodulin-binding protein-related                                                                                                                                     |
| 220 | Glyma14g17650 | <b>14223400:21906400</b> | 7683000  | LEAF-STEM | Lf lgth 10-3   | PF01535,PF00571 PTHR24015 GO:0005515 AT5G10690.1 pentatricopeptide (PPR) repeat-containing protein / CBS domain-containing protein                                                       |
| 221 | Glyma14g17660 | <b>14223400:21906400</b> | 7683000  | LEAF-STEM | Lf lgth 10-3   | AT5G10695.1                                                                                                                                                                              |
| 222 | Glyma15g14260 | <b>6107000:22655000</b>  | 16548000 | LEAF-STEM | Lflt shape 8-8 | AT1G19980.1 cytomatrix protein-related                                                                                                                                                   |
| 223 | Glyma15g14280 | <b>6107000:22655000</b>  | 16548000 | LEAF-STEM | Lflt shape 8-8 | PF00542 PTHR11809,PTHR11809:SF6 KOG1715 GO:0003735,GO:0006412,GO:0005622,GO:0005840 AT3G06040.1 Ribosomal protein L12/ ATP-dependent Clp protease adaptor protein                        |
| 224 | Glyma15g14290 | <b>6107000:22655000</b>  | 16548000 | LEAF-STEM | Lflt shape 8-8 | PF03092 PTHR24003,PTHR24003:SF252 KOG2615 AT1G64890.1 Major facilitator superfamily protein                                                                                              |
| 225 | Glyma15g14320 | <b>6107000:22655000</b>  | 16548000 | LEAF-STEM | Lflt shape 8-8 | PF00538,PF00249 PTHR21717 GO:0003677,GO:0006334,GO:0000786,GO:0005634 AT1G49950.1 ATTRB1,TRB1 telomere repeat binding factor 1                                                           |
| 226 | Glyma15g14330 | <b>6107000:22655000</b>  | 16548000 | LEAF-STEM | Lflt shape 8-8 | PF00067 PTHR24286:SF24,PTHR24286 KOG0157 1.14.13.79 K04123<br>GO:0005506,GO:0009055,GO:0016705,GO:0020037,GO:0055114 AT2G32440.1<br>ATKAO2,CYP88A4,KAO2 ent-kaurenoic acid hydroxylase 2 |
| 227 | Glyma15g14340 | <b>6107000:22655000</b>  | 16548000 | LEAF-STEM | Lflt shape 8-8 | PF11955 AT2G39120.1 Ubiquitin carboxyl-terminal hydrolase family protein                                                                                                                 |
| 228 | Glyma15g14350 | <b>6107000:22655000</b>  | 16548000 | LEAF-STEM | Lflt shape 8-8 | PF00191 PTHR10502:SF10,PTHR10502 KOG0819 GO:0005509,GO:0005544 AT5G12380.1 ANNAT8 annexin 8                                                                                              |
| 229 | Glyma15g14360 | <b>6107000:22655000</b>  | 16548000 | LEAF-STEM | Lflt shape 8-8 | PF00106 PTHR24322:SF18,PTHR24322 KOG1611 GO:0016491,GO:0008152 AT4G20760.1 NAD(P)-binding Rossmann-fold superfamily protein                                                              |
| 230 | Glyma15g14371 | <b>6107000:22655000</b>  | 16548000 | LEAF-STEM | Lflt shape 8-8 | PF03106 GO:0003700,GO:0043565,GO:0006355 AT1G30650.1 AR411,ATWRKY14,WRKY14 WRKY DNA-binding protein 14                                                                                   |
| 231 | Glyma15g14380 | <b>6107000:22655000</b>  | 16548000 | LEAF-STEM | Lflt shape 8-8 | PF00501 PTHR24095,PTHR24095:SF26 GO:0003824,GO:0008152 AT3G16910.1 AAE7,ACN1 acyl-activating enzyme 7                                                                                    |

|     |               |                          |          |               |                |                                                                                                                                                                                                                                                                                                                                                 |
|-----|---------------|--------------------------|----------|---------------|----------------|-------------------------------------------------------------------------------------------------------------------------------------------------------------------------------------------------------------------------------------------------------------------------------------------------------------------------------------------------|
| 232 | Glyma15g14390 | <b>6107000:22655000</b>  | 16548000 | LEAF-STEM     | Lflt shape 8-8 | PF00069 PTHR24056:SF109,PTHR24056 KOG0594 2.7.11.22 K02087<br>GO:0004672,GO:0005524,GO:0006468 AT3G48750.1 CDC2,CDC2A,CDC2AAT,CDK2,CDKA1,CDKA;1 cell division control 2                                                                                                                                                                         |
| 233 | Glyma15g14420 | <b>6107000:22655000</b>  | 16548000 | LEAF-STEM     | Lflt shape 8-8 | AT1G53645.1 hydroxyproline-rich glycoprotein family protein<br>PF01370 PTHR10366,PTHR10366:SF39 KOG1371 5.1.3.5 K12448                                                                                                                                                                                                                          |
| 234 | Glyma15g14433 | <b>6107000:22655000</b>  | 16548000 | LEAF-STEM     | Lflt shape 8-8 | GO:0016491,GO:0008152,GO:0003854,GO:0016616,GO:0006694,GO:0055114,GO:0003824,GO:0050662,GO:0044237,GO:0009058,GO:0008831,GO:0045226,GO:0006012,GO:0003978 AT1G30620.1 HSR8,MUR4,UXE1 NAD(P)-binding Rossmann-fold superfamily protein<br>PF03171 PTHR10209 GO:0016491,GO:0016706,GO:0055114 AT1G47990.1 ATGA2OX4,GA2OX4 gibberellin 2-oxidase 4 |
| 235 | Glyma15g14633 | <b>6107000:22655000</b>  | 16548000 | LEAF-STEM     | Lflt shape 8-8 | AT2G43630.1                                                                                                                                                                                                                                                                                                                                     |
| 236 | Glyma15g14660 | <b>6107000:22655000</b>  | 16548000 | LEAF-STEM     | Lflt shape 8-8 | AT5G49610.1 F-box family protein                                                                                                                                                                                                                                                                                                                |
| 237 | Glyma15g14690 | <b>6107000:22655000</b>  | 16548000 | LEAF-STEM     | Lflt shape 8-8 | PF00226 PTHR24078 KOG0720 GO:0031072 AT5G49580.1 Chaperone DnaJ-domain superfamily protein                                                                                                                                                                                                                                                      |
| 238 | Glyma15g14700 | <b>6107000:22655000</b>  | 16548000 | LEAF-STEM     | Lflt shape 8-8 | PF01250 KOG4708 GO:0003735,GO:0019843,GO:0006412,GO:0005840 AT3G17170.1 RFC3 Translation elongation factor EF1B/ribosomal protein S6 family protein                                                                                                                                                                                             |
| 239 | Glyma15g14710 | <b>6107000:22655000</b>  | 16548000 | LEAF-STEM     | Lflt shape 8-8 | AT1G47980.1                                                                                                                                                                                                                                                                                                                                     |
| 240 | Glyma15g14720 | <b>6107000:22655000</b>  | 16548000 | LEAF-STEM     | Lflt shape 8-8 | PF01655 PTHR23413 GO:0003735,GO:0006412,GO:0005622,GO:0005840 AT4G18100.1 Ribosomal protein L32e                                                                                                                                                                                                                                                |
| 241 | Glyma15g23270 | <b>6107000:22655000</b>  | 16548000 | LEAF-STEM     | Lflt shape 8-8 | PF04185 GO:0016788 AT3G03530.1 NPC4 non-specific phospholipase C4                                                                                                                                                                                                                                                                               |
| 242 | Glyma16g08990 | <b>8471000:12411000</b>  | 3940000  | REPROD-PERIOD | Fflr 9-3       | PF00044,PF02800 PTHR10836 KOG0657 1.2.1.12 K00134 GO:0016620,GO:0055114 AT1G16300.1 GAPCP-2 glyceraldehyde-3-phosphate dehydrogenase of plastid 2                                                                                                                                                                                               |
| 243 | Glyma16g09020 | <b>8471000:12411000</b>  | 3940000  | REPROD-PERIOD | Fflr 9-3       | PTHR11132 AT1G07290.1 GONST2 golgi nucleotide sugar transporter 2                                                                                                                                                                                                                                                                               |
| 244 | Glyma18g07345 | <b>8471000:12411000</b>  | 3940000  | REPROD-PERIOD | Fflr 9-3       | PF00271,PF00270 PTHR24031,PTHR24031:SF161 KOG0331<br>GO:0003676,GO:0005524,GO:0008026,GO:0004386 AT3G22330.1 ATRH53,PMH2 putative mitochondrial RNA helicase 2                                                                                                                                                                                  |
| 245 | Glyma18g14670 | <b>13545720:19024290</b> | 5478570  | REPROD-PERIOD | Reprod 5-2     | PF00069,PF00560,PF08263 PTHR24420:SF516,PTHR24420 KOG1187<br>GO:0004672,GO:0005524,GO:0006468,GO:0005515 AT4G20270.1 BAM3 Leucine-rich receptor-like protein kinase family protein                                                                                                                                                              |
| 246 | Glyma18g14680 | <b>13545720:19024290</b> | 5478570  | REPROD-PERIOD | Reprod 5-2     |                                                                                                                                                                                                                                                                                                                                                 |
| 247 | Glyma18g14730 | <b>13545720:19024290</b> | 5478570  | REPROD-PERIOD | Reprod 5-2     |                                                                                                                                                                                                                                                                                                                                                 |
| 248 | Glyma18g14740 | <b>13545720:19024290</b> | 5478570  | REPROD-PERIOD | Reprod 5-2     | PF00266 PTHR21152,PTHR21152:SF7 KOG2862 2.6.1.44,2.6.1.45,2.6.1.51 K00830 GO:0008152 AT2G13360.1 AGT,AGT1,SGAT alanine:glyoxylate aminotransferase                                                                                                                                                                                              |
| 249 | Glyma18g14750 | <b>13545720:19024290</b> | 5478570  | REPROD-PERIOD | Reprod 5-2     | PF00170 PTHR13301,PTHR13301:SF21 GO:0003700,GO:0043565,GO:0046983,GO:0006355 AT5G11260.1 HY5,TED 5 Basic-leucine zipper (bZIP) transcription factor family protein                                                                                                                                                                              |
| 250 | Glyma18g14760 | <b>13545720:19024290</b> | 5478570  | REPROD-PERIOD | Reprod 5-2     |                                                                                                                                                                                                                                                                                                                                                 |
| 251 | Glyma18g14770 | <b>13545720:19024290</b> | 5478570  | REPROD-PERIOD | Reprod 5-2     | PF02854,PF02847 PTHR18034,PTHR18034:SF3 KOG2140 K13100 GO:0005515,GO:0016070 AT1G80930.1 MIF4G domain-containing protein / MA3 domain-containing protein                                                                                                                                                                                        |
| 252 | Glyma18g14790 | <b>13545720:19024290</b> | 5478570  | REPROD-PERIOD | Reprod 5-2     |                                                                                                                                                                                                                                                                                                                                                 |
| 253 | Glyma18g14810 | <b>13545720:19024290</b> | 5478570  | REPROD-PERIOD | Reprod 5-2     | PF01582,PF07725,PF00931 PTHR11017,PTHR11017:SF20 KOG4658<br>GO:0043531,GO:0005515,GO:0007165,GO:0005622,GO:0045087,GO:0031224,GO:0004888,GO:0006915,GO:0005524 AT5G17680.1 disease resistance protein (TIR-NBS-LRR class), putative                                                                                                             |
| 254 | Glyma19g04890 | <b>0:21124310</b>        | 21124310 | YIELD         | Pod num 1-9    | PF00657 PTHR22835:SF39,PTHR22835 GO:0016788,GO:0006629 AT5G15720.1 GLIP7 GDSL-motif lipase 7                                                                                                                                                                                                                                                    |
| 255 | Glyma19g04900 | <b>0:21124310</b>        | 21124310 | YIELD         | Pod num 1-9    | PF00326 PTHR12277,PTHR12277:SF8 KOG1552 GO:0008236,GO:0006508 AT3G30380.2 alpha/beta-Hydrolases superfamily protein                                                                                                                                                                                                                             |
| 256 | Glyma19g04910 | <b>0:21124310</b>        | 21124310 | YIELD         | Pod num 1-9    | PF06391 PTHR12683,PTHR12683:SF3 K10842 GO:0007049,GO:0005634 AT4G30820.1 cyclin-dependent kinase-activating kinase assembly factor-related / CDK-activating kinase                                                                                                                                                                              |
| 257 | Glyma19g04920 | <b>0:21124310</b>        | 21124310 | YIELD         | Pod num 1-9    | PF10046 PTHR10668:SF1,PTHR10668 KOG4559 AT5G49550.1                                                                                                                                                                                                                                                                                             |
| 258 | Glyma19g04990 | <b>0:21124310</b>        | 21124310 | YIELD         | Pod num 1-9    | PF01490 PTHR22950 KOG1305 AT5G38820.1 Transmembrane amino acid transporter family protein                                                                                                                                                                                                                                                       |

|     |               |                   |          |       |             |                                                                                                                                                                                                                        |
|-----|---------------|-------------------|----------|-------|-------------|------------------------------------------------------------------------------------------------------------------------------------------------------------------------------------------------------------------------|
| 259 | Glyma19g05000 | <b>0:21124310</b> | 21124310 | YIELD | Pod num 1-9 | PF01490 PTHR22950 KOG1305 AT5G38820.1 Transmembrane amino acid transporter family protein                                                                                                                              |
| 260 | Glyma19g05020 | <b>0:21124310</b> | 21124310 | YIELD | Pod num 1-9 | PF01747 PTHR24799:SF2,PTHR24799 KOG0636 GO:0004781,GO:0000103 AT3G22890.1 APS1 ATP sulfurylase 1                                                                                                                       |
| 261 | Glyma19g05030 | <b>0:21124310</b> | 21124310 | YIELD | Pod num 1-9 | PF00261 AT5G11390.1 WIT1 WPP domain-interacting protein 1                                                                                                                                                              |
| 262 | Glyma19g05040 | <b>0:21124310</b> | 21124310 | YIELD | Pod num 1-9 | PTHR22763 AT3G02340.1 RING/U-box superfamily protein                                                                                                                                                                   |
| 263 | Glyma19g05050 | <b>0:21124310</b> | 21124310 | YIELD | Pod num 1-9 | PF00170 PTHR22952:SF60,PTHR22952 GO:0003700,GO:0043565,GO:0046983,GO:0006355 AT3G30530.1 ATBZIP42,bZIP42 basic leucine-zipper 42                                                                                       |
| 264 | Glyma19g05060 | <b>0:21124310</b> | 21124310 | YIELD | Pod num 1-9 | PF01501 PTHR13778:SF3,PTHR13778 2.4.1.43 K13648 GO:0016757 AT3G02350.1 GAUT9 galacturonosyltransferase 9                                                                                                               |
| 265 | Glyma19g05080 | <b>0:21124310</b> | 21124310 | YIELD | Pod num 1-9 | PF00249 PTHR10641 KOG0048 GO:0003677 AT3G08500.1 AtMYB83,MYB83 myb domain protein 83                                                                                                                                   |
| 266 | Glyma19g05120 | <b>0:21124310</b> | 21124310 | YIELD | Pod num 1-9 | PF00393,PF03446 PTHR11811 KOG2653 1.1.1.44 K00033 GO:0004616,GO:0050661,GO:0006098,GO:0055114 AT3G02360.1 6-phosphogluconate dehydrogenase family protein                                                              |
| 267 | Glyma19g05130 | <b>0:21124310</b> | 21124310 | YIELD | Pod num 1-9 | PTHR11926:SF15,PTHR11926 GO:0016758,GO:0008152 AT1G78270.1 AtUGT85A4,UGT85A4 UDP-glucosyl transferase 85A4                                                                                                             |
| 268 | Glyma19g05140 | <b>0:21124310</b> | 21124310 | YIELD | Pod num 1-9 | PF00689,PF00702,PF00122,PF00690 PTHR24093,PTHR24093:SF73 KOG0204 3.6.3.8 K01537 GO:0000166,GO:0046872,GO:0003824,GO:0008152,GO:0016020,GO:0015662,GO:0006812,GO:0006754 AT3G22910.1 ATPase E1-E2 type family protein / |
| 269 | Glyma19g05150 | <b>0:21124310</b> | 21124310 | YIELD | Pod num 1-9 | AT5G57685.1 ATGDU3,GDU3,LSB1 glutamine dumper 3                                                                                                                                                                        |
| 270 | Glyma19g05170 | <b>0:21124310</b> | 21124310 | YIELD | Pod num 1-9 | PF00643,PF06203 KOG1601 GO:0008270,GO:0005622,GO:0005515 AT5G15840.1 CO,FG B-box type zinc finger protein with CCT domain                                                                                              |

**Supplementary Table 11. Candidate genes associated with maturity and growth habit in soybean.**

| Category                                       | Gene ID       | Name              | Reference                                                         |
|------------------------------------------------|---------------|-------------------|-------------------------------------------------------------------|
| <b>Maturity</b>                                | Glyma06g23040 | <i>E1</i>         | Watanabe et al. 2009; Tsubokura et al 2013; Langewisch et al 2014 |
|                                                | Glyma10g36600 | <i>E2</i>         |                                                                   |
|                                                | Glyma19g41210 | <i>E3</i>         |                                                                   |
|                                                | Glyma20g22160 | <i>E4</i>         |                                                                   |
| Growth type<br>(Determinate and Indeterminate) | Glyma19g37890 | <i>DT1</i>        | Tian et al 2010                                                   |
|                                                | Glyma03g35250 | <i>DT1-A/TFL1</i> |                                                                   |
|                                                | Glyma10g08340 | <i>DT2</i>        |                                                                   |
|                                                | Glyma13g22030 | <i>DT2-A</i>      |                                                                   |

**Supplementary Table 12. Allelic variation for maturity genes in soybean.** (a) Allelic variation for maturity and determinate/indeterminate growth loci. (b) Details of major maturity genes used for haplogroup analysis.

(a)

| Seq Id | MG  | Region/ Country    | Growth           | Type      | <i>E1, e1-as,<br/>e1-fs, e1-nl</i> | <i>E2, e2</i> | <i>E3, e3,<br/>E3-Short</i> | <i>E4, e4-kes,<br/>e4-SORE1,</i> | <i>DT1, dt1-<br/>1(R62S), dt1-2<br/>(P113L), dt1-3<br/>(R130K), dt1-4<br/>(R166W)</i> | <i>DT2,<br/>dt2</i> |
|--------|-----|--------------------|------------------|-----------|------------------------------------|---------------|-----------------------------|----------------------------------|---------------------------------------------------------------------------------------|---------------------|
| HN105  | 0   | Sweden             | Determinate      | Elite     | <i>e1-nl</i>                       | <i>e2/E2*</i> | <i>e3</i>                   | <i>E4</i>                        | <i>dt1-4</i>                                                                          | <i>dt2</i>          |
| HN037  | I   | Japan              | Determinate      | Elite     | <i>E1</i>                          | <i>e2/E2*</i> | <i>e3</i>                   | <i>E4</i>                        | <i>dt1-4</i>                                                                          | <i>DT2</i>          |
| HN011  | I   | Japan              | Determinate      | Land Race | <i>e1-as</i>                       | <i>E2</i>     | <i>e3</i>                   | <i>E4</i>                        | <i>dt1-1</i>                                                                          | <i>DT2</i>          |
| HN010  | II  | China              | Non-determinate  | Land Race | <i>E1</i>                          | <i>E2</i>     | <i>E3</i>                   | <i>E4</i>                        | <i>DT-1</i>                                                                           | <i>DT2</i>          |
| HN060  | II  | China              | Non-determinate  | Land Race | <i>E1</i>                          | <i>E2</i>     | <i>E3</i>                   | <i>E4</i>                        | <i>DT-1</i>                                                                           | <i>DT2</i>          |
| HN062  | II  | China              | Semi-determinate | Elite     | <i>E1</i>                          | <i>E2</i>     | <i>E3</i>                   | <i>E4</i>                        | <i>DT-1</i>                                                                           | <i>DT2</i>          |
| HN063  | II  | China              | Non-determinate  | Wild      | <i>E1</i>                          | <i>E2*</i>    | <i>E3</i>                   | <i>E4*</i>                       | <i>DT-1</i>                                                                           | <i>DT2</i>          |
| HN056  | II  | China              | Non-determinate  | Elite     | <i>E1</i>                          | <i>e2/E2*</i> | <i>E3</i>                   | <i>E4</i>                        | <i>DT-1</i>                                                                           | <i>dt2</i>          |
| HN054  | II  | Russian Federation | Non-determinate  | Elite     | <i>e1-as</i>                       | <i>E2*</i>    | <i>E3</i>                   | <i>E4</i>                        | <i>DT-1</i>                                                                           | <i>DT2</i>          |
| HN064  | II  | Former Serbia      | Non-determinate  | Elite     | <i>e1-as</i>                       | <i>e2/E2*</i> | <i>E3</i>                   | <i>E4</i>                        | <i>DT-1</i>                                                                           | <i>dt2</i>          |
| HN070  | II  | U.S.               | Non-determinate  | Elite     | <i>e1-as</i>                       | <i>e2/E2*</i> | <i>E3</i>                   | <i>E4</i>                        | <i>DT-1</i>                                                                           | <i>dt2</i>          |
| HN057  | II  | China              | Non-determinate  | Elite     | <i>e1-as</i>                       | <i>E2</i>     | <i>e3</i>                   | <i>E4</i>                        | <i>DT-1</i>                                                                           | <i>DT2</i>          |
| HN106  | II  | Japan              | Non-determinate  | Land Race | <i>E1</i>                          | <i>E2</i>     | <i>E3</i>                   | <i>E4</i>                        | <i>DT-1</i>                                                                           | <i>DT2</i>          |
| HN005  | III | China              | Non-determinate  | Land Race | <i>E1</i>                          | <i>E2</i>     | <i>E3</i>                   | <i>E4</i>                        | <i>dt1-1</i>                                                                          | <i>dt2</i>          |
| HN008  | III | China              | Non-determinate  | Land Race | <i>E1</i>                          | <i>E2</i>     | <i>E3</i>                   | <i>E4</i>                        | <i>DT-1</i>                                                                           | <i>dt2</i>          |
| HN015  | III | China              | Non-determinate  | Land Race | <i>E1</i>                          | <i>E2</i>     | <i>E3</i>                   | <i>E4</i>                        | <i>DT-1</i>                                                                           | <i>dt2</i>          |
| HN018  | III | China              | Semi-determinate | Land Race | <i>E1</i>                          | <i>E2</i>     | <i>E3</i>                   | <i>E4</i>                        | <i>dt1-1</i>                                                                          | <i>dt2</i>          |
| HN020  | III | China              | Non-determinate  | Land Race | <i>E1</i>                          | <i>E2</i>     | <i>E3</i>                   | <i>E4</i>                        | <i>DT-1</i>                                                                           | <i>dt2</i>          |
| HN024  | III | China              | Non-determinate  | Land Race | <i>E1</i>                          | <i>E2</i>     | <i>E3</i>                   | <i>E4</i>                        | <i>DT-1</i>                                                                           | <i>dt2</i>          |
| HN026  | III | North Korea        | Non-determinate  | Land Race | <i>E1</i>                          | <i>E2</i>     | <i>E3</i>                   | <i>E4</i>                        | <i>DT-1</i>                                                                           | <i>dt2</i>          |
| HN068  | III | North Korea        | Non-determinate  | Land Race | <i>E1</i>                          | <i>E2</i>     | <i>E3</i>                   | <i>E4</i>                        | <i>DT-1</i>                                                                           | <i>DT2</i>          |
| HN072  | III | China              | Non-determinate  | Land Race | <i>E1</i>                          | <i>E2</i>     | <i>E3</i>                   | <i>E4</i>                        | <i>DT-1</i>                                                                           | <i>DT2</i>          |
| HN081  | III | China              | Non-determinate  | Elite     | <i>E1</i>                          | <i>E2*</i>    | <i>E3</i>                   | <i>E4</i>                        | <i>DT-1</i>                                                                           | <i>dt2</i>          |
| HN097  | III | China              | Determinate      | Land Race | <i>E1</i>                          | <i>e2*</i>    | <i>e3</i>                   | <i>E4</i>                        | <i>dt1-1</i>                                                                          | <i>DT2</i>          |
| HN051  | III | South Korea        | Non-determinate  | Land Race | <i>E1</i>                          | <i>E2*</i>    | <i>e3</i>                   | <i>E4</i>                        | <i>DT-1</i>                                                                           | <i>DT2</i>          |
| HN034  | III | Japan              | Non-determinate  | Land Race | <i>E1</i>                          | <i>E2</i>     | <i>E3-Short</i>             | <i>E4</i>                        | <i>DT-1</i>                                                                           | <i>DT2</i>          |
| HN031  | III | China              | Non-determinate  | Land Race | <i>E1</i>                          | <i>E2*</i>    | <i>E3-Short</i>             | <i>E4</i>                        | <i>dt1-4</i>                                                                          | <i>DT2</i>          |
| HN059  | III | China              | Determinate      | Elite     | <i>E1</i>                          | <i>e2/E2*</i> | <i>E3-Short</i>             | <i>E4</i>                        | <i>dt1-4</i>                                                                          | <i>dt2</i>          |
| HN067  | III | China              | Non-determinate  | Land Race | <i>E1</i>                          | <i>e2/E2*</i> | <i>E3-Short</i>             | <i>E4</i>                        | <i>DT-1</i>                                                                           | <i>DT2</i>          |
| HN079  | III | China              | Non-determinate  | Land Race | <i>E1</i>                          | <i>e2/E2*</i> | <i>E3-Short</i>             | <i>E4</i>                        | <i>DT-1</i>                                                                           | <i>DT2</i>          |
| HN084  | III | China              | Semi-determinate | Elite     | <i>E1</i>                          | <i>e2/E2*</i> | <i>E3-Short</i>             | <i>E4</i>                        | <i>DT-1</i>                                                                           | <i>DT2</i>          |
| HN086  | III | China              | Semi-determinate | Elite     | <i>E1</i>                          | <i>e2/E2*</i> | <i>E3-Short</i>             | <i>E4</i>                        | <i>dt1-1</i>                                                                          | <i>DT2</i>          |
| HN107  | III | Japan              | Determinate      | Elite     | <i>E1</i>                          | <i>e2/E2*</i> | <i>E3-Short</i>             | <i>E4</i>                        | <i>dt1-4</i>                                                                          | <i>dt2</i>          |

|       |     |             |                  |           |              |               |                 |            |                     |            |
|-------|-----|-------------|------------------|-----------|--------------|---------------|-----------------|------------|---------------------|------------|
| HN029 | III | U.S.        | N/A              | Elite     | <i>e1-as</i> | <i>E2</i>     | <i>E3</i>       | <i>E4</i>  | <i>DT-1</i>         | <i>DT2</i> |
| HN030 | III | U.S.        | Non-determinate  | Elite     | <i>e1-as</i> | <i>E2</i>     | <i>E3</i>       | <i>E4</i>  | <i>DT-1</i>         | <i>DT2</i> |
| HN033 | III | North Korea | Non-determinate  | Elite     | <i>e1-as</i> | <i>e2</i>     | <i>E3</i>       | <i>E4</i>  | <i>DT-1</i>         | <i>DT2</i> |
| HN065 | III | U.S.        | Non-determinate  | Elite     | <i>e1-as</i> | <i>E2</i>     | <i>E3</i>       | <i>E4</i>  | <i>DT-1</i>         | <i>DT2</i> |
| HN066 | III | U.S.        | Non-determinate  | Elite     | <i>e1-as</i> | <i>E2</i>     | <i>E3</i>       | <i>E4</i>  | <i>DT-1</i>         | <i>DT2</i> |
| HN073 | III | U.S.        | Non-determinate  | Elite     | <i>e1-as</i> | <i>E2</i>     | <i>E3</i>       | <i>E4</i>  | <i>DT-1</i>         | <i>dt2</i> |
| HN087 | III | U.S.        | Non-determinate  | Elite     | <i>e1-as</i> | <i>E2</i>     | <i>E3</i>       | <i>E4</i>  | <i>DT-1</i>         | <i>DT2</i> |
| HN088 | III | N/A         | Non-determinate  | Elite     | <i>e1-as</i> | <i>E2</i>     | <i>E3</i>       | <i>E4</i>  | <i>DT-1</i>         | <i>DT2</i> |
| HN092 | III | U.S.        | Non-determinate  | Elite     | <i>e1-as</i> | <i>E2</i>     | <i>E3</i>       | <i>E4</i>  | <i>DT-1</i>         | <i>DT2</i> |
| HN032 | III | Japan       | Non-determinate  | Land Race | <i>e1-as</i> | <i>E2*</i>    | <i>E3</i>       | <i>E4</i>  | <i>DT-1</i>         | <i>DT2</i> |
| HN038 | IV  | Japan       | Determinate      | Elite     | <i>E1</i>    | <i>e2/E2*</i> | <i>e3</i>       | <i>E4</i>  | <i>dt1-4</i>        | <i>DT2</i> |
| HN002 | IV  | China       | Determinate      | Land Race | <i>E1</i>    | <i>E2</i>     | <i>E3</i>       | <i>E4</i>  | <i>dt1-1</i>        | <i>dt2</i> |
| HN003 | IV  | China       | Non-determinate  | Land Race | <i>E1</i>    | <i>E2</i>     | <i>E3</i>       | <i>E4</i>  | <i>dt1-1</i>        | <i>DT2</i> |
| HN004 | IV  | China       | Non-determinate  | Land Race | <i>E1</i>    | <i>E2</i>     | <i>E3</i>       | <i>E4</i>  | <i>DT-1</i>         | <i>dt2</i> |
| HN017 | IV  | China       | Semi-determinate | Land Race | <i>E1</i>    | <i>E2</i>     | <i>E3</i>       | <i>E4</i>  | <i>dt1-1</i>        | <i>dt2</i> |
| HN019 | IV  | China       | Determinate      | Land Race | <i>E1</i>    | <i>E2</i>     | <i>E3</i>       | <i>E4</i>  | <i>dt1-1</i>        | <i>DT2</i> |
| HN021 | IV  | Japan       | Non-determinate  | Land Race | <i>E1</i>    | <i>E2</i>     | <i>E3</i>       | <i>E4</i>  | <i>DT-1</i>         | <i>dt2</i> |
| HN047 | IV  | China       | Non-determinate  | Land Race | <i>E1</i>    | <i>E2</i>     | <i>E3</i>       | <i>E4</i>  | <i>DT-1</i>         | <i>dt2</i> |
| HN055 | IV  | China       | Semi-determinate | Land Race | <i>E1</i>    | <i>E2</i>     | <i>E3</i>       | <i>E4</i>  | <i>dt1-1</i>        | <i>dt2</i> |
| HN069 | IV  | China       | Non-determinate  | Land Race | <i>E1</i>    | <i>E2</i>     | <i>E3</i>       | <i>E4</i>  | <i>DT-1</i>         | <i>dt2</i> |
| HN012 | IV  | China       | Non-determinate  | Land Race | <i>E1</i>    | <i>E2*</i>    | <i>E3</i>       | <i>E4</i>  | <i>DT-1</i>         | <i>dt2</i> |
| HN016 | IV  | China       | Non-determinate  | Land Race | <i>E1</i>    | <i>E2*</i>    | <i>E3</i>       | <i>E4</i>  | <i>DT-1</i>         | <i>DT2</i> |
| HN022 | IV  | China       | Non-determinate  | Land Race | <i>E1</i>    | <i>E2*</i>    | <i>E3</i>       | <i>E4</i>  | <i>DT-1</i>         | <i>dt2</i> |
| HN025 | IV  | China       | Non-determinate  | Land Race | <i>E1</i>    | <i>E2*</i>    | <i>E3</i>       | <i>E4</i>  | <i>DT-1</i>         | <i>dt2</i> |
| HN039 | IV  | Japan       | N/A              | Wild      | <i>E1</i>    | <i>E2*</i>    | <i>E3</i>       | <i>E4*</i> | <i>DT-1</i>         | <i>DT2</i> |
| HN040 | IV  | Japan       | N/A              | Wild      | <i>E1</i>    | <i>E2*</i>    | <i>E3</i>       | <i>E4*</i> | <i>DT-1</i>         | <i>dt2</i> |
| HN045 | IV  | South Korea | N/A              | Wild      | <i>E1</i>    | <i>E2*</i>    | <i>E3</i>       | <i>E4*</i> | <i>DT-1</i>         | <i>DT2</i> |
| HN046 | IV  | South Korea | N/A              | Wild      | <i>E1</i>    | <i>E2*</i>    | <i>E3</i>       | <i>E4*</i> | <i>DT-1</i>         | <i>dt2</i> |
| HN052 | IV  | South Korea | N/A              | Wild      | <i>E1</i>    | <i>E2*</i>    | <i>E3</i>       | <i>E4*</i> | <i>DT-1</i>         | <i>DT2</i> |
| HN053 | IV  | South Korea | N/A              | Wild      | <i>E1</i>    | <i>E2*</i>    | <i>E3</i>       | <i>E4*</i> | <i>DT-1</i>         | <i>dt2</i> |
| HN058 | IV  | China       | Semi-determinate | Land Race | <i>E1</i>    | <i>E2*</i>    | <i>E3</i>       | <i>E4</i>  | <i>dt1-1, dt1-4</i> | <i>DT2</i> |
| HN076 | IV  | China       | Non-determinate  | Land Race | <i>E1</i>    | <i>E2*</i>    | <i>E3</i>       | <i>E4</i>  | <i>DT-1</i>         | <i>dt2</i> |
| HN007 | IV  | South Korea | Non-determinate  | Land Race | <i>E1</i>    | <i>E2*</i>    | <i>e3</i>       | <i>E4</i>  | <i>DT-1</i>         | <i>dt2</i> |
| HN023 | IV  | South Korea | Non-determinate  | Land Race | <i>E1</i>    | <i>E2*</i>    | <i>e3</i>       | <i>E4</i>  | <i>DT-1</i>         | <i>DT2</i> |
| HN094 | IV  | North Korea | Determinate      | Elite     | <i>E1</i>    | <i>e2*</i>    | <i>e3</i>       | <i>E4</i>  | <i>dt1-4</i>        | <i>DT2</i> |
| HN095 | IV  | North Korea | Determinate      | Elite     | <i>E1</i>    | <i>e2*</i>    | <i>e3</i>       | <i>E4</i>  | <i>dt1-4</i>        | <i>DT2</i> |
| HN006 | IV  | South Korea | Determinate      | Elite     | <i>E1</i>    | <i>e2/E2*</i> | <i>e3</i>       | <i>E4</i>  | <i>dt1-4</i>        | <i>DT2</i> |
| HN096 | IV  | North Korea | Non-determinate  | Elite     | <i>E1</i>    | <i>E2</i>     | <i>e3</i>       | <i>E4</i>  | <i>DT-1</i>         | <i>DT2</i> |
| HN009 | IV  | China       | Non-determinate  | Land Race | <i>E1</i>    | <i>E2*</i>    | <i>E3-Short</i> | <i>E4</i>  | <i>DT-1</i>         | <i>DT2</i> |
| HN049 | IV  | South Korea | Determinate      | Elite     | <i>E1</i>    | <i>e2/E2*</i> | <i>E3-Short</i> | <i>E4</i>  | <i>dt1-4</i>        | <i>DT2</i> |
| HN078 | IV  | China       | Non-determinate  | Land Race | <i>E1</i>    | <i>e2/E2*</i> | <i>E3-Short</i> | <i>E4</i>  | <i>DT-1</i>         | <i>dt2</i> |
| HN082 | IV  | China       | Non-determinate  | Elite     | <i>E1</i>    | <i>e2/E2*</i> | <i>E3-Short</i> | <i>E4</i>  | <i>DT-1</i>         | <i>dt2</i> |
| HN083 | IV  | China       | Semi-determinate | Elite     | <i>E1</i>    | <i>e2/E2*</i> | <i>E3-Short</i> | <i>E4</i>  | <i>DT-1</i>         | <i>DT2</i> |
| HN085 | IV  | China       | Non-determinate  | Elite     | <i>E1</i>    | <i>e2/E2*</i> | <i>E3-Short</i> | <i>E4</i>  | <i>DT-1</i>         | <i>DT2</i> |



|       |       |             |                  |           |              |               |                 |           |              |            |
|-------|-------|-------------|------------------|-----------|--------------|---------------|-----------------|-----------|--------------|------------|
| HN091 | IV    | China       | Semi-determinate | Elite     | <i>E1</i>    | <i>e2/E2*</i> | <i>E3-Short</i> | <i>E4</i> | <i>DT-1</i>  | <i>DT2</i> |
| HN099 | IV    | U.S.        | Non-determinate  | Elite     | <i>e1-as</i> | <i>E2</i>     | <i>E3</i>       | <i>E4</i> | <i>DT-1</i>  | <i>DT2</i> |
| HN102 | IV    | U.S.        | Non-determinate  | Elite     | <i>e1-as</i> | <i>E2</i>     | <i>E3</i>       | <i>E4</i> | <i>DT-1</i>  | <i>DT2</i> |
| HN089 | IV, V | South Korea | Determinate      | Elite     | <i>E1</i>    | <i>e2/E2*</i> | <i>E3-Short</i> | <i>E4</i> | <i>dt1-4</i> | <i>DT2</i> |
| HN013 | IV,V  | U.S.        | Determinate      | Elite     | <i>E1</i>    | <i>E2</i>     | <i>E3</i>       | <i>E4</i> | <i>dt1-4</i> | <i>DT2</i> |
| HN027 | N/A   | U.S.        | Non-determinate  | Elite     | <i>e1-as</i> | <i>E2</i>     | <i>E3</i>       | <i>E4</i> | <i>DT-1</i>  | <i>DT2</i> |
| HN035 | V     | South Korea | Determinate      | Elite     | <i>E1</i>    | <i>E2</i>     | <i>e3</i>       | <i>E4</i> | <i>dt1-4</i> | <i>dt2</i> |
| HN041 | V     | South Korea | Determinate      | Elite     | <i>E1</i>    | <i>E2*</i>    | <i>e3</i>       | <i>E4</i> | <i>dt1-4</i> | <i>dt2</i> |
| HN042 | V     | South Korea | Determinate      | Elite     | <i>E1</i>    | <i>E2*</i>    | <i>e3</i>       | <i>E4</i> | <i>dt1-4</i> | <i>DT2</i> |
| HN043 | V     | South Korea | Semi-determinate | Elite     | <i>E1</i>    | <i>E2*</i>    | <i>e3</i>       | <i>E4</i> | <i>dt1-4</i> | <i>DT2</i> |
| HN044 | V     | South Korea | Semi-determinate | Elite     | <i>E1</i>    | <i>E2*</i>    | <i>e3</i>       | <i>E4</i> | <i>dt1-4</i> | <i>DT2</i> |
| HN028 | V     | U.S.        | Determinate      | Elite     | <i>E1</i>    | <i>E2</i>     | <i>E3</i>       | <i>E4</i> | <i>dt1-4</i> | <i>dt2</i> |
| HN001 | V     | U.S.        | Determinate      | Elite     | <i>E1</i>    | <i>E2*</i>    | <i>E3</i>       | <i>E4</i> | <i>dt1-4</i> | <i>DT2</i> |
| HN061 | V     | Nepal       | Non-determinate  | Elite     | <i>E1</i>    | <i>E2*</i>    | <i>E3</i>       | <i>E4</i> | <i>dt1-4</i> | <i>dt2</i> |
| HN075 | V     | China       | Non-determinate  | Land Race | <i>E1</i>    | <i>E2*</i>    | <i>E3</i>       | <i>E4</i> | <i>DT-1</i>  | <i>dt2</i> |
| HN077 | V     | China       | Non-determinate  | Land Race | <i>E1</i>    | <i>E2*</i>    | <i>E3</i>       | <i>E4</i> | <i>DT-1</i>  | <i>dt2</i> |
| HN074 | V     | China       | Non-determinate  | Elite     | <i>E1</i>    | <i>e2/E2*</i> | <i>E3</i>       | <i>E4</i> | <i>DT-1</i>  | <i>DT2</i> |
| HN080 | V     | China       | Semi-determinate | Land Race | <i>E1</i>    | <i>e2/E2*</i> | <i>E3</i>       | <i>E4</i> | <i>dt1-1</i> | <i>dt2</i> |
| HN048 | V     | South Korea | Non-determinate  | Elite     | <i>E1</i>    | <i>E2*</i>    | <i>e3</i>       | <i>E4</i> | <i>DT-1</i>  | <i>dt2</i> |
| HN093 | V     | North Korea | Determinate      | Elite     | <i>E1</i>    | <i>E2*</i>    | <i>e3</i>       | <i>E4</i> | <i>dt1-4</i> | <i>DT2</i> |
| HN014 | V     | U.S.        | Determinate      | Elite     | <i>E1</i>    | <i>E2</i>     | <i>E3-Short</i> | <i>E4</i> | <i>dt1-4</i> | <i>DT2</i> |
| HN098 | V     | Vietnam     | Non-determinate  | Elite     | <i>E1</i>    | <i>E2*</i>    | <i>E3-Short</i> | <i>E4</i> | <i>DT-1</i>  | <i>DT2</i> |
| HN104 | VI    | N/A         | Non-determinate  | Land Race | <i>E1</i>    | <i>E2*</i>    | <i>E3</i>       | <i>E4</i> | <i>DT-1</i>  | <i>DT2</i> |
| HN103 | VI    | U.S.        | N/A              | Elite     | <i>E1</i>    | <i>E2*</i>    | <i>e3</i>       | <i>E4</i> | <i>dt1-4</i> | <i>DT2</i> |
| HN050 | VI    | Japan       | Determinate      | Elite     | <i>E1</i>    | <i>e2/E2*</i> | <i>E3-Short</i> | <i>E4</i> | <i>dt1-4</i> | <i>DT2</i> |
| HN071 | VII   | U.S.        | Determinate      | Elite     | <i>E1</i>    | <i>E2*</i>    | <i>E3</i>       | <i>E4</i> | <i>dt1-4</i> | <i>DT2</i> |
| HN090 | VII   | China       | Determinate      | Elite     | <i>E1</i>    | <i>E2*</i>    | <i>E3-Short</i> | <i>E4</i> | <i>dt1-4</i> | <i>DT2</i> |
| HN101 | VII   | N/A         | Non-determinate  | Elite     | <i>e1-as</i> | <i>E2</i>     | <i>E3</i>       | <i>E4</i> | <i>DT-1</i>  | <i>DT2</i> |
| HN100 | VIII  | U.S.        | Determinate      | Elite     | <i>E1</i>    | <i>E2</i>     | <i>E3</i>       | <i>E4</i> | <i>dt1-4</i> | <i>DT2</i> |

(b)

| Gene | Glyma         | Chromosome coordinates | Known Allele | Polymorphism type/ Position | Amino acid change | Found in current study |
|------|---------------|------------------------|--------------|-----------------------------|-------------------|------------------------|
| E1   | Glyma06g23040 | 20006928 -20007814     | E1           | SNP (Gm06:20007173)         | R15T              | Yes                    |
|      |               |                        | <i>e1-as</i> | -                           | -                 | Yes                    |
|      |               |                        | <i>e1-fs</i> | Indel: A (Gm06:20007178)    | Frameshift        | No                     |
|      |               |                        | <i>e1-nl</i> | Gene deletion               | Null Protein      | Yes                    |
| E2   | Glyma10g36600 | 44716804–44738165      | <i>e2</i>    | SNP (Gm10:44732850)         | K521*             | Yes                    |
|      |               |                        | <i>E2*</i>   | SNP (Gm10:44727337)         | I220V             | Yes                    |
| E3   | Glyma19g41210 | 47512505–47519937      | E3 (Short)   |                             | No change         | Yes                    |

|     |               |                   |             |                                                          |            |     |
|-----|---------------|-------------------|-------------|----------------------------------------------------------|------------|-----|
|     |               |                   |             | 2.6 Kb deletion in intron 3<br>(Gm19: 47516697-47519330) |            |     |
|     |               |                   | e3          | 15.5 Kb deletion (Gm19:<br>47531605-47516603)            | Frameshift | Yes |
|     |               |                   | e3-ft3      | SNP (Gm19: 47516339)                                     | G1050R     | No  |
| E4  | Glyma20g22160 | 32087661–32093266 | E4*         | SNP (Gm20: 32088844)                                     | L151S      | Yes |
|     |               |                   | e4 (SORE-1) | Retrotransposome insertion<br>(Gm20: 32089086)           | Frameshift | No  |
|     |               |                   | e4-oto      | Indel (Gm20: 32089731)                                   | Frameshift | No  |
|     |               |                   | e4-tsu      | Indel (Gm20: 32091045)                                   | Frameshift | No  |
|     |               |                   | e4-kam      | Indel Gm20: 32091473                                     | Frameshift | No  |
|     |               |                   | e4-kes      | Indel (Gm20: 32091662)                                   | Frameshift | No  |
| DT1 | Glyma19g37890 | 44979743–44981385 | dt1-1       | SNP (Gm19: 44981190)                                     | R62S       | Yes |
|     |               |                   | dt1-2       | SNP (Gm19: 44980245)                                     | P113L      | No  |
|     |               |                   | dt1-3       | SNP (Gm19: 44980194)                                     | R130K      | No  |
|     |               |                   | dt1-4       | SNP (Gm19: 44980087)                                     | R166W      | Yes |
| DT2 | Glyma10g08340 | 7175357 - 7177049 | dt2         | SNP (Gm10: 7176981)                                      | T06K       | Yes |

1. Locus names were used or modified from published data (Langewisch et al 2014)

2. E2\* Non\_Syn\_SNP I220V for E2 locus is not reported previously

3. E4\* SNP <L151S> for E4 locus is not reported previously

**Supplementary Table 13. Total oil and protein content in 106 soybean lines**

| Type  | Germplasm identifier | Total oil (%) | Total protein (%) |       |
|-------|----------------------|---------------|-------------------|-------|
| Wild  | HN031                | 12.56         | 38.55             |       |
|       | HN032                | 20.51         | 41.26             |       |
|       | HN039                | 10.88         | 39.80             |       |
|       | HN040                | 10.44         | 49.18             |       |
|       | HN045                | 9.84          | 45.85             |       |
|       | HN046                | 5.76          | 42.14             |       |
|       | HN051                | 14.05         | 43.51             |       |
|       | HN052                | 10.56         | 37.43             |       |
|       | HN053                | 12.16         | 45.02             |       |
|       | HN063                | 19.93         | 41.11             |       |
|       | Elite                | HN001         | 21.88             | 36.56 |
|       |                      | HN006         | 17.1              | 39.68 |
|       |                      | HN013         | 21.11             | 39.43 |
| HN014 |                      | 21.14         | 39.41             |       |
| HN027 |                      | 21.28         | 40.80             |       |
| HN028 |                      | 20.77         | 42.32             |       |
| HN029 |                      | 22.26         | 39.05             |       |
| HN030 |                      | 21.32         | 41.71             |       |
| HN033 |                      | 18.99         | 42.07             |       |
| HN035 |                      | 16.09         | 48.75             |       |
| HN037 |                      | 18.54         | 39.03             |       |
| HN041 |                      | 12.43         | 47.86             |       |
| HN042 |                      | 10.65         | 44.12             |       |
| HN043 |                      | 17            | 45.23             |       |
| HN044 |                      | 14.32         | 44.26             |       |
| HN048 |                      | 20.02         | 47.82             |       |
| HN049 |                      | 15.78         | 38.79             |       |
| HN050 |                      | 22.99         | 37.14             |       |
| HN054 |                      | 21.8          | 41.25             |       |
| HN056 |                      | 18.06         | 40.51             |       |
| HN057 |                      | 21.04         | 44.15             |       |
| HN059 |                      | 22.76         | 46.24             |       |
| HN061 |                      | 22.02         | 40.97             |       |
| HN062 |                      | 21.09         | 41.36             |       |
| HN064 |                      | 22.88         | 41.20             |       |
| HN065 |                      | 20.37         | 43.94             |       |
| HN066 |                      | 21.19         | 41.19             |       |
| HN070 |                      | 24.21         | 40.88             |       |
| HN071 |                      | 19.01         | 43.06             |       |

|           |       |       |       |
|-----------|-------|-------|-------|
|           | HN073 | 23.64 | 41.79 |
|           | HN074 | 18.69 | 42.06 |
|           | HN083 | 19.93 | 40.01 |
|           | HN084 | 18.79 | 43.29 |
|           | HN085 | 21.71 | 40.47 |
|           | HN086 | 19.69 | 44.33 |
|           | HN087 | 20.45 | 42.08 |
|           | HN088 | 22.37 | 40.70 |
|           | HN089 | 17.46 | 40.11 |
|           | HN090 | 14.24 | 42.24 |
|           | HN091 | 17.98 | 38.68 |
|           | HN092 | 22.4  | 41.28 |
|           | HN094 | 17.99 | 46.50 |
|           | HN095 | 17.46 | 42.41 |
|           | HN096 | 20    | 44.46 |
|           | HN098 | 15.56 | 47.70 |
|           | HN099 | 21.02 | 39.74 |
|           | HN100 | 19.5  | 42.64 |
|           | HN101 | 20.98 | 38.63 |
|           | HN102 | 21.23 | 42.30 |
|           | HN103 | 20.84 | 41.60 |
|           | HN105 | 18.29 | 46.13 |
|           | HN107 | 18.52 | 39.17 |
|           | HN002 | 17.99 | 41.05 |
|           | HN003 | 15.33 | 42.60 |
|           | HN004 | 17.12 | 39.65 |
|           | HN005 | 18.76 | 40.50 |
|           | HN007 | 20.06 | 43.37 |
|           | HN008 | 17.37 | 38.81 |
|           | HN009 | 20.29 | 39.60 |
|           | HN010 | 18.42 | 40.17 |
|           | HN011 | 19.3  | 41.46 |
|           | HN012 | 16.05 | 30.39 |
|           | HN015 | 17.65 | 39.19 |
| Land Race | HN016 | 15.6  | 39.20 |
|           | HN017 | 18.76 | 38.89 |
|           | HN018 | 17.12 | 39.27 |
|           | HN020 | 18.32 | 40.57 |
|           | HN021 | 17.52 | 39.21 |
|           | HN022 | 16.17 | 41.52 |
|           | HN023 | 18.26 | 44.54 |
|           | HN024 | 18.85 | 40.91 |
|           | HN025 | 15.5  | 38.16 |
|           | HN026 | 20.26 | 42.92 |
|           | HN034 | 11.88 | 37.90 |
|           | HN047 | 16.79 | 48.23 |

|  |       |       |       |
|--|-------|-------|-------|
|  | HN055 | 19.88 | 40.76 |
|  | HN058 | 19.04 | 39.71 |
|  | HN060 | 14.69 | 39.81 |
|  | HN067 | 20.76 | 41.02 |
|  | HN068 | 19.38 | 39.17 |
|  | HN069 | 18.51 | 40.37 |
|  | HN072 | 23.59 | 41.72 |
|  | HN075 | 16.03 | 41.52 |
|  | HN076 | 14.23 | 37.33 |
|  | HN077 | 19.68 | 40.77 |
|  | HN078 | 20.37 | 40.63 |
|  | HN079 | 20.52 | 47.13 |
|  | HN080 | 17.25 | 37.49 |
|  | HN097 | 16.53 | 47.16 |
|  | HN104 | 20.11 | 43.57 |
|  | HN106 | 18.56 | 42.21 |

---

**Supplementary Table 14. Copy number variation on genes associated with oil traits in soybean**

|                                            | HN070 VS HN046 |       |             | HN070 VS HN063 |       |             | HN046 VS HN063 |       |             |
|--------------------------------------------|----------------|-------|-------------|----------------|-------|-------------|----------------|-------|-------------|
|                                            | HN070          | HN046 | Gene number | HN070          | HN063 | Gene number | HN046          | HN063 | Gene number |
| Copy number<br>increase in individual<br>1 | +              | -     | 33          | +              | -     | 39          | +              | -     | 49          |
|                                            | +              | =     | 260         | +              | =     | 296         | +              | =     | 352         |
|                                            | =              | -     | 1372        | =              | -     | 1008        | =              | -     | 823         |
| Summary                                    |                |       | 1665        |                |       | 1343        |                |       | 1224        |
| Copy number<br>increas in individual<br>2  | -              | +     | 19          | -              | +     | 17          | -              | +     | 17          |
|                                            | -              | =     | 485         | -              | =     | 467         | -              | =     | 1193        |
|                                            | =              | +     | 322         | =              | +     | 292         | =              | +     | 310         |
| Summary                                    |                |       | 826         |                |       | 776         |                |       | 1520        |
| Total                                      |                |       | 2491        |                |       | 2119        |                |       | 2744        |

**+ for more copy number compared with the reference, - for less copy number, = for no variation. HN070: highest oil, HN046: lowest oil, HN063: wild soybean**

**Supplementary Table 15. Copy number variations in total protein trait related genes**

|                                      | HN040 VS HN012 |       |             | HN040 VS HN063 |       |             | HN012 VS HN063 |       |             |
|--------------------------------------|----------------|-------|-------------|----------------|-------|-------------|----------------|-------|-------------|
|                                      | HN040          | HN012 | Gene number | HN040          | HN063 | Gene number | HN012          | HN063 | Gene number |
| Copy number increase in individual 1 | +              | -     | 24          | +              | -     | 20          | +              | -     | 20          |
|                                      | +              | =     | 262         | +              | =     | 296         | +              | =     | 343         |
|                                      | =              | -     | 1408        | =              | -     | 889         | =              | -     | 847         |
| Summary                              |                |       | 1694        |                |       | 1205        |                |       | 1210        |
| Copy number increase in individual 2 | -              | +     | 32          | -              | +     | 26          | -              | +     | 18          |
|                                      | -              | =     | 987         | -              | =     | 1006        | -              | =     | 1385        |
|                                      | =              | +     | 310         | =              | +     | 289         | =              | +     | 288         |
| Summary                              |                |       | 1329        |                |       | 1321        |                |       | 1691        |
| Total                                |                |       | 3023        |                |       | 2526        |                |       | 2901        |

**+ for more copy number compared with the reference, - for less copy number, = for no variation. HN040: highest protein  
HN012: lowest protein HN063: wild**

**Supplementary Figure 1. Missing rate of SNPs for 106 soybean germplasm sequences.** Proportion of 106 individuals with missing genotype at each SNP loci was calculated. Distribution of the missing genotype proportions was shown in this figure. Majority of the SNPs had low missing rate.

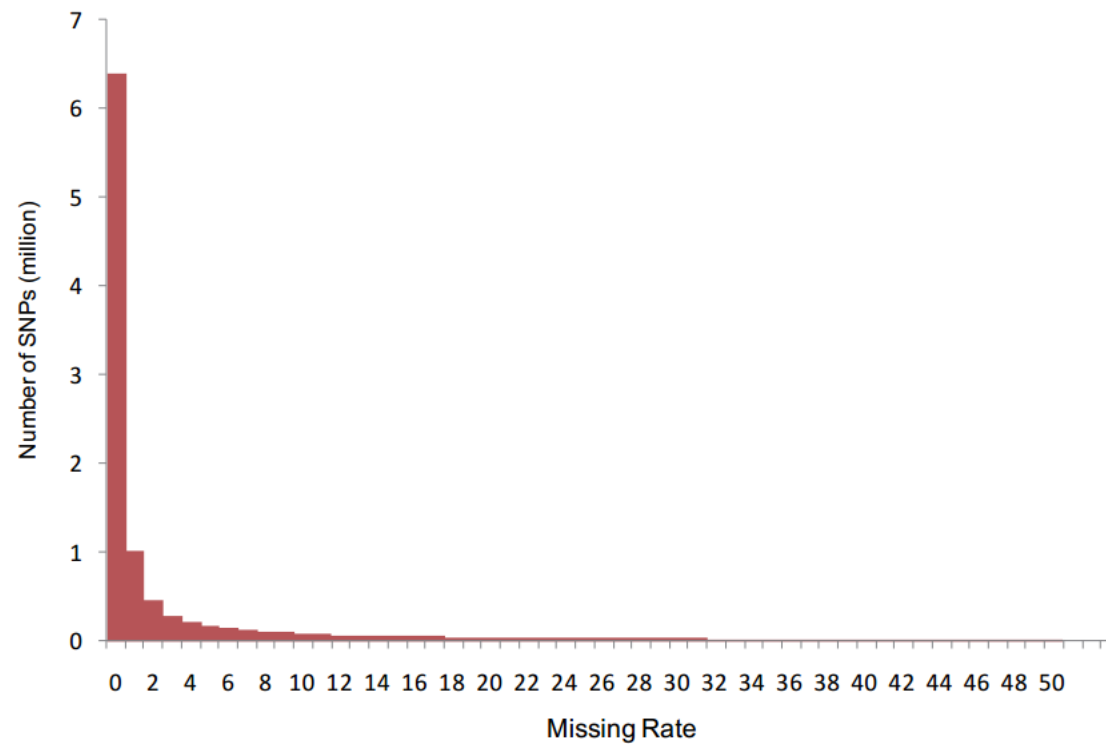



**Supplementary Figure 2. Distribution rate of indels.** Distribution rate of small insertion and deletions (indels) in different genomic regions. All identified indels are shorter than or equal to 5 bp.

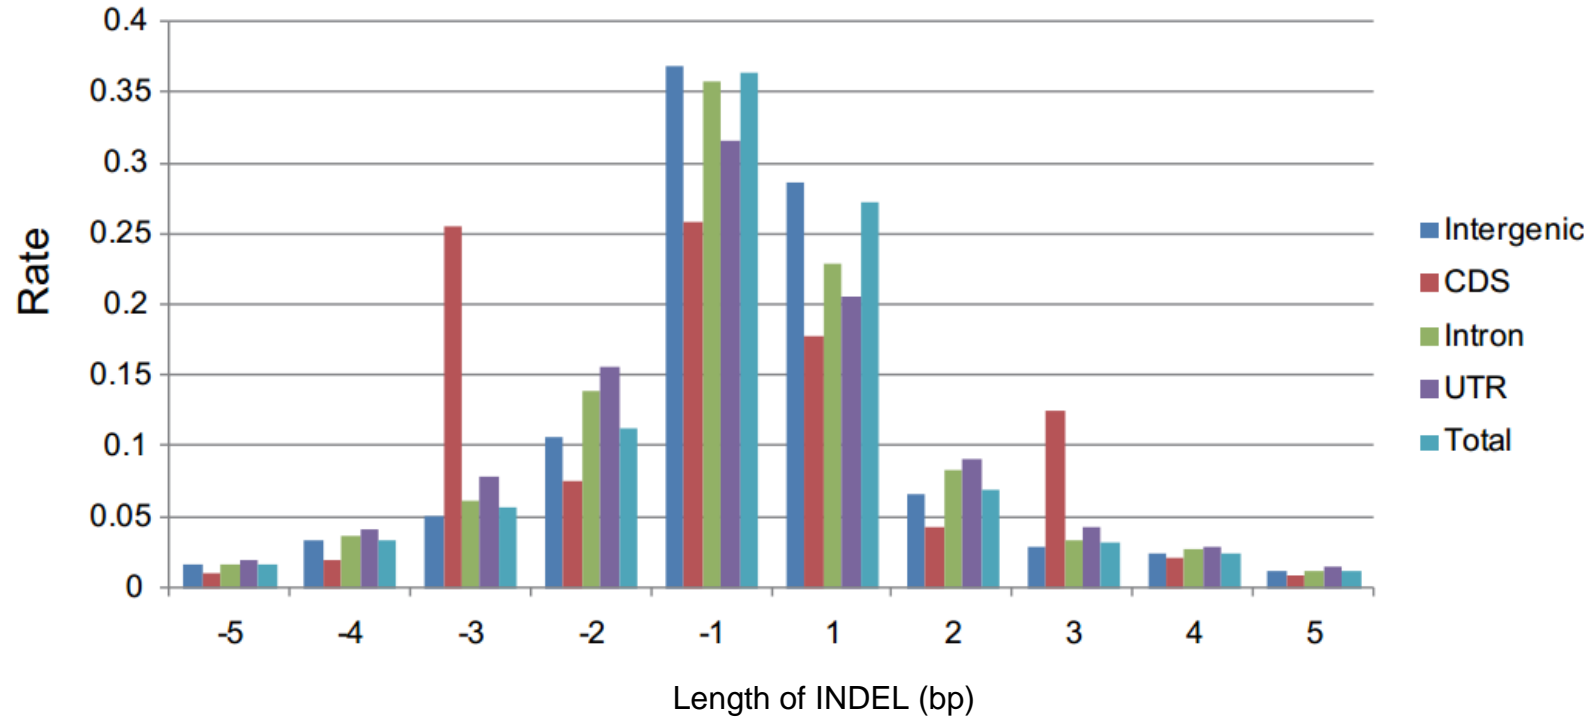

**Supplementary Figure 3. Gene ontology (GO) analysis of large effect SNPs genes within biological process, cellular component and molecular function.** **a.** Gene ontology (GO) of each Large effect SNPs genes were obtained by the annotation of gene functions using GO database. The blue bar is the ratio of certain category of genes number in the whole genome to the whole category gene numbers. **b.** GO enrichment analysis of large effect SNPs genes were calculated by Cytoscape 2.8 using the plugins BiNGO-2.44.

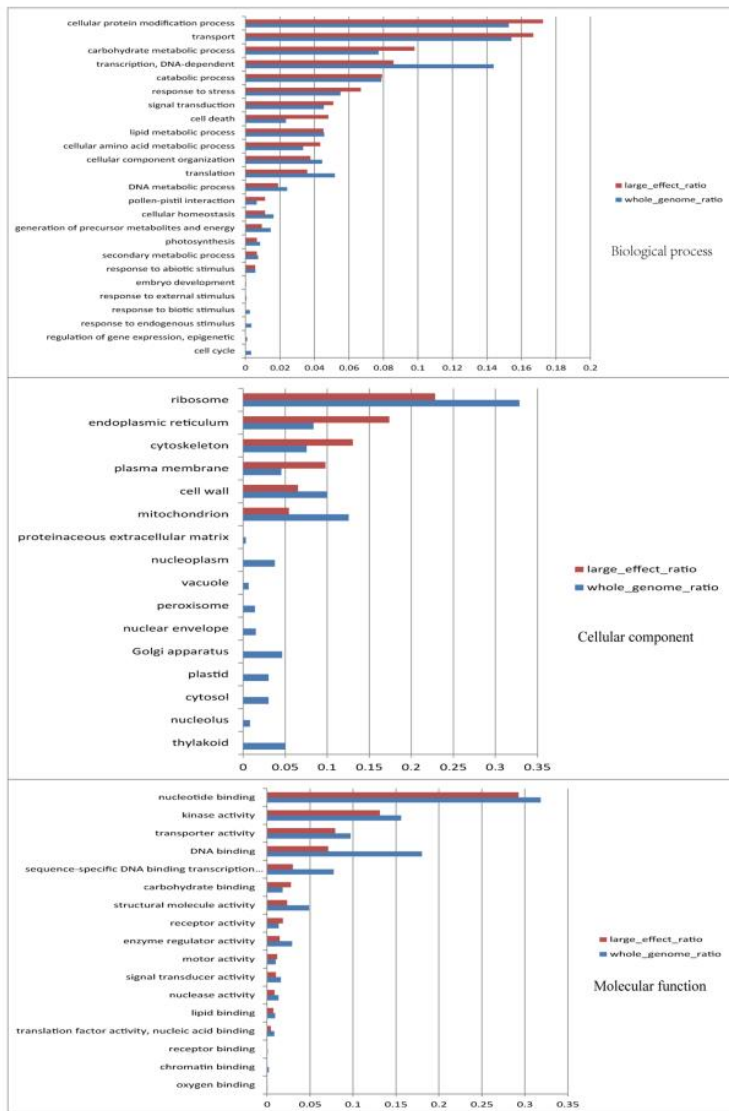

**Biological process**

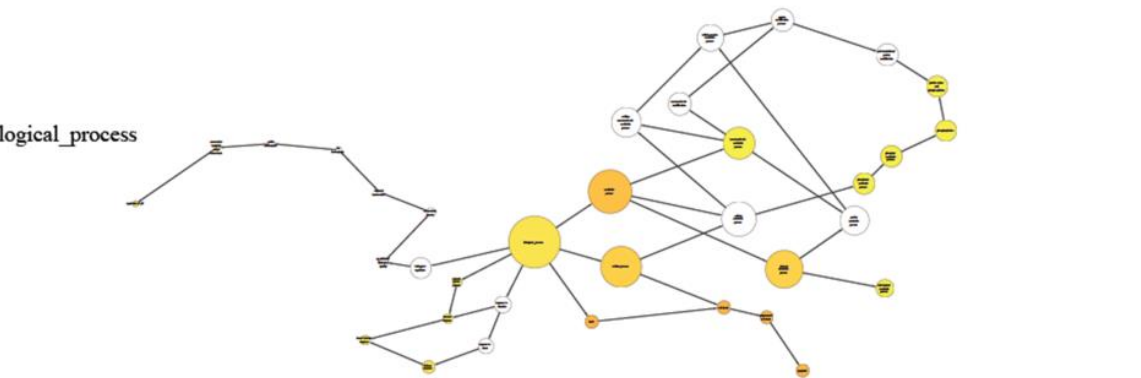

**Molecular function**

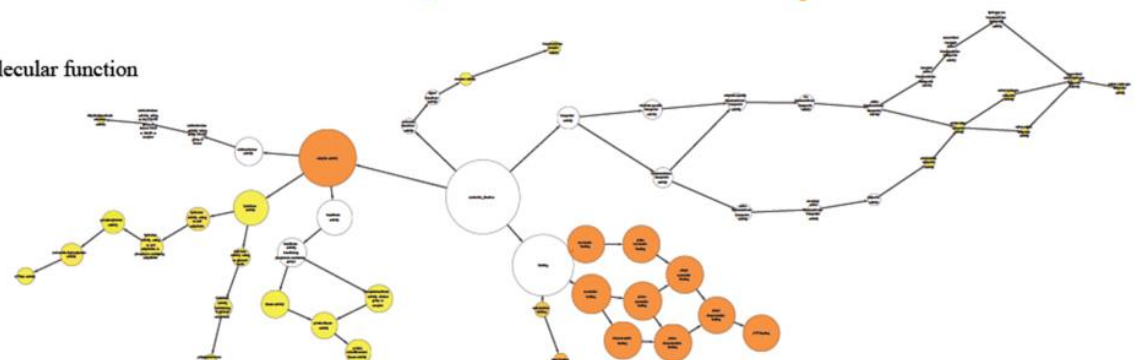

**Cellular component**

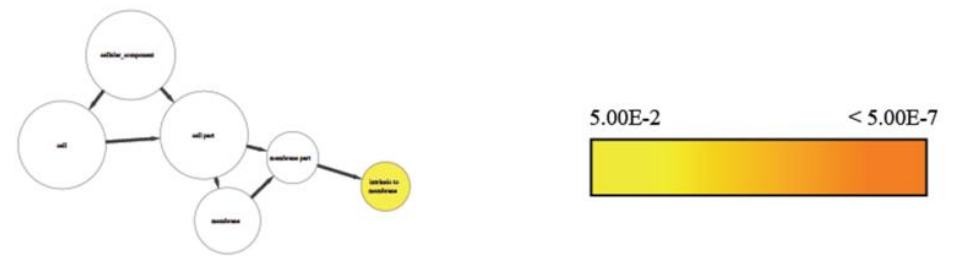

**Supplementary Figure 4. Gene ontology (GO) analysis of Present/Absent Variation (PAV) genes within biological process, cellular component and molecular function.** Gene ontology (GO) of each PAV genes were obtained by the annotation of gene functions using GO database.

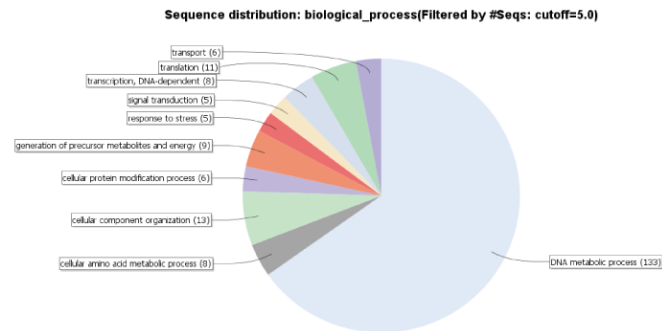

**Sequence distribution: cellular\_component(Filtered by #Seqs: cutoff=5.0)**

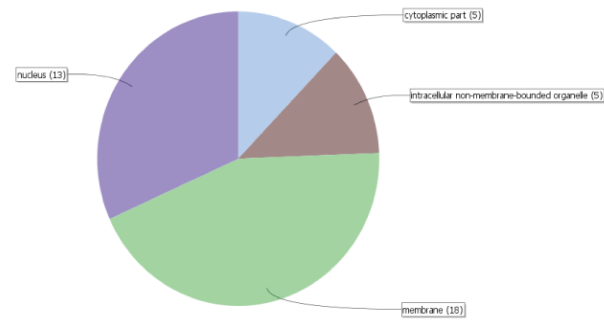

**Sequence distribution: molecular\_function(Filtered by #Seqs: cutoff=5.0)**

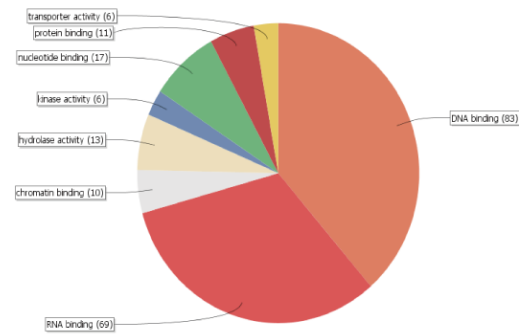

**Supplementary Figure 5.** Bayesian clustering analysis of all individual (STRUCTURE, K=3; K=4; K=5; and K=6).

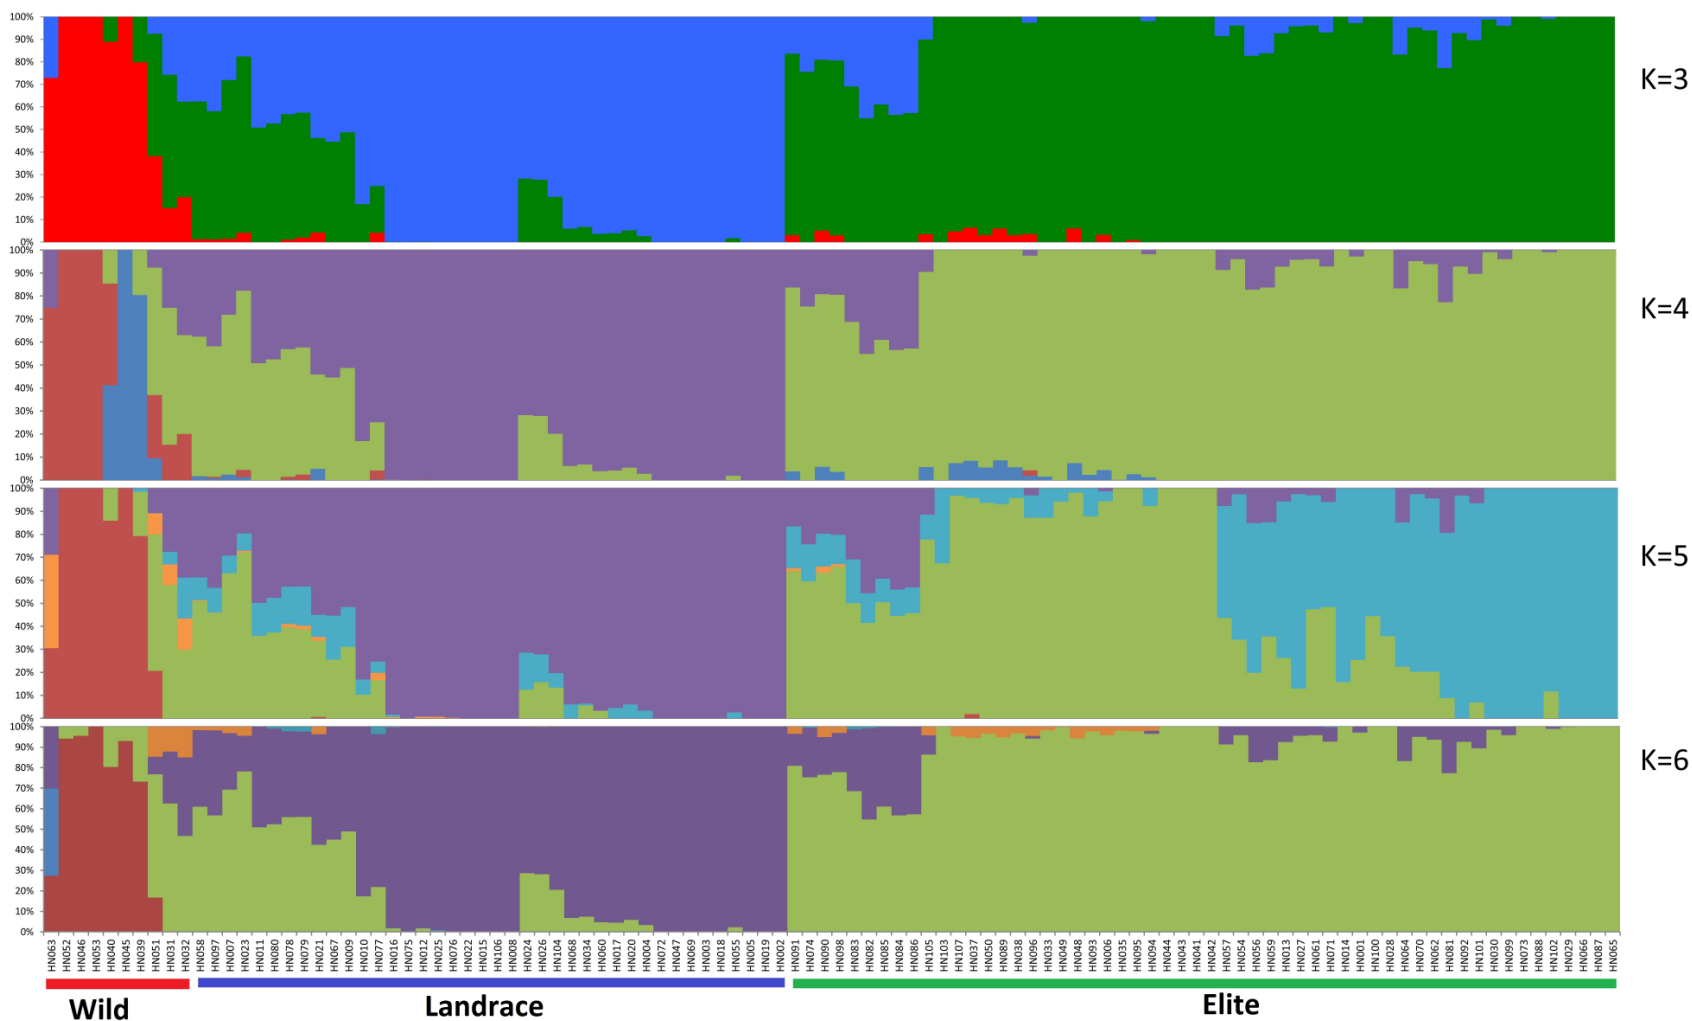

*Each line is represented by a vertical bar, and the length of each colored segment in each vertical bar represents the proportion contributed by the population.*

**Supplementary Figure 6.** Overlap of (a) Total SNPs and (b) non-synonymous SNPs in the three soybean gene pools (wild, landrace and elite cultivar).

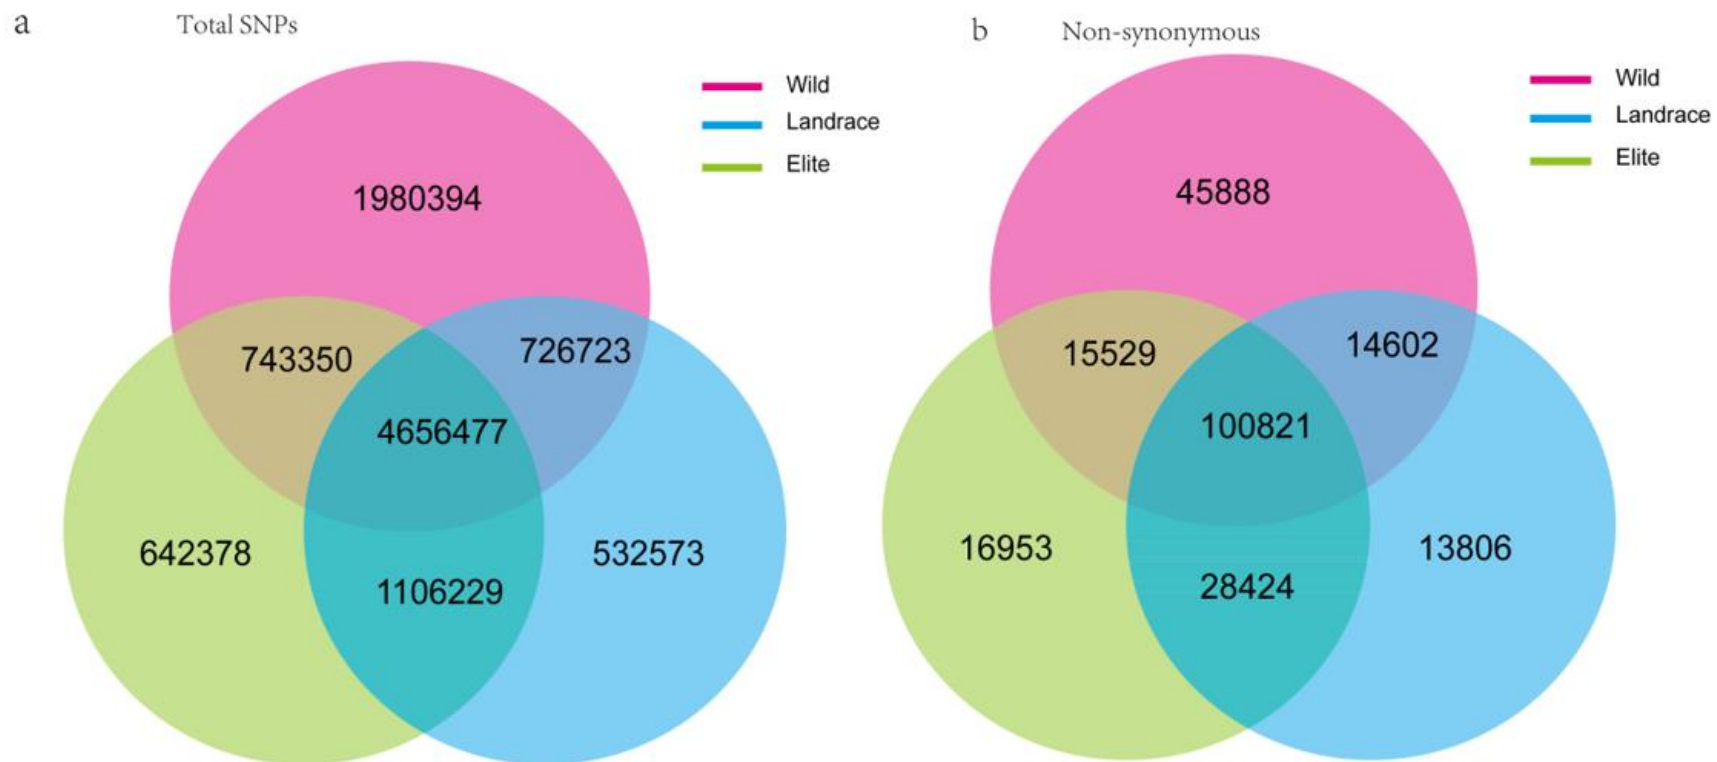

**Supplementary Figure 7. Comparison of the diversity ( $\theta\pi$ ) levels across genic and non-genic regions.** Coding regions displayed lower diversity levels relative to intron and UTR regions. The genic regions include both coding and non-coding regions of the genes (mRNA, CDS, UTR and intron), in comparison to the genic and non-genic regions genome-wide.

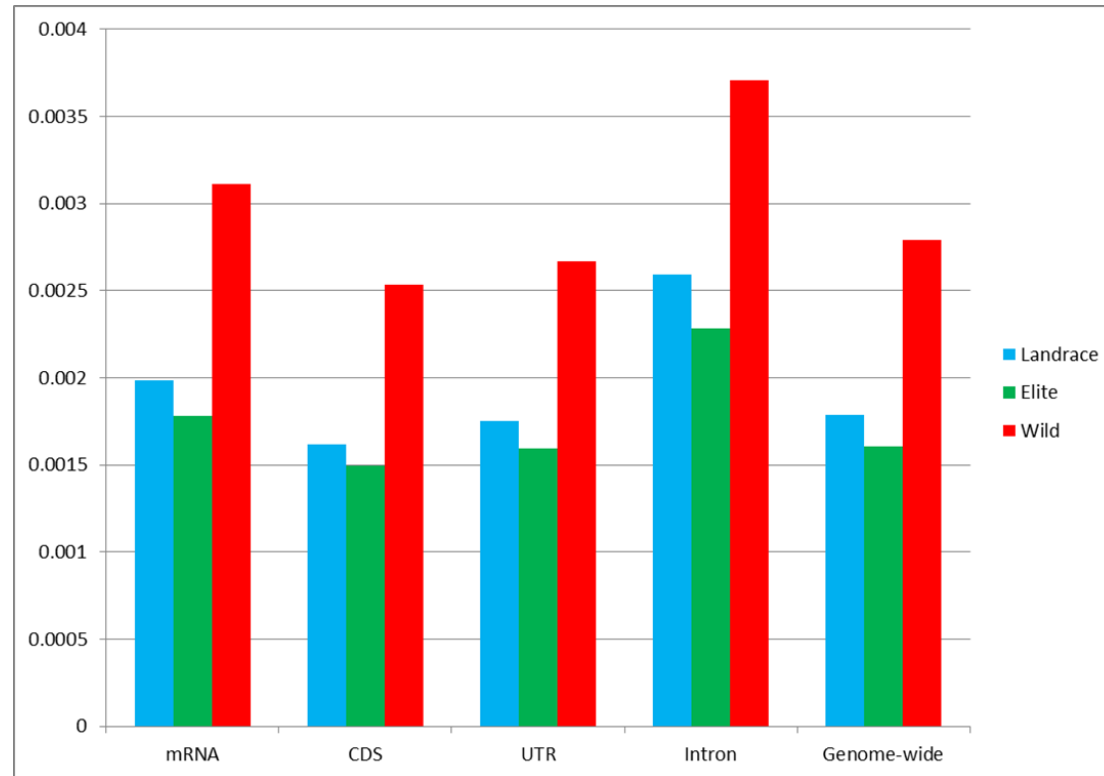

**Supplementary Figure 8.** Distribution of Genomic diversity ( $\theta_\pi$ ) for wild (red), landrace (blue), elite soybeans (green) and cultivated (orange) in 20 soybean chromosomes.

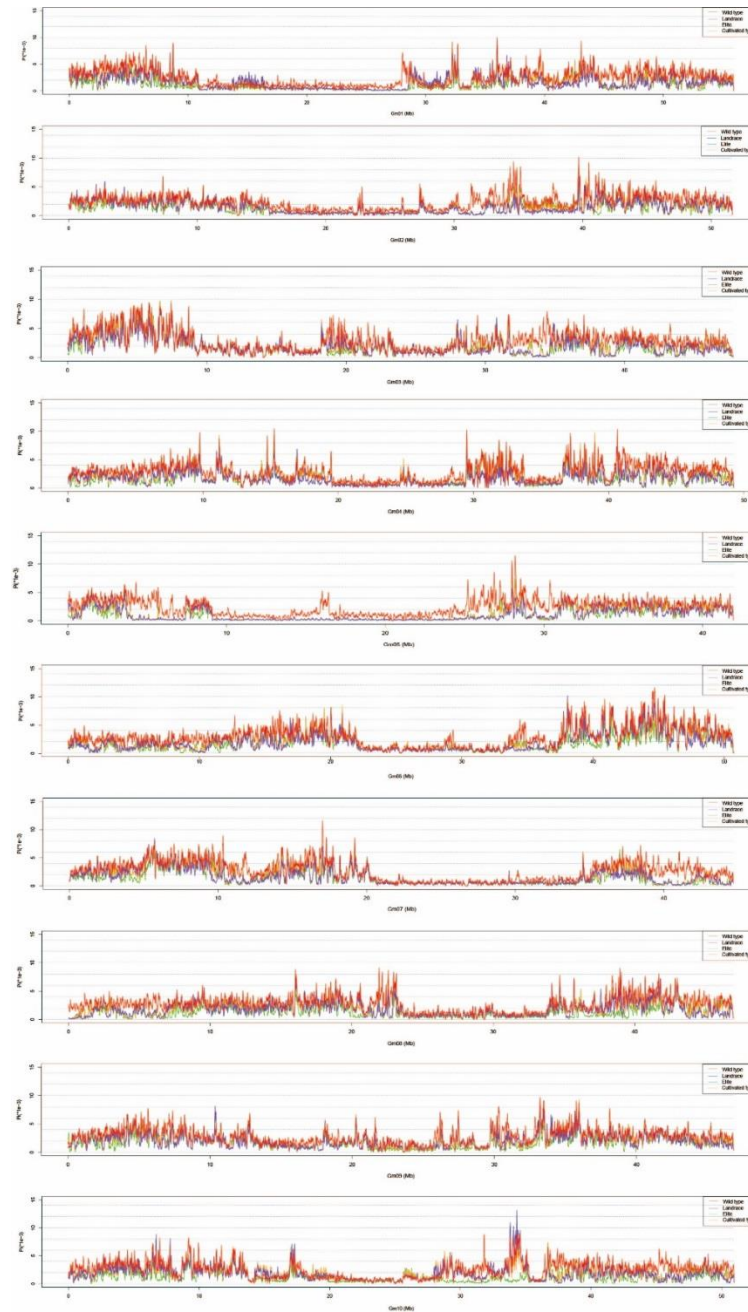

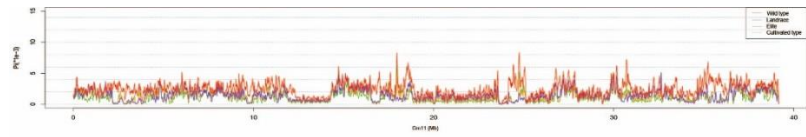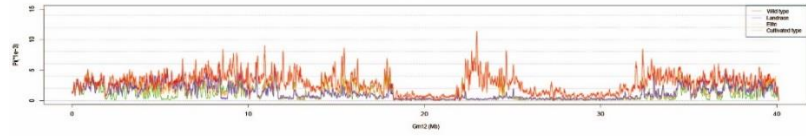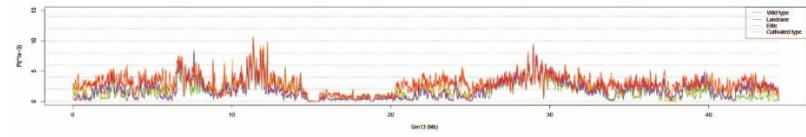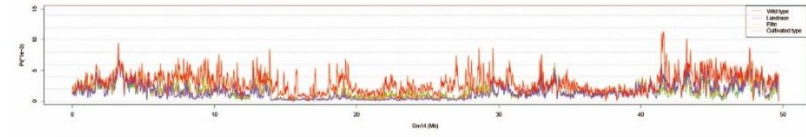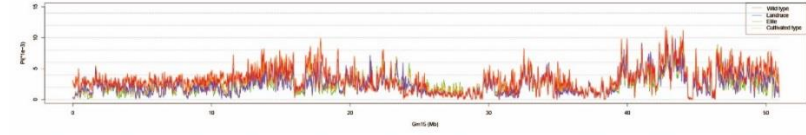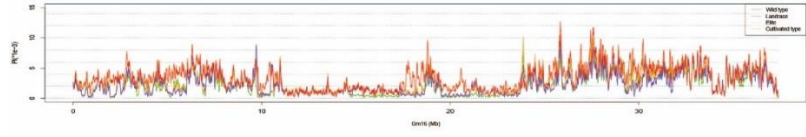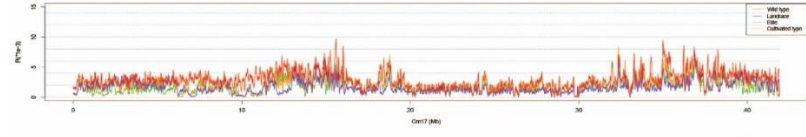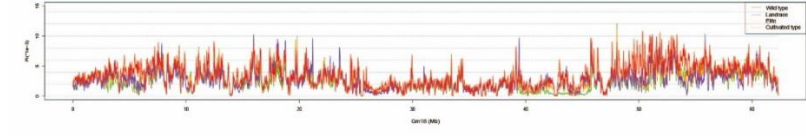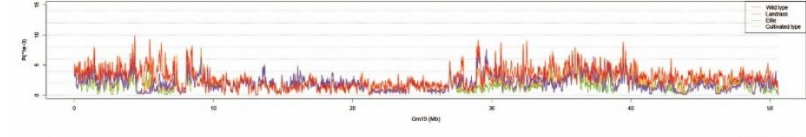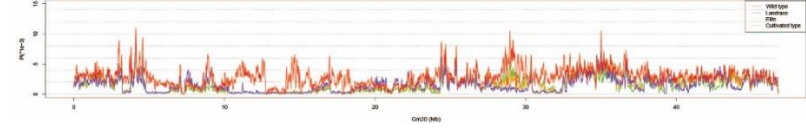



**Supplementary Figure 9. Frequency distribution of Genomic diversity ( $\theta_\pi$ ) and Divergence index value ( $F_{st}$ ).**  
Both  $F_{st}$  and  $\theta_\pi$  between wild, landrace and elite soybean was calculated.

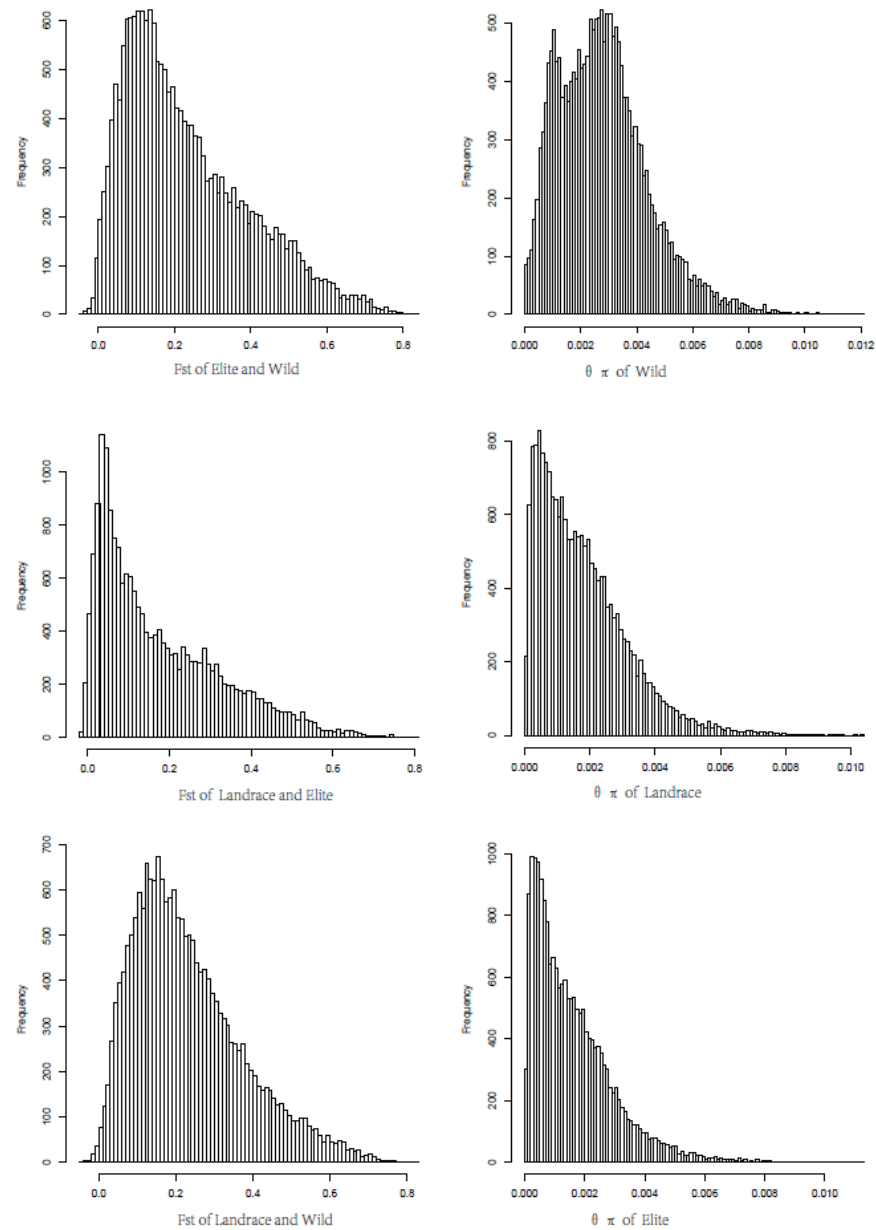

**Supplementary Figure 10 a-e. Haplotype analysis of Maturity genes. A- *E1*, B-*E2*, C-*E3*, D-*E4*, E-*Dt1*.** SNPviz software was used to draw pictorial clusters. Base position identical to reference (W82) are white, black – different, gray-missing data.

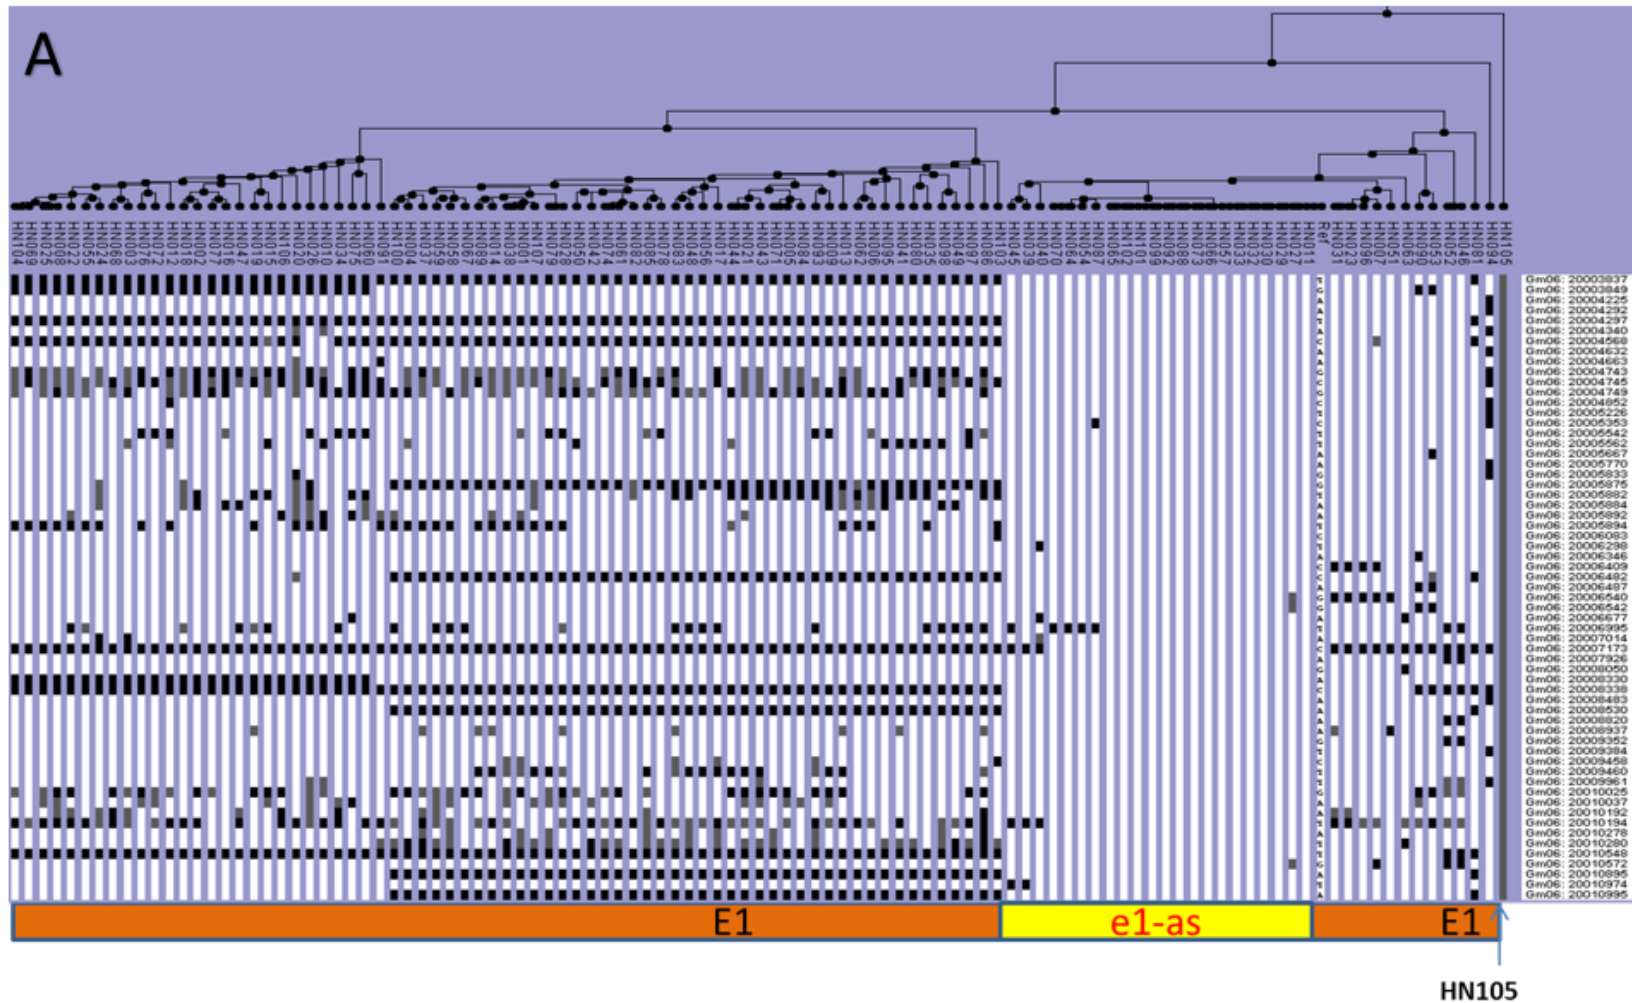

B

K521\*

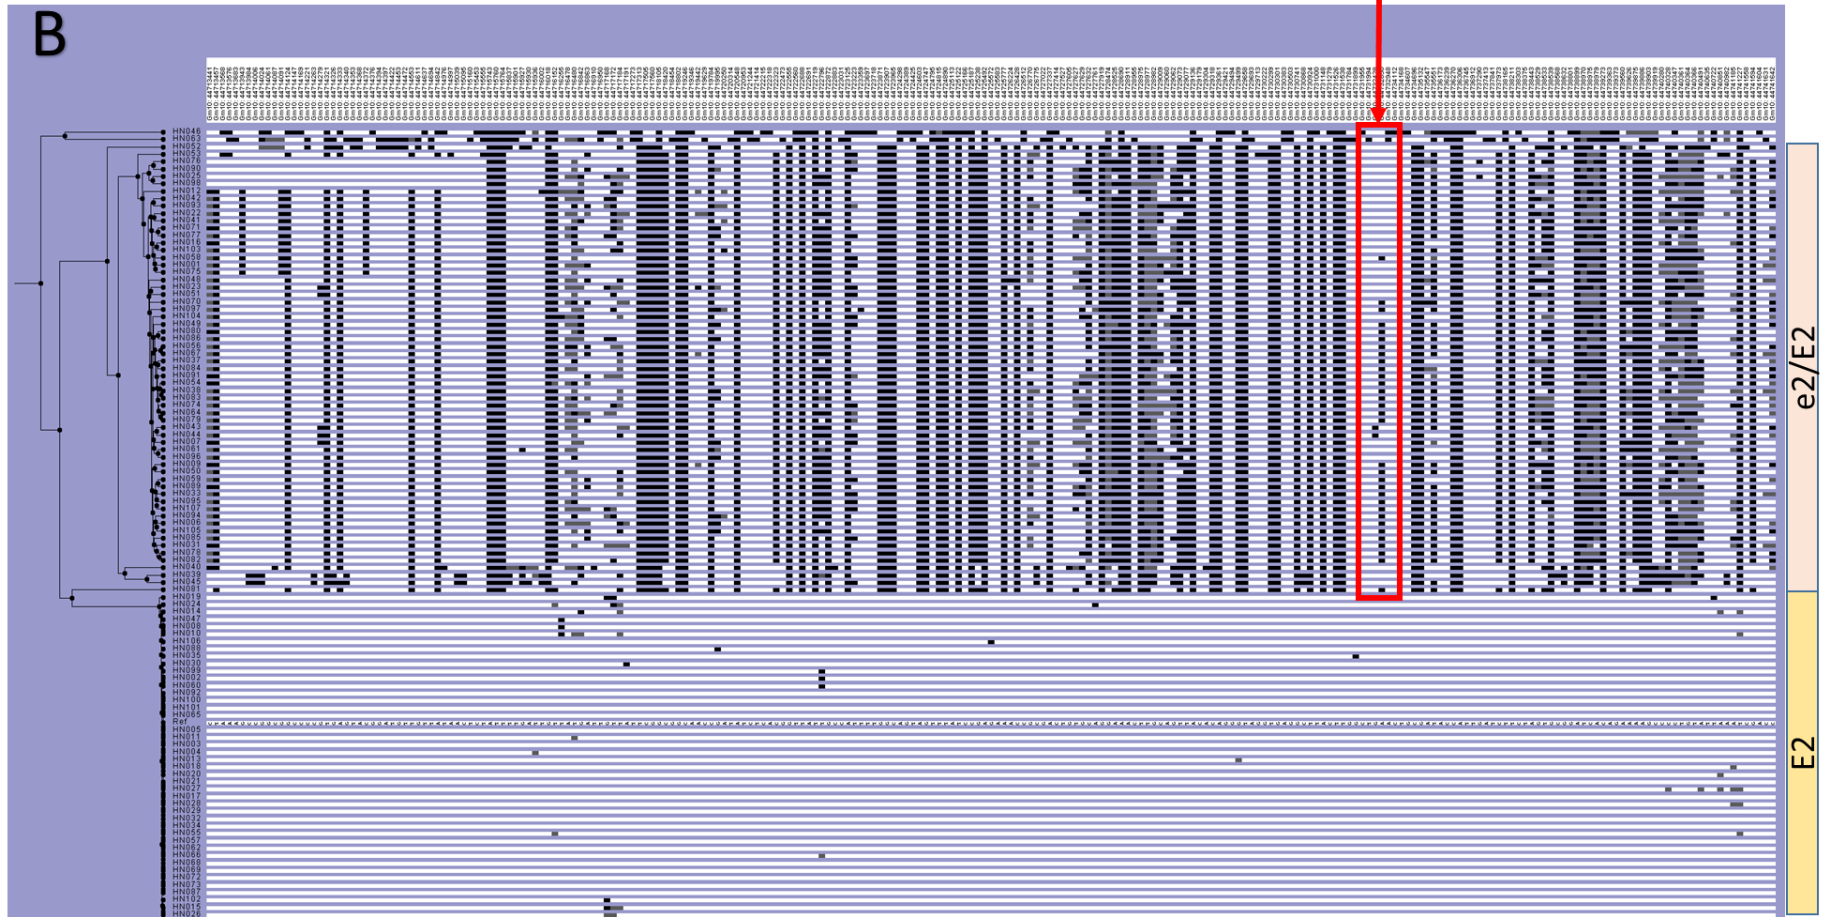

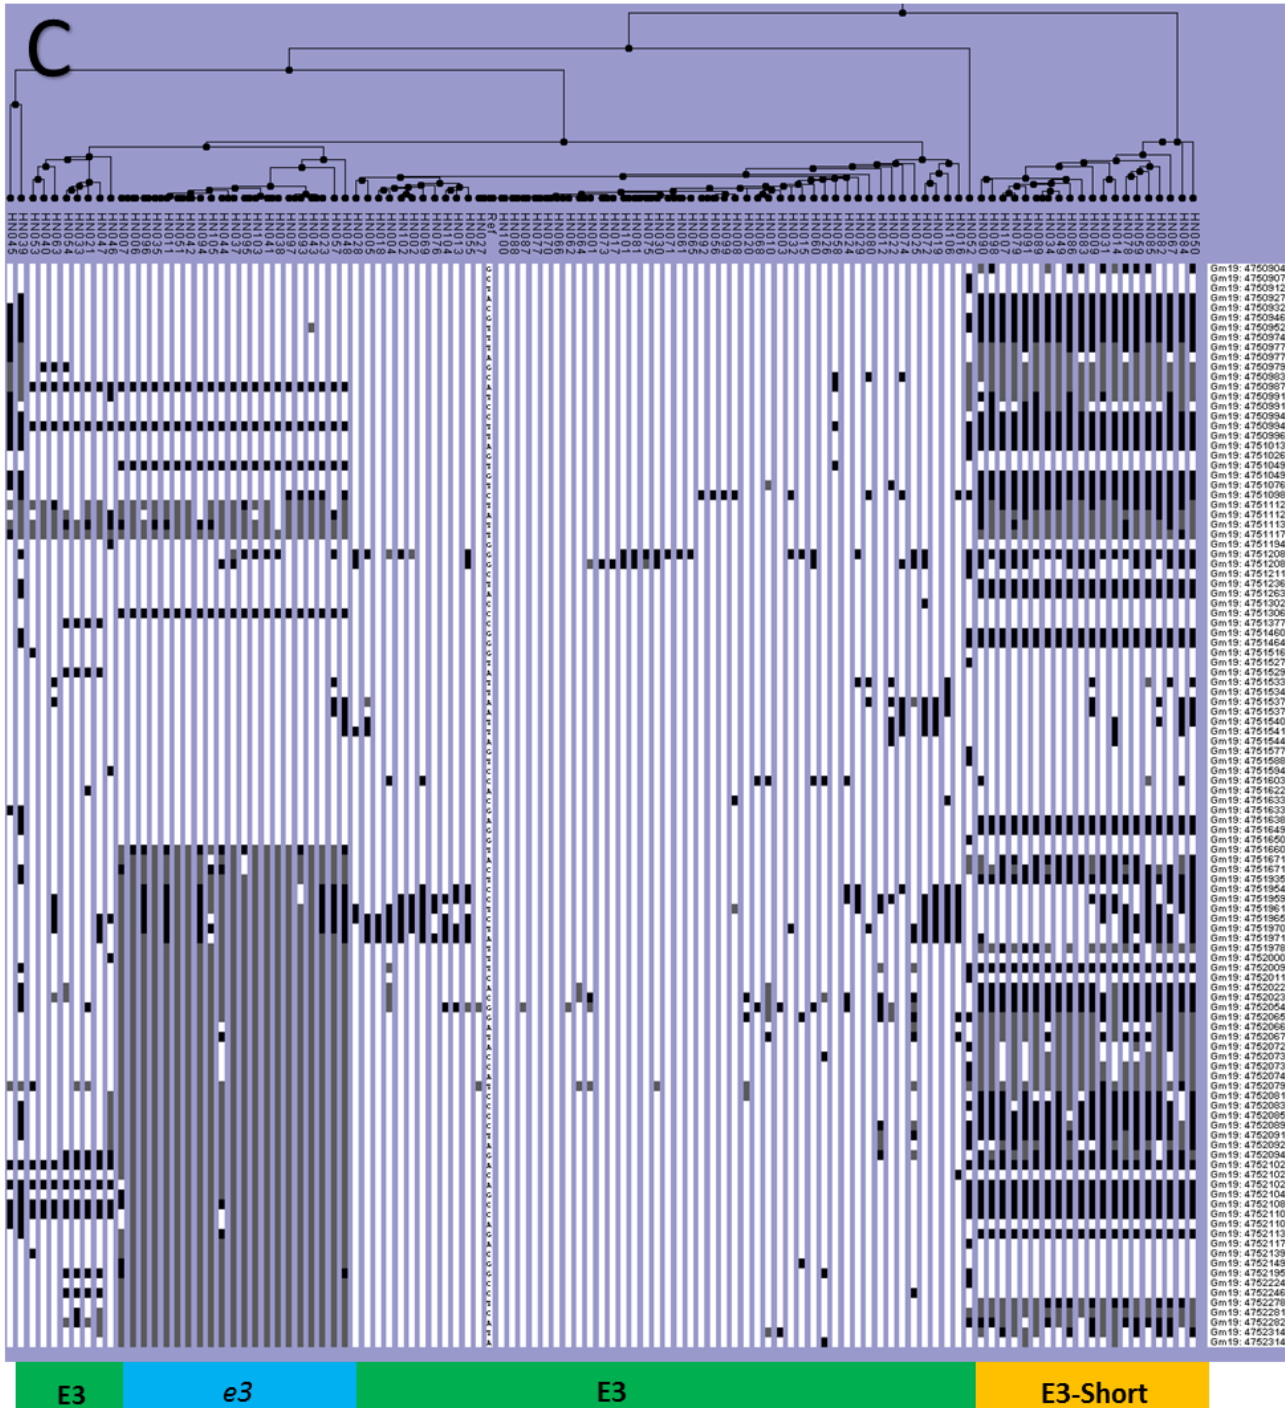

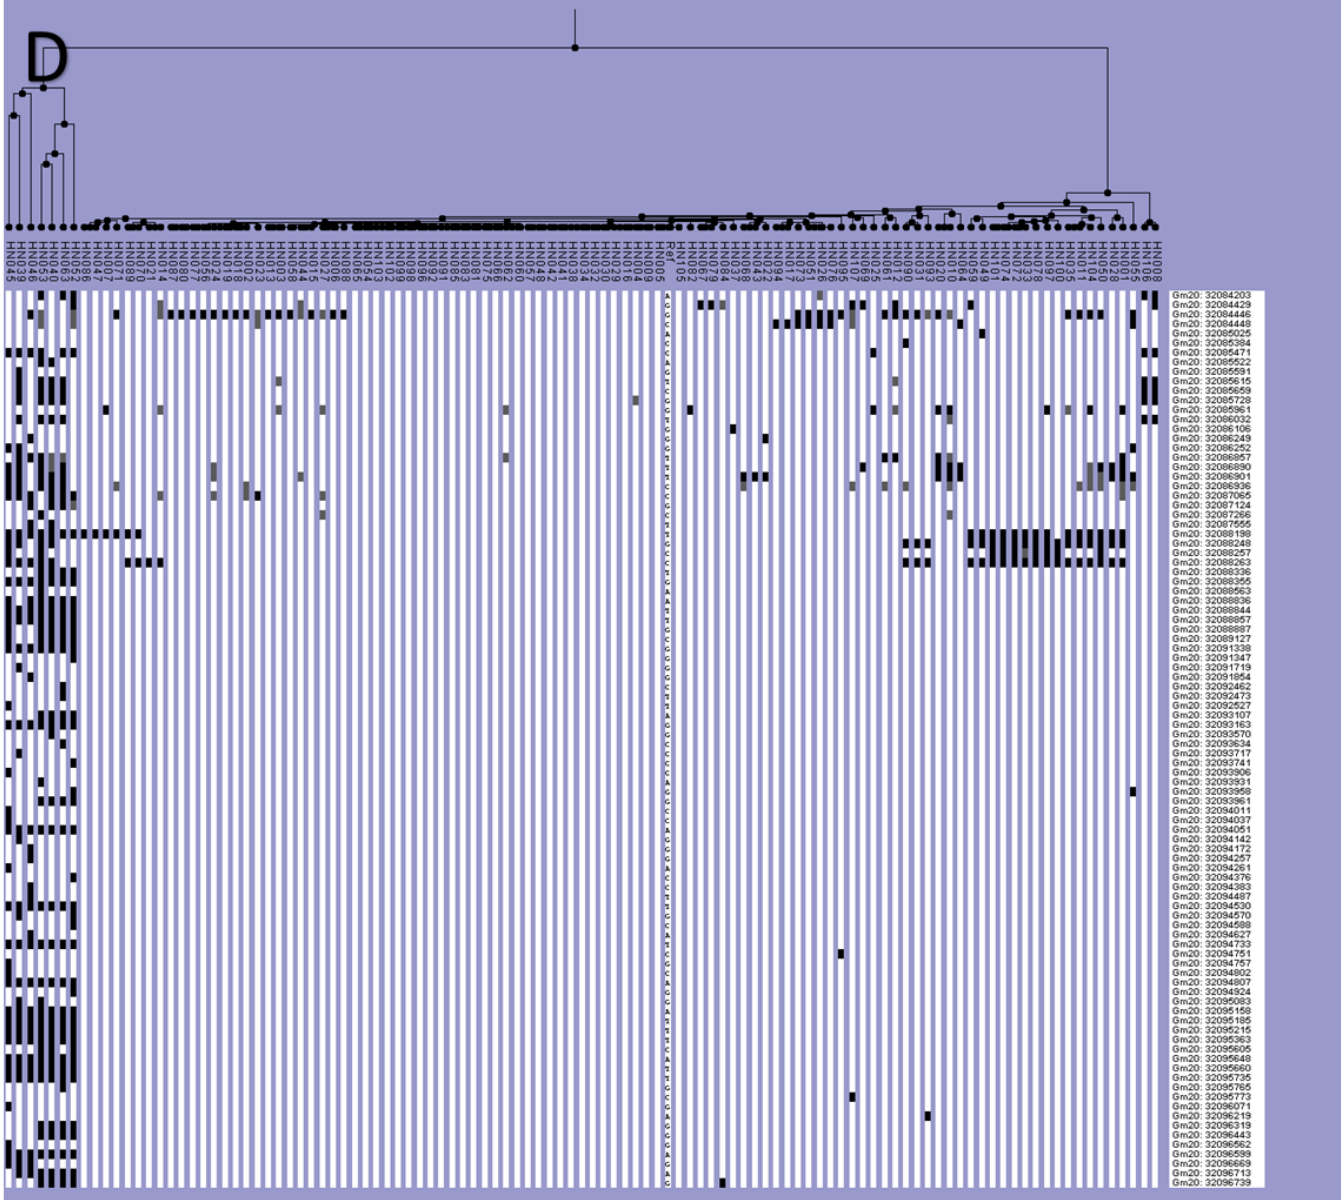



**Supplementary Figure 11a. Diversity and allelic variation of lipid biosynthesis genes.** Example showing the allelic variation of lipid biosynthesis related genes associated with a QTL controlling oil content. (a) The  $F_{ST}$  between wild, landrace and elite soybean; (b) Predicted gene models in the genomic block on Chromosome 13 (4.89-11.49 Mb); (c) Comparative analysis of amino acid polymorphism in the gene *Glyma13g04571.1*, a negative regulator of lipid biosynthesis.

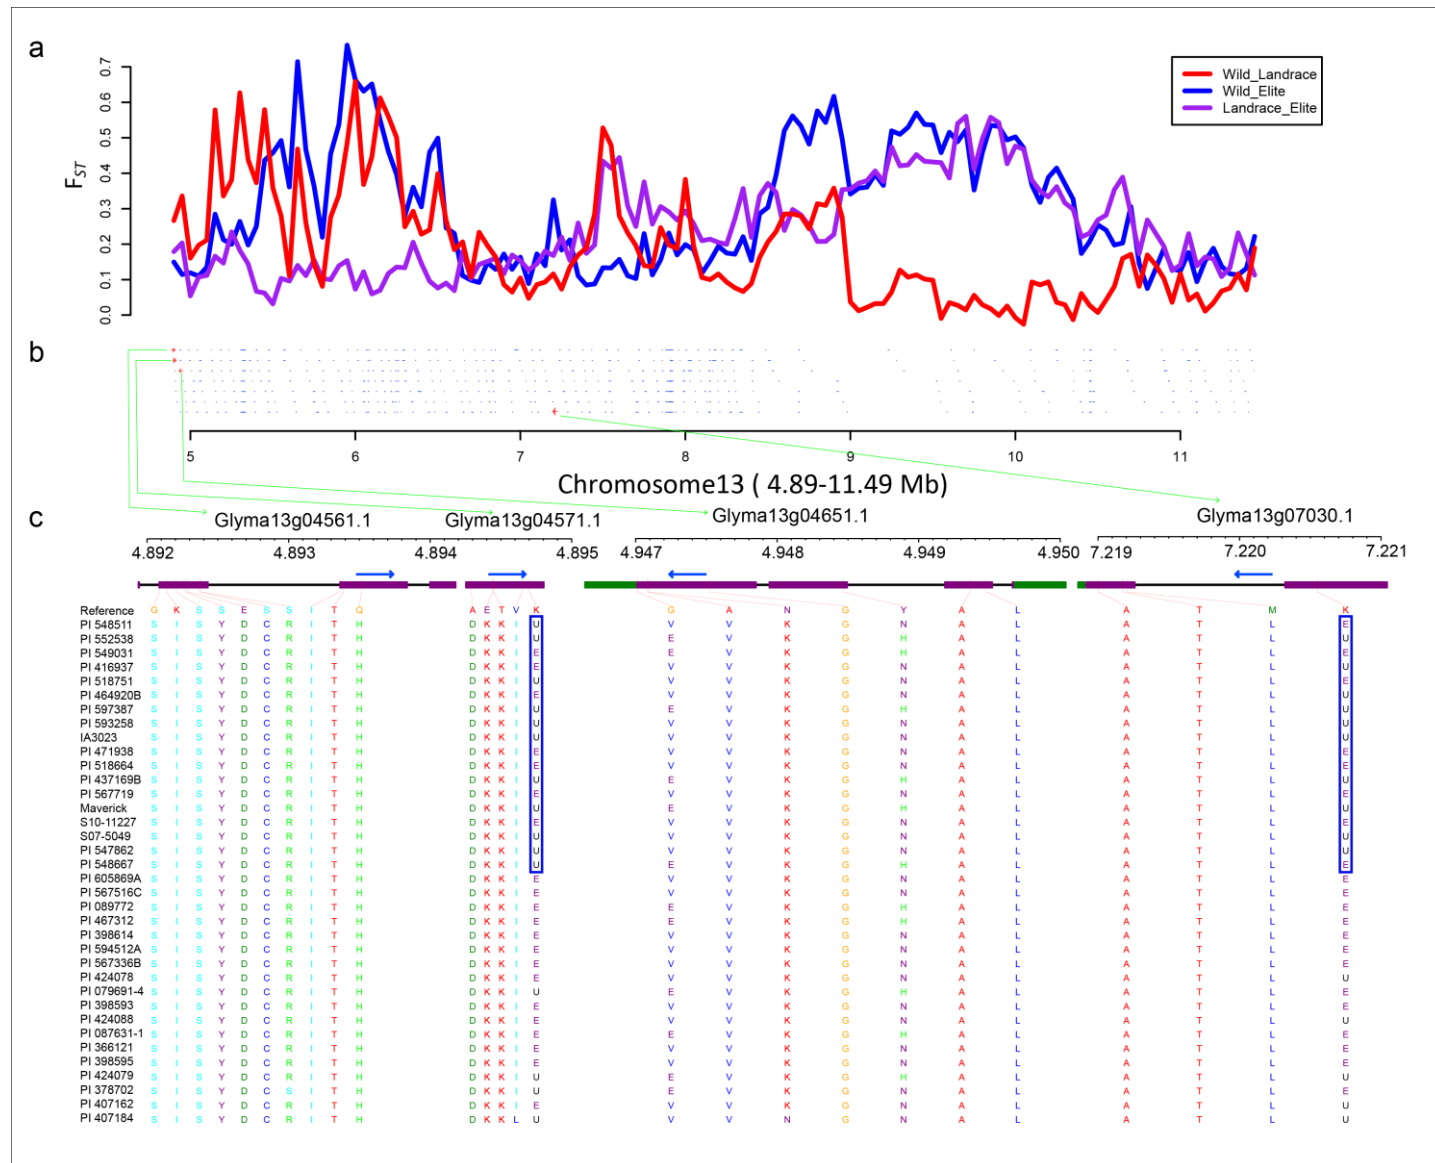

**Supplementary Figure 11b. Diversity and allelic variation of genes associated with protein content.** Example showing the allelic variation of seed protein related genes associated with a QTL controlling protein content. (a) The *F<sub>ST</sub>* between wild, landrace and elite soybean; (b) The genomic block on chromosome 20 (24.5 to 32.9 Mbp, 8.1 Mbp) is defined as major protein QTL for protein content. Predicted gene models in this genomic region; (c) Comparative analysis of amino acid polymorphism in the gene HSP, *Glyma20g19680*; Ammonium transporter, *Glyma20g21030*; ethylene receptor, *Glyma20g21780* associated with protein content.

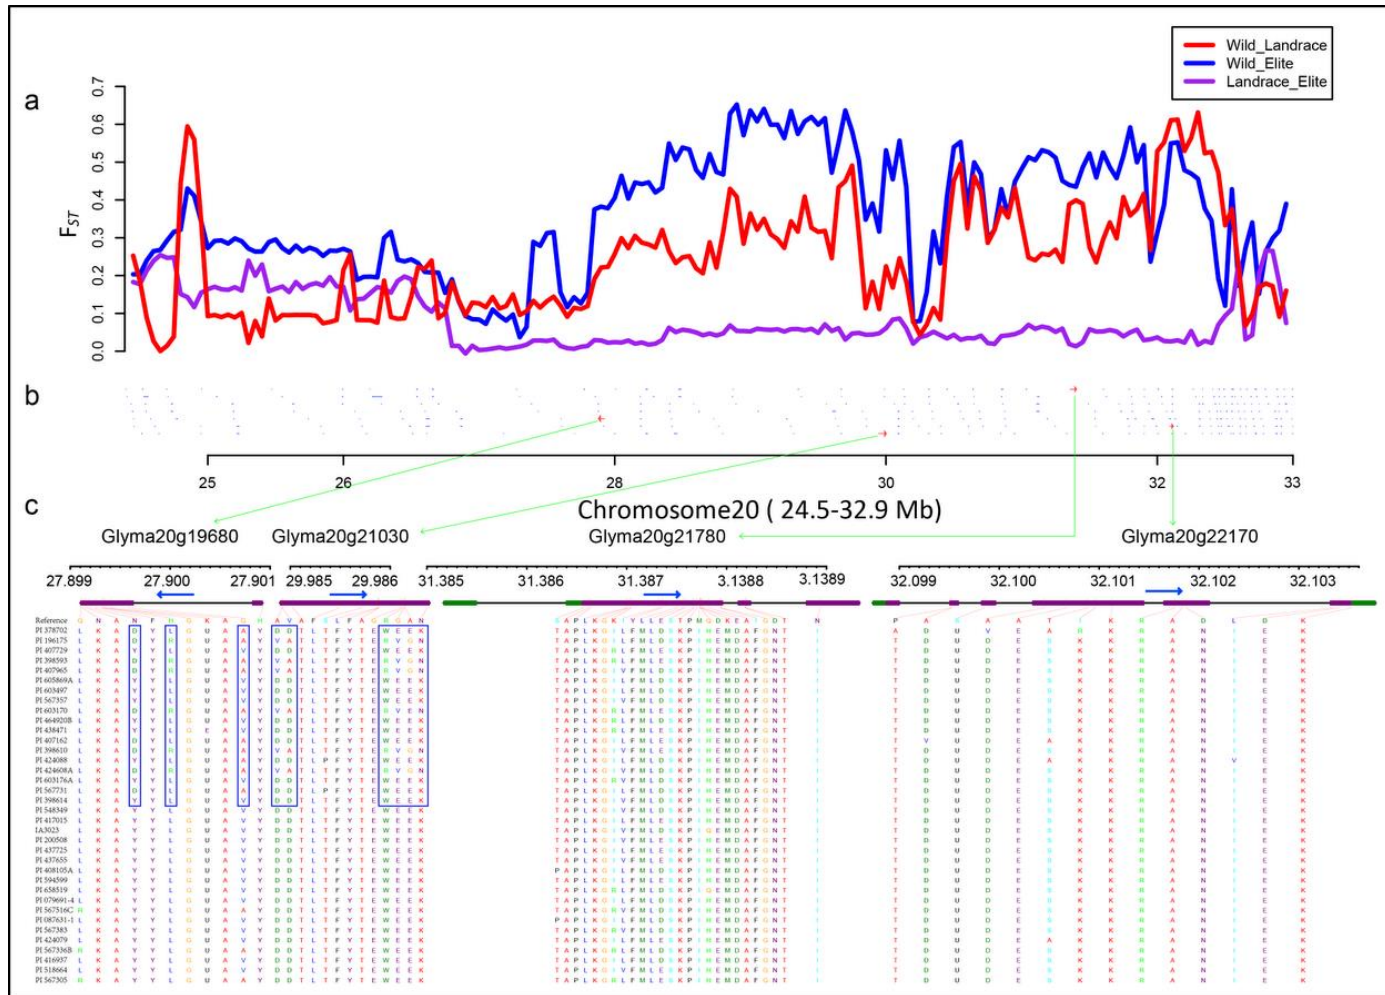



**Supplementary Figure 12a-b. Gene Structure variation in 106 lines.** **a.** Phylogenetic clustering of *CHX1* locus (gene + 2 kb promoter region) preceded three major clades. Samples were grouped by their sequence identity to the reference (W 82). W05 and C08 were used for comparing salt-tolerant and salt sensitive genotypes, respectively<sup>23</sup>. Known indicator lines are marked with arrows. **b.** *CHX1* gene architecture in 106 lines. Dotted lines indicating the exon position. Red lines indicating that this region is deleted in group 1 (G1). G2 and G1 group indicates the sensitive while G3 indicates salt tolerant group. However, no deletion was tested in the exon at the G1 group.

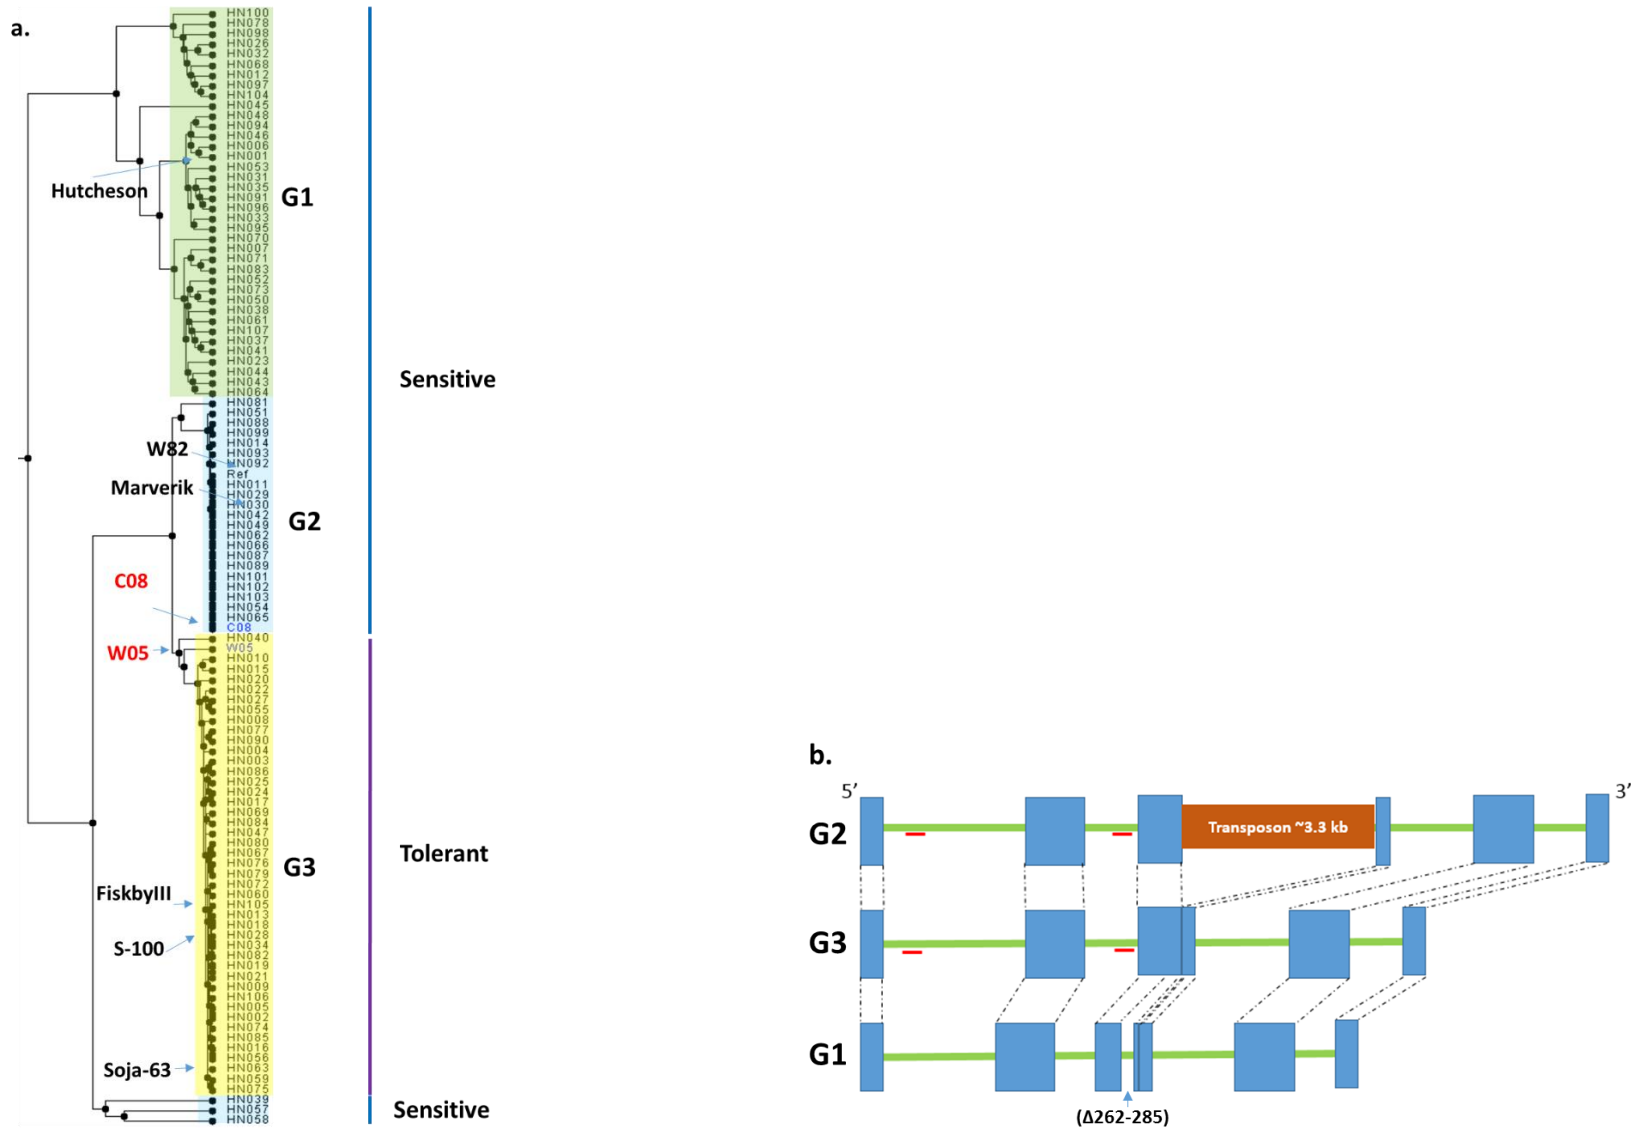

Supplement: srep23598-s1.pdf [file srep23598-s1.pdf]
